# Supplementary material for: C(sp3)–H cyclizations of 2-(2-vinyl)phenoxy-tert-anilines
Source: Royal Society of Chemistry journal article supplement (doi:10.1039/d3ra08974f), 2024-01-01
Supplement: d3ra08974f1.pdf [file d3ra08974f1.pdf]

Supplementary information for:

**C C(sp<sup>3</sup>)-H Cyclizations of 2-(2-Vinyl)phenoxy-*tert*-anilines**

Petra Dunkel,<sup>\*,a</sup> Dóra Bogdán,<sup>a</sup> Ruth Deme,<sup>a</sup> Ádám Zimber,<sup>a</sup> Veronika Ballayová,<sup>a,b</sup> Eszter Csizmadia,<sup>a</sup>  
Bence Kontra,<sup>a,c</sup> Eszter Kalydi,<sup>a</sup> Attila Bényei,<sup>d</sup> Péter Mátyus,<sup>a,e</sup> Zoltán Mucsi,<sup>\*,c,f,g</sup>

<sup>a</sup>*Department of Organic Chemistry, Semmelweis University, Hőgyes Endre utca 7, H-1092 Budapest, Hungary, E-mail: dunkel.petra@semmelweis.hu*

<sup>b</sup>*Department of Chemical Drugs, Masaryk University, Palackého 1946/1, 612 00 Brno, Czech Republic*

<sup>c</sup>*Brain Vision Center, Department of Biological Chemistry, Liliom utca 43-45, H-1094 Budapest, Hungary*

<sup>d</sup>*Institute of Physical Chemistry, University of Debrecen, Egyetem tér 1, H-4010 Debrecen, Hungary*

<sup>e</sup>*University of Veterinary Medicine, István utca 2, H-1078 Budapest, Hungary*

<sup>f</sup>*Department of Chemistry, Femtonics Ltd., Tűzoltó utca 59, H-1094 Budapest, Hungary, E-mail: zmuksi@femtonics.eu*

<sup>g</sup>*Institute of Chemistry, University of Miskolc, Egyetem út 1, H-3515 Miskolc, Hungary*

**Table of contents**

**The xyz coordinates of computed geometries**

**2**

**Table S3.** Computed energies (E), zero point energies, internal energies (U), enthalpies (H) and Gibbs free energies (G) given in Hartree as well as entropies (S) given in J mol<sup>-1</sup> K<sup>-1</sup> at B3LYP/6-31G(d,p) basis set with the consideration of PCM solvent method using the parameter set of the solvent applied.

|                                              |  | <b>E</b>      | <b>ZPE</b>  | <b>U</b>    | <b>H</b>    | <b>G</b>    | <b>S</b> |
|----------------------------------------------|--|---------------|-------------|-------------|-------------|-------------|----------|
| 0001aaa_pentadiene_B3LYP631dp_PCMw.log       |  | -195.31790169 | -195.204286 | -195.198288 | -195.197343 | -195.233247 | 75.566   |
| 0001aba_pentadiene_B3LYP631dp_PCMDmso.log    |  | -195.31787355 | -195.204256 | -195.198257 | -195.197313 | -195.233216 | 75.565   |
| 0001aca_pentadiene_B3LYP631dp_PCMmecn.log    |  | -195.31785205 | -195.204233 | -195.198234 | -195.197290 | -195.233193 | 75.565   |
| 0001ada_pentadiene_B3LYP631dp_PCMDce.log     |  | -195.31763906 | -195.204001 | -195.198004 | -195.197060 | -195.232959 | 75.556   |
| 0001aea_pentadiene_B3LYP631dp_PCMTol.log     |  | -195.31692093 | -195.203230 | -195.197233 | -195.196289 | -195.232186 | 75.551   |
| 0001afa_pentadiene_B3LYP631dp_vacuo.log      |  | -195.31617216 | -195.202406 | -195.196416 | -195.195472 | -195.231343 | 75.496   |
| 0001baa_pentadiene_TS_b3lyp631dp_PCMw.log    |  | -195.26309710 | -195.153001 | -195.148362 | -195.147418 | -195.180289 | 69.183   |
| 0001bba_pentadiene_TS_b3lyp631dp_PCMDmso.log |  | -195.26306995 | -195.152969 | -195.148330 | -195.147386 | -195.180257 | 69.183   |
| 0001bca_pentadiene_TS_b3lyp631dp_PCMacn.log  |  | -195.26304869 | -195.152947 | -195.148308 | -195.147364 | -195.180235 | 69.182   |
| 0001bda_pentadiene_TS_b3lyp631dp_PCMDce.log  |  | -195.26283924 | -195.152712 | -195.148075 | -195.147131 | -195.179999 | 69.176   |
| 0001bea_pentadiene_TS_b3lyp631dp_PCMTol.log  |  | -195.26212752 | -195.151922 | -195.147290 | -195.146346 | -195.179205 | 69.158   |
| 0001bfa_pentadiene_TS_b3lyp631dp_vacuo.log   |  | -195.26137793 | -195.151106 | -195.146478 | -195.145534 | -195.178386 | 69.143   |

**Table S4.** Computed energies (E), zero point energies, internal energies (U), enthalpies (H) and Gibbs free energies (G) given in Hartree as well as entropies (S) given in J mol<sup>-1</sup> K<sup>-1</sup> at B3LYP/6-31G(d,p) basis set with the consideration of PCM solvent method using the parameter set of the solvent applied.

|                                                                    | E             | ZPE         | U           | H           | G           | S       |
|--------------------------------------------------------------------|---------------|-------------|-------------|-------------|-------------|---------|
| 0101aaa Ph NMeBn CHC H CN B3lyp631pd_PCMdmsol.log                  | -766.94380112 | -766.656461 | -766.639753 | -766.638809 | -766.702420 | 133.880 |
| 0101aaa Ph NMeBn CHC H CN_ZW_INT_B3lyp631pd_PCMdmsol.log           | -766.87829798 | -766.592692 | -766.575822 | -766.574878 | -766.639173 | 135.321 |
| 0101daa Ph NMeBn CHC H CN_ZW_INT_B3lyp631pd_PCMdmsol_TS_CH.log     | -766.87756629 | -766.593863 | -766.577668 | -766.576724 | -766.638829 | 130.712 |
| 0108aaa Ph NMeBn CHC H CN_product_B3lyp631pd_PCMdmsol.log          | -766.95996671 | -766.670420 | -766.654675 | -766.653731 | -766.713986 | 126.817 |
| 0108baa Ph NMeBn CHC H CN_product_B3lyp631pd_PCMdmsol.log          | -766.95785697 | -766.668347 | -766.652475 | -766.651531 | -766.712671 | 128.681 |
| 0201aaa Ph NMeBn CHC Me COOMe_B3lyp631pd_PCMdmsol.log              | -941.89828990 | -941.538889 | -941.517871 | -941.516927 | -941.591132 | 156.178 |
| 0202aaa Ph NMeBn CHC Me COOMe_ZW_INT_B3lyp631pd_PCMdmsol.log       | -941.83182498 | -941.474415 | -941.453282 | -941.452338 | -941.526596 | 156.290 |
| 0203daa Ph NMeBn CHC Me COOMe_ZW_INT_B3lyp631pd_PCMdmsol_TS_CH.log | -941.83102850 | -941.474196 | -941.453727 | -941.452783 | -941.525090 | 152.183 |
| 0208aba Ph NMeBn CHC Me COOMe_product_B3lyp631pd_PCMdmsol.log      | -941.91538054 | -941.553707 | -941.533781 | -941.532836 | -941.602166 | 145.916 |
| 0208abb Ph NMeBn CHC Me COOMe_product_B3lyp631pd_PCMdmsol.log      | -941.91232294 | -941.550880 | -941.530986 | -941.530042 | -941.599543 | 146.278 |
| 0301aaa Ph NMeBn CHC COOMe_CN_B3lyp631pd_PCMdmsol.log              | -994.82314482 | -994.492838 | -994.471622 | -994.470678 | -994.545227 | 156.903 |
| 0301daa Ph NMeBn CHC COOMe_CN_ZW_INT_B3lyp631pd_PCMdmsol_TS_CH.log | -994.77751645 | -994.451732 | -994.430970 | -994.430026 | -994.503460 | 154.556 |
| 0308aaa Ph NMeBn CHC COOMe_CN_product_B3lyp631pd_PCMdmsol.log      | -994.82868128 | -994.497144 | -994.476438 | -994.475494 | -994.547811 | 152.206 |
| 0308aba Ph NMeBn CHC COOMe_CN_product_B3lyp631pd_PCMdmsol.log      | -994.83455861 | -994.502679 | -994.482259 | -994.481315 | -994.552343 | 149.491 |
| 0308abb Ph NMeBn CHC COOMe_CN_product_B3lyp631pd_PCMdmsol.log      | -994.82940934 | -994.497795 | -994.477355 | -994.476410 | -994.547572 | 149.773 |
| 0401aaa Ph NMeBn CHC H H_B3lyp631pd_PCMdmsol.log                   | -674.69225799 | -674.404056 | -674.389112 | -674.388168 | -674.447023 | 123.871 |
| 0408aaa Ph NMeBn CHC H H_product_B3lyp631pd_PCMdmsol.log           | -674.71915830 | -674.428190 | -674.414308 | -674.413364 | -674.469209 | 117.536 |
| 0501aaa Ph NMeBn CHC NO2 Me_B3lyp631pd_PCMdmsol.log                | -918.52156936 | -918.202322 | -918.183413 | -918.182469 | -918.251604 | 145.508 |
| 0502aaa Ph NMeBn CHC NO2 Me_ZW_INT_B3lyp631pd_PCMdmsol.log         | -918.48173014 | -918.162393 | -918.143343 | -918.142398 | -918.211434 | 145.297 |
| 0503daa Ph NMeBn CHC NO2 Me_ZW_INT_B3lyp631pd_PCMdmsol_TS_CH.log   | -918.46904569 | -918.154454 | -918.135865 | -918.134921 | -918.202737 | 142.730 |
| 0508aaa Ph NMeBn CHC NO2 Me_product_B3lyp631pd_PCMdmsol.log        | -918.54189897 | -918.220248 | -918.202383 | -918.201439 | -918.266195 | 136.291 |
| 0508aba Ph NMeBn CHC NO2 Me_product_B3lyp631pd_PCMdmsol.log        | -918.54189907 | -918.220250 | -918.202383 | -918.201439 | -918.266201 | 136.303 |
| 0508abb Ph NMeBn CHC NO2 Me_product_B3lyp631pd_PCMdmsol.log        | -918.53935849 | -918.217830 | -918.200036 | -918.199092 | -918.263501 | 135.560 |

**Table S5** Computed energies (E), zero point energies, internal energies (U), enthalpies (H) and Gibbs free energies (G) given in Hartree as well as entropies (S) given in J mol<sup>-1</sup> K<sup>-1</sup> at B3LYP/6-31G(d,p) basis set with the consideration of PCM solvent method using the parameter set of the solvent applied.

|         |          |           | E              | ZPE          | U            | H            | G            | S       |
|---------|----------|-----------|----------------|--------------|--------------|--------------|--------------|---------|
| 0601aaa | Ph NMeBn | CHC CN CN | B3lyp631pd     | PCMdmsol     |              |              |              |         |
|         |          |           | -859.17959000  | -858.893297  | -858.874910  | -858.873966  | -858.941730  | 142.622 |
| 0602dab | Ph NMeBn | CHC CN CN | ZWion          | B3lyp631pd   | PCMdmsol     | TS           | HC           |         |
|         |          |           | -859.12909025  | -858.847639  | -858.829608  | -858.828663  | -858.895470  | 140.607 |
| 0603aaa | Ph NMeBn | CHC CN CN | ZWion          | B3lyp631pd   | PCMdmsol     |              |              |         |
|         |          |           | -859.18965374  | -858.902002  | -858.884403  | -858.883459  | -858.947798  | 135.413 |
| 0603aab | Ph NMeBn | CHC CN CN | ZWion          | B3lyp631pd   | PCMdmsol     |              |              |         |
|         |          |           | -859.15279040  | -858.866223  | -858.847565  | -858.846621  | -858.916973  | 148.069 |
| 0611aaa | Ph NMeBn | CHC CN CN | product        | B3lyp631pd   | PCMdmsol     |              |              |         |
|         |          |           | -859.18965381  | -858.902003  | -858.884404  | -858.883459  | -858.947800  | 135.416 |
| 0701aaa | Ph NMeBn | CHC CN Me | B3lyp631pd     | PCMdmsol     |              |              |              |         |
|         |          |           | -806.26130789  | -805.945869  | -805.927681  | -805.926737  | -805.993789  | 141.122 |
| 0702dab | Ph NMeBn | CHC CN Me | ZWion          | B3lyp631pd   | PCMdmsol     | TS           | CH           |         |
|         |          |           | -806.18870683  | -805.877520  | -805.859743  | -805.858799  | -805.924053  | 137.340 |
| 0702fab | Ph NMeBn | CHC CN Me | ZWion          | B3lyp631pd   | PCMdmsol     | SCAN         | CH           | vege    |
|         |          |           | -806.26131492  | -805.945794  | -805.927588  | -805.926644  | -805.993681  | 141.090 |
| 0703aab | Ph NMeBn | CHC CN Me | ZWion          | B3lyp631pd   | PCMdmsol     |              |              |         |
|         |          |           | -806.18973996  | -805.876113  | -805.857434  | -805.856489  | -805.925574  | 145.401 |
| 0711aaa | Ph NMeBn | CHC CN Me | product        | B3lyp631pd   | PCMdmsol     |              |              |         |
|         |          |           | -806.27872374  | -805.961301  | -805.944116  | -805.943172  | -806.006125  | 132.497 |
| 0801aaa | Ph NMeBn | CHC Me Me | B3lyp631pd     | PCMdmsol     |              |              |              |         |
|         |          |           | -753.33292195  | -752.988770  | -752.970782  | -752.969838  | -753.035812  | 138.854 |
| 0803aab | Ph NMeBn | CHC Me Me | ZWion          | B3lyp631pd   | PCMdmsol     |              |              |         |
|         |          |           | -753.22107840  | -752.881453  | -752.862880  | -752.861936  | -752.929596  | 142.404 |
| 0811aaa | Ph NMeBn | CHC Me Me | product        | B3lyp631pd   | PCMdmsol     |              |              |         |
|         |          |           | -753.35499607  | -753.008347  | -752.991587  | -752.990643  | -753.052268  | 129.702 |
| 0901aaa | Ph NMeBn | CHC COOMe | COOMe          | B3lyp631pd   | PCMdmsol     |              |              |         |
|         |          |           | -1130.45362422 | -1130.079616 | -1130.055432 | -1130.054488 | -1130.136764 | 173.164 |
| 0901aab | Ph NMeBn | CHC COOMe | COOMe          | B3lyp631pd   | PCMdmsol     |              |              |         |
|         |          |           | -1130.45457390 | -1130.080503 | -1130.056394 | -1130.055450 | -1130.137371 | 172.416 |
| 0902dab | Ph NMeBn | CHC COOMe | COOMe          | ZWion        | B3lyp631pd   | PCMdmsol     | TS           | CH      |
|         |          |           | -1130.39991971 | -1130.030567 | -1130.007073 | -1130.006129 | -1130.085277 | 166.580 |
| 0903aab | Ph NMeBn | CHC COOMe | COOMe          | ZWion        | B3lyp631pd   | PCMdmsol     |              |         |
|         |          |           | -1130.42968339 | -1130.055213 | -1130.031371 | -1130.030427 | -1130.110089 | 167.663 |
| 0911aaa | Ph NMeBn | CHC COOMe | COOMe          | product      | B3lyp631pd   | PCMdmsol     |              |         |
|         |          |           | -1130.46752131 | -1130.091567 | -1130.068350 | -1130.067406 | -1130.145115 | 163.551 |
| 1001aab | Ph NMeBn | CHC COOMe | H              | B3lyp631pd   | PCMdmsol     |              |              |         |
|         |          |           | -902.58196429  | -902.250440  | -902.231002  | -902.230058  | -902.300275  | 147.785 |
| 1002dab | Ph NMeBn | CHC COOMe | H              | ZWion        | B3lyp631pd   | PCMdmsol     | TS           | CH      |
|         |          |           | -902.51105131  | -902.181455  | -902.162532  | -902.161588  | -902.230608  | 145.266 |
| 1003aab | Ph NMeBn | CHC COOMe | H              | ZWion        | B3lyp631pd   | PCMdmsol     |              |         |
|         |          |           | -902.51223163  | -902.182557  | -902.162619  | -902.161675  | -902.234642  | 153.573 |
| 1011aaa | Ph NMeBn | CHC COOMe | H              | product      | B3lyp631pd   | PCMdmsol     |              |         |
|         |          |           | -902.60313583  | -902.269501  | -902.250785  | -902.249841  | -902.317968  | 143.386 |
| 1101aab | Ph NMeBn | CHC NO2   | NO2            | B3lyp631pd   | PCMdmsol     |              |              |         |
|         |          |           | -1083.67881727 | -1083.385392 | -1083.365325 | -1083.364380 | -1083.436926 | 152.685 |
| 1102dab | Ph NMeBn | CHC NO2   | NO2            | ZWion        | B3lyp631pd   | PCMdmsol     | TS           | CH      |
|         |          |           | -1083.66636212 | -1083.373799 | -1083.354335 | -1083.353391 | -1083.425065 | 150.850 |
| 1102fab | Ph NMeBn | CHC NO2   | NO2            | ZWion        | B3lyp631pd   | PCMdmsol     | SCAN         | CH      |
|         |          |           | -1083.67891225 | -1083.385597 | -1083.365394 | -1083.364450 | -1083.438406 | 155.653 |
| 1103aab | Ph NMeBn | CHC NO2   | NO2            | ZWion        | B3lyp631pd   | PCMdmsol     |              |         |
|         |          |           | -1083.68859337 | -1083.393996 | -1083.374175 | -1083.373231 | -1083.444418 | 149.826 |
| 1111aaa | Ph NMeBn | CHC NO2   | NO2            | product      | B3lyp631pd   | PCMdmsol     |              |         |
|         |          |           | -1083.69962861 | -1083.404209 | -1083.385002 | -1083.384058 | -1083.452649 | 144.361 |

**Table S6** Computed energies (E), zero point energies, internal energies (U), enthalpies (H) and Gibbs free energies (G) given in Hartree as well as entropies (S) given in J mol<sup>-1</sup> K<sup>-1</sup> at B3LYP/6-31G(d,p) basis set with the consideration of PCM solvent method using the parameter set of the solvent applied.

|         |                                                                     |  | E              | ZPE          | U            | H            | G            | S       |
|---------|---------------------------------------------------------------------|--|----------------|--------------|--------------|--------------|--------------|---------|
| 1201aab | Ph NMeBn CHC NO2 H B3lyp631pd_PCMdmso.log                           |  | -879.20166938  | -878.910353  | -878.892902  | -878.891957  | -878.957764  | 138.501 |
| 1202dab | Ph NMeBn CHC NO2 H ZWion B3lyp631pd_PCMdmso_TS_CH.log               |  | -879.14300488  | -878.856355  | -878.839411  | -878.838466  | -878.902612  | 135.006 |
| 1203aab | Ph NMeBn CHC NO2 H ZWion B3lyp631pd_PCMdmso.log                     |  | -879.16199851  | -878.870645  | -878.853125  | -878.852180  | -878.918258  | 139.071 |
| 1211aaa | Ph NMeBn CHC NO2 H_product B3lyp631pd_PCMdmso.log                   |  | -879.22688764  | -878.933080  | -878.916455  | -878.915511  | -878.978678  | 132.947 |
| 1301aab | Ph NMeBn CHC CF3 CF3 B3lyp631pd_PCMdmso.log                         |  | -1348.75910437 | -1348.460912 | -1348.438980 | -1348.438036 | -1348.514751 | 161.460 |
| 1302fab | Ph NMeBn CHC CF3 CF3_ZW_INT B3lyp631pd_PCMdmso_SCAN_CH_vege.log     |  | -1348.70863617 | -1348.411793 | -1348.389471 | -1348.388527 | -1348.466438 | 163.978 |
| 1311aaa | Ph NMeBn CHC CF3 CF3_product B3lyp631pd_PCMdmso.log                 |  | -1348.78089942 | -1348.480356 | -1348.459724 | -1348.458780 | -1348.529377 | 148.584 |
| 1313aab | Ph NMeBn CHC CF3 CF3_ZWion B3lyp631pd_PCMdmso.log                   |  | -1348.70863619 | -1348.411792 | -1348.389471 | -1348.388527 | -1348.466428 | 163.957 |
| 251aa   | model4 Naft Pirrolidin CN2 b3lyp631dp_PCMdmso.log                   |  | -859.18555497  | -858.897632  | -858.880157  | -858.879213  | -858.943912  | 136.170 |
| 253ab   | model4 Naft Pirrolidin CN2 b3lyp631dp_PCMdmso_TS_2.log              |  | -859.14921783  | -858.864630  | -858.847959  | -858.847015  | -858.909194  | 130.867 |
| 255ab   | model4 Naft Pirrolidin CN2_INT b3lyp631dp_PCMdmso.log               |  | -859.15880391  | -858.870661  | -858.853247  | -858.852303  | -858.916576  | 135.274 |
| 256aa   | model4 Naft Pirrolidin CN2_TERMEK1 b3lyp631dp_PCMdmso.log           |  | -859.20343316  | -858.912737  | -858.896556  | -858.895611  | -858.955699  | 126.465 |
| 256ab   | model4 Naft Pirrolidin CN2_TERMEK1 b3lyp631dp_PCMdmso.log           |  | -859.19331776  | -858.903001  | -858.886568  | -858.885624  | -858.946804  | 128.764 |
| 1401    | biphenyIO b3lyp631dp_PCMdmso.log                                    |  | -1011.81971457 | -1011.493576 | -1011.472806 | -1011.471862 | -1011.546255 | 156.573 |
| 1404    | biphenyIO_ZWINT b3lyp631dp_PCMdmso_TS_CH.log                        |  | -1011.77079408 | -1011.448847 | -1011.429093 | -1011.428149 | -1011.497896 | 146.794 |
| 1405    | biphenyIO_ZWINT b3lyp631dp_PCMdmso.log                              |  | -1011.79847607 | -1011.472592 | -1011.451901 | -1011.450957 | -1011.524884 | 155.593 |
| 1409    | biphenyIO_PRODUCT b3lyp631dp_PCMdmso.log                            |  | -1011.81134928 | -1011.483606 | -1011.464239 | -1011.463294 | -1011.530912 | 142.313 |
| 1411aab | biphenyIO_pyrrolidine CN2_PRODUCT b3lyp631dp_PCMdmso.log            |  | -1011.81661419 | -1011.488013 | -1011.468942 | -1011.467998 | -1011.534755 | 140.502 |
| 1501aaa | model2 PhPh_pyrrolidine CN2 b3lyp631dp_PCMdmso.log                  |  | -936.60548679  | -936.283335  | -936.263628  | -936.262684  | -936.333304  | 148.632 |
| 1504aaa | model2 PhPh_pyrrolidine CN2_TS b3lyp631dp_PCMdmso_f.log             |  | -936.56075759  | -936.242971  | -936.224099  | -936.223155  | -936.290691  | 142.141 |
| 1505aaa | model2 PhPh_pyrrolidine CN2_ZW_int b3lyp631dp_PCMdmso.log           |  | -936.58300659  | -936.261493  | -936.242421  | -936.241476  | -936.311295  | 146.946 |
| 1509aaa | model2 PhPh_pyrrolidine CN2_PRODUCTb3lyp631dp_PCMdmso.log           |  | -936.61301615  | -936.288916  | -936.270644  | -936.269700  | -936.334482  | 136.345 |
| 1509aab | model2 PhPh_pyrrolidine CN2_PRODUCTb3lyp631dp_PCMdmso.log           |  | -936.61301616  | -936.288916  | -936.270644  | -936.269700  | -936.334482  | 136.345 |
| 1509aac | model2 PhPh_pyrrolidine CN2_PRODUCTb3lyp631dp_PCMdmso.log           |  | -936.61369274  | -936.289193  | -936.270857  | -936.269913  | -936.335069  | 137.132 |
| 1601aab | model3 PhPhPh_pyrrolidine CN2 b3lyp631dp_PCMdmso.log                |  | -1167.66277625 | -1167.259990 | -1167.235554 | -1167.234610 | -1167.316540 | 172.436 |
| 1604aad | model3 PhPhPh_pyrrolidine CN2_ZW_int b3lyp631dp_PCMdmso_TS_CH_f.log |  | -1167.61799579 | -1167.219137 | -1167.195667 | -1167.194723 | -1167.272394 | 163.472 |
| 1605aad | model3 PhPhPh_pyrrolidine CN2_ZW_int b3lyp631dp_PCMdmso.log         |  | -1167.63698439 | -1167.234154 | -1167.209721 | -1167.208777 | -1167.290339 | 171.663 |
| 1609aaa | model3 PhPhPh_pyrrolidine CN2_PRODUCT b3lyp631dp_PCMdmso.log        |  | -1167.65003586 | -1167.245157 | -1167.222187 | -1167.221243 | -1167.296286 | 157.942 |
| 1511aab | model2 PhPh_pyrrolidine CN2_PRODUCT b3lyp631dp_PCMdmso.log          |  | -1167.65330832 | -1167.247762 | -1167.225026 | -1167.224082 | -1167.298540 | 156.711 |

**Table S7.** Computed energies (E), zero point energies, internal energies (U), enthalpies (H) and Gibbs free energies (G) given in Hartree as well as entropies (S) given in J mol<sup>-1</sup> K<sup>-1</sup> at B3LYP/6-31G(d,p) basis set with the consideration of PCM solvent method using the parameter set of the solvent applied.

|                                                                                |   | E              | ZPE          | U            | H            | G            | S       |
|--------------------------------------------------------------------------------|---|----------------|--------------|--------------|--------------|--------------|---------|
| 1701aaa_model3_NaphtPh_pyrrolidine_CN2_b3lyp631dp_PCMdmsol.log                 |   | -1090.24293570 | -1089.874138 | -1089.851792 | -1089.850848 | -1089.926963 | 160.197 |
| 1701aab_model3_NaphtPh_pyrrolidine_CN2_b3lyp631dp_PCMdmsol.log                 |   | -1090.24335168 | -1089.874540 | -1089.852208 | -1089.851264 | -1089.927103 | 159.618 |
| 1704aab_model3_NaphtPh_pyrrolidine_CN2_ZW_int_b3lyp631dp_PCMdmsol_TS_CH_f2.log |   | -1090.18615205 | -1089.821683 | -1089.800182 | -1089.799237 | -1089.872158 | 153.475 |
| 1705aab_model3_NaphtPh_pyrrolidine_CN2_ZW_int_b3lyp631dp_PCMdmsol.log          |   | -1090.21434501 | -1089.845334 | -1089.822960 | -1089.822016 | -1089.898925 | 161.869 |
| 1705aac_model3_NaphtPh_pyrrolidine_CN2_ZW_int_b3lyp631dp_PCMdmsol.log          |   | -1090.21644900 | -1089.847914 | -1089.825356 | -1089.824412 | -1089.902103 | 163.514 |
| 1705aad_model3_NaphtPh_pyrrolidine_CN2_ZW_int_b3lyp631dp_PCMdmsol.log          |   | -1090.21737876 | -1089.848224 | -1089.826150 | -1089.825206 | -1089.900137 | 157.707 |
| 1705aae_model3_NaphtPh_pyrrolidine_CN2_ZW_int_b3lyp631dp_PCMdmsol.log          |   | -1090.21364709 | -1089.845165 | -1089.822561 | -1089.821617 | -1089.899741 | 164.426 |
| 1709aab_model3_NaphtPh_pyrrolidine_CN2_PRODUCT_b3lyp631dp_PCMdmsol.log         |   | -1090.24534391 | -1089.873982 | -1089.852979 | -1089.852035 | -1089.922732 | 148.796 |
| 1709aac_model3_NaphtPh_pyrrolidine_CN2_PRODUCT_b3lyp631dp_PCMdmsol.log         |   | -1090.24534391 | -1089.873982 | -1089.852979 | -1089.852035 | -1089.922732 | 148.795 |
| 1709aad_model3_NaphtPh_pyrrolidine_CN2_PRODUCT_b3lyp631dp_PCMdmsol.log         |   | -1090.23880686 | -1089.868070 | -1089.847082 | -1089.846138 | -1089.917316 | 149.805 |
| 1801aaa_model4_PhOCH2Ph_pyrrolidine_CN2_b3lyp631dp_PCMdmsol.log                |   | -1051.13350096 | -1050.777781 | -1050.755805 | -1050.754861 | -1050.832736 | 163.902 |
| 1801aaa_model4_PhOCH2Ph_pyrrolidine_CN2_b3lyp631dp_TS_PCMdmsol.log             |   | -1051.08491500 | -1050.733132 | -1050.712933 | -1050.711989 | -1050.782042 | 147.438 |
| 1805aaa_model4_PhOCH2Ph_pyrrolidine_CN2_ZW_int_b3lyp631dp_PCMdmsol.log         |   | -1051.10618325 | -1050.751106 | -1050.728861 | -1050.727917 | -1050.806522 | 165.437 |
| 1809aaa_model4_PhOCH2Ph_pyrrolidine_CN2_PRODUCT_b3lyp631dp_PCMdmsol.log        |   | -1051.12552492 | -1050.768642 | -1050.748107 | -1050.747163 | -1050.817385 | 147.794 |
| 1809aab_model4_PhOCH2Ph_pyrrolidine_CN2_PRODUCT_b3lyp631dp_PCMdmsol.log        |   | -1051.11208096 | -1050.754143 | -1050.733897 | -1050.732953 | -1050.802077 | 145.484 |
| 1901aaa_model4_PhCH2OPh_pyrrolidine_CN2_b3lyp631dp_PCMdmsol.log                |   | -1051.12769505 | -1050.772474 | -1050.750401 | -1050.749457 | -1050.827299 | 163.833 |
| 1901aab_model4_PhCH2OPh_pyrrolidine_CN2_b3lyp631dp_PCMdmsol.log                |   | -1051.12728999 | -1050.772140 | -1050.750078 | -1050.749134 | -1050.826270 | 162.347 |
| 1904aaa_model4_PhCH2OPh_pyrrolidine_CN2_ZW_int_b3lyp631dp_PCMdmsol_TS_CH.log   |   | -1051.08808453 | -1050.736729 | -1050.715836 | -1050.714891 | -1050.787284 | 152.364 |
| 1905aaa_model4_PhCH2OPh_pyrrolidine_CN2_ZW_int_b3lyp631dp_PCMdmsol.log         |   | -1051.10931361 | -1050.753855 | -1050.731844 | -1050.730900 | -1050.807834 | 161.922 |
| 1909aaa_model4_PhCH2OPh_pyrrolidine_CN2_PRODUCT_b3lyp631dp_PCMdmsol.log        |   | -1051.12544975 | -1050.768202 | -1050.747768 | -1050.746823 | -1050.816673 | 147.011 |
| 1909aab_model4_PhCH2OPh_pyrrolidine_CN2_PRODUCT_b3lyp631dp_PCMdmsol.log        |   | -1051.10712043 | -1050.749488 | -1050.728975 | -1050.728031 | -1050.798837 | 149.024 |
| 0601aaa_Ph_NMeBn_CHC_CN_CN_B3lyp631pd_PCMdmsol.log                             |   | -859.17959000  | -858.893297  | -858.874910  | -858.873966  | -858.941730  | 142.622 |
| 0602bbb_Ph_NMeBn_CHC_CN_CN_ZWion_B3lyp631pd_PCMdmsol.log                       |   | -859.15297752  | -858.866507  | -858.847848  | -858.846904  | -858.917128  | 147.799 |
| 0602dcb_Ph_NMeBn_CHC_CN_CN_ZWion_B3lyp631pd_PCMdmsol_TS_HC_f.log               |   | -859.13536521  | -858.853650  | -858.835622  | -858.834678  | -858.901806  | 141.282 |
| 0603aaa_Ph_NMeBn_CHC_CN_CN_ZWion_B3lyp631pd_PCMdmsol.log                       |   | -859.18965374  | -858.902002  | -858.884403  | -858.883459  | -858.947798  | 135.413 |
| 0603aab_Ph_NMeBn_CHC_CN_CN_ZWion_B3lyp631pd_PCMdmsol.log                       |   | -859.15279040  | -858.866223  | -858.847565  | -858.846621  | -858.916973  | 148.069 |
| 0609aaa_Ph_NMeBn_CHC_CN_CN_product_B3lyp631pd_PCMdmsol.log                     |   | -859.18965381  | -858.902003  | -858.884404  | -858.883459  | -858.947800  | 135.416 |
| 0621aaa_Ph_NPiperidin_CHC_CN_CN_B3lyp631pd_PCMdmsol.log                        | 5 | -705.54644629  | -705.305045  | -705.289960  | -705.289016  | -705.349046  | 126.343 |
| 0623aba_Ph_NPiperidin_CHC_CN_CN_ZW_B3lyp631pd_PCMdmsol_TS_CH_vissza.log        |   | -705.50572761  | -705.268592  | -705.254341  | -705.253397  | -705.310885  | 120.994 |
| 0624aaa_Ph_NPiperidin_CHC_CN_CN_ZW_B3lyp631pd_PCMdmsol.log                     |   | -705.52552504  | -705.284402  | -705.269390  | -705.268446  | -705.328000  | 125.341 |
| 0629baa_Ph_NPiperidin_CHC_CN_CN_PRODUCT_B3lyp631pd_PCMdmsol.log                |   | -705.56515328  | -705.322102  | -705.308121  | -705.307177  | -705.362731  | 116.923 |
| 0631aaa_Ph_NPiperidin_CHC_CN_CN_B3lyp631pd_PCMdmsol.log                        | 6 | -744.86959462  | -744.598797  | -744.583070  | -744.582126  | -744.642739  | 127.572 |
| 0632aba_Ph_NPiperidin_CHC_CN_CN_ZW_B3lyp631pd_PCMdmsol_TS_CH.log               |   | -744.82492313  | -744.558431  | -744.543230  | -744.542286  | -744.601669  | 124.981 |
| 0634aaa_Ph_NPiperidin_CHC_CN_CN_ZW_B3lyp631pd_PCMdmsol.log                     |   | -744.84593632  | -744.575510  | -744.559455  | -744.558510  | -744.621191  | 131.923 |
| 0639baa_Ph_NPiperidin_CHC_CN_CN_PRODUCT_B3lyp631pd_PCMdmsol.log                |   | -744.87619096  | -744.603677  | -744.588883  | -744.587939  | -744.644947  | 119.983 |

**Table S8** Computed energies (E), zero point energies, internal energies (U), enthalpies (H) and Gibbs free energies (G) given in Hartree as well as entropies (S) given in J mol<sup>-1</sup> K<sup>-1</sup> at B3LYP/6-31G(d,p) basis set with the consideration of PCM solvent method using the parameter set of the solvent applied.

|                                                                  |         | E             | ZPE         | U           | H           | G           | S       |
|------------------------------------------------------------------|---------|---------------|-------------|-------------|-------------|-------------|---------|
| 0641aaa Ph NMorf CHC CN CN B3lyp631pd PCMdmsol.log               | 6       | -780.75674763 | -780.509823 | -780.494371 | -780.493427 | -780.553543 | 126.524 |
| 0643abb Ph NMorf CHC CN CN ZW B3lyp631pd PCMdmsol_TS_CH.log      |         | -780.70798076 | -780.465577 | -780.450617 | -780.449673 | -780.508806 | 124.457 |
| 0644aaa Ph NMorf CHC CN CN BZW 3lyp631pd PCMdmsol.log            |         | -780.72488686 | -780.478644 | -780.462917 | -780.461973 | -780.523545 | 129.591 |
| 0649aba Ph NMorf CHC CN CN PR 3lyp631pd PCMdmsol.log             |         | -780.76456759 | -780.515967 | -780.501461 | -780.500517 | -780.557087 | 119.061 |
| 0651aaa Ph NMeEt CHC CN CN B3lyp631pd PCMdmsol.log               |         | -667.43947154 | -667.206282 | -667.190892 | -667.189948 | -667.249503 | 125.345 |
| 0653aaa Ph NMeEt CHC CN CN ZW B3lyp631pd PCMdmsol_TS_CH.log      |         | -667.38953838 | -667.161014 | -667.146112 | -667.145168 | -667.203535 | 122.843 |
| 0654aaa Ph NMeEt CHC CN CN ZW B3lyp631pd PCMdmsol.log            |         | -667.41368925 | -667.180991 | -667.165256 | -667.164312 | -667.225357 | 128.480 |
| 0659aba Ph NMeEt CHC CN CN PR B3lyp631pd PCMdmsol.log            |         | -667.45096643 | -667.215713 | -667.201456 | -667.200512 | -667.256393 | 117.612 |
| 0661aaa Ph NMeBn CHC CN CN B3lyp631pd PCMw.log                   |         | -859.17979920 | -858.893504 | -858.875118 | -858.874174 | -858.941929 | 142.603 |
| 0601aaa Ph NMeBn CHC CN CN B3lyp631pd PCMdmsol.log               |         | -859.17959000 | -858.893297 | -858.874910 | -858.873966 | -858.941730 | 142.622 |
| 0661aaa Ph NMeBn CHC CN CN B3lyp631pd PCMacn.log                 |         | -859.17943006 | -858.893137 | -858.874749 | -858.873805 | -858.941577 | 142.639 |
| 0661aaa Ph NMeBn CHC CN CN B3lyp631pd PCMdce.log                 |         | -859.17783608 | -858.891567 | -858.873169 | -858.872225 | -858.940128 | 142.916 |
| 0661aaa Ph NMeBn CHC CN CN B3lyp631pd PCMtol.log                 |         | -859.17228082 | -858.886076 | -858.867642 | -858.866698 | -858.934992 | 143.737 |
| 0661aaa Ph NMeBn CHC CN CN B3lyp631pd.log                        |         | -859.16596983 | -858.879710 | -858.861292 | -858.860347 | -858.928536 | 143.516 |
| 0662dab Ph NMeBn CHC CN CN ZWion B3lyp631pd PCMw_TS_HC.log       | 78.3553 | -859.12943333 | -858.847988 | -858.829955 | -858.829011 | -858.895835 | 140.643 |
| 0602dab Ph NMeBn CHC CN CN ZWion B3lyp631pd PCMdmsol_TS_HC.log   | 46.826  | -859.12909025 | -858.847639 | -858.829608 | -858.828663 | -858.895470 | 140.607 |
| 0662dab Ph NMeBn CHC CN CN ZWion B3lyp631pd PCMacn_TS_HC.log     | 35.688  | -859.12882731 | -858.847372 | -858.829342 | -858.828398 | -858.895197 | 140.591 |
| 0662dab Ph NMeBn CHC CN CN ZWion B3lyp631pd PCMdce_TS_HC.log     | 10.125  | -859.12618681 | -858.844697 | -858.826674 | -858.825729 | -858.892498 | 140.525 |
| 0662dab Ph NMeBn CHC CN CN ZWion B3lyp631pd PCMtol_TS_HC.log     | 2.3741  | -859.13358659 | -858.847331 | -858.829762 | -858.828818 | -858.893706 | 136.569 |
| 0662dab Ph NMeBn CHC CN CN ZWion B3lyp631pd_TS_HC.log            | 1       | -859.10456045 | -858.822468 | -858.804457 | -858.803513 | -858.870395 | 140.766 |
| 0662eab Ph NMeBn CHC CN CN ZWion B3lyp631pd PCMw_TS_HC.log       | 78.3553 | -859.17256191 | -858.886547 | -858.868815 | -858.867871 | -858.933626 | 138.392 |
| 0602dcb Ph NMeBn CHC CN CN ZWion B3lyp631pd PCMdmsol_TS_HC f.log | 46.826  | -859.13536521 | -858.853650 | -858.835622 | -858.834678 | -858.901806 | 141.282 |
| 0662eab Ph NMeBn CHC CN CN ZWion B3lyp631pd PCMacn_TS_HC.log     | 35.688  | -859.13510796 | -858.853391 | -858.835362 | -858.834418 | -858.901579 | 141.354 |
| 0662eab Ph NMeBn CHC CN CN ZWion B3lyp631pd PCMdce_TS_HC f.log   | 10.125  | -859.13258184 | -858.850736 | -858.832794 | -858.831850 | -858.898451 | 140.173 |
| 0663bab Ph NMeBn CHC CN CN ZWion B3lyp631pd PCMw.log             |         | -859.15353706 | -858.866983 | -858.848317 | -858.847373 | -858.917835 | 148.300 |
| 0603aab Ph NMeBn CHC CN CN ZWion B3lyp631pd PCMdmsol.log         |         | -859.15279040 | -858.866223 | -858.847565 | -858.846621 | -858.916973 | 148.069 |
| 0663bab Ph NMeBn CHC CN CN ZWion B3lyp631pd PCMacn.log           |         | -859.15221608 | -858.865640 | -858.846987 | -858.846043 | -858.916327 | 147.926 |
| 0663bab Ph NMeBn CHC CN CN ZWion B3lyp631pd PCMdce.log           |         | -859.14635992 | -858.859748 | -858.841123 | -858.840179 | -858.910106 | 147.173 |
| 0663bab Ph NMeBn CHC CN CN ZWion B3lyp631pd PCMtol.log           |         | -859.13587176 | -858.849403 | -858.830945 | -858.830001 | -858.898029 | 143.177 |
| 0663bab Ph NMeBn CHC CN CN ZWion B3lyp631pd.log                  |         | -859.12655638 | -858.840913 | -858.822932 | -858.821987 | -858.888051 | 139.042 |

**Table S9** Computed energies (E), zero point energies, internal energies (U), enthalpies (H) and Gibbs free energies (G) given in Hartree as well as entropies (S) given in J mol<sup>-1</sup> K<sup>-1</sup> at B3LYP/6-31G(d,p) basis set with the consideration of PCM solvent method using the parameter set of the solvent applied.

|                                                                     | E             | ZPE         | U           | H           | G           | S       |
|---------------------------------------------------------------------|---------------|-------------|-------------|-------------|-------------|---------|
| 931aa_model1B_chexene_Me_CN2_b3lyp631dp_PCMw.log                    | -861.59775942 | -861.264715 | -861.245272 | -861.244328 | -861.314039 | 146.719 |
| 931aa_model1B_chexene_Me_CN2_b3lyp631dp_PCMdmsol.log                | -861.59742329 | -861.264386 | -861.244941 | -861.243996 | -861.313721 | 146.747 |
| 931aa_model1B_chexene_Me_CN2_b3lyp631dp_PCMacn.log                  | -861.59716693 | -861.264134 | -861.244687 | -861.243742 | -861.313482 | 146.779 |
| 931aa_model1B_chexene_Me_CN2_b3lyp631dp_PCMdce.log                  | -861.59465386 | -861.261653 | -861.242195 | -861.241250 | -861.311081 | 146.970 |
| 931aa_model1B_chexene_Me_CN2_b3lyp631dp_PCMtol.log                  | -861.58631368 | -861.253449 | -861.233927 | -861.232983 | -861.303189 | 147.761 |
| 931aa_model1B_chexene_Me_CN2_b3lyp631dp.log                         | -861.57743751 | -861.244553 | -861.225051 | -861.224107 | -861.294096 | 147.305 |
| 933aa_model1B_chexene_Ph_CN2_b3lyp631dp_PCMw_TS_CH.log              | -861.54522135 | -861.217631 | -861.198460 | -861.197515 | -861.266977 | 146.194 |
| 933aa_model1B_chexene_Ph_CN2_b3lyp631dp_PCMdmsol_TS_CH_f.log        | -861.54500341 | -861.217463 | -861.198272 | -861.197328 | -861.266844 | 146.309 |
| 933aa_model1B_chexene_Ph_CN2_b3lyp631dp_PCMacn_TS_CH.log            | -861.54475732 | -861.217198 | -861.198013 | -861.197069 | -861.266553 | 146.241 |
| 933aa_model1B_chexene_Ph_CN2_b3lyp631dp_PCMdce_TS_CH.log            | -861.54227236 | -861.214541 | -861.195409 | -861.194465 | -861.263608 | 145.523 |
| 933aa_model1B_chexene_Ph_CN2_b3lyp631dp_PCMtol_TS_CH.log            | -861.53328584 | -861.205202 | -861.186152 | -861.185208 | -861.254072 | 144.936 |
| 933aa_model1B_chexene_Ph_CN2_b3lyp631dp_TS_CH_f.log                 | -861.52276109 | -861.194336 | -861.175348 | -861.174404 | -861.242729 | 143.803 |
| 951aa_model1C_chexane_Ph_CN2_b3lyp631dp_PCMw.log                    | -862.80482442 | -862.449131 | -862.429244 | -862.428300 | -862.499700 | 150.274 |
| 951aa_model1C_chexane_Ph_CN2_b3lyp631dp_PCMdmsol.log                | -862.80463166 | -862.448931 | -862.429047 | -862.428103 | -862.499472 | 150.210 |
| 951aa_model1C_chexane_Ph_CN2_b3lyp631dp_PCMacn.log                  | -862.80448416 | -862.448777 | -862.428895 | -862.427951 | -862.499305 | 150.177 |
| 951aa_model1C_chexane_Ph_CN2_b3lyp631dp_PCMdce.log                  | -862.80301456 | -862.447265 | -862.427396 | -862.426452 | -862.497660 | 149.871 |
| 951aa_model1C_chexane_Ph_CN2_b3lyp631dp_PCMtol.log                  | -862.79786269 | -862.442099 | -862.422212 | -862.421268 | -862.492543 | 150.011 |
| 951aa_model1C_chexane_Ph_CN2_b3lyp631dp.log                         | -862.79192341 | -862.436195 | -862.416256 | -862.415312 | -862.486991 | 150.861 |
| 953aa_model1C_chexane_trans_Ph_CN2_b3lyp631dp_PCMdmsol_TS_CH_f2.log | -862.76180348 | -862.409736 | -862.390616 | -862.389671 | -862.458154 | 144.134 |
| 953aa_model1C_chexane_trans_Ph_CN2_b3lyp631dp_PCMacn_TS_CH.log      | -862.76153993 | -862.409474 | -862.390353 | -862.389408 | -862.457897 | 144.146 |
| 953aa_model1C_chexane_trans_Ph_CN2_b3lyp631dp_PCMdce_TS_CH_f2.log   | -862.75890022 | -862.406833 | -862.387703 | -862.386759 | -862.455258 | 144.169 |
| 953aa_model1C_chexane_trans_Ph_CN2_b3lyp631dp_PCMtol_TS_CH.log      | -862.74925720 | -862.397143 | -862.377991 | -862.377047 | -862.445713 | 144.521 |
| 953aa_model1C_chexane_trans_Ph_CN2_b3lyp631dp_TS_CH.log             | -862.73732726 | -862.384858 | -862.365728 | -862.364783 | -862.433440 | 144.499 |



## The xyz coordinates of computed geometries (for labeling see Table S3-S7)

0001aaa\_pentadiene\_B3LYP631dp\_PCMw.log

Standard orientation:

| Center<br>Number | Atomic<br>Number | Atomic<br>Type | Coordinates (Angstroms) |           |           |
|------------------|------------------|----------------|-------------------------|-----------|-----------|
|                  |                  |                | X                       | Y         | Z         |
| 1                | 6                | 0              | -1.192870               | 0.569669  | -0.110601 |
| 2                | 6                | 0              | 0.051433                | 1.082316  | -0.073874 |
| 3                | 1                | 0              | -2.003454               | 1.266583  | -0.321141 |
| 4                | 1                | 0              | 0.143961                | 2.158989  | -0.215997 |
| 5                | 6                | 0              | 1.321518                | 0.392797  | 0.186188  |
| 6                | 6                | 0              | 1.660667                | -0.859172 | -0.156921 |
| 7                | 1                | 0              | 2.074761                | 1.001748  | 0.688069  |
| 8                | 1                | 0              | 2.639260                | -1.259670 | 0.090579  |
| 9                | 1                | 0              | 0.994721                | -1.511168 | -0.712790 |
| 10               | 6                | 0              | -1.614056               | -0.849464 | 0.136774  |
| 11               | 1                | 0              | -1.806534               | -1.380269 | -0.805401 |
| 12               | 1                | 0              | -0.853318               | -1.415321 | 0.680961  |
| 13               | 1                | 0              | -2.549553               | -0.877770 | 0.706318  |

0001aba\_pentadiene\_B3LYP631dp\_PCMdmso.log

Standard orientation:

| Center<br>Number | Atomic<br>Number | Atomic<br>Type | Coordinates (Angstroms) |           |           |
|------------------|------------------|----------------|-------------------------|-----------|-----------|
|                  |                  |                | X                       | Y         | Z         |
| 1                | 6                | 0              | -1.192876               | 0.569600  | -0.110676 |
| 2                | 6                | 0              | 0.051393                | 1.082248  | -0.073813 |
| 3                | 1                | 0              | -2.003417               | 1.266467  | -0.321535 |
| 4                | 1                | 0              | 0.144002                | 2.158897  | -0.216050 |
| 5                | 6                | 0              | 1.321413                | 0.392720  | 0.186354  |
| 6                | 6                | 0              | 1.660811                | -0.859008 | -0.157267 |
| 7                | 1                | 0              | 2.074455                | 1.001558  | 0.688667  |
| 8                | 1                | 0              | 2.639380                | -1.259496 | 0.090339  |
| 9                | 1                | 0              | 0.995186                | -1.510765 | -0.713792 |
| 10               | 6                | 0              | -1.614087               | -0.849466 | 0.136995  |
| 11               | 1                | 0              | -1.806963               | -1.380340 | -0.805078 |
| 12               | 1                | 0              | -0.853184               | -1.415268 | 0.680995  |
| 13               | 1                | 0              | -2.549388               | -0.877615 | 0.706892  |

0001aca\_pentadiene\_B3LYP631dp\_PCMmecn.log

Standard orientation:

| Center<br>Number | Atomic<br>Number | Atomic<br>Type | Coordinates (Angstroms) |           |           |
|------------------|------------------|----------------|-------------------------|-----------|-----------|
|                  |                  |                | X                       | Y         | Z         |
| 1                | 6                | 0              | -1.192877               | 0.569578  | -0.110712 |
| 2                | 6                | 0              | 0.051372                | 1.082230  | -0.073821 |
| 3                | 1                | 0              | -2.003420               | 1.266420  | -0.321646 |
| 4                | 1                | 0              | 0.143975                | 2.158874  | -0.216093 |
| 5                | 6                | 0              | 1.321368                | 0.392709  | 0.186399  |
| 6                | 6                | 0              | 1.660830                | -0.858954 | -0.157341 |
| 7                | 1                | 0              | 2.074344                | 1.001495  | 0.688875  |
| 8                | 1                | 0              | 2.639372                | -1.259462 | 0.090323  |
| 9                | 1                | 0              | 0.995300                | -1.510616 | -0.714081 |
| 10               | 6                | 0              | -1.614056               | -0.849476 | 0.137058  |
| 11               | 1                | 0              | -1.806858               | -1.380452 | -0.804979 |
| 12               | 1                | 0              | -0.853156               | -1.415163 | 0.681178  |
| 13               | 1                | 0              | -2.549379               | -0.877620 | 0.706923  |

0001ada\_pentadiene\_B3LYP631dp\_PCMdce.log

Standard orientation:

| Center<br>Number | Atomic<br>Number | Atomic<br>Type | Coordinates (Angstroms) |           |           |
|------------------|------------------|----------------|-------------------------|-----------|-----------|
|                  |                  |                | X                       | Y         | Z         |
| 1                | 6                | 0              | -1.192779               | 0.569335  | -0.111604 |
| 2                | 6                | 0              | 0.051187                | 1.082158  | -0.074181 |
| 3                | 1                | 0              | -2.003404               | 1.265715  | -0.323786 |
| 4                | 1                | 0              | 0.143866                | 2.158676  | -0.217441 |
| 5                | 6                | 0              | 1.320609                | 0.392528  | 0.187750  |
| 6                | 6                | 0              | 1.660652                | -0.858173 | -0.158205 |
| 7                | 1                | 0              | 2.072275                | 1.000009  | 0.693774  |
| 8                | 1                | 0              | 2.638350                | -1.259810 | 0.090849  |
| 9                | 1                | 0              | 0.996248                | -1.507853 | -0.718527 |
| 10               | 6                | 0              | -1.613242               | -0.849689 | 0.137633  |
| 11               | 1                | 0              | -1.805235               | -1.382186 | -0.803743 |
| 12               | 1                | 0              | -0.851998               | -1.413580 | 0.683129  |
| 13               | 1                | 0              | -2.548662               | -0.877926 | 0.707393  |

0001aea\_pentadiene\_B3LYP631dp\_PCMtol.log

Standard orientation:

| Center<br>Number | Atomic<br>Number | Atomic<br>Type | Coordinates (Angstroms) |           |           |
|------------------|------------------|----------------|-------------------------|-----------|-----------|
|                  |                  |                | X                       | Y         | Z         |
| 1                | 6                | 0              | -1.192633               | 0.567950  | -0.115055 |
| 2                | 6                | 0              | 0.050520                | 1.081170  | -0.075735 |
| 3                | 1                | 0              | -2.003128               | 1.262570  | -0.333539 |
| 4                | 1                | 0              | 0.143846                | 2.157039  | -0.223677 |
| 5                | 6                | 0              | 1.318036                | 0.391342  | 0.194019  |
| 6                | 6                | 0              | 1.662547                | -0.854406 | -0.163037 |
| 7                | 1                | 0              | 2.062990                | 0.993587  | 0.716062  |
| 8                | 1                | 0              | 2.637068                | -1.259767 | 0.092045  |
| 9                | 1                | 0              | 1.004398                | -1.495886 | -0.739877 |
| 10               | 6                | 0              | -1.612251               | -0.850083 | 0.140787  |
| 11               | 1                | 0              | -1.812644               | -1.384747 | -0.797667 |
| 12               | 1                | 0              | -0.846906               | -1.412155 | 0.682160  |
| 13               | 1                | 0              | -2.542944               | -0.876485 | 0.718616  |

0001afa\_pentadiene\_B3LYP631dp\_vacuo.log

Standard orientation:

| Center<br>Number | Atomic<br>Number | Atomic<br>Type | Coordinates (Angstroms) |           |           |
|------------------|------------------|----------------|-------------------------|-----------|-----------|
|                  |                  |                | X                       | Y         | Z         |
| 1                | 6                | 0              | -1.192507               | 0.566586  | -0.118462 |
| 2                | 6                | 0              | 0.049775                | 1.080210  | -0.077062 |
| 3                | 1                | 0              | -2.002932               | 1.259423  | -0.342829 |
| 4                | 1                | 0              | 0.143643                | 2.155478  | -0.229085 |
| 5                | 6                | 0              | 1.315332                | 0.390196  | 0.199897  |
| 6                | 6                | 0              | 1.664319                | -0.850610 | -0.167597 |
| 7                | 1                | 0              | 2.053732                | 0.987154  | 0.737171  |
| 8                | 1                | 0              | 2.635739                | -1.259465 | 0.093248  |
| 9                | 1                | 0              | 1.012585                | -1.484136 | -0.760180 |
| 10               | 6                | 0              | -1.611028               | -0.850526 | 0.143706  |
| 11               | 1                | 0              | -1.819371               | -1.387590 | -0.791713 |
| 12               | 1                | 0              | -0.841644               | -1.410604 | 0.681188  |
| 13               | 1                | 0              | -2.537101               | -0.875389 | 0.729307  |

0001baa\_pentadiene\_TS\_b3lyp631dp\_PCMw.log

Standard orientation:

| Center<br>Number | Atomic<br>Number | Atomic<br>Type | Coordinates (Angstroms) |           |           |
|------------------|------------------|----------------|-------------------------|-----------|-----------|
|                  |                  |                | X                       | Y         | Z         |
| 1                | 6                | 0              | 1.211650                | 0.507912  | -0.012029 |
| 2                | 6                | 0              | -0.000328               | 1.184767  | 0.151236  |
| 3                | 1                | 0              | 2.045450                | 1.094931  | -0.395980 |
| 4                | 1                | 0              | -0.000547               | 2.269917  | 0.089046  |
| 5                | 6                | 0              | -1.212192               | 0.507322  | -0.012151 |
| 6                | 6                | 0              | -1.310343               | -0.906740 | -0.022357 |
| 7                | 1                | 0              | -2.046159               | 1.094023  | -0.396152 |
| 8                | 1                | 0              | -2.181755               | -1.329318 | -0.525247 |
| 9                | 1                | 0              | -1.062055               | -1.462840 | 0.879730  |
| 10               | 6                | 0              | 1.310907                | -0.906424 | -0.022680 |
| 11               | 1                | 0              | 1.063053                | -1.462444 | 0.879629  |
| 12               | 1                | 0              | 0.000129                | -1.197917 | -0.498684 |
| 13               | 1                | 0              | 2.183721                | -1.327377 | -0.524453 |

0001bba\_pentadiene\_TS\_b3lyp631dp\_PCMdmso.log

Standard orientation:

| Center<br>Number | Atomic<br>Number | Atomic<br>Type | Coordinates (Angstroms) |           |           |
|------------------|------------------|----------------|-------------------------|-----------|-----------|
|                  |                  |                | X                       | Y         | Z         |
| 1                | 6                | 0              | 1.211639                | 0.507789  | -0.012070 |
| 2                | 6                | 0              | -0.000264               | 1.184730  | 0.151343  |
| 3                | 1                | 0              | 2.045665                | 1.094731  | -0.395563 |
| 4                | 1                | 0              | -0.000400               | 2.269851  | 0.088925  |
| 5                | 6                | 0              | -1.211995               | 0.507426  | -0.012240 |
| 6                | 6                | 0              | -1.310482               | -0.906788 | -0.022510 |
| 7                | 1                | 0              | -2.046141               | 1.094034  | -0.395947 |
| 8                | 1                | 0              | -2.183031               | -1.328561 | -0.524041 |
| 9                | 1                | 0              | -1.061777               | -1.462645 | 0.879637  |
| 10               | 6                | 0              | 1.310878                | -0.906455 | -0.022742 |
| 11               | 1                | 0              | 1.062695                | -1.462804 | 0.879261  |
| 12               | 1                | 0              | 0.000183                | -1.197665 | -0.499003 |
| 13               | 1                | 0              | 2.184151                | -1.327154 | -0.523958 |

0001bca\_pentadiene\_TS\_b3lyp631dp\_PCMacn.log

Standard orientation:

| Center<br>Number | Atomic<br>Number | Atomic<br>Type | Coordinates (Angstroms) |           |           |
|------------------|------------------|----------------|-------------------------|-----------|-----------|
|                  |                  |                | X                       | Y         | Z         |
| 1                | 6                | 0              | 1.211350                | 0.508137  | -0.011886 |
| 2                | 6                | 0              | -0.000739               | 1.184712  | 0.151166  |
| 3                | 1                | 0              | 2.045415                | 1.095555  | -0.394584 |
| 4                | 1                | 0              | -0.001151               | 2.269866  | 0.089288  |
| 5                | 6                | 0              | -1.212404               | 0.507069  | -0.012453 |
| 6                | 6                | 0              | -1.310152               | -0.907090 | -0.022261 |
| 7                | 1                | 0              | -2.046680               | 1.093379  | -0.396320 |
| 8                | 1                | 0              | -2.182418               | -1.329853 | -0.523405 |
| 9                | 1                | 0              | -1.060471               | -1.462346 | 0.879992  |
| 10               | 6                | 0              | 1.311273                | -0.906138 | -0.022986 |
| 11               | 1                | 0              | 1.063766                | -1.462917 | 0.878973  |
| 12               | 1                | 0              | 0.000626                | -1.197817 | -0.499191 |
| 13               | 1                | 0              | 2.184947                | -1.326011 | -0.524232 |

0001bda\_pentadiene\_TS\_b3lyp631dp\_PCMdce.log

Standard orientation:

| Center<br>Number | Atomic<br>Number | Atomic<br>Type | Coordinates (Angstroms) |           |           |
|------------------|------------------|----------------|-------------------------|-----------|-----------|
|                  |                  |                | X                       | Y         | Z         |
| 1                | 6                | 0              | 1.211252                | 0.508083  | -0.011942 |
| 2                | 6                | 0              | -0.000710               | 1.184622  | 0.151126  |
| 3                | 1                | 0              | 2.045307                | 1.095371  | -0.394845 |
| 4                | 1                | 0              | -0.001119               | 2.269777  | 0.089421  |
| 5                | 6                | 0              | -1.212270               | 0.507035  | -0.012424 |
| 6                | 6                | 0              | -1.309972               | -0.907033 | -0.022322 |
| 7                | 1                | 0              | -2.046617               | 1.093303  | -0.396190 |
| 8                | 1                | 0              | -2.182170               | -1.329868 | -0.523500 |
| 9                | 1                | 0              | -1.060649               | -1.461931 | 0.880255  |
| 10               | 6                | 0              | 1.311049                | -0.906109 | -0.022949 |
| 11               | 1                | 0              | 1.063789                | -1.462348 | 0.879417  |
| 12               | 1                | 0              | 0.000682                | -1.197706 | -0.499427 |
| 13               | 1                | 0              | 2.184680                | -1.326186 | -0.524070 |

0001bea\_pentadiene\_TS\_b3lyp631dp\_PCMtol.log

Standard orientation:

| Center<br>Number | Atomic<br>Number | Atomic<br>Type | Coordinates (Angstroms) |           |           |
|------------------|------------------|----------------|-------------------------|-----------|-----------|
|                  |                  |                | X                       | Y         | Z         |
| 1                | 6                | 0              | 1.210872                | 0.507941  | -0.012046 |
| 2                | 6                | 0              | -0.000700               | 1.184321  | 0.150992  |
| 3                | 1                | 0              | 2.045006                | 1.094969  | -0.395112 |
| 4                | 1                | 0              | -0.001094               | 2.269478  | 0.089854  |
| 5                | 6                | 0              | -1.211883               | 0.506901  | -0.012447 |
| 6                | 6                | 0              | -1.309328               | -0.906897 | -0.022425 |
| 7                | 1                | 0              | -2.046392               | 1.092957  | -0.396122 |
| 8                | 1                | 0              | -2.181394               | -1.330139 | -0.523393 |
| 9                | 1                | 0              | -1.061073               | -1.460372 | 0.881336  |
| 10               | 6                | 0              | 1.310398                | -0.905967 | -0.022967 |
| 11               | 1                | 0              | 1.064091                | -1.460652 | 0.880635  |
| 12               | 1                | 0              | 0.000733                | -1.197506 | -0.500140 |
| 13               | 1                | 0              | 2.183964                | -1.326525 | -0.523699 |

0001bfa\_pentadiene\_TS\_b3lyp631dp\_vacuo.log

Standard orientation:

| Center<br>Number | Atomic<br>Number | Atomic<br>Type | Coordinates (Angstroms) |           |           |
|------------------|------------------|----------------|-------------------------|-----------|-----------|
|                  |                  |                | X                       | Y         | Z         |
| 1                | 6                | 0              | 1.210736                | 0.507575  | -0.012390 |
| 2                | 6                | 0              | -0.000293               | 1.184153  | 0.151131  |
| 3                | 1                | 0              | 2.044904                | 1.093939  | -0.396401 |
| 4                | 1                | 0              | -0.000432               | 2.269330  | 0.090692  |
| 5                | 6                | 0              | -1.211122               | 0.507167  | -0.012519 |
| 6                | 6                | 0              | -1.308631               | -0.906647 | -0.022679 |
| 7                | 1                | 0              | -2.045510               | 1.093178  | -0.396551 |
| 8                | 1                | 0              | -2.180719               | -1.329966 | -0.523543 |
| 9                | 1                | 0              | -1.063290               | -1.458387 | 0.883009  |
| 10               | 6                | 0              | 1.309066                | -0.906263 | -0.022861 |
| 11               | 1                | 0              | 1.064228                | -1.458458 | 0.882705  |
| 12               | 1                | 0              | 0.000313                | -1.197045 | -0.500727 |
| 13               | 1                | 0              | 2.181964                | -1.328499 | -0.523278 |

0101aaa\_Ph\_NMeBn\_CHC\_H\_CN\_B3lyp631pd\_PCMdmsol.log

Standard orientation:

| Center<br>Number | Atomic<br>Number | Atomic<br>Type | Coordinates (Angstroms) |           |           |
|------------------|------------------|----------------|-------------------------|-----------|-----------|
|                  |                  |                | X                       | Y         | Z         |
| 1                | 6                | 0              | 4.433556                | -0.078016 | 0.218320  |
| 2                | 6                | 0              | 3.406894                | 0.856461  | 0.169537  |
| 3                | 6                | 0              | 2.065339                | 0.472161  | -0.016300 |

|    |   |   |           |           |           |
|----|---|---|-----------|-----------|-----------|
| 4  | 6 | 0 | 1.749871  | -0.915242 | -0.123031 |
| 5  | 6 | 0 | 2.805235  | -1.844285 | -0.094537 |
| 6  | 6 | 0 | 4.125545  | -1.432891 | 0.070927  |
| 7  | 1 | 0 | 5.461554  | 0.245223  | 0.344773  |
| 8  | 1 | 0 | 3.647134  | 1.913527  | 0.223230  |
| 9  | 1 | 0 | 2.592966  | -2.902952 | -0.177435 |
| 10 | 1 | 0 | 4.915082  | -2.178185 | 0.095750  |
| 11 | 7 | 0 | 0.406198  | -1.327609 | -0.279800 |
| 12 | 6 | 0 | -0.517495 | -1.017664 | 0.824188  |
| 13 | 1 | 0 | -0.146142 | -0.131483 | 1.346116  |
| 14 | 1 | 0 | -0.502393 | -1.833425 | 1.566216  |
| 15 | 6 | 0 | 0.186362  | -2.671158 | -0.814192 |
| 16 | 1 | 0 | -0.864407 | -2.766625 | -1.095012 |
| 17 | 1 | 0 | 0.794597  | -2.824219 | -1.707850 |
| 18 | 1 | 0 | 0.414317  | -3.466541 | -0.087127 |
| 19 | 6 | 0 | -1.955179 | -0.769564 | 0.394472  |
| 20 | 6 | 0 | -2.979057 | -0.906576 | 1.342459  |
| 21 | 6 | 0 | -2.291885 | -0.363556 | -0.902382 |
| 22 | 6 | 0 | -4.304637 | -0.629551 | 1.008006  |
| 23 | 1 | 0 | -2.734824 | -1.231893 | 2.350995  |
| 24 | 6 | 0 | -3.620066 | -0.092166 | -1.242015 |
| 25 | 1 | 0 | -1.510629 | -0.276176 | -1.651008 |
| 26 | 6 | 0 | -4.630415 | -0.220126 | -0.287981 |
| 27 | 1 | 0 | -5.083776 | -0.739819 | 1.756742  |
| 28 | 1 | 0 | -3.862887 | 0.217456  | -2.254498 |
| 29 | 1 | 0 | -5.662617 | -0.009709 | -0.551746 |
| 30 | 6 | 0 | 1.021180  | 1.476488  | -0.191896 |
| 31 | 6 | 0 | 1.061379  | 2.755252  | 0.250202  |
| 32 | 1 | 0 | 0.142250  | 1.152482  | -0.742282 |
| 33 | 1 | 0 | 1.882732  | 3.137381  | 0.849159  |
| 34 | 6 | 0 | 0.018632  | 3.680318  | -0.032779 |
| 35 | 7 | 0 | -0.825416 | 4.455559  | -0.249345 |

0101aaa\_Ph\_NMeBn\_CHC\_H\_CN\_ZW\_INT\_B3lyp631pd\_PCMdms0.log

Standard orientation:

| Center Number | Atomic Number | Atomic Type | Coordinates (Angstroms) |           |           |
|---------------|---------------|-------------|-------------------------|-----------|-----------|
|               |               |             | X                       | Y         | Z         |
| 1             | 6             | 0           | -4.126570               | -1.135888 | 0.598055  |
| 2             | 6             | 0           | -3.344393               | 0.009047  | 0.676329  |
| 3             | 6             | 0           | -1.972844               | -0.004899 | 0.370348  |
| 4             | 6             | 0           | -1.418626               | -1.231574 | -0.045145 |
| 5             | 6             | 0           | -2.206978               | -2.391287 | -0.150978 |
| 6             | 6             | 0           | -3.554267               | -2.343865 | 0.173889  |
| 7             | 1             | 0           | -5.178286               | -1.094733 | 0.863890  |
| 8             | 1             | 0           | -3.788204               | 0.955795  | 0.971519  |
| 9             | 1             | 0           | -1.753485               | -3.327674 | -0.458633 |
| 10            | 1             | 0           | -4.156192               | -3.244581 | 0.109102  |
| 11            | 7             | 0           | -0.022431               | -1.298472 | -0.376535 |
| 12            | 6             | 0           | 0.836178                | -0.732922 | 0.474311  |
| 13            | 1             | 0           | 0.464488                | -0.662499 | 1.490933  |
| 14            | 6             | 0           | 0.349125                | -1.816971 | -1.701324 |
| 15            | 1             | 0           | 1.366748                | -2.203169 | -1.673874 |
| 16            | 1             | 0           | -0.332057               | -2.625312 | -1.960210 |
| 17            | 1             | 0           | 0.263287                | -1.037221 | -2.463595 |
| 18            | 6             | 0           | 2.229691                | -0.393536 | 0.279828  |
| 19            | 6             | 0           | 3.021013                | -0.313703 | 1.450838  |
| 20            | 6             | 0           | 2.835600                | -0.091600 | -0.962378 |
| 21            | 6             | 0           | 4.368845                | 0.014585  | 1.380043  |
| 22            | 1             | 0           | 2.565462                | -0.522669 | 2.414197  |
| 23            | 6             | 0           | 4.182933                | 0.247037  | -1.021659 |
| 24            | 1             | 0           | 2.252733                | -0.083414 | -1.873975 |
| 25            | 6             | 0           | 4.957020                | 0.292664  | 0.142205  |
| 26            | 1             | 0           | 4.960826                | 0.059202  | 2.288441  |
| 27            | 1             | 0           | 4.630619                | 0.484981  | -1.981217 |
| 28            | 1             | 0           | 6.008780                | 0.554402  | 0.085427  |
| 29            | 6             | 0           | -1.202876               | 1.305565  | 0.410679  |
| 30            | 6             | 0           | -1.655366               | 2.254738  | -0.634421 |
| 31            | 1             | 0           | -1.310149               | 1.748430  | 1.408502  |
| 32            | 1             | 0           | -1.797442               | 1.892877  | -1.647749 |
| 33            | 6             | 0           | -1.767000               | 3.613780  | -0.408405 |
| 34            | 7             | 0           | -1.874803               | 4.776436  | -0.210800 |
| 35            | 1             | 0           | -0.105382               | 1.072794  | 0.345294  |

-----  
0101daa\_Ph\_NMeBn\_CHC\_H\_CN\_ZW\_INT\_B3lyp631pd\_PCMDmso\_TS\_CH.log

Standard orientation:

| Center<br>Number | Atomic<br>Number | Atomic<br>Type | Coordinates (Angstroms) |           |           |
|------------------|------------------|----------------|-------------------------|-----------|-----------|
|                  |                  |                | X                       | Y         | Z         |
| 1                | 6                | 0              | 4.324258                | -0.587308 | -0.407184 |
| 2                | 6                | 0              | 3.378944                | 0.427828  | -0.497971 |
| 3                | 6                | 0              | 2.008777                | 0.177096  | -0.327343 |
| 4                | 6                | 0              | 1.611425                | -1.144585 | -0.026046 |
| 5                | 6                | 0              | 2.566792                | -2.170197 | 0.084894  |
| 6                | 6                | 0              | 3.912955                | -1.892697 | -0.108541 |
| 7                | 1                | 0              | 5.375009                | -0.368316 | -0.569070 |
| 8                | 1                | 0              | 3.687966                | 1.448763  | -0.703769 |
| 9                | 1                | 0              | 2.249761                | -3.184165 | 0.302671  |
| 10               | 1                | 0              | 4.641676                | -2.693839 | -0.035111 |
| 11               | 7                | 0              | 0.230509                | -1.418699 | 0.199366  |
| 12               | 6                | 0              | -0.649006               | -0.731378 | -0.575773 |
| 13               | 1                | 0              | -0.337532               | -0.642608 | -1.613975 |
| 14               | 6                | 0              | -0.149918               | -2.156567 | 1.410016  |
| 15               | 1                | 0              | -1.177650               | -2.502539 | 1.316643  |
| 16               | 1                | 0              | 0.499024                | -3.025585 | 1.513718  |
| 17               | 1                | 0              | -0.047260               | -1.539850 | 2.308865  |
| 18               | 6                | 0              | -2.072125               | -0.539571 | -0.320745 |
| 19               | 6                | 0              | -2.934475               | -0.508158 | -1.438091 |
| 20               | 6                | 0              | -2.620705               | -0.305063 | 0.959126  |
| 21               | 6                | 0              | -4.298872               | -0.288363 | -1.279117 |
| 22               | 1                | 0              | -2.524534               | -0.668499 | -2.430920 |
| 23               | 6                | 0              | -3.985610               | -0.079257 | 1.109663  |
| 24               | 1                | 0              | -1.978762               | -0.268684 | 1.831245  |
| 25               | 6                | 0              | -4.831023               | -0.077023 | -0.004013 |
| 26               | 1                | 0              | -4.947304               | -0.279485 | -2.149539 |
| 27               | 1                | 0              | -4.390500               | 0.104933  | 2.099809  |
| 28               | 1                | 0              | -5.894998               | 0.097928  | 0.120682  |
| 29               | 6                | 0              | 1.031711                | 1.332445  | -0.390311 |
| 30               | 6                | 0              | 1.229579                | 2.360471  | 0.615748  |
| 31               | 1                | 0              | 0.978790                | 1.742459  | -1.406366 |
| 32               | 1                | 0              | 1.529598                | 2.076319  | 1.619213  |
| 33               | 6                | 0              | 0.888063                | 3.691139  | 0.399419  |
| 34               | 7                | 0              | 0.611990                | 4.822897  | 0.214536  |
| 35               | 1                | 0              | -0.025402               | 0.820905  | -0.323821 |

-----  
0108aaa\_Ph\_NMeBn\_CHC\_H\_CN\_product\_B3lyp631pd\_PCMDmso.log

Standard orientation:

| Center<br>Number | Atomic<br>Number | Atomic<br>Type | Coordinates (Angstroms) |           |           |
|------------------|------------------|----------------|-------------------------|-----------|-----------|
|                  |                  |                | X                       | Y         | Z         |
| 1                | 6                | 0              | 4.663290                | -0.211574 | -0.284316 |
| 2                | 6                | 0              | 3.765362                | 0.850640  | -0.281794 |
| 3                | 6                | 0              | 2.386771                | 0.646668  | -0.118538 |
| 4                | 6                | 0              | 1.902744                | -0.667641 | 0.027306  |
| 5                | 6                | 0              | 2.816592                | -1.739232 | 0.019832  |
| 6                | 6                | 0              | 4.179939                | -1.515720 | -0.126761 |
| 7                | 1                | 0              | 5.726228                | -0.028454 | -0.407083 |
| 8                | 1                | 0              | 4.132292                | 1.868196  | -0.393960 |
| 9                | 1                | 0              | 2.439278                | -2.753135 | 0.110732  |
| 10               | 1                | 0              | 4.864773                | -2.358594 | -0.133279 |
| 11               | 7                | 0              | 0.512982                | -0.943498 | 0.161139  |
| 12               | 6                | 0              | -0.367073               | 0.137178  | -0.313313 |
| 13               | 1                | 0              | -0.134883               | 0.267621  | -1.377257 |
| 14               | 6                | 0              | 0.124924                | -1.605472 | 1.413955  |
| 15               | 1                | 0              | -0.853344               | -2.074926 | 1.304139  |
| 16               | 1                | 0              | 0.851268                | -2.384403 | 1.644589  |
| 17               | 1                | 0              | 0.087108                | -0.919031 | 2.275210  |
| 18               | 6                | 0              | -1.838541               | -0.238739 | -0.226639 |
| 19               | 6                | 0              | -2.649285               | 0.091544  | 0.867588  |
| 20               | 6                | 0              | -2.403466               | -0.963425 | -1.285378 |
| 21               | 6                | 0              | -3.992154               | -0.290510 | 0.899754  |
| 22               | 1                | 0              | -2.240838               | 0.646911  | 1.706286  |
| 23               | 6                | 0              | -3.743516               | -1.349477 | -1.254969 |

|    |   |   |           |           |           |
|----|---|---|-----------|-----------|-----------|
| 24 | 1 | 0 | -1.785529 | -1.225281 | -2.140150 |
| 25 | 6 | 0 | -4.543058 | -1.011953 | -0.160494 |
| 26 | 1 | 0 | -4.605596 | -0.023570 | 1.755024  |
| 27 | 1 | 0 | -4.163419 | -1.907478 | -2.086541 |
| 28 | 1 | 0 | -5.587790 | -1.306882 | -0.135525 |
| 29 | 6 | 0 | 1.460780  | 1.845352  | -0.104475 |
| 30 | 6 | 0 | 0.036385  | 1.483826  | 0.375164  |
| 31 | 1 | 0 | 1.876492  | 2.634617  | 0.529715  |
| 32 | 1 | 0 | 0.036198  | 1.342455  | 1.462544  |
| 33 | 6 | 0 | -0.882237 | 2.584036  | 0.076117  |
| 34 | 7 | 0 | -1.589502 | 3.469588  | -0.180786 |
| 35 | 1 | 0 | 1.388653  | 2.266320  | -1.115144 |

0108baa\_Ph\_NMeBn\_CHC\_H\_CN\_product\_B3lyp631pd\_PCMdmsol.log

Standard orientation:

| Center<br>Number | Atomic<br>Number | Atomic<br>Type | Coordinates (Angstroms) |           |           |
|------------------|------------------|----------------|-------------------------|-----------|-----------|
|                  |                  |                | X                       | Y         | Z         |
| 1                | 6                | 0              | 4.535231                | -0.513936 | -0.318231 |
| 2                | 6                | 0              | 3.684933                | 0.447586  | -0.855017 |
| 3                | 6                | 0              | 2.298994                | 0.407050  | -0.647600 |
| 4                | 6                | 0              | 1.747752                | -0.648528 | 0.114005  |
| 5                | 6                | 0              | 2.617703                | -1.613882 | 0.661112  |
| 6                | 6                | 0              | 3.989664                | -1.547169 | 0.450539  |
| 7                | 1                | 0              | 5.605562                | -0.457202 | -0.489749 |
| 8                | 1                | 0              | 4.097957                | 1.266472  | -1.439652 |
| 9                | 1                | 0              | 2.206617                | -2.434495 | 1.238966  |
| 10               | 1                | 0              | 4.633211                | -2.309673 | 0.879755  |
| 11               | 7                | 0              | 0.351211                | -0.763323 | 0.322431  |
| 12               | 6                | 0              | -0.473071               | 0.058317  | -0.577339 |
| 13               | 1                | 0              | -0.248533               | -0.304302 | -1.589406 |
| 14               | 6                | 0              | -0.090095               | -0.953048 | 1.711185  |
| 15               | 1                | 0              | -1.168201               | -1.107511 | 1.730680  |
| 16               | 1                | 0              | 0.373806                | -1.848146 | 2.128356  |
| 17               | 1                | 0              | 0.156061                | -0.103128 | 2.361341  |
| 18               | 6                | 0              | -1.967034               | -0.160085 | -0.386230 |
| 19               | 6                | 0              | -2.839044               | 0.819513  | 0.101607  |
| 20               | 6                | 0              | -2.497048               | -1.407668 | -0.753087 |
| 21               | 6                | 0              | -4.207649               | 0.558573  | 0.222162  |
| 22               | 1                | 0              | -2.466312               | 1.794366  | 0.396761  |
| 23               | 6                | 0              | -3.859357               | -1.671753 | -0.628918 |
| 24               | 1                | 0              | -1.829556               | -2.174815 | -1.136026 |
| 25               | 6                | 0              | -4.721644               | -0.685598 | -0.140376 |
| 26               | 1                | 0              | -4.868178               | 1.332526  | 0.601386  |
| 27               | 1                | 0              | -4.249535               | -2.642554 | -0.919820 |
| 28               | 1                | 0              | -5.784620               | -0.886496 | -0.046874 |
| 29               | 6                | 0              | 1.436580                | 1.508001  | -1.234312 |
| 30               | 6                | 0              | 0.018099                | 1.538648  | -0.621085 |
| 31               | 1                | 0              | 1.928094                | 2.477872  | -1.111774 |
| 32               | 1                | 0              | -0.641388               | 2.123940  | -1.270737 |
| 33               | 6                | 0              | 0.024314                | 2.199899  | 0.689473  |
| 34               | 7                | 0              | 0.041903                | 2.748759  | 1.713758  |
| 35               | 1                | 0              | 1.313246                | 1.359572  | -2.313854 |

0201aaa\_Ph\_NMeBn\_CHC\_Me\_COOMe\_B3lyp631pd\_PCMdmsol.log

Standard orientation:

| Center<br>Number | Atomic<br>Number | Atomic<br>Type | Coordinates (Angstroms) |           |           |
|------------------|------------------|----------------|-------------------------|-----------|-----------|
|                  |                  |                | X                       | Y         | Z         |
| 1                | 6                | 0              | 4.560300                | -0.396355 | -0.051380 |
| 2                | 6                | 0              | 3.487604                | 0.490881  | -0.014528 |
| 3                | 6                | 0              | 2.156191                | 0.049489  | -0.116818 |
| 4                | 6                | 0              | 1.905098                | -1.349092 | -0.243825 |
| 5                | 6                | 0              | 2.999110                | -2.229433 | -0.288125 |
| 6                | 6                | 0              | 4.309213                | -1.760578 | -0.196081 |
| 7                | 1                | 0              | 5.577851                | -0.023999 | 0.011177  |
| 8                | 1                | 0              | 3.681745                | 1.556373  | 0.036338  |
| 9                | 1                | 0              | 2.829943                | -3.295388 | -0.379419 |
| 10               | 1                | 0              | 5.131886                | -2.468973 | -0.229891 |
| 11               | 7                | 0              | 0.570883                | -1.818112 | -0.353780 |

|    |   |   |           |           |           |
|----|---|---|-----------|-----------|-----------|
| 12 | 6 | 0 | -0.294198 | -1.592913 | 0.816946  |
| 13 | 1 | 0 | 0.013613  | -0.657784 | 1.292148  |
| 14 | 1 | 0 | -0.133458 | -2.387351 | 1.565480  |
| 15 | 6 | 0 | 0.393441  | -3.157777 | -0.911723 |
| 16 | 1 | 0 | -0.662467 | -3.300081 | -1.150282 |
| 17 | 1 | 0 | 0.969920  | -3.259087 | -1.833521 |
| 18 | 1 | 0 | 0.691928  | -3.959427 | -0.216885 |
| 19 | 6 | 0 | -1.778051 | -1.512609 | 0.496604  |
| 20 | 6 | 0 | -2.709494 | -1.890160 | 1.473230  |
| 21 | 6 | 0 | -2.251548 | -1.022482 | -0.727153 |
| 22 | 6 | 0 | -4.080406 | -1.766918 | 1.241372  |
| 23 | 1 | 0 | -2.357669 | -2.283792 | 2.423917  |
| 24 | 6 | 0 | -3.622795 | -0.906657 | -0.965639 |
| 25 | 1 | 0 | -1.540036 | -0.747020 | -1.498637 |
| 26 | 6 | 0 | -4.542527 | -1.273983 | 0.018857  |
| 27 | 1 | 0 | -4.786346 | -2.063940 | 2.011651  |
| 28 | 1 | 0 | -3.971946 | -0.530423 | -1.923116 |
| 29 | 1 | 0 | -5.608727 | -1.183712 | -0.166908 |
| 30 | 6 | 0 | 1.046916  | 1.001541  | -0.236047 |
| 31 | 6 | 0 | 0.880276  | 2.193141  | 0.385928  |
| 32 | 1 | 0 | 0.264386  | 0.689676  | -0.920967 |
| 33 | 6 | 0 | 1.762316  | 2.761673  | 1.467982  |
| 34 | 1 | 0 | 2.374979  | 1.986661  | 1.931052  |
| 35 | 1 | 0 | 2.434274  | 3.536738  | 1.078986  |
| 36 | 1 | 0 | 1.147480  | 3.238417  | 2.235314  |
| 37 | 6 | 0 | -0.293328 | 3.043191  | 0.041795  |
| 38 | 8 | 0 | -0.558905 | 4.092050  | 0.610875  |
| 39 | 8 | 0 | -1.050496 | 2.558215  | -0.968019 |
| 40 | 6 | 0 | -2.208839 | 3.338209  | -1.310704 |
| 41 | 1 | 0 | -2.696026 | 2.798421  | -2.121640 |
| 42 | 1 | 0 | -2.881903 | 3.426679  | -0.454809 |
| 43 | 1 | 0 | -1.916058 | 4.337664  | -1.640513 |

0202aaa\_Ph\_NMeBn\_CHC\_Me\_COOMe\_ZW\_INT\_B3lyp631pd\_PCMDmsolo.log

Standard orientation:

| Center<br>Number | Atomic<br>Number | Atomic<br>Type | Coordinates (Angstroms) |           |           |
|------------------|------------------|----------------|-------------------------|-----------|-----------|
|                  |                  |                | X                       | Y         | Z         |
| 1                | 6                | 0              | -2.434594               | 3.394255  | -0.711635 |
| 2                | 6                | 0              | -2.279876               | 2.027492  | -0.911433 |
| 3                | 6                | 0              | -1.106084               | 1.348806  | -0.541130 |
| 4                | 6                | 0              | -0.093806               | 2.115346  | 0.064222  |
| 5                | 6                | 0              | -0.243897               | 3.493294  | 0.291099  |
| 6                | 6                | 0              | -1.411693               | 4.132562  | -0.100158 |
| 7                | 1                | 0              | -3.347086               | 3.889063  | -1.029959 |
| 8                | 1                | 0              | -3.082928               | 1.448176  | -1.358852 |
| 9                | 1                | 0              | 0.563262                | 4.055112  | 0.750322  |
| 10               | 1                | 0              | -1.522657               | 5.200336  | 0.058915  |
| 11               | 7                | 0              | 1.133519                | 1.474394  | 0.469180  |
| 12               | 6                | 0              | 1.756027                | 0.719291  | -0.432010 |
| 13               | 1                | 0              | 1.481723                | 0.949753  | -1.455777 |
| 14               | 6                | 0              | 1.498825                | 1.536560  | 1.889726  |
| 15               | 1                | 0              | 2.581409                | 1.483186  | 1.998573  |
| 16               | 1                | 0              | 1.141131                | 2.480781  | 2.295796  |
| 17               | 1                | 0              | 1.025160                | 0.719225  | 2.444661  |
| 18               | 6                | 0              | 2.841321                | -0.222312 | -0.266262 |
| 19               | 6                | 0              | 3.600129                | -0.494060 | -1.431082 |
| 20               | 6                | 0              | 3.176670                | -0.907022 | 0.926267  |
| 21               | 6                | 0              | 4.668950                | -1.380205 | -1.397930 |
| 22               | 1                | 0              | 3.344069                | 0.007908  | -2.359298 |
| 23               | 6                | 0              | 4.241930                | -1.799922 | 0.946554  |
| 24               | 1                | 0              | 2.589425                | -0.776090 | 1.824985  |
| 25               | 6                | 0              | 4.997489                | -2.034778 | -0.206883 |
| 26               | 1                | 0              | 5.243079                | -1.565518 | -2.299922 |
| 27               | 1                | 0              | 4.479650                | -2.323416 | 1.866976  |
| 28               | 1                | 0              | 5.828698                | -2.732098 | -0.179538 |
| 29               | 6                | 0              | -1.052080               | -0.161170 | -0.714509 |
| 30               | 6                | 0              | -1.915731               | -0.892686 | 0.252035  |
| 31               | 1                | 0              | -1.368885               | -0.415853 | -1.730473 |
| 32               | 1                | 0              | 0.014189                | -0.492697 | -0.650745 |
| 33               | 6                | 0              | -1.716500               | -0.678035 | 1.726343  |
| 34               | 1                | 0              | -0.758675               | -1.093647 | 2.094542  |
| 35               | 1                | 0              | -1.697940               | 0.388675  | 1.990653  |



|    |   |   |           |           |           |
|----|---|---|-----------|-----------|-----------|
| 36 | 1 | 0 | -2.509911 | -1.147506 | 2.310444  |
| 37 | 6 | 0 | -2.787266 | -1.870154 | -0.272895 |
| 38 | 8 | 0 | -2.984475 | -2.151265 | -1.475719 |
| 39 | 8 | 0 | -3.496010 | -2.572250 | 0.709668  |
| 40 | 6 | 0 | -4.421449 | -3.533855 | 0.216625  |
| 41 | 1 | 0 | -4.886872 | -3.984405 | 1.096164  |
| 42 | 1 | 0 | -5.192583 | -3.073237 | -0.410471 |
| 43 | 1 | 0 | -3.925199 | -4.310825 | -0.374512 |

0203daa\_Ph\_NMeBn\_CHC\_Me\_COOMe\_ZW\_INT\_B3lyp631pd\_PCMDMSO\_TS\_CH.log

Standard orientation:

| Center Number | Atomic Number | Atomic Type | Coordinates (Angstroms) |           |           |
|---------------|---------------|-------------|-------------------------|-----------|-----------|
|               |               |             | X                       | Y         | Z         |
| 1             | 6             | 0           | 2.477919                | -3.362841 | -0.685444 |
| 2             | 6             | 0           | 2.310073                | -1.986693 | -0.763506 |
| 3             | 6             | 0           | 1.086906                | -1.363646 | -0.459772 |
| 4             | 6             | 0           | 0.027039                | -2.198621 | -0.048466 |
| 5             | 6             | 0           | 0.193248                | -3.591943 | 0.051659  |
| 6             | 6             | 0           | 1.411323                | -4.171850 | -0.268319 |
| 7             | 1             | 0           | 3.431258                | -3.810247 | -0.949429 |
| 8             | 1             | 0           | 3.139497                | -1.349321 | -1.058314 |
| 9             | 1             | 0           | -0.641385               | -4.215513 | 0.353993  |
| 10            | 1             | 0           | 1.529069                | -5.248841 | -0.204703 |
| 11            | 7             | 0           | -1.242981               | -1.621366 | 0.289501  |
| 12            | 6             | 0           | -1.715840               | -0.659996 | -0.511868 |
| 13            | 1             | 0           | -1.355961               | -0.726540 | -1.532914 |
| 14            | 6             | 0           | -1.823580               | -1.952710 | 1.597457  |
| 15            | 1             | 0           | -2.900662               | -1.795373 | 1.573169  |
| 16            | 1             | 0           | -1.622592               | -2.999783 | 1.814836  |
| 17            | 1             | 0           | -1.374241               | -1.344795 | 2.389564  |
| 18            | 6             | 0           | -2.784076               | 0.287784  | -0.274589 |
| 19            | 6             | 0           | -3.445336               | 0.784466  | -1.423818 |
| 20            | 6             | 0           | -3.175052               | 0.786590  | 0.990613  |
| 21            | 6             | 0           | -4.477456               | 1.707520  | -1.311513 |
| 22            | 1             | 0           | -3.144746               | 0.427073  | -2.404307 |
| 23            | 6             | 0           | -4.202618               | 1.717889  | 1.091902  |
| 24            | 1             | 0           | -2.655656               | 0.480443  | 1.889314  |
| 25            | 6             | 0           | -4.864434               | 2.175728  | -0.051994 |
| 26            | 1             | 0           | -4.978278               | 2.066085  | -2.205074 |
| 27            | 1             | 0           | -4.483383               | 2.096402  | 2.069610  |
| 28            | 1             | 0           | -5.667401               | 2.900432  | 0.037458  |
| 29            | 6             | 0           | 1.015880                | 0.152921  | -0.527721 |
| 30            | 6             | 0           | 1.980061                | 0.859541  | 0.343425  |
| 31            | 1             | 0           | 1.170864                | 0.478815  | -1.562535 |
| 32            | 1             | 0           | -0.047747               | 0.456625  | -0.314953 |
| 33            | 6             | 0           | 2.122439                | 0.487409  | 1.797163  |
| 34            | 1             | 0           | 2.175500                | 1.372583  | 2.441308  |
| 35            | 1             | 0           | 1.270448                | -0.115809 | 2.131988  |
| 36            | 1             | 0           | 3.024528                | -0.105620 | 2.017789  |
| 37            | 6             | 0           | 2.694785                | 1.939068  | -0.223212 |
| 38            | 8             | 0           | 2.632223                | 2.370601  | -1.393928 |
| 39            | 8             | 0           | 3.557541                | 2.552599  | 0.687683  |
| 40            | 6             | 0           | 4.302291                | 3.651992  | 0.173535  |
| 41            | 1             | 0           | 4.919221                | 4.012073  | 0.999617  |
| 42            | 1             | 0           | 4.944647                | 3.351361  | -0.660919 |
| 43            | 1             | 0           | 3.648343                | 4.458251  | -0.175244 |

0208aaa\_Ph\_NMeBn\_CHC\_Me\_COOMe\_product\_B3lyp631pd\_PCMDMSO.log

Standard orientation:

| Center Number | Atomic Number | Atomic Type | Coordinates (Angstroms) |           |           |
|---------------|---------------|-------------|-------------------------|-----------|-----------|
|               |               |             | X                       | Y         | Z         |
| 1             | 6             | 0           | 4.855612                | 0.172316  | 0.229242  |
| 2             | 6             | 0           | 3.783557                | 1.063837  | 0.295117  |
| 3             | 6             | 0           | 2.473496                | 0.660985  | 0.031034  |
| 4             | 6             | 0           | 2.205830                | -0.693958 | -0.280306 |
| 5             | 6             | 0           | 3.295155                | -1.589882 | -0.347949 |
| 6             | 6             | 0           | 4.596863                | -1.158548 | -0.098903 |
| 7             | 1             | 0           | 5.867328                | 0.510672  | 0.429483  |

|    |   |   |           |           |           |
|----|---|---|-----------|-----------|-----------|
| 8  | 1 | 0 | 3.962235  | 2.107639  | 0.543409  |
| 9  | 1 | 0 | 3.125573  | -2.633486 | -0.582969 |
| 10 | 1 | 0 | 5.410329  | -1.876459 | -0.158086 |
| 11 | 7 | 0 | 0.899473  | -1.149250 | -0.495292 |
| 12 | 6 | 0 | -0.240345 | -0.216003 | -0.492254 |
| 13 | 1 | 0 | -0.353281 | 0.234946  | -1.488749 |
| 14 | 6 | 0 | 0.749012  | -2.335190 | -1.342984 |
| 15 | 1 | 0 | -0.286872 | -2.423855 | -1.665338 |
| 16 | 1 | 0 | 1.384860  | -2.271642 | -2.235696 |
| 17 | 1 | 0 | 1.004260  | -3.254426 | -0.804482 |
| 18 | 6 | 0 | -1.550915 | -0.937433 | -0.178119 |
| 19 | 6 | 0 | -1.636938 | -1.930185 | 0.809594  |
| 20 | 6 | 0 | -2.713889 | -0.589804 | -0.878984 |
| 21 | 6 | 0 | -2.855781 | -2.544151 | 1.098758  |
| 22 | 1 | 0 | -0.739635 | -2.231632 | 1.339890  |
| 23 | 6 | 0 | -3.936436 | -1.199755 | -0.587982 |
| 24 | 1 | 0 | -2.660849 | 0.160739  | -1.662570 |
| 25 | 6 | 0 | -4.011788 | -2.177995 | 0.404222  |
| 26 | 1 | 0 | -2.901939 | -3.312467 | 1.865154  |
| 27 | 1 | 0 | -4.825169 | -0.916135 | -1.144100 |
| 28 | 1 | 0 | -4.959566 | -2.658246 | 0.628594  |
| 29 | 6 | 0 | 1.340421  | 1.655497  | 0.043138  |
| 30 | 6 | 0 | 0.020615  | 0.982048  | 0.493645  |
| 31 | 1 | 0 | 1.577387  | 2.491533  | 0.710409  |
| 32 | 1 | 0 | 1.198130  | 2.082108  | -0.956334 |
| 33 | 6 | 0 | 0.115940  | 0.552333  | 1.965627  |
| 34 | 1 | 0 | 0.896119  | -0.198865 | 2.099374  |
| 35 | 1 | 0 | 0.362099  | 1.417371  | 2.587001  |
| 36 | 1 | 0 | -0.828320 | 0.142791  | 2.325296  |
| 37 | 6 | 0 | -1.118669 | 1.999896  | 0.356008  |
| 38 | 8 | 0 | -1.820665 | 2.391021  | 1.267746  |
| 39 | 8 | 0 | -1.245284 | 2.451860  | -0.908324 |
| 40 | 6 | 0 | -2.276612 | 3.436330  | -1.127978 |
| 41 | 1 | 0 | -2.223950 | 3.683518  | -2.187031 |
| 42 | 1 | 0 | -3.256139 | 3.022945  | -0.879345 |
| 43 | 1 | 0 | -2.092100 | 4.322629  | -0.517773 |

0208aba\_Ph\_NMeBn\_CHC\_Me\_COOMe\_product\_B3lyp631pd\_PCMDmso.log

Standard orientation:

| Center Number | Atomic Number | Atomic Type | Coordinates (Angstroms) |           |           |
|---------------|---------------|-------------|-------------------------|-----------|-----------|
|               |               |             | X                       | Y         | Z         |
| 1             | 6             | 0           | 4.855802                | 0.172430  | 0.228533  |
| 2             | 6             | 0           | 3.783707                | 1.063888  | 0.294685  |
| 3             | 6             | 0           | 2.473574                | 0.660909  | 0.031129  |
| 4             | 6             | 0           | 2.205900                | -0.694066 | -0.280036 |
| 5             | 6             | 0           | 3.295243                | -1.589929 | -0.347889 |
| 6             | 6             | 0           | 4.597012                | -1.158494 | -0.099313 |
| 7             | 1             | 0           | 5.867569                | 0.510849  | 0.428402  |
| 8             | 1             | 0           | 3.962381                | 2.107732  | 0.542795  |
| 9             | 1             | 0           | 3.125655                | -2.633588 | -0.582682 |
| 10            | 1             | 0           | 5.410485                | -1.876382 | -0.158676 |
| 11            | 7             | 0           | 0.899493                | -1.149484 | -0.494569 |
| 12            | 6             | 0           | -0.240177               | -0.216078 | -0.491907 |
| 13            | 1             | 0           | -0.352755               | 0.234817  | -1.488471 |
| 14            | 6             | 0           | 0.748882                | -2.335322 | -1.342372 |
| 15            | 1             | 0           | -0.287057               | -2.423902 | -1.664600 |
| 16            | 1             | 0           | 1.384573                | -2.271693 | -2.235204 |
| 17            | 1             | 0           | 1.004229                | -3.254628 | -0.804043 |
| 18            | 6             | 0           | -1.550870               | -0.937306 | -0.178050 |
| 19            | 6             | 0           | -1.637241               | -1.929669 | 0.810054  |
| 20            | 6             | 0           | -2.713526               | -0.590008 | -0.879548 |
| 21            | 6             | 0           | -2.856193               | -2.543459 | 1.099043  |
| 22            | 1             | 0           | -0.740098               | -2.230897 | 1.340755  |
| 23            | 6             | 0           | -3.936208               | -1.199825 | -0.588733 |
| 24            | 1             | 0           | -2.660151               | 0.160151  | -1.663482 |
| 25            | 6             | 0           | -4.011947               | -2.177580 | 0.403893  |
| 26            | 1             | 0           | -2.902690               | -3.311430 | 1.865764  |
| 27            | 1             | 0           | -4.824719               | -0.916464 | -1.145340 |
| 28            | 1             | 0           | -4.959817               | -2.657701 | 0.628150  |
| 29            | 6             | 0           | 1.340524                | 1.655490  | 0.043552  |
| 30            | 6             | 0           | 0.020674                | 0.982089  | 0.493933  |
| 31            | 1             | 0           | 1.577602                | 2.491304  | 0.711055  |

|    |   |   |           |           |           |
|----|---|---|-----------|-----------|-----------|
| 32 | 1 | 0 | 1.198297  | 2.082379  | -0.955813 |
| 33 | 6 | 0 | 0.115769  | 0.552546  | 1.965987  |
| 34 | 1 | 0 | 0.895824  | -0.198760 | 2.099874  |
| 35 | 1 | 0 | 0.362031  | 1.417628  | 2.587257  |
| 36 | 1 | 0 | -0.828600 | 0.143235  | 2.325626  |
| 37 | 6 | 0 | -1.118686 | 1.999828  | 0.355974  |
| 38 | 8 | 0 | -1.820793 | 2.391100  | 1.267552  |
| 39 | 8 | 0 | -1.245277 | 2.451480  | -0.908466 |
| 40 | 6 | 0 | -2.276835 | 3.435614  | -1.128363 |
| 41 | 1 | 0 | -2.224499 | 3.682284  | -2.187552 |
| 42 | 1 | 0 | -3.256224 | 3.022181  | -0.879265 |
| 43 | 1 | 0 | -2.092350 | 4.322283  | -0.518679 |

0208abb\_Ph\_NMeBn\_CHC\_Me\_COOMe\_product\_B3lyp631pd\_PCMDmso.log

Standard orientation:

| Center<br>Number | Atomic<br>Number | Atomic<br>Type | Coordinates (Angstroms) |           |           |
|------------------|------------------|----------------|-------------------------|-----------|-----------|
|                  |                  |                | X                       | Y         | Z         |
| 1                | 6                | 0              | -4.603961               | -0.344152 | -0.073008 |
| 2                | 6                | 0              | -3.704016               | 0.482986  | 0.601490  |
| 3                | 6                | 0              | -2.344474               | 0.180504  | 0.685874  |
| 4                | 6                | 0              | -1.843769               | -0.980801 | 0.053052  |
| 5                | 6                | 0              | -2.760180               | -1.817712 | -0.621137 |
| 6                | 6                | 0              | -4.116454               | -1.500645 | -0.680713 |
| 7                | 1                | 0              | -5.658380               | -0.090571 | -0.119918 |
| 8                | 1                | 0              | -4.062800               | 1.386381  | 1.090118  |
| 9                | 1                | 0              | -2.413895               | -2.716441 | -1.115851 |
| 10               | 1                | 0              | -4.790420               | -2.167331 | -1.211842 |
| 11               | 7                | 0              | -0.479830               | -1.288117 | 0.067889  |
| 12               | 6                | 0              | 0.474309                | -0.508146 | 0.873765  |
| 13               | 1                | 0              | 0.493540                | -0.908608 | 1.900782  |
| 14               | 6                | 0              | -0.123186               | -2.693497 | -0.138680 |
| 15               | 1                | 0              | 0.923260                | -2.846429 | 0.117566  |
| 16               | 1                | 0              | -0.733460               | -3.361035 | 0.484846  |
| 17               | 1                | 0              | -0.249973               | -2.991320 | -1.185036 |
| 18               | 6                | 0              | 1.892166                | -0.638396 | 0.315330  |
| 19               | 6                | 0              | 2.152139                | -0.508856 | -1.057325 |
| 20               | 6                | 0              | 2.967670                | -0.876309 | 1.180595  |
| 21               | 6                | 0              | 3.455443                | -0.597289 | -1.546561 |
| 22               | 1                | 0              | 1.324208                | -0.356673 | -1.741875 |
| 23               | 6                | 0              | 4.274361                | -0.961861 | 0.693634  |
| 24               | 1                | 0              | 2.781878                | -1.001422 | 2.243971  |
| 25               | 6                | 0              | 4.522584                | -0.819892 | -0.672214 |
| 26               | 1                | 0              | 3.637454                | -0.496487 | -2.612623 |
| 27               | 1                | 0              | 5.094089                | -1.147461 | 1.381442  |
| 28               | 1                | 0              | 5.536616                | -0.890933 | -1.054233 |
| 29               | 6                | 0              | -1.421717               | 1.055195  | 1.492867  |
| 30               | 6                | 0              | 0.062684                | 0.999437  | 1.060986  |
| 31               | 1                | 0              | -1.770631               | 2.093960  | 1.477694  |
| 32               | 1                | 0              | -1.456982               | 0.744734  | 2.546154  |
| 33               | 6                | 0              | 0.918510                | 1.619857  | 2.180155  |
| 34               | 1                | 0              | 0.811138                | 1.037540  | 3.099770  |
| 35               | 1                | 0              | 1.974403                | 1.659472  | 1.910941  |
| 36               | 1                | 0              | 0.586067                | 2.641356  | 2.382134  |
| 37               | 6                | 0              | 0.280496                | 1.840420  | -0.207361 |
| 38               | 8                | 0              | 1.071652                | 2.761170  | -0.293764 |
| 39               | 8                | 0              | -0.523723               | 1.481489  | -1.223616 |
| 40               | 6                | 0              | -0.400741               | 2.261602  | -2.430432 |
| 41               | 1                | 0              | -1.129632               | 1.843717  | -3.123046 |
| 42               | 1                | 0              | -0.620611               | 3.312152  | -2.229884 |
| 43               | 1                | 0              | 0.608328                | 2.176264  | -2.839195 |

0301aaa\_Ph\_NMeBn\_CHC\_COOMe\_CN\_B3lyp631pd\_PCMDmso.log

Standard orientation:

| Center<br>Number | Atomic<br>Number | Atomic<br>Type | Coordinates (Angstroms) |           |           |
|------------------|------------------|----------------|-------------------------|-----------|-----------|
|                  |                  |                | X                       | Y         | Z         |
| 1                | 6                | 0              | 4.440058                | -0.789847 | -0.156018 |
| 2                | 6                | 0              | 3.423454                | 0.151019  | -0.095336 |
| 3                | 6                | 0              | 2.063536                | -0.225001 | -0.151841 |

|    |   |   |           |           |           |
|----|---|---|-----------|-----------|-----------|
| 4  | 6 | 0 | 1.729566  | -1.615977 | -0.225460 |
| 5  | 6 | 0 | 2.778816  | -2.550041 | -0.305879 |
| 6  | 6 | 0 | 4.108897  | -2.143744 | -0.273620 |
| 7  | 1 | 0 | 5.477761  | -0.474678 | -0.133726 |
| 8  | 1 | 0 | 3.678751  | 1.202958  | -0.059281 |
| 9  | 1 | 0 | 2.555991  | -3.607674 | -0.364356 |
| 10 | 1 | 0 | 4.892878  | -2.893445 | -0.325027 |
| 11 | 7 | 0 | 0.383564  | -2.025910 | -0.241993 |
| 12 | 6 | 0 | -0.460591 | -1.667359 | 0.911448  |
| 13 | 1 | 0 | -0.041004 | -0.775895 | 1.384677  |
| 14 | 1 | 0 | -0.405595 | -2.465937 | 1.669142  |
| 15 | 6 | 0 | 0.105804  | -3.380245 | -0.722696 |
| 16 | 1 | 0 | -0.966833 | -3.471327 | -0.902187 |
| 17 | 1 | 0 | 0.626753  | -3.559471 | -1.664890 |
| 18 | 1 | 0 | 0.395183  | -4.157516 | 0.000916  |
| 19 | 6 | 0 | -1.921458 | -1.412117 | 0.573142  |
| 20 | 6 | 0 | -2.873901 | -1.486733 | 1.599347  |
| 21 | 6 | 0 | -2.348188 | -1.067871 | -0.714698 |
| 22 | 6 | 0 | -4.217595 | -1.208611 | 1.348905  |
| 23 | 1 | 0 | -2.559505 | -1.764143 | 2.602715  |
| 24 | 6 | 0 | -3.695565 | -0.797863 | -0.970334 |
| 25 | 1 | 0 | -1.624519 | -1.026248 | -1.522512 |
| 26 | 6 | 0 | -4.634052 | -0.862862 | 0.060420  |
| 27 | 1 | 0 | -4.940298 | -1.269531 | 2.157416  |
| 28 | 1 | 0 | -4.009758 | -0.541157 | -1.978001 |
| 29 | 1 | 0 | -5.680933 | -0.653551 | -0.138208 |
| 30 | 6 | 0 | 1.007693  | 0.758533  | -0.282346 |
| 31 | 6 | 0 | 0.959940  | 2.066762  | 0.110080  |
| 32 | 1 | 0 | 0.113896  | 0.402970  | -0.785285 |
| 33 | 6 | 0 | 1.973591  | 2.708535  | 0.888045  |
| 34 | 7 | 0 | 2.785074  | 3.241463  | 1.531436  |
| 35 | 6 | 0 | -0.202529 | 2.947749  | -0.195715 |
| 36 | 8 | 0 | -0.286506 | 4.102495  | 0.186475  |
| 37 | 8 | 0 | -1.141538 | 2.330604  | -0.930161 |
| 38 | 6 | 0 | -2.313726 | 3.111337  | -1.239711 |
| 39 | 1 | 0 | -2.785943 | 3.469381  | -0.323014 |
| 40 | 1 | 0 | -2.046917 | 3.963315  | -1.868460 |
| 41 | 1 | 0 | -2.978517 | 2.434296  | -1.772935 |

0301daa\_Ph\_NMeBn\_CHC\_COOMe\_CN\_ZW\_INT\_B3lyp631pd\_PCMdmsO\_TS\_CH.log

Standard orientation:

| Center Number | Atomic Number | Atomic Type | Coordinates (Angstroms) |           |           |
|---------------|---------------|-------------|-------------------------|-----------|-----------|
|               |               |             | X                       | Y         | Z         |
| 1             | 6             | 0           | 4.139870                | -1.537260 | -0.605629 |
| 2             | 6             | 0           | 3.230654                | -0.503998 | -0.809034 |
| 3             | 6             | 0           | 1.856363                | -0.691780 | -0.598598 |
| 4             | 6             | 0           | 1.418204                | -1.951886 | -0.132494 |
| 5             | 6             | 0           | 2.336096                | -2.989690 | 0.082738  |
| 6             | 6             | 0           | 3.689245                | -2.784013 | -0.157525 |
| 7             | 1             | 0           | 5.194964                | -1.375230 | -0.801497 |
| 8             | 1             | 0           | 3.576246                | 0.468527  | -1.146526 |
| 9             | 1             | 0           | 1.981205                | -3.955749 | 0.425701  |
| 10            | 1             | 0           | 4.392104                | -3.596009 | -0.000874 |
| 11            | 7             | 0           | 0.039061                | -2.125499 | 0.180959  |
| 12            | 6             | 0           | -0.818357               | -1.422306 | -0.638500 |
| 13            | 1             | 0           | -0.636956               | -1.623134 | -1.695464 |
| 14            | 6             | 0           | -0.289876               | -2.499747 | 1.562006  |
| 15            | 1             | 0           | -1.344460               | -2.762541 | 1.627693  |
| 16            | 1             | 0           | 0.303494                | -3.372075 | 1.836397  |
| 17            | 1             | 0           | -0.064899               | -1.692257 | 2.269338  |
| 18            | 6             | 0           | -2.227531               | -1.125710 | -0.308720 |
| 19            | 6             | 0           | -3.206965               | -1.397946 | -1.280947 |
| 20            | 6             | 0           | -2.615746               | -0.507421 | 0.895111  |
| 21            | 6             | 0           | -4.545841               | -1.097572 | -1.040401 |
| 22            | 1             | 0           | -2.914712               | -1.855998 | -2.221223 |
| 23            | 6             | 0           | -3.954388               | -0.200927 | 1.127107  |
| 24            | 1             | 0           | -1.871614               | -0.246832 | 1.639598  |
| 25            | 6             | 0           | -4.922831               | -0.500482 | 0.164851  |
| 26            | 1             | 0           | -5.292743               | -1.325196 | -1.794288 |
| 27            | 1             | 0           | -4.241127               | 0.279001  | 2.057399  |
| 28            | 1             | 0           | -5.965223               | -0.260944 | 0.350572  |
| 29            | 6             | 0           | 0.906416                | 0.452524  | -0.814221 |

|    |   |   |           |           |           |
|----|---|---|-----------|-----------|-----------|
| 30 | 6 | 0 | 0.986690  | 1.602593  | 0.041155  |
| 31 | 1 | 0 | 0.767798  | 0.731695  | -1.861925 |
| 32 | 1 | 0 | -0.209613 | -0.139915 | -0.679976 |
| 33 | 6 | 0 | 0.523308  | 2.882895  | -0.468590 |
| 34 | 8 | 0 | 0.109543  | 3.079020  | -1.608284 |
| 35 | 8 | 0 | 0.601956  | 3.875262  | 0.459873  |
| 36 | 6 | 0 | 0.173486  | 5.172853  | 0.019632  |
| 37 | 1 | 0 | 0.297571  | 5.830958  | 0.879251  |
| 38 | 1 | 0 | 0.786090  | 5.523334  | -0.814881 |
| 39 | 1 | 0 | -0.873704 | 5.152457  | -0.292319 |
| 40 | 6 | 0 | 1.374284  | 1.467675  | 1.391259  |
| 41 | 7 | 0 | 1.690239  | 1.322476  | 2.509771  |

0302aaa\_Ph\_NMeBn\_CHC\_COOMe\_CN\_ZW\_INT\_B3lyp631pd\_PCMdmsol.log

Standard orientation:

| Center<br>Number | Atomic<br>Number | Atomic<br>Type | Coordinates (Angstroms) |           |           |
|------------------|------------------|----------------|-------------------------|-----------|-----------|
|                  |                  |                | X                       | Y         | Z         |
| 1                | 6                | 0              | -2.454070               | 3.381314  | -0.189701 |
| 2                | 6                | 0              | -2.310264               | 2.145336  | -0.815231 |
| 3                | 6                | 0              | -1.198169               | 1.317674  | -0.583646 |
| 4                | 6                | 0              | -0.237486               | 1.807088  | 0.318682  |
| 5                | 6                | 0              | -0.365428               | 3.044070  | 0.957302  |
| 6                | 6                | 0              | -1.477744               | 3.839066  | 0.698559  |
| 7                | 1                | 0              | -3.328273               | 3.990930  | -0.397076 |
| 8                | 1                | 0              | -3.079848               | 1.779673  | -1.486142 |
| 9                | 1                | 0              | 0.411366                | 3.383289  | 1.635286  |
| 10               | 1                | 0              | -1.575945               | 4.805364  | 1.181816  |
| 11               | 7                | 0              | 0.942898                | 1.011858  | 0.641343  |
| 12               | 6                | 0              | 1.877403                | 0.883768  | -0.259847 |
| 13               | 1                | 0              | 1.731091                | 1.500243  | -1.143254 |
| 14               | 6                | 0              | 0.999272                | 0.434755  | 2.001603  |
| 15               | 1                | 0              | 2.038118                | 0.355041  | 2.319391  |
| 16               | 1                | 0              | 0.458220                | 1.107965  | 2.664101  |
| 17               | 1                | 0              | 0.521776                | -0.548491 | 2.004996  |
| 18               | 6                | 0              | 3.069222                | 0.063979  | -0.231065 |
| 19               | 6                | 0              | 4.146354                | 0.512659  | -1.027756 |
| 20               | 6                | 0              | 3.187620                | -1.153616 | 0.475852  |
| 21               | 6                | 0              | 5.337253                | -0.201487 | -1.063225 |
| 22               | 1                | 0              | 4.044331                | 1.429875  | -1.599360 |
| 23               | 6                | 0              | 4.374621                | -1.874134 | 0.408406  |
| 24               | 1                | 0              | 2.342717                | -1.566161 | 1.013812  |
| 25               | 6                | 0              | 5.452614                | -1.394022 | -0.342532 |
| 26               | 1                | 0              | 6.167602                | 0.159570  | -1.660273 |
| 27               | 1                | 0              | 4.458096                | -2.817965 | 0.936469  |
| 28               | 1                | 0              | 6.377527                | -1.960721 | -0.380957 |
| 29               | 6                | 0              | -1.130481               | -0.046086 | -1.264432 |
| 30               | 6                | 0              | -1.722868               | -1.179726 | -0.440754 |
| 31               | 1                | 0              | -1.691162               | 0.034632  | -2.200828 |
| 32               | 1                | 0              | -0.101722               | -0.290983 | -1.542245 |
| 33               | 6                | 0              | -3.128566               | -1.374455 | -0.468799 |
| 34               | 8                | 0              | -3.947497               | -0.712566 | -1.125468 |
| 35               | 8                | 0              | -3.554747               | -2.428579 | 0.324561  |
| 36               | 6                | 0              | -4.960466               | -2.675563 | 0.311212  |
| 37               | 1                | 0              | -5.124017               | -3.508420 | 0.997424  |
| 38               | 1                | 0              | -5.525965               | -1.801675 | 0.649072  |
| 39               | 1                | 0              | -5.312647               | -2.948479 | -0.688761 |
| 40               | 6                | 0              | -0.882666               | -1.981820 | 0.326976  |
| 41               | 7                | 0              | -0.121501               | -2.621474 | 0.963536  |

0308aaa\_Ph\_NMeBn\_CHC\_COOMe\_CN\_product\_B3lyp631pd\_PCMdmsol.log

Standard orientation:

| Center<br>Number | Atomic<br>Number | Atomic<br>Type | Coordinates (Angstroms) |           |           |
|------------------|------------------|----------------|-------------------------|-----------|-----------|
|                  |                  |                | X                       | Y         | Z         |
| 1                | 6                | 0              | 4.860776                | 0.067868  | -0.554430 |
| 2                | 6                | 0              | 3.812903                | 0.978035  | -0.461202 |
| 3                | 6                | 0              | 2.485862                | 0.560755  | -0.290695 |
| 4                | 6                | 0              | 2.199778                | -0.821310 | -0.212411 |
| 5                | 6                | 0              | 3.268485                | -1.737364 | -0.312555 |

|    |   |   |           |           |           |
|----|---|---|-----------|-----------|-----------|
| 6  | 6 | 0 | 4.576846  | -1.299336 | -0.475499 |
| 7  | 1 | 0 | 5.880422  | 0.415898  | -0.684906 |
| 8  | 1 | 0 | 4.018803  | 2.044730  | -0.509195 |
| 9  | 1 | 0 | 3.064382  | -2.802185 | -0.286752 |
| 10 | 1 | 0 | 5.376324  | -2.030370 | -0.553634 |
| 11 | 7 | 0 | 0.875264  | -1.280382 | -0.068754 |
| 12 | 6 | 0 | -0.176703 | -0.310604 | -0.366589 |
| 13 | 1 | 0 | -0.048683 | -0.011497 | -1.412417 |
| 14 | 6 | 0 | 0.584587  | -2.374955 | 0.864311  |
| 15 | 1 | 0 | -0.163516 | -3.051999 | 0.446167  |
| 16 | 1 | 0 | 1.494506  | -2.943805 | 1.042971  |
| 17 | 1 | 0 | 0.223895  | -2.013812 | 1.834874  |
| 18 | 6 | 0 | -1.579231 | -0.892710 | -0.260942 |
| 19 | 6 | 0 | -2.363587 | -0.832479 | 0.898827  |
| 20 | 6 | 0 | -2.103931 | -1.531705 | -1.394283 |
| 21 | 6 | 0 | -3.641282 | -1.396843 | 0.921312  |
| 22 | 1 | 0 | -1.990020 | -0.347886 | 1.793882  |
| 23 | 6 | 0 | -3.376216 | -2.101630 | -1.371206 |
| 24 | 1 | 0 | -1.507548 | -1.581978 | -2.301295 |
| 25 | 6 | 0 | -4.150512 | -2.034006 | -0.210529 |
| 26 | 1 | 0 | -4.235972 | -1.337494 | 1.827772  |
| 27 | 1 | 0 | -3.764213 | -2.590816 | -2.259511 |
| 28 | 1 | 0 | -5.143936 | -2.471724 | -0.190209 |
| 29 | 6 | 0 | 1.401174  | 1.611945  | -0.186320 |
| 30 | 6 | 0 | 0.080234  | 1.049452  | 0.415678  |
| 31 | 1 | 0 | 1.750858  | 2.459418  | 0.411289  |
| 32 | 1 | 0 | 1.149532  | 2.006313  | -1.175704 |
| 33 | 6 | 0 | -1.074023 | 2.041228  | 0.215224  |
| 34 | 8 | 0 | -1.726151 | 2.539051  | 1.108983  |
| 35 | 8 | 0 | -1.265308 | 2.274516  | -1.088117 |
| 36 | 6 | 0 | -2.344353 | 3.178930  | -1.420632 |
| 37 | 1 | 0 | -2.345211 | 3.239986  | -2.507025 |
| 38 | 1 | 0 | -3.292420 | 2.780865  | -1.055116 |
| 39 | 1 | 0 | -2.161795 | 4.159803  | -0.978776 |
| 40 | 6 | 0 | 0.261001  | 0.830802  | 1.858364  |
| 41 | 7 | 0 | 0.452656  | 0.659180  | 2.990485  |

0308aba\_Ph\_NMeBn\_CHC\_COOMe\_CN\_product\_B3lyp631pd\_PCMDms0.log

Standard orientation:

| Center<br>Number | Atomic<br>Number | Atomic<br>Type | Coordinates (Angstroms) |           |           |
|------------------|------------------|----------------|-------------------------|-----------|-----------|
|                  |                  |                | X                       | Y         | Z         |
| 1                | 6                | 0              | 4.863325                | 0.224158  | 0.063199  |
| 2                | 6                | 0              | 3.783551                | 1.104335  | 0.118684  |
| 3                | 6                | 0              | 2.473296                | 0.673503  | -0.100072 |
| 4                | 6                | 0              | 2.213715                | -0.694562 | -0.352951 |
| 5                | 6                | 0              | 3.313040                | -1.578263 | -0.408359 |
| 6                | 6                | 0              | 4.613255                | -1.121888 | -0.205027 |
| 7                | 1                | 0              | 5.874706                | 0.581704  | 0.226916  |
| 8                | 1                | 0              | 3.953458                | 2.158489  | 0.323886  |
| 9                | 1                | 0              | 3.154261                | -2.631725 | -0.600075 |
| 10               | 1                | 0              | 5.433728                | -1.832156 | -0.253780 |
| 11               | 7                | 0              | 0.906377                | -1.180152 | -0.517572 |
| 12               | 6                | 0              | -0.228504               | -0.253240 | -0.586573 |
| 13               | 1                | 0              | -0.312927               | 0.192449  | -1.587938 |
| 14               | 6                | 0              | 0.757994                | -2.425728 | -1.277812 |
| 15               | 1                | 0              | -0.289363               | -2.575600 | -1.530682 |
| 16               | 1                | 0              | 1.340422                | -2.399629 | -2.207881 |
| 17               | 1                | 0              | 1.080835                | -3.290704 | -0.690211 |
| 18               | 6                | 0              | -1.555738               | -0.936617 | -0.269294 |
| 19               | 6                | 0              | -1.691205               | -1.817372 | 0.814061  |
| 20               | 6                | 0              | -2.678524               | -0.657944 | -1.059485 |
| 21               | 6                | 0              | -2.927399               | -2.393124 | 1.106069  |
| 22               | 1                | 0              | -0.823711               | -2.061072 | 1.417624  |
| 23               | 6                | 0              | -3.917380               | -1.231789 | -0.764911 |
| 24               | 1                | 0              | -2.582381               | 0.007621  | -1.912610 |
| 25               | 6                | 0              | -4.045161               | -2.099255 | 0.320471  |
| 26               | 1                | 0              | -3.016953               | -3.075315 | 1.946193  |
| 27               | 1                | 0              | -4.776892               | -1.006395 | -1.388918 |
| 28               | 1                | 0              | -5.006071               | -2.550425 | 0.548775  |
| 29               | 6                | 0              | 1.339226                | 1.666045  | -0.082952 |
| 30               | 6                | 0              | 0.022470                | 0.978444  | 0.365406  |
| 31               | 1                | 0              | 1.567562                | 2.505046  | 0.580833  |

|    |   |   |           |          |           |
|----|---|---|-----------|----------|-----------|
| 32 | 1 | 0 | 1.159142  | 2.084421 | -1.078465 |
| 33 | 6 | 0 | -1.156435 | 1.967567 | 0.283632  |
| 34 | 8 | 0 | -1.839390 | 2.304878 | 1.226100  |
| 35 | 8 | 0 | -1.305290 | 2.418817 | -0.966183 |
| 36 | 6 | 0 | -2.375754 | 3.371253 | -1.174205 |
| 37 | 1 | 0 | -2.333209 | 3.625671 | -2.231200 |
| 38 | 1 | 0 | -3.335142 | 2.915506 | -0.924224 |
| 39 | 1 | 0 | -2.214677 | 4.255804 | -0.556172 |
| 40 | 6 | 0 | 0.156037  | 0.552969 | 1.769416  |
| 41 | 7 | 0 | 0.311595  | 0.228120 | 2.872260  |

0308abb\_Ph\_NMeBn\_CHC\_COOMe\_CN\_product\_B3lyp631pd\_PCMDmso.log

Standard orientation:

| Center<br>Number | Atomic<br>Number | Atomic<br>Type | Coordinates (Angstroms) |           |           |
|------------------|------------------|----------------|-------------------------|-----------|-----------|
|                  |                  |                | X                       | Y         | Z         |
| 1                | 6                | 0              | 4.662655                | -0.252874 | -0.090424 |
| 2                | 6                | 0              | 3.713865                | 0.663716  | -0.542979 |
| 3                | 6                | 0              | 2.361549                | 0.331901  | -0.641078 |
| 4                | 6                | 0              | 1.919922                | -0.951386 | -0.248864 |
| 5                | 6                | 0              | 2.886548                | -1.874962 | 0.203855  |
| 6                | 6                | 0              | 4.233795                | -1.527470 | 0.279230  |
| 7                | 1                | 0              | 5.710321                | 0.023368  | -0.029156 |
| 8                | 1                | 0              | 4.024887                | 1.661821  | -0.842254 |
| 9                | 1                | 0              | 2.587494                | -2.868358 | 0.512549  |
| 10               | 1                | 0              | 4.948206                | -2.264471 | 0.635022  |
| 11               | 7                | 0              | 0.562309                | -1.299730 | -0.269397 |
| 12               | 6                | 0              | -0.438371               | -0.419878 | -0.878428 |
| 13               | 1                | 0              | -0.464036               | -0.571304 | -1.969422 |
| 14               | 6                | 0              | 0.253474                | -2.732093 | -0.341625 |
| 15               | 1                | 0              | -0.800883               | -2.867791 | -0.572326 |
| 16               | 1                | 0              | 0.846207                | -3.231716 | -1.118954 |
| 17               | 1                | 0              | 0.446394                | -3.228095 | 0.614652  |
| 18               | 6                | 0              | -1.841677               | -0.693667 | -0.340933 |
| 19               | 6                | 0              | -2.073466               | -0.889504 | 1.028454  |
| 20               | 6                | 0              | -2.928540               | -0.724760 | -1.222975 |
| 21               | 6                | 0              | -3.367670               | -1.099544 | 1.503731  |
| 22               | 1                | 0              | -1.233782               | -0.896777 | 1.715773  |
| 23               | 6                | 0              | -4.225245               | -0.931669 | -0.747138 |
| 24               | 1                | 0              | -2.760712               | -0.589724 | -2.287775 |
| 25               | 6                | 0              | -4.448151               | -1.117755 | 0.617765  |
| 26               | 1                | 0              | -3.531777               | -1.253360 | 2.566080  |
| 27               | 1                | 0              | -5.056997               | -0.954789 | -1.444691 |
| 28               | 1                | 0              | -5.454979               | -1.283967 | 0.988765  |
| 29               | 6                | 0              | 1.391481                | 1.331668  | -1.213774 |
| 30               | 6                | 0              | -0.063455               | 1.110197  | -0.713007 |
| 31               | 1                | 0              | 1.705991                | 2.354763  | -0.987165 |
| 32               | 1                | 0              | 1.371002                | 1.249858  | -2.307028 |
| 33               | 6                | 0              | -0.271056               | 1.662114  | 0.714835  |
| 34               | 8                | 0              | -1.100068               | 2.503586  | 0.994917  |
| 35               | 8                | 0              | 0.583966                | 1.126740  | 1.586387  |
| 36               | 6                | 0              | 0.492705                | 1.617366  | 2.945057  |
| 37               | 1                | 0              | 1.263143                | 1.081649  | 3.495836  |
| 38               | 1                | 0              | 0.676719                | 2.692672  | 2.968882  |
| 39               | 1                | 0              | -0.495422               | 1.404449  | 3.356311  |
| 40               | 6                | 0              | -0.962912               | 1.880541  | -1.591699 |
| 41               | 7                | 0              | -1.623118               | 2.472233  | -2.339967 |

0401aaa\_Ph\_NMeBn\_CHC\_H\_H\_B3lyp631pd\_PCMDmso.log

Standard orientation:

| Center<br>Number | Atomic<br>Number | Atomic<br>Type | Coordinates (Angstroms) |           |           |
|------------------|------------------|----------------|-------------------------|-----------|-----------|
|                  |                  |                | X                       | Y         | Z         |
| 1                | 6                | 0              | 4.411605                | 0.082810  | 0.206908  |
| 2                | 6                | 0              | 3.456201                | 1.087838  | 0.076050  |
| 3                | 6                | 0              | 2.092634                | 0.799810  | -0.096900 |
| 4                | 6                | 0              | 1.679966                | -0.562721 | -0.122705 |
| 5                | 6                | 0              | 2.656873                | -1.566474 | -0.006340 |
| 6                | 6                | 0              | 4.005902                | -1.250588 | 0.152886  |
| 7                | 1                | 0              | 5.460127                | 0.338282  | 0.324937  |

|    |   |   |           |           |           |
|----|---|---|-----------|-----------|-----------|
| 8  | 1 | 0 | 3.771534  | 2.126764  | 0.061947  |
| 9  | 1 | 0 | 2.362241  | -2.608914 | -0.023229 |
| 10 | 1 | 0 | 4.735003  | -2.050977 | 0.240710  |
| 11 | 7 | 0 | 0.304383  | -0.882965 | -0.292281 |
| 12 | 6 | 0 | -0.587283 | -0.469198 | 0.802641  |
| 13 | 1 | 0 | -0.189805 | 0.453844  | 1.233710  |
| 14 | 1 | 0 | -0.572875 | -1.218411 | 1.613038  |
| 15 | 6 | 0 | 0.002855  | -2.234704 | -0.758324 |
| 16 | 1 | 0 | -1.046823 | -2.276972 | -1.056839 |
| 17 | 1 | 0 | 0.616493  | -2.476361 | -1.628849 |
| 18 | 1 | 0 | 0.163132  | -3.006996 | 0.012049  |
| 19 | 6 | 0 | -2.027903 | -0.227032 | 0.381331  |
| 20 | 6 | 0 | -3.052126 | -0.374368 | 1.326692  |
| 21 | 6 | 0 | -2.365240 | 0.192941  | -0.911657 |
| 22 | 6 | 0 | -4.378621 | -0.094689 | 0.994982  |
| 23 | 1 | 0 | -2.807873 | -0.710671 | 2.331617  |
| 24 | 6 | 0 | -3.692888 | 0.466223  | -1.249008 |
| 25 | 1 | 0 | -1.582124 | 0.288328  | -1.657168 |
| 26 | 6 | 0 | -4.704201 | 0.327640  | -0.296327 |
| 27 | 1 | 0 | -5.157946 | -0.214100 | 1.742229  |
| 28 | 1 | 0 | -3.936172 | 0.786357  | -2.258242 |
| 29 | 1 | 0 | -5.736508 | 0.539803  | -0.558600 |
| 30 | 6 | 0 | 1.122632  | 1.887028  | -0.320071 |
| 31 | 6 | 0 | 1.218081  | 3.141949  | 0.139911  |
| 32 | 1 | 0 | 0.258127  | 1.617932  | -0.923103 |
| 33 | 1 | 0 | 2.030317  | 3.466049  | 0.784894  |
| 34 | 1 | 0 | 0.471549  | 3.888011  | -0.113542 |

0408aaa\_Ph\_NMeBn\_CHC\_H\_H\_product\_B3lyp631pd\_PCMdmsol.log

Standard orientation:

| Center<br>Number | Atomic<br>Number | Atomic<br>Type | Coordinates (Angstroms) |           |           |
|------------------|------------------|----------------|-------------------------|-----------|-----------|
|                  |                  |                | X                       | Y         | Z         |
| 1                | 6                | 0              | 4.531474                | -0.197858 | -0.264565 |
| 2                | 6                | 0              | 3.695046                | 0.910658  | -0.357086 |
| 3                | 6                | 0              | 2.305832                | 0.805873  | -0.188890 |
| 4                | 6                | 0              | 1.745881                | -0.465247 | 0.058335  |
| 5                | 6                | 0              | 2.597283                | -1.583967 | 0.147366  |
| 6                | 6                | 0              | 3.972788                | -1.454373 | -0.003904 |
| 7                | 1                | 0              | 5.604051                | -0.087002 | -0.392678 |
| 8                | 1                | 0              | 4.122223                | 1.892906  | -0.548157 |
| 9                | 1                | 0              | 2.159475                | -2.563109 | 0.318164  |
| 10               | 1                | 0              | 4.607211                | -2.333396 | 0.065910  |
| 11               | 7                | 0              | 0.340819                | -0.658574 | 0.197846  |
| 12               | 6                | 0              | -0.465032               | 0.459038  | -0.355194 |
| 13               | 1                | 0              | -0.229540               | 0.471378  | -1.429247 |
| 14               | 6                | 0              | -0.076270               | -1.142711 | 1.520967  |
| 15               | 1                | 0              | -1.098031               | -1.523136 | 1.473905  |
| 16               | 1                | 0              | 0.575892                | -1.961206 | 1.827794  |
| 17               | 1                | 0              | -0.030775               | -0.366652 | 2.302449  |
| 18               | 6                | 0              | -1.956608               | 0.171812  | -0.251976 |
| 19               | 6                | 0              | -2.812388               | 0.888718  | 0.592382  |
| 20               | 6                | 0              | -2.502646               | -0.848747 | -1.046015 |
| 21               | 6                | 0              | -4.178733               | 0.595608  | 0.641890  |
| 22               | 1                | 0              | -2.419255               | 1.683022  | 1.218559  |
| 23               | 6                | 0              | -3.863603               | -1.146450 | -0.997542 |
| 24               | 1                | 0              | -1.847795               | -1.413222 | -1.704616 |
| 25               | 6                | 0              | -4.708646               | -0.422028 | -0.151336 |
| 26               | 1                | 0              | -4.826407               | 1.165010  | 1.302328  |
| 27               | 1                | 0              | -4.266528               | -1.938171 | -1.622663 |
| 28               | 1                | 0              | -5.770182               | -0.648396 | -0.114204 |
| 29               | 6                | 0              | 1.440924                | 2.050520  | -0.269084 |
| 30               | 6                | 0              | 0.006546                | 1.806713  | 0.213380  |
| 31               | 1                | 0              | 1.908440                | 2.859640  | 0.303756  |
| 32               | 1                | 0              | 1.410654                | 2.399080  | -1.310899 |
| 33               | 1                | 0              | -0.031837               | 1.785701  | 1.309096  |
| 34               | 1                | 0              | -0.644425               | 2.622214  | -0.116789 |

0501aaa\_Ph\_NMeBn\_CHC\_NO2\_Me\_B3lyp631pd\_PCMdmsol.log

Standard orientation:



| Center<br>Number | Atomic<br>Number | Atomic<br>Type | Coordinates (Angstroms) |           |           |
|------------------|------------------|----------------|-------------------------|-----------|-----------|
|                  |                  |                | X                       | Y         | Z         |
| 1                | 6                | 0              | 4.304801                | -1.007261 | 0.068605  |
| 2                | 6                | 0              | 3.408529                | 0.053872  | 0.009849  |
| 3                | 6                | 0              | 2.021680                | -0.158174 | -0.114875 |
| 4                | 6                | 0              | 1.526217                | -1.496252 | -0.157368 |
| 5                | 6                | 0              | 2.449492                | -2.554706 | -0.109196 |
| 6                | 6                | 0              | 3.817465                | -2.314020 | 0.001012  |
| 7                | 1                | 0              | 5.370406                | -0.817151 | 0.142890  |
| 8                | 1                | 0              | 3.788248                | 1.069164  | -0.006725 |
| 9                | 1                | 0              | 2.097853                | -3.578557 | -0.136808 |
| 10               | 1                | 0              | 4.502990                | -3.155249 | 0.043120  |
| 11               | 7                | 0              | 0.136361                | -1.727907 | -0.274171 |
| 12               | 6                | 0              | -0.706587               | -1.262085 | 0.841612  |
| 13               | 1                | 0              | -0.235187               | -0.379150 | 1.281134  |
| 14               | 1                | 0              | -0.729107               | -2.025228 | 1.637388  |
| 15               | 6                | 0              | -0.270426               | -3.050139 | -0.750204 |
| 16               | 1                | 0              | -1.328991               | -3.014828 | -1.014334 |
| 17               | 1                | 0              | 0.297261                | -3.317648 | -1.643477 |
| 18               | 1                | 0              | -0.137826               | -3.839389 | 0.006537  |
| 19               | 6                | 0              | -2.134769               | -0.915750 | 0.452483  |
| 20               | 6                | 0              | -3.142986               | -1.002951 | 1.422186  |
| 21               | 6                | 0              | -2.473593               | -0.463133 | -0.828618 |
| 22               | 6                | 0              | -4.455073               | -0.631528 | 1.125735  |
| 23               | 1                | 0              | -2.897635               | -1.364057 | 2.418112  |
| 24               | 6                | 0              | -3.787837               | -0.098979 | -1.130707 |
| 25               | 1                | 0              | -1.706737               | -0.411969 | -1.594624 |
| 26               | 6                | 0              | -4.782514               | -0.177483 | -0.154212 |
| 27               | 1                | 0              | -5.222106               | -0.704725 | 1.891320  |
| 28               | 1                | 0              | -4.033248               | 0.245296  | -2.131323 |
| 29               | 1                | 0              | -5.804163               | 0.105836  | -0.389412 |
| 30               | 6                | 0              | 1.104482                | 0.950284  | -0.354596 |
| 31               | 6                | 0              | 1.157600                | 2.205132  | 0.143501  |
| 32               | 1                | 0              | 0.279396                | 0.736508  | -1.026630 |
| 33               | 7                | 0              | 0.161293                | 3.147340  | -0.378000 |
| 34               | 8                | 0              | 0.170717                | 4.293402  | 0.090982  |
| 35               | 8                | 0              | -0.636576               | 2.788387  | -1.253782 |
| 36               | 6                | 0              | 2.055492                | 2.772714  | 1.197277  |
| 37               | 1                | 0              | 2.589912                | 1.967772  | 1.702045  |
| 38               | 1                | 0              | 2.789850                | 3.469386  | 0.778581  |
| 39               | 1                | 0              | 1.470540                | 3.326397  | 1.934898  |

0502aaa\_Ph\_NMeBn\_CHC\_NO2\_Me\_ZW\_INT\_B3lyp631pd\_PCMdms0.log

Standard orientation:

| Center<br>Number | Atomic<br>Number | Atomic<br>Type | Coordinates (Angstroms) |           |           |
|------------------|------------------|----------------|-------------------------|-----------|-----------|
|                  |                  |                | X                       | Y         | Z         |
| 1                | 6                | 0              | 2.970295                | -2.605262 | -0.585929 |
| 2                | 6                | 0              | 2.700718                | -1.246090 | -0.691577 |
| 3                | 6                | 0              | 1.454299                | -0.706521 | -0.318711 |
| 4                | 6                | 0              | 0.496569                | -1.613700 | 0.160139  |
| 5                | 6                | 0              | 0.759718                | -2.984950 | 0.290710  |
| 6                | 6                | 0              | 1.999151                | -3.482836 | -0.086962 |
| 7                | 1                | 0              | 3.939785                | -2.988008 | -0.890442 |
| 8                | 1                | 0              | 3.443084                | -0.552288 | -1.076187 |
| 9                | 1                | 0              | -0.013050               | -3.650716 | 0.661568  |
| 10               | 1                | 0              | 2.202978                | -4.545196 | -0.003492 |
| 11               | 7                | 0              | -0.829966               | -1.150416 | 0.545519  |
| 12               | 6                | 0              | -1.597512               | -0.624182 | -0.372930 |
| 13               | 1                | 0              | -1.194438               | -0.708657 | -1.378115 |
| 14               | 6                | 0              | -1.198696               | -1.299429 | 1.965864  |
| 15               | 1                | 0              | -2.268714               | -1.478308 | 2.056674  |
| 16               | 1                | 0              | -0.648209               | -2.146916 | 2.368067  |
| 17               | 1                | 0              | -0.912362               | -0.401655 | 2.519374  |
| 18               | 6                | 0              | -2.889128               | 0.015821  | -0.267203 |
| 19               | 6                | 0              | -3.616272               | 0.094473  | -1.478201 |
| 20               | 6                | 0              | -3.441524               | 0.588376  | 0.901777  |
| 21               | 6                | 0              | -4.875794               | 0.678427  | -1.510599 |
| 22               | 1                | 0              | -3.187030               | -0.318209 | -2.385795 |
| 23               | 6                | 0              | -4.692373               | 1.190811  | 0.853198  |
| 24               | 1                | 0              | -2.888932               | 0.605845  | 1.830666  |
| 25               | 6                | 0              | -5.415882               | 1.225971  | -0.343757 |

|    |   |   |           |          |           |
|----|---|---|-----------|----------|-----------|
| 26 | 1 | 0 | -5.429871 | 0.718612 | -2.441995 |
| 27 | 1 | 0 | -5.103900 | 1.640425 | 1.750313  |
| 28 | 1 | 0 | -6.394976 | 1.693523 | -0.368371 |
| 29 | 6 | 0 | 1.261389  | 0.804662 | -0.419486 |
| 30 | 6 | 0 | 2.297842  | 1.597942 | 0.328381  |
| 31 | 1 | 0 | 1.316945  | 1.084735 | -1.476339 |
| 32 | 1 | 0 | 0.267302  | 1.087294 | -0.057368 |
| 33 | 7 | 0 | 3.372150  | 2.040163 | -0.327344 |
| 34 | 8 | 0 | 3.573963  | 1.738845 | -1.578174 |
| 35 | 8 | 0 | 4.239078  | 2.780884 | 0.280671  |
| 36 | 6 | 0 | 2.156809  | 1.943520 | 1.779684  |
| 37 | 1 | 0 | 1.276658  | 1.449759 | 2.203937  |
| 38 | 1 | 0 | 3.032431  | 1.636629 | 2.366484  |
| 39 | 1 | 0 | 2.045036  | 3.024878 | 1.947438  |

0503daa\_Ph\_NMeBn\_CHC\_NO2\_Me\_ZW\_INT\_B3lyp631pd\_PCMdms0\_TS\_CH.log

Standard orientation:

| Center<br>Number | Atomic<br>Number | Atomic<br>Type | Coordinates (Angstroms) |           |           |
|------------------|------------------|----------------|-------------------------|-----------|-----------|
|                  |                  |                | X                       | Y         | Z         |
| 1                | 6                | 0              | 4.161334                | -1.231135 | -0.469802 |
| 2                | 6                | 0              | 3.276836                | -0.166910 | -0.606789 |
| 3                | 6                | 0              | 1.893197                | -0.337482 | -0.445287 |
| 4                | 6                | 0              | 1.415632                | -1.624835 | -0.103825 |
| 5                | 6                | 0              | 2.310945                | -2.696709 | 0.044128  |
| 6                | 6                | 0              | 3.673306                | -2.501132 | -0.141181 |
| 7                | 1                | 0              | 5.224223                | -1.076158 | -0.625010 |
| 8                | 1                | 0              | 3.648707                | 0.823253  | -0.853510 |
| 9                | 1                | 0              | 1.933835                | -3.683980 | 0.287042  |
| 10               | 1                | 0              | 4.354355                | -3.339735 | -0.036972 |
| 11               | 7                | 0              | 0.025804                | -1.804288 | 0.138825  |
| 12               | 6                | 0              | -0.803775               | -1.007324 | -0.612115 |
| 13               | 1                | 0              | -0.568502               | -1.039285 | -1.676254 |
| 14               | 6                | 0              | -0.382744               | -2.443302 | 1.395087  |
| 15               | 1                | 0              | -1.443029               | -2.685248 | 1.350653  |
| 16               | 1                | 0              | 0.177035                | -3.370164 | 1.518893  |
| 17               | 1                | 0              | -0.187308               | -1.803049 | 2.262588  |
| 18               | 6                | 0              | -2.217275               | -0.738148 | -0.303445 |
| 19               | 6                | 0              | -3.146074               | -0.801311 | -1.359727 |
| 20               | 6                | 0              | -2.666342               | -0.341760 | 0.971912  |
| 21               | 6                | 0              | -4.491184               | -0.514903 | -1.139857 |
| 22               | 1                | 0              | -2.808281               | -1.086961 | -2.351525 |
| 23               | 6                | 0              | -4.010784               | -0.049646 | 1.184618  |
| 24               | 1                | 0              | -1.962497               | -0.237858 | 1.790191  |
| 25               | 6                | 0              | -4.927836               | -0.141147 | 0.133308  |
| 26               | 1                | 0              | -5.196841               | -0.580091 | -1.961968 |
| 27               | 1                | 0              | -4.342598               | 0.258544  | 2.171028  |
| 28               | 1                | 0              | -5.975190               | 0.087121  | 0.304494  |
| 29               | 6                | 0              | 0.978054                | 0.847268  | -0.594702 |
| 30               | 6                | 0              | 1.154837                | 1.962278  | 0.285075  |
| 31               | 1                | 0              | 0.839753                | 1.165929  | -1.630518 |
| 32               | 1                | 0              | -0.141009               | 0.320151  | -0.459950 |
| 33               | 7                | 0              | 0.736333                | 3.202945  | -0.167167 |
| 34               | 8                | 0              | 0.238080                | 3.338028  | -1.324934 |
| 35               | 8                | 0              | 0.866337                | 4.199234  | 0.601752  |
| 36               | 6                | 0              | 1.621886                | 1.881652  | 1.704936  |
| 37               | 1                | 0              | 1.813852                | 0.841739  | 1.977823  |
| 38               | 1                | 0              | 2.546129                | 2.448919  | 1.868042  |
| 39               | 1                | 0              | 0.876987                | 2.295462  | 2.394792  |

0508aaa\_Ph\_NMeBn\_CHC\_NO2\_Me\_product\_B3lyp631pd\_PCMdms0.log

Standard orientation:

| Center<br>Number | Atomic<br>Number | Atomic<br>Type | Coordinates (Angstroms) |           |           |
|------------------|------------------|----------------|-------------------------|-----------|-----------|
|                  |                  |                | X                       | Y         | Z         |
| 1                | 6                | 0              | 4.729979                | -0.132789 | 0.285187  |
| 2                | 6                | 0              | 3.766554                | 0.870994  | 0.189174  |
| 3                | 6                | 0              | 2.424757                | 0.577732  | -0.062729 |
| 4                | 6                | 0              | 2.010546                | -0.769164 | -0.189699 |
| 5                | 6                | 0              | 2.991975                | -1.779161 | -0.093644 |

|    |   |   |           |           |           |
|----|---|---|-----------|-----------|-----------|
| 6  | 6 | 0 | 4.328371  | -1.460874 | 0.137200  |
| 7  | 1 | 0 | 5.769497  | 0.117518  | 0.470850  |
| 8  | 1 | 0 | 4.056763  | 1.913429  | 0.295651  |
| 9  | 1 | 0 | 2.710387  | -2.820556 | -0.186440 |
| 10 | 1 | 0 | 5.056512  | -2.264049 | 0.206912  |
| 11 | 7 | 0 | 0.662322  | -1.106592 | -0.375484 |
| 12 | 6 | 0 | -0.356757 | -0.064658 | -0.564038 |
| 13 | 1 | 0 | -0.380584 | 0.263542  | -1.613035 |
| 14 | 6 | 0 | 0.391064  | -2.385273 | -1.042015 |
| 15 | 1 | 0 | -0.648000 | -2.415943 | -1.363237 |
| 16 | 1 | 0 | 1.031133  | -2.517749 | -1.923587 |
| 17 | 1 | 0 | 0.551592  | -3.231865 | -0.366759 |
| 18 | 6 | 0 | -1.756011 | -0.564362 | -0.208623 |
| 19 | 6 | 0 | -1.989252 | -1.392040 | 0.900033  |
| 20 | 6 | 0 | -2.846693 | -0.171974 | -0.995984 |
| 21 | 6 | 0 | -3.282857 | -1.804629 | 1.218786  |
| 22 | 1 | 0 | -1.150576 | -1.725765 | 1.502286  |
| 23 | 6 | 0 | -4.143129 | -0.580564 | -0.674989 |
| 24 | 1 | 0 | -2.681308 | 0.457194  | -1.865941 |
| 25 | 6 | 0 | -4.365178 | -1.397088 | 0.434428  |
| 26 | 1 | 0 | -3.445121 | -2.447911 | 2.078573  |
| 27 | 1 | 0 | -4.975482 | -0.266570 | -1.297685 |
| 28 | 1 | 0 | -5.371590 | -1.720806 | 0.682300  |
| 29 | 6 | 0 | 1.417548  | 1.687038  | -0.229759 |
| 30 | 6 | 0 | 0.038360  | 1.215256  | 0.257932  |
| 31 | 1 | 0 | 1.726932  | 2.575112  | 0.330716  |
| 32 | 1 | 0 | 1.331899  | 1.980584  | -1.281287 |
| 33 | 7 | 0 | -0.969937 | 2.301348  | -0.157241 |
| 34 | 8 | 0 | -1.010640 | 2.604804  | -1.350807 |
| 35 | 8 | 0 | -1.678840 | 2.814058  | 0.702715  |
| 36 | 6 | 0 | -0.008201 | 1.047503  | 1.771674  |
| 37 | 1 | 0 | 0.296088  | 1.974203  | 2.262876  |
| 38 | 1 | 0 | -1.004000 | 0.780546  | 2.121971  |
| 39 | 1 | 0 | 0.688538  | 0.259207  | 2.062058  |

0508aba\_Ph\_NMeBn\_CHC\_NO2\_Me\_product\_B3lyp631pd\_PCmDmso.log

Standard orientation:

| Center<br>Number | Atomic<br>Number | Atomic<br>Type | Coordinates (Angstroms) |           |           |
|------------------|------------------|----------------|-------------------------|-----------|-----------|
|                  |                  |                | X                       | Y         | Z         |
| 1                | 6                | 0              | 4.729998                | -0.132698 | 0.285117  |
| 2                | 6                | 0              | 3.766565                | 0.871029  | 0.188874  |
| 3                | 6                | 0              | 2.424787                | 0.577709  | -0.063056 |
| 4                | 6                | 0              | 2.010507                | -0.769177 | -0.189859 |
| 5                | 6                | 0              | 2.991992                | -1.779165 | -0.093503 |
| 6                | 6                | 0              | 4.328341                | -1.460820 | 0.137380  |
| 7                | 1                | 0              | 5.769518                | 0.117610  | 0.470737  |
| 8                | 1                | 0              | 4.056698                | 1.913503  | 0.295199  |
| 9                | 1                | 0              | 2.710489                | -2.820591 | -0.186076 |
| 10               | 1                | 0              | 5.056471                | -2.263990 | 0.207318  |
| 11               | 7                | 0              | 0.662274                | -1.106569 | -0.375736 |
| 12               | 6                | 0              | -0.356780               | -0.064621 | -0.564234 |
| 13               | 1                | 0              | -0.380674               | 0.263656  | -1.613193 |
| 14               | 6                | 0              | 0.390927                | -2.385522 | -1.041614 |
| 15               | 1                | 0              | -0.647943               | -2.416098 | -1.363511 |
| 16               | 1                | 0              | 1.031422                | -2.518756 | -1.922761 |
| 17               | 1                | 0              | 0.550813                | -3.231825 | -0.365822 |
| 18               | 6                | 0              | -1.756088               | -0.564145 | -0.208749 |
| 19               | 6                | 0              | -1.989253               | -1.391410 | 0.900256  |
| 20               | 6                | 0              | -2.846775               | -0.172239 | -0.996315 |
| 21               | 6                | 0              | -3.282783               | -1.804116 | 1.219120  |
| 22               | 1                | 0              | -1.150472               | -1.724673 | 1.502622  |
| 23               | 6                | 0              | -4.143145               | -0.580959 | -0.675211 |
| 24               | 1                | 0              | -2.681484               | 0.456649  | -1.866487 |
| 25               | 6                | 0              | -4.365113               | -1.397095 | 0.434511  |
| 26               | 1                | 0              | -3.444947               | -2.447110 | 2.079140  |
| 27               | 1                | 0              | -4.975556               | -0.267357 | -1.298029 |
| 28               | 1                | 0              | -5.371502               | -1.720874 | 0.682399  |
| 29               | 6                | 0              | 1.417490                | 1.687044  | -0.230074 |
| 30               | 6                | 0              | 0.038598                | 1.215109  | 0.257837  |
| 31               | 1                | 0              | 1.726973                | 2.575132  | 0.330316  |
| 32               | 1                | 0              | 1.331737                | 1.980575  | -1.281607 |
| 33               | 7                | 0              | -0.970086               | 2.301357  | -0.157064 |

|    |   |   |           |          |           |
|----|---|---|-----------|----------|-----------|
| 34 | 8 | 0 | -1.011023 | 2.604884 | -1.350530 |
| 35 | 8 | 0 | -1.678760 | 2.813957 | 0.703091  |
| 36 | 6 | 0 | -0.007725 | 1.047231 | 1.771576  |
| 37 | 1 | 0 | 0.297008  | 1.973766 | 2.262757  |
| 38 | 1 | 0 | -1.003559 | 0.780600 | 2.121964  |
| 39 | 1 | 0 | 0.688690  | 0.258594 | 2.061812  |

0508abb\_Ph\_NMeBn\_CHC\_NO2\_Me\_product\_B3lyp631pd\_PCmDmso.log

Standard orientation:

| Center<br>Number | Atomic<br>Number | Atomic<br>Type | Coordinates (Angstroms) |           |           |
|------------------|------------------|----------------|-------------------------|-----------|-----------|
|                  |                  |                | X                       | Y         | Z         |
| 1                | 6                | 0              | -4.648455               | -0.235011 | -0.155531 |
| 2                | 6                | 0              | -3.739013               | 0.760387  | 0.201502  |
| 3                | 6                | 0              | -2.378980               | 0.490888  | 0.363492  |
| 4                | 6                | 0              | -1.889066               | -0.815861 | 0.141635  |
| 5                | 6                | 0              | -2.816550               | -1.820112 | -0.212466 |
| 6                | 6                | 0              | -4.171674               | -1.529882 | -0.358311 |
| 7                | 1                | 0              | -5.702495               | -0.003573 | -0.271111 |
| 8                | 1                | 0              | -4.088256               | 1.776429  | 0.370869  |
| 9                | 1                | 0              | -2.481474               | -2.833819 | -0.389543 |
| 10               | 1                | 0              | -4.854030               | -2.328580 | -0.635465 |
| 11               | 7                | 0              | -0.522713               | -1.108338 | 0.230146  |
| 12               | 6                | 0              | 0.427183                | -0.135889 | 0.787069  |
| 13               | 1                | 0              | 0.410267                | -0.186405 | 1.887917  |
| 14               | 6                | 0              | -0.167127               | -2.516546 | 0.427853  |
| 15               | 1                | 0              | 0.889875                | -2.597019 | 0.670138  |
| 16               | 1                | 0              | -0.745828               | -2.968189 | 1.244885  |
| 17               | 1                | 0              | -0.340824               | -3.099916 | -0.481717 |
| 18               | 6                | 0              | 1.859759                | -0.435366 | 0.344209  |
| 19               | 6                | 0              | 2.172791                | -0.697149 | -0.998139 |
| 20               | 6                | 0              | 2.892770                | -0.439761 | 1.290093  |
| 21               | 6                | 0              | 3.490463                | -0.943388 | -1.382913 |
| 22               | 1                | 0              | 1.379280                | -0.721393 | -1.737782 |
| 23               | 6                | 0              | 4.213245                | -0.682946 | 0.905257  |
| 24               | 1                | 0              | 2.662805                | -0.258237 | 2.336566  |
| 25               | 6                | 0              | 4.515768                | -0.933831 | -0.433607 |
| 26               | 1                | 0              | 3.716178                | -1.145860 | -2.425714 |
| 27               | 1                | 0              | 5.000422                | -0.683631 | 1.653196  |
| 28               | 1                | 0              | 5.540663                | -1.128259 | -0.735037 |
| 29               | 6                | 0              | -1.454341               | 1.583735  | 0.828889  |
| 30               | 6                | 0              | 0.031223                | 1.357174  | 0.510352  |
| 31               | 1                | 0              | -1.765591               | 2.554412  | 0.428244  |
| 32               | 1                | 0              | -1.515308               | 1.678116  | 1.920351  |
| 33               | 7                | 0              | 0.241875                | 1.667898  | -0.980000 |
| 34               | 8                | 0              | -0.489552               | 1.099172  | -1.789426 |
| 35               | 8                | 0              | 1.129083                | 2.457023  | -1.300513 |
| 36               | 6                | 0              | 0.900306                | 2.313673  | 1.326422  |
| 37               | 1                | 0              | 1.956485                | 2.221596  | 1.078385  |
| 38               | 1                | 0              | 0.590736                | 3.346282  | 1.151637  |
| 39               | 1                | 0              | 0.766894                | 2.090878  | 2.387838  |

0601aaa\_Ph\_NMeBn\_CHC\_CN\_CN\_B3lyp631pd\_PCmDmso.log

Standard orientation:

| Center<br>Number | Atomic<br>Number | Atomic<br>Type | Coordinates (Angstroms) |           |           |
|------------------|------------------|----------------|-------------------------|-----------|-----------|
|                  |                  |                | X                       | Y         | Z         |
| 1                | 6                | 0              | 4.182038                | -0.898410 | -0.052076 |
| 2                | 6                | 0              | 3.262955                | 0.135963  | -0.089091 |
| 3                | 6                | 0              | 1.872103                | -0.113686 | -0.153823 |
| 4                | 6                | 0              | 1.403630                | -1.469454 | -0.119498 |
| 5                | 6                | 0              | 2.360931                | -2.502478 | -0.111814 |
| 6                | 6                | 0              | 3.721345                | -2.220979 | -0.078836 |
| 7                | 1                | 0              | 5.244928                | -0.684431 | -0.026529 |
| 8                | 1                | 0              | 3.619709                | 1.157779  | -0.128605 |
| 9                | 1                | 0              | 2.039158                | -3.535666 | -0.094079 |
| 10               | 1                | 0              | 4.430443                | -3.043029 | -0.055362 |
| 11               | 7                | 0              | 0.031384                | -1.750779 | -0.117664 |
| 12               | 6                | 0              | -0.811649               | -1.173363 | 0.943334  |
| 13               | 1                | 0              | -0.278802               | -0.331794 | 1.393392  |

|    |   |   |           |           |           |
|----|---|---|-----------|-----------|-----------|
| 14 | 1 | 0 | -0.934820 | -1.914913 | 1.748421  |
| 15 | 6 | 0 | -0.383034 | -3.108855 | -0.473817 |
| 16 | 1 | 0 | -1.458184 | -3.103465 | -0.661178 |
| 17 | 1 | 0 | 0.121021  | -3.430563 | -1.386732 |
| 18 | 1 | 0 | -0.180770 | -3.837004 | 0.325607  |
| 19 | 6 | 0 | -2.187458 | -0.711034 | 0.486928  |
| 20 | 6 | 0 | -3.164788 | -0.453469 | 1.459316  |
| 21 | 6 | 0 | -2.507411 | -0.501017 | -0.859101 |
| 22 | 6 | 0 | -4.425761 | 0.017294  | 1.096040  |
| 23 | 1 | 0 | -2.934300 | -0.621649 | 2.508650  |
| 24 | 6 | 0 | -3.773535 | -0.034518 | -1.225959 |
| 25 | 1 | 0 | -1.767901 | -0.716973 | -1.624164 |
| 26 | 6 | 0 | -4.735122 | 0.229268  | -0.250908 |
| 27 | 1 | 0 | -5.169037 | 0.213841  | 1.863201  |
| 28 | 1 | 0 | -4.005020 | 0.118980  | -2.275957 |
| 29 | 1 | 0 | -5.718552 | 0.591261  | -0.535371 |
| 30 | 6 | 0 | 0.923119  | 0.942836  | -0.403958 |
| 31 | 6 | 0 | 1.010573  | 2.293087  | -0.167421 |
| 32 | 1 | 0 | -0.004271 | 0.624235  | -0.871367 |
| 33 | 6 | 0 | -0.043815 | 3.156257  | -0.607073 |
| 34 | 7 | 0 | -0.897406 | 3.865385  | -0.960226 |
| 35 | 6 | 0 | 2.072753  | 2.943208  | 0.535576  |
| 36 | 7 | 0 | 2.913901  | 3.503891  | 1.114055  |

0602bab\_Ph\_NMeBn\_CHC\_CN\_CN\_ZWion\_B3lyp631pd\_PCMdms0.log

Standard orientation:

| Center<br>Number | Atomic<br>Number | Atomic<br>Type | Coordinates (Angstroms) |           |           |
|------------------|------------------|----------------|-------------------------|-----------|-----------|
|                  |                  |                | X                       | Y         | Z         |
| 1                | 6                | 0              | -2.811940               | 2.745128  | 0.469403  |
| 2                | 6                | 0              | -2.879485               | 1.377615  | 0.200820  |
| 3                | 6                | 0              | -1.750925               | 0.642448  | -0.179116 |
| 4                | 6                | 0              | -0.543209               | 1.354982  | -0.269225 |
| 5                | 6                | 0              | -0.451087               | 2.721542  | 0.002271  |
| 6                | 6                | 0              | -1.596155               | 3.422681  | 0.375421  |
| 7                | 1                | 0              | -3.711068               | 3.280474  | 0.758643  |
| 8                | 1                | 0              | -3.819479               | 0.845483  | 0.300792  |
| 9                | 1                | 0              | 0.505400                | 3.225640  | -0.091105 |
| 10               | 1                | 0              | -1.534072               | 4.484835  | 0.587293  |
| 11               | 7                | 0              | 0.680337                | 0.666789  | -0.673415 |
| 12               | 6                | 0              | 1.623712                | 0.510635  | 0.218734  |
| 13               | 1                | 0              | 1.356960                | 0.900642  | 1.196719  |
| 14               | 6                | 0              | 0.789046                | 0.286898  | -2.097191 |
| 15               | 1                | 0              | 1.721295                | 0.678863  | -2.506796 |
| 16               | 1                | 0              | 0.753150                | -0.798254 | -2.207208 |
| 17               | 1                | 0              | -0.049329               | 0.732145  | -2.626933 |
| 18               | 6                | 0              | 2.942870                | -0.066710 | 0.126783  |
| 19               | 6                | 0              | 3.746736                | 0.132398  | 1.276307  |
| 20               | 6                | 0              | 3.477482                | -0.802440 | -0.958228 |
| 21               | 6                | 0              | 5.044692                | -0.356182 | 1.330413  |
| 22               | 1                | 0              | 3.341882                | 0.680694  | 2.120986  |
| 23               | 6                | 0              | 4.773036                | -1.297486 | -0.888311 |
| 24               | 1                | 0              | 2.891457                | -1.014001 | -1.839714 |
| 25               | 6                | 0              | 5.560022                | -1.071230 | 0.246212  |
| 26               | 1                | 0              | 5.650255                | -0.187403 | 2.214021  |
| 27               | 1                | 0              | 5.171894                | -1.866203 | -1.721146 |
| 28               | 1                | 0              | 6.572245                | -1.460610 | 0.286518  |
| 29               | 6                | 0              | -1.831178               | -0.858777 | -0.470543 |
| 30               | 6                | 0              | -3.023039               | -1.599866 | 0.106064  |
| 31               | 1                | 0              | -1.837260               | -0.996069 | -1.559617 |
| 32               | 6                | 0              | -4.121776               | -1.920438 | -0.694480 |
| 33               | 7                | 0              | -5.037820               | -2.192528 | -1.384753 |
| 34               | 6                | 0              | -3.032743               | -1.973288 | 1.453155  |
| 35               | 7                | 0              | -3.015210               | -2.283933 | 2.589597  |
| 36               | 1                | 0              | -0.900832               | -1.325989 | -0.123388 |

0602bbb\_Ph\_NMeBn\_CHC\_CN\_CN\_ZWion\_B3lyp631pd\_PCMdms0.log

Standard orientation:

| Center<br>Number | Atomic<br>Number | Atomic<br>Type | Coordinates (Angstroms) |   |   |
|------------------|------------------|----------------|-------------------------|---|---|
|                  |                  |                | X                       | Y | Z |

|    |   |   |           |           |           |
|----|---|---|-----------|-----------|-----------|
| 1  | 6 | 0 | -2.869544 | 2.634952  | -0.803722 |
| 2  | 6 | 0 | -2.917902 | 1.331746  | -0.308672 |
| 3  | 6 | 0 | -1.773054 | 0.674056  | 0.156530  |
| 4  | 6 | 0 | -0.569213 | 1.396082  | 0.090349  |
| 5  | 6 | 0 | -0.495620 | 2.696737  | -0.413798 |
| 6  | 6 | 0 | -1.656510 | 3.321969  | -0.863675 |
| 7  | 1 | 0 | -3.781173 | 3.111363  | -1.151027 |
| 8  | 1 | 0 | -3.856166 | 0.787384  | -0.294119 |
| 9  | 1 | 0 | 0.460386  | 3.209757  | -0.439939 |
| 10 | 1 | 0 | -1.609110 | 4.332438  | -1.255574 |
| 11 | 7 | 0 | 0.673202  | 0.795725  | 0.567831  |
| 12 | 6 | 0 | 1.570073  | 0.443997  | -0.315814 |
| 13 | 1 | 0 | 1.223413  | 0.532426  | -1.341598 |
| 14 | 6 | 0 | 0.837503  | 0.699905  | 2.031325  |
| 15 | 1 | 0 | 1.357285  | -0.222033 | 2.289580  |
| 16 | 1 | 0 | 1.390732  | 1.568116  | 2.397142  |
| 17 | 1 | 0 | -0.151915 | 0.702335  | 2.481906  |
| 18 | 6 | 0 | 2.913191  | -0.060090 | -0.151990 |
| 19 | 6 | 0 | 3.458935  | -0.671904 | -1.305956 |
| 20 | 6 | 0 | 3.710320  | 0.036747  | 1.012923  |
| 21 | 6 | 0 | 4.738428  | -1.210400 | -1.284731 |
| 22 | 1 | 0 | 2.863142  | -0.729457 | -2.211420 |
| 23 | 6 | 0 | 4.996776  | -0.486840 | 1.016355  |
| 24 | 1 | 0 | 3.354601  | 0.547118  | 1.896295  |
| 25 | 6 | 0 | 5.508230  | -1.119501 | -0.122005 |
| 26 | 1 | 0 | 5.139069  | -1.689180 | -2.171451 |
| 27 | 1 | 0 | 5.606900  | -0.398167 | 1.908593  |
| 28 | 1 | 0 | 6.512613  | -1.530292 | -0.104794 |
| 29 | 6 | 0 | -1.842653 | -0.756451 | 0.696788  |
| 30 | 6 | 0 | -2.960259 | -1.626537 | 0.149714  |
| 31 | 1 | 0 | -0.872936 | -1.240007 | 0.526999  |
| 32 | 6 | 0 | -2.861512 | -2.166803 | -1.135743 |
| 33 | 7 | 0 | -2.752412 | -2.615218 | -2.219834 |
| 34 | 6 | 0 | -4.093818 | -1.902913 | 0.917004  |
| 35 | 7 | 0 | -5.040905 | -2.135275 | 1.579514  |
| 36 | 1 | 0 | -1.956264 | -0.706945 | 1.787541  |

0602dcb\_Ph\_NMeBn\_CHC\_CN\_CN\_ZWion\_B3lyp631pd\_PCMdmso\_TS\_HC\_f.log

Standard orientation:

| Center Number | Atomic Number | Atomic Type | Coordinates (Angstroms) |           |           |
|---------------|---------------|-------------|-------------------------|-----------|-----------|
|               |               |             | X                       | Y         | Z         |
| 1             | 6             | 0           | -4.196431               | -0.894909 | -0.564980 |
| 2             | 6             | 0           | -3.260293               | 0.108822  | -0.786808 |
| 3             | 6             | 0           | -1.887527               | -0.122779 | -0.609293 |
| 4             | 6             | 0           | -1.473254               | -1.396636 | -0.152396 |
| 5             | 6             | 0           | -2.422467               | -2.403950 | 0.080914  |
| 6             | 6             | 0           | -3.772652               | -2.155474 | -0.129132 |
| 7             | 1             | 0           | -5.249899               | -0.700379 | -0.737724 |
| 8             | 1             | 0           | -3.581594               | 1.091957  | -1.117039 |
| 9             | 1             | 0           | -2.095294               | -3.382909 | 0.413253  |
| 10            | 1             | 0           | -4.495700               | -2.946578 | 0.041757  |
| 11            | 7             | 0           | -0.099167               | -1.614479 | 0.133039  |
| 12            | 6             | 0           | 0.772901                | -0.896965 | -0.663613 |
| 13            | 1             | 0           | 0.593455                | -1.063546 | -1.727543 |
| 14            | 6             | 0           | 0.252056                | -2.108670 | 1.470353  |
| 15            | 1             | 0           | 1.305388                | -2.382278 | 1.490256  |
| 16            | 1             | 0           | 0.049772                | -1.363726 | 2.248427  |
| 17            | 1             | 0           | -0.339328               | -2.999099 | 1.683377  |
| 18            | 6             | 0           | 2.190913                | -0.654406 | -0.321484 |
| 19            | 6             | 0           | 3.166242                | -0.921514 | -1.298516 |
| 20            | 6             | 0           | 2.589992                | -0.090767 | 0.905012  |
| 21            | 6             | 0           | 4.512183                | -0.668813 | -1.041606 |
| 22            | 1             | 0           | 2.865804                | -1.337892 | -2.255434 |
| 23            | 6             | 0           | 3.935439                | 0.168093  | 1.153914  |
| 24            | 1             | 0           | 1.848460                | 0.163880  | 1.654482  |
| 25            | 6             | 0           | 4.899717                | -0.125497 | 0.185386  |
| 26            | 1             | 0           | 5.256258                | -0.891584 | -1.799694 |
| 27            | 1             | 0           | 4.231178                | 0.606341  | 2.101765  |
| 28            | 1             | 0           | 5.947587                | 0.077087  | 0.383778  |
| 29            | 6             | 0           | -0.913842               | 0.995757  | -0.848945 |
| 30            | 6             | 0           | -1.008236               | 2.179719  | -0.037292 |

|    |   |   |           |          |           |
|----|---|---|-----------|----------|-----------|
| 31 | 1 | 0 | -0.736076 | 1.208997 | -1.905789 |
| 32 | 6 | 0 | -0.511888 | 3.416135 | -0.510405 |
| 33 | 7 | 0 | -0.106287 | 4.436588 | -0.914987 |
| 34 | 6 | 0 | -1.461321 | 2.121880 | 1.301100  |
| 35 | 7 | 0 | -1.832821 | 2.069833 | 2.409669  |
| 36 | 1 | 0 | 0.198728  | 0.375978 | -0.661183 |

0602fab\_Ph\_NMeBn\_CHC\_CN\_CN\_ZWion\_B3lyp631pd\_PCmDmso\_scan\_HC\_vege.log

Standard orientation:

| Center Number | Atomic Number | Atomic Type | Coordinates (Angstroms) |           |           |
|---------------|---------------|-------------|-------------------------|-----------|-----------|
|               |               |             | X                       | Y         | Z         |
| 1             | 6             | 0           | -1.525447               | 3.179005  | 0.378050  |
| 2             | 6             | 0           | -2.082003               | 1.910146  | 0.362873  |
| 3             | 6             | 0           | -1.435650               | 0.836637  | -0.291297 |
| 4             | 6             | 0           | -0.151912               | 1.053680  | -0.888700 |
| 5             | 6             | 0           | 0.374632                | 2.357641  | -0.890434 |
| 6             | 6             | 0           | -0.301956               | 3.400895  | -0.267543 |
| 7             | 1             | 0           | -2.046379               | 3.996449  | 0.864698  |
| 8             | 1             | 0           | -3.057009               | 1.754184  | 0.808448  |
| 9             | 1             | 0           | 1.336837                | 2.547839  | -1.350072 |
| 10            | 1             | 0           | 0.137963                | 4.393667  | -0.267673 |
| 11            | 7             | 0           | 0.526794                | -0.022404 | -1.480568 |
| 12            | 6             | 0           | 0.942103                | -1.161813 | -0.620609 |
| 13            | 1             | 0           | 0.143153                | -1.359366 | 0.095525  |
| 14            | 6             | 0           | 1.489062                | 0.286481  | -2.537951 |
| 15            | 1             | 0           | 2.442866                | 0.685344  | -2.166874 |
| 16            | 1             | 0           | 1.702844                | -0.634117 | -3.088266 |
| 17            | 1             | 0           | 1.050771                | 1.006802  | -3.231372 |
| 18            | 6             | 0           | 2.250213                | -0.945824 | 0.122642  |
| 19            | 6             | 0           | 2.293025                | -0.147316 | 1.275811  |
| 20            | 6             | 0           | 3.437812                | -1.534117 | -0.331217 |
| 21            | 6             | 0           | 3.494655                | 0.062028  | 1.952915  |
| 22            | 1             | 0           | 1.379336                | 0.306108  | 1.650178  |
| 23            | 6             | 0           | 4.642636                | -1.328141 | 0.345156  |
| 24            | 1             | 0           | 3.418007                | -2.164061 | -1.217024 |
| 25            | 6             | 0           | 4.673761                | -0.527275 | 1.487934  |
| 26            | 1             | 0           | 3.510308                | 0.678820  | 2.846753  |
| 27            | 1             | 0           | 5.553317                | -1.794558 | -0.019117 |
| 28            | 1             | 0           | 5.608539                | -0.367075 | 2.016960  |
| 29            | 6             | 0           | -2.084373               | -0.430525 | -0.525516 |
| 30            | 6             | 0           | -3.104938               | -1.046552 | 0.155206  |
| 31            | 1             | 0           | -1.709881               | -0.970434 | -1.392265 |
| 32            | 6             | 0           | -3.650747               | -2.271825 | -0.345609 |
| 33            | 7             | 0           | -4.096955               | -3.269672 | -0.747265 |
| 34            | 6             | 0           | -3.672536               | -0.582358 | 1.383213  |
| 35            | 7             | 0           | -4.147741               | -0.236757 | 2.388744  |
| 36            | 1             | 0           | 1.024607                | -2.042382 | -1.265822 |

0603aaa\_Ph\_NMeBn\_CHC\_CN\_CN\_ZWion\_B3lyp631pd\_PCmDmso.log

Standard orientation:

| Center Number | Atomic Number | Atomic Type | Coordinates (Angstroms) |           |           |
|---------------|---------------|-------------|-------------------------|-----------|-----------|
|               |               |             | X                       | Y         | Z         |
| 1             | 6             | 0           | 4.660614                | -0.134293 | -0.112511 |
| 2             | 6             | 0           | 3.731878                | 0.885182  | 0.088129  |
| 3             | 6             | 0           | 2.374691                | 0.612359  | 0.273246  |
| 4             | 6             | 0           | 1.908372                | -0.721905 | 0.226521  |
| 5             | 6             | 0           | 2.856059                | -1.747145 | 0.022308  |
| 6             | 6             | 0           | 4.207603                | -1.453519 | -0.141288 |
| 7             | 1             | 0           | 5.712328                | 0.097191  | -0.244861 |
| 8             | 1             | 0           | 4.060320                | 1.921038  | 0.116225  |
| 9             | 1             | 0           | 2.537974                | -2.780751 | -0.020303 |
| 10            | 1             | 0           | 4.907583                | -2.269238 | -0.297309 |
| 11            | 7             | 0           | 0.542597                | -1.035081 | 0.343846  |
| 12            | 6             | 0           | -0.433648               | 0.001267  | 0.684276  |
| 13            | 1             | 0           | -0.426212               | 0.221661  | 1.763123  |
| 14            | 6             | 0           | 0.216744                | -2.389019 | 0.808860  |
| 15            | 1             | 0           | -0.835178               | -2.438221 | 1.080782  |
| 16            | 1             | 0           | 0.388306                | -3.128921 | 0.021371  |

|    |   |   |           |           |           |
|----|---|---|-----------|-----------|-----------|
| 17 | 1 | 0 | 0.816486  | -2.664847 | 1.685316  |
| 18 | 6 | 0 | -1.856321 | -0.383354 | 0.295040  |
| 19 | 6 | 0 | -2.904678 | -0.124106 | 1.186573  |
| 20 | 6 | 0 | -2.146735 | -0.966078 | -0.947254 |
| 21 | 6 | 0 | -4.223091 | -0.425683 | 0.839635  |
| 22 | 1 | 0 | -2.689550 | 0.311855  | 2.158280  |
| 23 | 6 | 0 | -3.463524 | -1.269059 | -1.292438 |
| 24 | 1 | 0 | -1.339733 | -1.195581 | -1.634667 |
| 25 | 6 | 0 | -4.505371 | -0.996687 | -0.402000 |
| 26 | 1 | 0 | -5.024991 | -0.220264 | 1.542056  |
| 27 | 1 | 0 | -3.675168 | -1.722153 | -2.256196 |
| 28 | 1 | 0 | -5.529481 | -1.235871 | -0.672020 |
| 29 | 6 | 0 | 1.413987  | 1.742508  | 0.538450  |
| 30 | 6 | 0 | -0.001436 | 1.368988  | 0.014541  |
| 31 | 1 | 0 | 1.314181  | 1.945179  | 1.610651  |
| 32 | 6 | 0 | 0.025959  | 1.273229  | -1.459677 |
| 33 | 7 | 0 | 0.076718  | 1.223300  | -2.617424 |
| 34 | 6 | 0 | -0.957652 | 2.427425  | 0.387769  |
| 35 | 7 | 0 | -1.675018 | 3.281867  | 0.705138  |
| 36 | 1 | 0 | 1.752329  | 2.667651  | 0.065552  |

0603aab\_Ph\_NMeBn\_CHC\_CN\_CN\_ZWion\_B3lyp631pd\_PCMdmsol.log

Standard orientation:

| Center<br>Number | Atomic<br>Number | Atomic<br>Type | Coordinates (Angstroms) |           |           |
|------------------|------------------|----------------|-------------------------|-----------|-----------|
|                  |                  |                | X                       | Y         | Z         |
| 1                | 6                | 0              | 2.811940                | -2.745128 | 0.469403  |
| 2                | 6                | 0              | 2.879485                | -1.377615 | 0.200820  |
| 3                | 6                | 0              | 1.750925                | -0.642448 | -0.179116 |
| 4                | 6                | 0              | 0.543209                | -1.354982 | -0.269225 |
| 5                | 6                | 0              | 0.451087                | -2.721542 | 0.002271  |
| 6                | 6                | 0              | 1.596155                | -3.422681 | 0.375421  |
| 7                | 1                | 0              | 3.711068                | -3.280474 | 0.758643  |
| 8                | 1                | 0              | 3.819479                | -0.845483 | 0.300792  |
| 9                | 1                | 0              | -0.505400               | -3.225640 | -0.091105 |
| 10               | 1                | 0              | 1.534072                | -4.484835 | 0.587293  |
| 11               | 7                | 0              | -0.680337               | -0.666789 | -0.673415 |
| 12               | 6                | 0              | -1.623712               | -0.510635 | 0.218734  |
| 13               | 1                | 0              | -1.356960               | -0.900642 | 1.196719  |
| 14               | 6                | 0              | -0.789046               | -0.286898 | -2.097191 |
| 15               | 1                | 0              | -1.721295               | -0.678863 | -2.506796 |
| 16               | 1                | 0              | -0.753150               | 0.798254  | -2.207208 |
| 17               | 1                | 0              | 0.049329                | -0.732145 | -2.626933 |
| 18               | 6                | 0              | -2.942870               | 0.066710  | 0.126783  |
| 19               | 6                | 0              | -3.746736               | -0.132398 | 1.276307  |
| 20               | 6                | 0              | -3.477482               | 0.802440  | -0.958228 |
| 21               | 6                | 0              | -5.044692               | 0.356182  | 1.330413  |
| 22               | 1                | 0              | -3.341882               | -0.680694 | 2.120986  |
| 23               | 6                | 0              | -4.773036               | 1.297486  | -0.888311 |
| 24               | 1                | 0              | -2.891457               | 1.014001  | -1.839714 |
| 25               | 6                | 0              | -5.560022               | 1.071230  | 0.246212  |
| 26               | 1                | 0              | -5.650255               | 0.187403  | 2.214021  |
| 27               | 1                | 0              | -5.171894               | 1.866203  | -1.721146 |
| 28               | 1                | 0              | -6.572245               | 1.460610  | 0.286518  |
| 29               | 6                | 0              | 1.831178                | 0.858777  | -0.470543 |
| 30               | 6                | 0              | 3.023039                | 1.599866  | 0.106064  |
| 31               | 1                | 0              | 1.837260                | 0.996069  | -1.559617 |
| 32               | 6                | 0              | 4.121776                | 1.920438  | -0.694480 |
| 33               | 7                | 0              | 5.037820                | 2.192528  | -1.384753 |
| 34               | 6                | 0              | 3.032743                | 1.973288  | 1.453155  |
| 35               | 7                | 0              | 3.015210                | 2.283933  | 2.589597  |
| 36               | 1                | 0              | 0.900832                | 1.325989  | -0.123388 |

0609aaa\_Ph\_NMeBn\_CHC\_CN\_CN\_product\_B3lyp631pd\_PCMdmsol.log

Standard orientation:

| Center<br>Number | Atomic<br>Number | Atomic<br>Type | Coordinates (Angstroms) |           |           |
|------------------|------------------|----------------|-------------------------|-----------|-----------|
|                  |                  |                | X                       | Y         | Z         |
| 1                | 6                | 0              | 4.660626                | -0.134130 | 0.112851  |
| 2                | 6                | 0              | 3.731861                | 0.885307  | -0.087726 |



|    |   |   |           |           |           |
|----|---|---|-----------|-----------|-----------|
| 3  | 6 | 0 | 2.374705  | 0.612435  | -0.273081 |
| 4  | 6 | 0 | 1.908448  | -0.721867 | -0.226696 |
| 5  | 6 | 0 | 2.856193  | -1.747061 | -0.022545 |
| 6  | 6 | 0 | 4.207692  | -1.453398 | 0.141311  |
| 7  | 1 | 0 | 5.712303  | 0.097404  | 0.245398  |
| 8  | 1 | 0 | 4.060211  | 1.921200  | -0.115598 |
| 9  | 1 | 0 | 2.538207  | -2.780703 | 0.019853  |
| 10 | 1 | 0 | 4.907676  | -2.269111 | 0.297317  |
| 11 | 7 | 0 | 0.542662  | -1.035043 | -0.344122 |
| 12 | 6 | 0 | -0.433577 | 0.001148  | -0.684435 |
| 13 | 1 | 0 | -0.426308 | 0.221549  | -1.763305 |
| 14 | 6 | 0 | 0.216765  | -2.389092 | -0.809033 |
| 15 | 1 | 0 | -0.835363 | -2.438385 | -1.080078 |
| 16 | 1 | 0 | 0.815944  | -2.664624 | -1.685939 |
| 17 | 1 | 0 | 0.389047  | -3.128872 | -0.021623 |
| 18 | 6 | 0 | -1.856225 | -0.383446 | -0.295098 |
| 19 | 6 | 0 | -2.904615 | -0.124229 | -1.186529 |
| 20 | 6 | 0 | -2.146562 | -0.966170 | 0.947287  |
| 21 | 6 | 0 | -4.223054 | -0.425717 | -0.839452 |
| 22 | 1 | 0 | -2.689564 | 0.311643  | -2.158293 |
| 23 | 6 | 0 | -3.463287 | -1.269043 | 1.292585  |
| 24 | 1 | 0 | -1.339431 | -1.195713 | 1.634525  |
| 25 | 6 | 0 | -4.505236 | -0.996614 | 0.402201  |
| 26 | 1 | 0 | -5.024973 | -0.220289 | -1.541849 |
| 27 | 1 | 0 | -3.675002 | -1.722097 | 2.256347  |
| 28 | 1 | 0 | -5.529308 | -1.235735 | 0.672426  |
| 29 | 6 | 0 | 1.413929  | 1.742534  | -0.538230 |
| 30 | 6 | 0 | -0.001417 | 1.368988  | -0.014672 |
| 31 | 1 | 0 | 1.752192  | 2.667670  | -0.065208 |
| 32 | 6 | 0 | 0.025672  | 1.273186  | 1.459642  |
| 33 | 7 | 0 | 0.076048  | 1.223244  | 2.617401  |
| 34 | 1 | 0 | 1.314387  | 1.945447  | -1.610428 |
| 35 | 6 | 0 | -0.957675 | 2.427472  | -0.387886 |
| 36 | 7 | 0 | -1.675208 | 3.281628  | -0.705637 |

0621aaa\_Ph\_NPiperidin\_CHC\_CN\_CN\_B3lyp631pd\_PCMdms0.log

Standard orientation:

| Center<br>Number | Atomic<br>Number | Atomic<br>Type | Coordinates (Angstroms) |           |           |
|------------------|------------------|----------------|-------------------------|-----------|-----------|
|                  |                  |                | X                       | Y         | Z         |
| 1                | 6                | 0              | -0.504888               | 3.296133  | -0.140619 |
| 2                | 6                | 0              | -1.156647               | 2.073291  | -0.143078 |
| 3                | 6                | 0              | -0.433116               | 0.859758  | -0.170793 |
| 4                | 6                | 0              | 0.998668                | 0.897297  | -0.130755 |
| 5                | 6                | 0              | 1.636816                | 2.150748  | -0.166936 |
| 6                | 6                | 0              | 0.895482                | 3.327429  | -0.171281 |
| 7                | 1                | 0              | -1.075837               | 4.218290  | -0.142630 |
| 8                | 1                | 0              | -2.238967               | 2.049674  | -0.184425 |
| 9                | 1                | 0              | 2.718327                | 2.205314  | -0.162263 |
| 10               | 1                | 0              | 1.415140                | 4.280887  | -0.183498 |
| 11               | 7                | 0              | 1.717453                | -0.299029 | -0.084401 |
| 12               | 6                | 0              | 1.567684                | -1.212558 | 1.075850  |
| 13               | 1                | 0              | 0.534393                | -1.533435 | 1.209114  |
| 14               | 1                | 0              | 1.880766                | -0.693681 | 1.995371  |
| 15               | 6                | 0              | 3.155443                | -0.300344 | -0.387439 |
| 16               | 1                | 0              | 3.337314                | 0.125155  | -1.377633 |
| 17               | 1                | 0              | 3.721559                | 0.291934  | 0.350076  |
| 18               | 6                | 0              | -1.067497               | -0.414045 | -0.404250 |
| 19               | 6                | 0              | -2.353581               | -0.825418 | -0.158091 |
| 20               | 1                | 0              | -0.420632               | -1.157041 | -0.865433 |
| 21               | 6                | 0              | -2.773924               | -2.127428 | -0.580254 |
| 22               | 7                | 0              | -3.120944               | -3.186084 | -0.919313 |
| 23               | 6                | 0              | -3.341221               | -0.061268 | 0.539418  |
| 24               | 7                | 0              | -4.163758               | 0.530435  | 1.113560  |
| 25               | 6                | 0              | 2.525400                | -2.373609 | 0.750462  |
| 26               | 6                | 0              | 3.535511                | -1.785379 | -0.274838 |
| 27               | 1                | 0              | 3.424064                | -2.277382 | -1.244633 |
| 28               | 1                | 0              | 4.574845                | -1.905438 | 0.039735  |
| 29               | 1                | 0              | 1.979619                | -3.214602 | 0.315071  |
| 30               | 1                | 0              | 3.015382                | -2.734576 | 1.657852  |

0623aba\_Ph\_NPiperidin\_CHC\_CN\_CN\_ZW\_B3lyp631pd\_PCMdms0\_TS\_CH\_vissza.log

Standard orientation:

| Center<br>Number | Atomic<br>Number | Atomic<br>Type | Coordinates (Angstroms) |           |           |
|------------------|------------------|----------------|-------------------------|-----------|-----------|
|                  |                  |                | X                       | Y         | Z         |
| 1                | 6                | 0              | -0.423199               | 3.310299  | -0.233125 |
| 2                | 6                | 0              | 0.476836                | 2.280670  | -0.485367 |
| 3                | 6                | 0              | 0.054633                | 0.944789  | -0.573202 |
| 4                | 6                | 0              | -1.319017               | 0.672678  | -0.361402 |
| 5                | 6                | 0              | -2.223491               | 1.706853  | -0.075481 |
| 6                | 6                | 0              | -1.776246               | 3.019945  | -0.018410 |
| 7                | 1                | 0              | -0.073907               | 4.337279  | -0.203979 |
| 8                | 1                | 0              | 1.530219                | 2.499121  | -0.630749 |
| 9                | 1                | 0              | -3.269199               | 1.469785  | 0.089218  |
| 10               | 1                | 0              | -2.480677               | 3.819028  | 0.188867  |
| 11               | 7                | 0              | -1.734915               | -0.669620 | -0.335207 |
| 12               | 6                | 0              | -1.015107               | -1.606967 | -1.009325 |
| 13               | 1                | 0              | -0.846050               | -1.449807 | -2.073216 |
| 14               | 6                | 0              | -2.521863               | -1.261395 | 0.778439  |
| 15               | 1                | 0              | -2.434300               | -0.638341 | 1.670042  |
| 16               | 1                | 0              | -3.575198               | -1.308074 | 0.482797  |
| 17               | 6                | 0              | 1.064576                | -0.146170 | -0.803753 |
| 18               | 6                | 0              | 2.241702                | -0.178863 | 0.042110  |
| 19               | 1                | 0              | 1.311369                | -0.287397 | -1.859729 |
| 20               | 6                | 0              | 3.443115                | -0.744810 | -0.435336 |
| 21               | 7                | 0              | 4.437805                | -1.207847 | -0.845880 |
| 22               | 6                | 0              | 2.190336                | 0.201925  | 1.400737  |
| 23               | 7                | 0              | 2.150178                | 0.518462  | 2.527733  |
| 24               | 6                | 0              | -1.327643               | -2.976058 | -0.459919 |
| 25               | 6                | 0              | -1.903981               | -2.662069 | 0.936135  |
| 26               | 1                | 0              | -1.097409               | -2.630242 | 1.673949  |
| 27               | 1                | 0              | -2.639044               | -3.398570 | 1.264202  |
| 28               | 1                | 0              | -0.451048               | -3.627542 | -0.438895 |
| 29               | 1                | 0              | -2.069643               | -3.452677 | -1.113855 |
| 30               | 1                | 0              | 0.359512                | -1.184492 | -0.687776 |

0624aaa\_Ph\_NPiperidin\_CHC\_CN\_CN\_ZW\_B3lyp631pd\_PCMdms0.log

Standard orientation:

| Center<br>Number | Atomic<br>Number | Atomic<br>Type | Coordinates (Angstroms) |           |           |
|------------------|------------------|----------------|-------------------------|-----------|-----------|
|                  |                  |                | X                       | Y         | Z         |
| 1                | 6                | 0              | -2.503365               | 2.458924  | 0.113926  |
| 2                | 6                | 0              | -2.328720               | 1.244352  | -0.549822 |
| 3                | 6                | 0              | -1.085668               | 0.598369  | -0.595999 |
| 4                | 6                | 0              | -0.021535               | 1.240390  | 0.059843  |
| 5                | 6                | 0              | -0.173527               | 2.458653  | 0.723740  |
| 6                | 6                | 0              | -1.425810               | 3.070006  | 0.755711  |
| 7                | 1                | 0              | -3.482155               | 2.928096  | 0.128385  |
| 8                | 1                | 0              | -3.174661               | 0.775523  | -1.044013 |
| 9                | 1                | 0              | 0.682381                | 2.918152  | 1.207276  |
| 10               | 1                | 0              | -1.552644               | 4.013545  | 1.275622  |
| 11               | 7                | 0              | 1.309111                | 0.661973  | 0.033065  |
| 12               | 6                | 0              | 1.849385                | -0.032021 | 0.979803  |
| 13               | 1                | 0              | 1.292602                | -0.271354 | 1.877041  |
| 14               | 6                | 0              | 2.269275                | 0.954841  | -1.078729 |
| 15               | 1                | 0              | 1.772660                | 0.782836  | -2.034139 |
| 16               | 1                | 0              | 2.533103                | 2.013947  | -1.007257 |
| 17               | 6                | 0              | -0.949134               | -0.758725 | -1.273112 |
| 18               | 6                | 0              | -1.040420               | -1.940686 | -0.308392 |
| 19               | 1                | 0              | -1.736665               | -0.838222 | -2.029687 |
| 20               | 6                | 0              | -2.287192               | -2.390565 | 0.135675  |
| 21               | 7                | 0              | -3.350254               | -2.760498 | 0.481213  |
| 22               | 6                | 0              | 0.120689                | -2.451558 | 0.259587  |
| 23               | 7                | 0              | 1.142534                | -2.834055 | 0.713163  |
| 24               | 6                | 0              | 3.274528                | -0.355679 | 0.713181  |
| 25               | 6                | 0              | 3.439436                | 0.001774  | -0.783630 |
| 26               | 1                | 0              | 3.347819                | -0.901330 | -1.390590 |
| 27               | 1                | 0              | 4.401950                | 0.465399  | -0.999244 |
| 28               | 1                | 0              | 3.487603                | -1.398004 | 0.954790  |
| 29               | 1                | 0              | 3.890289                | 0.270233  | 1.374012  |
| 30               | 1                | 0              | 0.000322                | -0.819217 | -1.814973 |

0624aba\_Ph\_NPiperidin\_CHC\_CN\_CN\_ZW\_B3lyp631pd\_PCMdmsol.log

Standard orientation:

| Center<br>Number | Atomic<br>Number | Atomic<br>Type | Coordinates (Angstroms) |           |           |
|------------------|------------------|----------------|-------------------------|-----------|-----------|
|                  |                  |                | X                       | Y         | Z         |
| 1                | 6                | 0              | -3.673478               | -0.182039 | 0.151272  |
| 2                | 6                | 0              | -2.716553               | 0.684258  | 0.680538  |
| 3                | 6                | 0              | -1.348515               | 0.379122  | 0.670271  |
| 4                | 6                | 0              | -0.992229               | -0.854454 | 0.096510  |
| 5                | 6                | 0              | -1.932276               | -1.732520 | -0.444895 |
| 6                | 6                | 0              | -3.284028               | -1.396466 | -0.413290 |
| 7                | 1                | 0              | -4.722673               | 0.094852  | 0.177808  |
| 8                | 1                | 0              | -3.030731               | 1.629657  | 1.112902  |
| 9                | 1                | 0              | -1.606079               | -2.675569 | -0.871236 |
| 10               | 1                | 0              | -4.019690               | -2.078362 | -0.825937 |
| 11               | 7                | 0              | 0.396948                | -1.256963 | 0.011143  |
| 12               | 6                | 0              | 1.152548                | -1.595961 | 0.997969  |
| 13               | 1                | 0              | 0.760716                | -1.619541 | 2.009641  |
| 14               | 6                | 0              | 1.124116                | -1.271252 | -1.298222 |
| 15               | 1                | 0              | 0.511809                | -1.797363 | -2.031131 |
| 16               | 1                | 0              | 1.231895                | -0.228036 | -1.603458 |
| 17               | 6                | 0              | -0.345187               | 1.376408  | 1.237511  |
| 18               | 6                | 0              | 0.673383                | 1.913869  | 0.236449  |
| 19               | 1                | 0              | -0.926601               | 2.191143  | 1.686856  |
| 20               | 6                | 0              | 0.251952                | 2.691253  | -0.847608 |
| 21               | 7                | 0              | -0.128449               | 3.341692  | -1.752344 |
| 22               | 6                | 0              | 2.035287                | 1.693251  | 0.434894  |
| 23               | 7                | 0              | 3.177959                | 1.469257  | 0.627569  |
| 24               | 6                | 0              | 2.546015                | -1.896380 | 0.588094  |
| 25               | 6                | 0              | 2.452321                | -1.969849 | -0.956347 |
| 26               | 1                | 0              | 2.426534                | -3.011240 | -1.283117 |
| 27               | 1                | 0              | 3.296194                | -1.478673 | -1.440289 |
| 28               | 1                | 0              | 2.918749                | -2.805463 | 1.067139  |
| 29               | 1                | 0              | 3.170129                | -1.057652 | 0.928101  |
| 30               | 1                | 0              | 0.204415                | 0.922896  | 2.069269  |

0629aaa\_Ph\_NPiperidin\_CHC\_CN\_CN\_PRODUCT\_B3lyp631pd\_PCMdmsol.log

Standard orientation:

| Center<br>Number | Atomic<br>Number | Atomic<br>Type | Coordinates (Angstroms) |           |           |
|------------------|------------------|----------------|-------------------------|-----------|-----------|
|                  |                  |                | X                       | Y         | Z         |
| 1                | 6                | 0              | -3.703223               | -0.952238 | -0.079793 |
| 2                | 6                | 0              | -2.501845               | -1.645844 | 0.065079  |
| 3                | 6                | 0              | -1.289371               | -0.978533 | 0.255582  |
| 4                | 6                | 0              | -1.276716               | 0.437481  | 0.294970  |
| 5                | 6                | 0              | -2.491758               | 1.135041  | 0.138705  |
| 6                | 6                | 0              | -3.685967               | 0.444144  | -0.045981 |
| 7                | 1                | 0              | -4.633431               | -1.492114 | -0.223395 |
| 8                | 1                | 0              | -2.497017               | -2.732308 | 0.022722  |
| 9                | 1                | 0              | -2.496559               | 2.218627  | 0.177527  |
| 10               | 1                | 0              | -4.609492               | 1.004603  | -0.159394 |
| 11               | 7                | 0              | -0.076528               | 1.113784  | 0.454942  |
| 12               | 6                | 0              | 1.142663                | 0.425654  | 0.824072  |
| 13               | 1                | 0              | 1.120559                | 0.096914  | 1.871168  |
| 14               | 6                | 0              | 0.152933                | 2.503003  | 0.045584  |
| 15               | 1                | 0              | -0.491233               | 2.761845  | -0.799999 |
| 16               | 1                | 0              | -0.069248               | 3.201148  | 0.865066  |
| 17               | 6                | 0              | -0.009097               | -1.773322 | 0.397968  |
| 18               | 6                | 0              | 1.247145                | -0.930211 | 0.008488  |
| 19               | 1                | 0              | 0.145220                | -2.093366 | 1.434766  |
| 20               | 6                | 0              | 2.473029                | -1.651960 | 0.382672  |
| 21               | 7                | 0              | 3.435626                | -2.210552 | 0.712046  |
| 22               | 6                | 0              | 1.279193                | -0.672076 | -1.442337 |
| 23               | 7                | 0              | 1.292824                | -0.463789 | -2.583843 |
| 24               | 6                | 0              | 2.263611                | 1.462544  | 0.601433  |
| 25               | 6                | 0              | 1.642279                | 2.524900  | -0.323402 |
| 26               | 1                | 0              | 1.767421                | 2.240691  | -1.371731 |
| 27               | 1                | 0              | 2.090601                | 3.511033  | -0.183739 |
| 28               | 1                | 0              | 3.171650                | 1.013621  | 0.190743  |
| 29               | 1                | 0              | 2.527935                | 1.901528  | 1.567500  |

30 1 0 -0.047121 -2.679805 -0.211484

0629baa\_Ph\_NPiperidin\_CHC\_CN\_CN\_PRODUCT\_B3lyp631pd\_PCMdmsol.log

Standard orientation:

| Center Number | Atomic Number | Atomic Type | Coordinates (Angstroms) |           |           |
|---------------|---------------|-------------|-------------------------|-----------|-----------|
|               |               |             | X                       | Y         | Z         |
| 1             | 6             | 0           | -3.703306               | 0.952178  | 0.079710  |
| 2             | 6             | 0           | -2.501934               | 1.645815  | -0.065021 |
| 3             | 6             | 0           | -1.289427               | 0.978522  | -0.255438 |
| 4             | 6             | 0           | -1.276764               | -0.437471 | -0.294876 |
| 5             | 6             | 0           | -2.491809               | -1.135070 | -0.138810 |
| 6             | 6             | 0           | -3.686046               | -0.444206 | 0.045801  |
| 7             | 1             | 0           | -4.633533               | 1.492027  | 0.223302  |
| 8             | 1             | 0           | -2.497130               | 2.732276  | -0.022626 |
| 9             | 1             | 0           | -2.496564               | -2.218654 | -0.177720 |
| 10            | 1             | 0           | -4.609592               | -1.004660 | 0.159065  |
| 11            | 7             | 0           | -0.076521               | -1.113761 | -0.454684 |
| 12            | 6             | 0           | 1.142696                | -0.425576 | -0.823924 |
| 13            | 1             | 0           | 1.120434                | -0.096897 | -1.871028 |
| 14            | 6             | 0           | 0.152929                | -2.503042 | -0.045559 |
| 15            | 1             | 0           | -0.491154               | -2.761986 | 0.800055  |
| 16            | 1             | 0           | -0.069365               | -3.201069 | -0.865117 |
| 17            | 6             | 0           | -0.009153               | 1.773347  | -0.397697 |
| 18            | 6             | 0           | 1.247176                | 0.930226  | -0.008390 |
| 19            | 6             | 0           | 2.472989                | 1.652023  | -0.382773 |
| 20            | 7             | 0           | 3.435491                | 2.210404  | -0.712783 |
| 21            | 6             | 0           | 1.279364                | 0.672192  | 1.442455  |
| 22            | 7             | 0           | 1.293191                | 0.464010  | 2.583976  |
| 23            | 6             | 0           | 2.263632                | -1.462501 | -0.601390 |
| 24            | 6             | 0           | 1.642320                | -2.525050 | 0.323274  |
| 25            | 1             | 0           | 1.767607                | -2.241101 | 1.371653  |
| 26            | 1             | 0           | 2.090589                | -3.511163 | 0.183310  |
| 27            | 1             | 0           | 3.171642                | -1.013627 | -0.190582 |
| 28            | 1             | 0           | 2.528006                | -1.901347 | -1.567505 |
| 29            | 1             | 0           | 0.145113                | 2.093571  | -1.434448 |
| 30            | 1             | 0           | -0.047174               | 2.679731  | 0.211902  |

0631aaa\_Ph\_NPiperidin\_CHC\_CN\_CN\_B3lyp631pd\_PCMdmsol.log

Standard orientation:

| Center Number | Atomic Number | Atomic Type | Coordinates (Angstroms) |           |           |
|---------------|---------------|-------------|-------------------------|-----------|-----------|
|               |               |             | X                       | Y         | Z         |
| 1             | 6             | 0           | -1.425690               | 3.234145  | -0.106855 |
| 2             | 6             | 0           | -1.795395               | 1.899097  | -0.141091 |
| 3             | 6             | 0           | -0.823911               | 0.872970  | -0.160566 |
| 4             | 6             | 0           | 0.563303                | 1.221221  | -0.087630 |
| 5             | 6             | 0           | 0.912980                | 2.582845  | -0.080410 |
| 6             | 6             | 0           | -0.066102               | 3.571007  | -0.090372 |
| 7             | 1             | 0           | -2.184035               | 4.009629  | -0.113839 |
| 8             | 1             | 0           | -2.845424               | 1.641902  | -0.210174 |
| 9             | 1             | 0           | 1.955967                | 2.870636  | -0.030344 |
| 10            | 1             | 0           | 0.232816                | 4.614686  | -0.065990 |
| 11            | 7             | 0           | 1.526219                | 0.199988  | -0.042516 |
| 12            | 6             | 0           | 1.544889                | -0.654897 | 1.169374  |
| 13            | 1             | 0           | 0.519490                | -0.845574 | 1.489667  |
| 14            | 1             | 0           | 2.045334                | -0.109504 | 1.988250  |
| 15            | 6             | 0           | 2.886969                | 0.529129  | -0.494251 |
| 16            | 1             | 0           | 2.813252                | 1.162138  | -1.382098 |
| 17            | 1             | 0           | 3.433937                | 1.097432  | 0.278149  |
| 18            | 6             | 0           | -1.158378               | -0.509348 | -0.402855 |
| 19            | 6             | 0           | -2.330860               | -1.191157 | -0.192846 |
| 20            | 1             | 0           | -0.347458               | -1.093856 | -0.831658 |
| 21            | 6             | 0           | -2.440170               | -2.555963 | -0.611912 |
| 22            | 7             | 0           | -2.534092               | -3.666868 | -0.948396 |
| 23            | 6             | 0           | -3.486273               | -0.660311 | 0.462234  |
| 24            | 7             | 0           | -4.438966               | -0.261397 | 1.000392  |
| 25            | 6             | 0           | 2.281646                | -1.968000 | 0.902215  |
| 26            | 1             | 0           | 2.310096                | -2.552987 | 1.828216  |
| 27            | 1             | 0           | 1.717041                | -2.553252 | 0.165337  |

|    |   |   |          |           |           |
|----|---|---|----------|-----------|-----------|
| 28 | 6 | 0 | 3.659657 | -0.753255 | -0.822558 |
| 29 | 1 | 0 | 3.174214 | -1.249253 | -1.672127 |
| 30 | 1 | 0 | 4.673213 | -0.483316 | -1.139086 |
| 31 | 6 | 0 | 3.700127 | -1.703559 | 0.380589  |
| 32 | 1 | 0 | 4.300945 | -1.249988 | 1.180830  |
| 33 | 1 | 0 | 4.191711 | -2.644297 | 0.110122  |

0632aba\_Ph\_NPiperidin\_CHC\_CN\_CN\_ZW\_B3lyp631pd\_PCMdms0\_TS\_CH.log

Standard orientation:

| Center Number | Atomic Number | Atomic Type | Coordinates (Angstroms) |           |           |
|---------------|---------------|-------------|-------------------------|-----------|-----------|
|               |               |             | X                       | Y         | Z         |
| 1             | 6             | 0           | -2.277884               | 2.805844  | -0.183772 |
| 2             | 6             | 0           | -2.231241               | 1.444752  | -0.470724 |
| 3             | 6             | 0           | -1.007364               | 0.766711  | -0.570243 |
| 4             | 6             | 0           | 0.178796                | 1.497982  | -0.338216 |
| 5             | 6             | 0           | 0.132479                | 2.862952  | -0.032175 |
| 6             | 6             | 0           | -1.093078               | 3.516017  | 0.038232  |
| 7             | 1             | 0           | -3.235681               | 3.313995  | -0.137305 |
| 8             | 1             | 0           | -3.150087               | 0.888761  | -0.630178 |
| 9             | 1             | 0           | 1.058417                | 3.403037  | 0.135475  |
| 10            | 1             | 0           | -1.125325               | 4.577598  | 0.261077  |
| 11            | 7             | 0           | 1.419890                | 0.793299  | -0.338995 |
| 12            | 6             | 0           | 1.470946                | -0.231519 | -1.245511 |
| 13            | 1             | 0           | 1.156578                | 0.067719  | -2.246202 |
| 14            | 6             | 0           | 2.081726                | 0.664966  | 0.985971  |
| 15            | 1             | 0           | 2.263510                | 1.676396  | 1.355688  |
| 16            | 1             | 0           | 1.381079                | 0.180071  | 1.681112  |
| 17            | 6             | 0           | -0.995021               | -0.710907 | -0.860181 |
| 18            | 6             | 0           | -1.600490               | -1.598974 | 0.102965  |
| 19            | 1             | 0           | -1.255787               | -0.954087 | -1.893105 |
| 20            | 6             | 0           | -1.540693               | -1.314119 | 1.484879  |
| 21            | 7             | 0           | -1.471005               | -1.063489 | 2.626807  |
| 22            | 6             | 0           | -2.101189               | -2.858052 | -0.295539 |
| 23            | 7             | 0           | -2.524218               | -3.894518 | -0.638376 |
| 24            | 6             | 0           | 2.589606                | -1.244502 | -1.197291 |
| 25            | 1             | 0           | 2.246979                | -2.170844 | -1.668649 |
| 26            | 1             | 0           | 3.390286                | -0.855044 | -1.842433 |
| 27            | 6             | 0           | 3.378262                | -0.133517 | 0.898661  |
| 28            | 1             | 0           | 4.129185                | 0.437035  | 0.338894  |
| 29            | 1             | 0           | 3.763795                | -0.269645 | 1.913511  |
| 30            | 6             | 0           | 3.128725                | -1.481488 | 0.215918  |
| 31            | 1             | 0           | 2.407393                | -2.064878 | 0.801162  |
| 32            | 1             | 0           | 4.049511                | -2.069295 | 0.162704  |
| 33            | 1             | 0           | 0.265984                | -0.924737 | -0.975637 |

0634aaa\_Ph\_NPiperidin\_CHC\_CN\_CN\_ZW\_B3lyp631pd\_PCMdms0.log

Standard orientation:

| Center Number | Atomic Number | Atomic Type | Coordinates (Angstroms) |           |           |
|---------------|---------------|-------------|-------------------------|-----------|-----------|
|               |               |             | X                       | Y         | Z         |
| 1             | 6             | 0           | -2.432278               | 2.685278  | 0.209783  |
| 2             | 6             | 0           | -2.375657               | 1.468053  | -0.467480 |
| 3             | 6             | 0           | -1.193448               | 0.716700  | -0.544180 |
| 4             | 6             | 0           | -0.067333               | 1.259756  | 0.094592  |
| 5             | 6             | 0           | -0.100769               | 2.478120  | 0.775247  |
| 6             | 6             | 0           | -1.294116               | 3.194542  | 0.837482  |
| 7             | 1             | 0           | -3.365996               | 3.237746  | 0.245941  |
| 8             | 1             | 0           | -3.268261               | 1.078266  | -0.948073 |
| 9             | 1             | 0           | 0.801310                | 2.855670  | 1.245870  |
| 10            | 1             | 0           | -1.329601               | 4.140153  | 1.367757  |
| 11            | 7             | 0           | 1.220045                | 0.573577  | 0.032485  |
| 12            | 6             | 0           | 1.614746                | -0.184026 | 1.002881  |
| 13            | 1             | 0           | 0.909204                | -0.338348 | 1.812616  |
| 14            | 6             | 0           | 2.072924                | 0.877241  | -1.157718 |
| 15            | 1             | 0           | 1.402539                | 0.896035  | -2.018511 |
| 16            | 1             | 0           | 2.451665                | 1.893563  | -1.009782 |
| 17            | 6             | 0           | -1.196918               | -0.640474 | -1.236020 |
| 18            | 6             | 0           | -1.567445               | -1.801124 | -0.313239 |
| 19            | 1             | 0           | -1.911430               | -0.594425 | -2.064284 |

|    |   |   |           |           |           |
|----|---|---|-----------|-----------|-----------|
| 20 | 6 | 0 | -2.909220 | -2.106239 | -0.071874 |
| 21 | 7 | 0 | -4.047422 | -2.353742 | 0.103584  |
| 22 | 6 | 0 | -0.572246 | -2.454035 | 0.408655  |
| 23 | 7 | 0 | 0.309347  | -2.975127 | 0.996559  |
| 24 | 6 | 0 | 2.942507  | -0.844034 | 1.064431  |
| 25 | 1 | 0 | 3.323282  | -0.712302 | 2.084134  |
| 26 | 1 | 0 | 2.725554  | -1.918203 | 0.974055  |
| 27 | 6 | 0 | 3.199998  | -0.135139 | -1.327319 |
| 28 | 1 | 0 | 2.789711  | -1.082563 | -1.694752 |
| 29 | 1 | 0 | 3.880421  | 0.242576  | -2.095232 |
| 30 | 6 | 0 | 3.931076  | -0.357469 | -0.000305 |
| 31 | 1 | 0 | 4.395094  | 0.578892  | 0.328549  |
| 32 | 1 | 0 | 4.732693  | -1.090210 | -0.118065 |
| 33 | 1 | 0 | -0.220902 | -0.842695 | -1.688233 |

0634aba\_Ph\_NPiperidin\_CHC\_CN\_CN\_ZW\_B3lyp631pd\_PCMDmso.log

Standard orientation:

| Center Number | Atomic Number | Atomic Type | Coordinates (Angstroms) |           |           |
|---------------|---------------|-------------|-------------------------|-----------|-----------|
|               |               |             | X                       | Y         | Z         |
| 1             | 6             | 0           | 3.735242                | 0.880336  | 0.155269  |
| 2             | 6             | 0           | 2.982881                | -0.166171 | 0.689368  |
| 3             | 6             | 0           | 1.581279                | -0.156744 | 0.675547  |
| 4             | 6             | 0           | 0.971916                | 0.967233  | 0.092064  |
| 5             | 6             | 0           | 1.704710                | 2.024704  | -0.446802 |
| 6             | 6             | 0           | 3.097529                | 1.982343  | -0.413651 |
| 7             | 1             | 0           | 4.819253                | 0.832705  | 0.183517  |
| 8             | 1             | 0           | 3.488716                | -1.020701 | 1.129018  |
| 9             | 1             | 0           | 1.187438                | 2.877706  | -0.874447 |
| 10            | 1             | 0           | 3.672401                | 2.804178  | -0.826757 |
| 11            | 7             | 0           | -0.482072               | 1.064848  | 0.018917  |
| 12            | 6             | 0           | -1.174022               | 1.331009  | 1.076142  |
| 13            | 1             | 0           | -0.609180               | 1.495807  | 1.990573  |
| 14            | 6             | 0           | -1.105785               | 0.873247  | -1.328391 |
| 15            | 1             | 0           | -0.437485               | 1.358616  | -2.041151 |
| 16            | 1             | 0           | -1.078980               | -0.203503 | -1.513750 |
| 17            | 6             | 0           | 0.807088                | -1.334315 | 1.252600  |
| 18            | 6             | 0           | -0.025077               | -2.112659 | 0.238102  |
| 19            | 1             | 0           | 1.537859                | -1.981388 | 1.754719  |
| 20            | 6             | 0           | 0.597094                | -2.741946 | -0.845825 |
| 21            | 7             | 0           | 1.144091                | -3.257498 | -1.752072 |
| 22            | 6             | 0           | -1.392845               | -2.291846 | 0.437964  |
| 23            | 7             | 0           | -2.552271               | -2.411867 | 0.621977  |
| 24            | 6             | 0           | -2.653845               | 1.436364  | 1.111806  |
| 25            | 1             | 0           | -2.995205               | 0.869869  | 1.986765  |
| 26            | 1             | 0           | -2.870017               | 2.488365  | 1.354037  |
| 27            | 6             | 0           | -2.517728               | 1.444820  | -1.389197 |
| 28            | 1             | 0           | -2.468698               | 2.539248  | -1.423977 |
| 29            | 1             | 0           | -2.973656               | 1.111566  | -2.325479 |
| 30            | 6             | 0           | -3.341492               | 0.988456  | -0.181644 |
| 31            | 1             | 0           | -3.425142               | -0.103390 | -0.178484 |
| 32            | 1             | 0           | -4.351597               | 1.402958  | -0.221578 |
| 33            | 1             | 0           | 0.134391                | -0.989389 | 2.045120  |

0639baa\_Ph\_NPiperidin\_CHC\_CN\_CN\_PRODUCT\_B3lyp631pd\_PCMDmso.log

Standard orientation:

| Center Number | Atomic Number | Atomic Type | Coordinates (Angstroms) |           |           |
|---------------|---------------|-------------|-------------------------|-----------|-----------|
|               |               |             | X                       | Y         | Z         |
| 1             | 6             | 0           | 3.996602                | -0.523807 | 0.024040  |
| 2             | 6             | 0           | 2.901201                | -1.380241 | 0.005620  |
| 3             | 6             | 0           | 1.593537                | -0.894895 | -0.139715 |
| 4             | 6             | 0           | 1.383945                | 0.492615  | -0.276948 |
| 5             | 6             | 0           | 2.499290                | 1.352681  | -0.259566 |
| 6             | 6             | 0           | 3.786768                | 0.852876  | -0.108432 |
| 7             | 1             | 0           | 4.999705                | -0.921527 | 0.139883  |
| 8             | 1             | 0           | 3.050896                | -2.451484 | 0.114825  |
| 9             | 1             | 0           | 2.350419                | 2.419290  | -0.388466 |
| 10            | 1             | 0           | 4.629140                | 1.538119  | -0.105041 |
| 11            | 7             | 0           | 0.080879                | 1.030225  | -0.438110 |

|    |   |   |           |           |           |
|----|---|---|-----------|-----------|-----------|
| 12 | 6 | 0 | -0.930956 | 0.087013  | -0.877761 |
| 13 | 1 | 0 | -0.596142 | -0.323996 | -1.837175 |
| 14 | 6 | 0 | -0.301563 | 2.094452  | 0.523191  |
| 15 | 1 | 0 | -0.378311 | 1.689022  | 1.542013  |
| 16 | 1 | 0 | 0.503067  | 2.830745  | 0.536079  |
| 17 | 6 | 0 | 0.455106  | -1.892534 | -0.159769 |
| 18 | 6 | 0 | -0.939320 | -1.224148 | 0.051558  |
| 19 | 6 | 0 | -1.990163 | -2.160472 | -0.376136 |
| 20 | 7 | 0 | -2.807890 | -2.895658 | -0.748923 |
| 21 | 6 | 0 | -1.160077 | -0.922012 | 1.477119  |
| 22 | 7 | 0 | -1.319282 | -0.718817 | 2.609014  |
| 23 | 6 | 0 | -2.300073 | 0.743102  | -1.119505 |
| 24 | 6 | 0 | -1.613080 | 2.776425  | 0.143279  |
| 25 | 1 | 0 | -1.867567 | 3.498862  | 0.925844  |
| 26 | 1 | 0 | -1.478187 | 3.338258  | -0.789570 |
| 27 | 1 | 0 | -3.051744 | -0.038635 | -1.262018 |
| 28 | 1 | 0 | -2.224513 | 1.277303  | -2.073679 |
| 29 | 1 | 0 | 0.412776  | -2.397783 | -1.131184 |
| 30 | 1 | 0 | 0.610805  | -2.671413 | 0.591491  |
| 31 | 6 | 0 | -2.723842 | 1.740930  | -0.038825 |
| 32 | 1 | 0 | -2.919354 | 1.229447  | 0.911438  |
| 33 | 1 | 0 | -3.661193 | 2.221632  | -0.337190 |

0641aaa\_Ph\_NMorf\_CHC\_CN\_CN\_B3lyp631pd\_PCmDmso.log

Standard orientation:

| Center Number | Atomic Number | Atomic Type | Coordinates (Angstroms) |           |           |
|---------------|---------------|-------------|-------------------------|-----------|-----------|
|               |               |             | X                       | Y         | Z         |
| 1             | 6             | 0           | -1.356793               | 3.249818  | -0.110564 |
| 2             | 6             | 0           | -1.755943               | 1.922765  | -0.148464 |
| 3             | 6             | 0           | -0.807355               | 0.876316  | -0.172396 |
| 4             | 6             | 0           | 0.585052                | 1.196304  | -0.102231 |
| 5             | 6             | 0           | 0.966347                | 2.547536  | -0.089738 |
| 6             | 6             | 0           | 0.008870                | 3.557709  | -0.095219 |
| 7             | 1             | 0           | -2.098503               | 4.041217  | -0.114193 |
| 8             | 1             | 0           | -2.811353               | 1.688843  | -0.217292 |
| 9             | 1             | 0           | 2.015697                | 2.811907  | -0.042991 |
| 10            | 1             | 0           | 0.330557                | 4.594435  | -0.069365 |
| 11            | 7             | 0           | 1.527561                | 0.151507  | -0.063957 |
| 12            | 6             | 0           | 1.550243                | -0.695291 | 1.149582  |
| 13            | 1             | 0           | 0.532551                | -0.952592 | 1.448174  |
| 14            | 1             | 0           | 2.019083                | -0.145043 | 1.981343  |
| 15            | 6             | 0           | 2.896985                | 0.452413  | -0.500783 |
| 16            | 1             | 0           | 2.861697                | 1.028556  | -1.429216 |
| 17            | 1             | 0           | 3.444703                | 1.040586  | 0.253366  |
| 18            | 6             | 0           | -1.173646               | -0.499413 | -0.414637 |
| 19            | 6             | 0           | -2.356942               | -1.154965 | -0.188675 |
| 20            | 1             | 0           | -0.382424               | -1.100167 | -0.857147 |
| 21            | 6             | 0           | -2.502925               | -2.516698 | -0.607665 |
| 22            | 7             | 0           | -2.627047               | -3.624485 | -0.944090 |
| 23            | 6             | 0           | -3.490674               | -0.599014 | 0.484067  |
| 24            | 7             | 0           | -4.426070               | -0.180371 | 1.037034  |
| 25            | 6             | 0           | 2.346065                | -1.966519 | 0.873160  |
| 26            | 1             | 0           | 2.442980                | -2.555537 | 1.788898  |
| 27            | 1             | 0           | 1.827123                | -2.574649 | 0.115721  |
| 28            | 6             | 0           | 3.641700                | -0.859724 | -0.739774 |
| 29            | 1             | 0           | 3.163652                | -1.409426 | -1.565174 |
| 30            | 1             | 0           | 4.682096                | -0.657820 | -1.007236 |
| 31            | 8             | 0           | 3.668141                | -1.663036 | 0.436527  |

0643abb\_Ph\_NMorf\_CHC\_CN\_CN\_ZW\_B3lyp631pd\_PCmDmso\_TS\_CH.log

Standard orientation:

| Center Number | Atomic Number | Atomic Type | Coordinates (Angstroms) |          |           |
|---------------|---------------|-------------|-------------------------|----------|-----------|
|               |               |             | X                       | Y        | Z         |
| 1             | 6             | 0           | -1.998571               | 2.999368 | -0.192997 |
| 2             | 6             | 0           | -2.079719               | 1.642050 | -0.490666 |
| 3             | 6             | 0           | -0.925954               | 0.849803 | -0.578898 |
| 4             | 6             | 0           | 0.318282                | 1.465825 | -0.326017 |
| 5             | 6             | 0           | 0.403456                | 2.824897 | -0.006041 |

|    |   |   |           |           |           |
|----|---|---|-----------|-----------|-----------|
| 6  | 6 | 0 | -0.754998 | 3.591590  | 0.053432  |
| 7  | 1 | 0 | -2.903559 | 3.597066  | -0.155251 |
| 8  | 1 | 0 | -3.045647 | 1.177973  | -0.664804 |
| 9  | 1 | 0 | 1.375084  | 3.270009  | 0.180693  |
| 10 | 1 | 0 | -0.689400 | 4.649225  | 0.286863  |
| 11 | 7 | 0 | 1.485667  | 0.642862  | -0.320650 |
| 12 | 6 | 0 | 1.472413  | -0.366075 | -1.231844 |
| 13 | 1 | 0 | 1.213751  | -0.064321 | -2.246493 |
| 14 | 6 | 0 | 2.132508  | 0.422991  | 0.995086  |
| 15 | 1 | 0 | 2.456934  | 1.391374  | 1.382851  |
| 16 | 1 | 0 | 1.395240  | 0.001510  | 1.690476  |
| 17 | 6 | 0 | -1.046749 | -0.624683 | -0.870478 |
| 18 | 6 | 0 | -1.738232 | -1.445516 | 0.103307  |
| 19 | 1 | 0 | -1.355373 | -0.833404 | -1.898082 |
| 20 | 6 | 0 | -2.379789 | -2.639763 | -0.288621 |
| 21 | 7 | 0 | -2.920876 | -3.621994 | -0.626246 |
| 22 | 6 | 0 | -1.624287 | -1.170498 | 1.482640  |
| 23 | 7 | 0 | -1.505501 | -0.925587 | 2.622188  |
| 24 | 6 | 0 | 2.498468  | -1.470259 | -1.123742 |
| 25 | 1 | 0 | 2.096574  | -2.396850 | -1.540728 |
| 26 | 1 | 0 | 3.362688  | -1.175087 | -1.744593 |
| 27 | 6 | 0 | 3.314994  | -0.522169 | 0.844429  |
| 28 | 1 | 0 | 4.123550  | -0.048693 | 0.269529  |
| 29 | 1 | 0 | 3.697880  | -0.795802 | 1.829094  |
| 30 | 8 | 0 | 2.893874  | -1.727691 | 0.206290  |
| 31 | 1 | 0 | 0.155324  | -0.963816 | -0.984456 |

0644aaa\_Ph\_NMorf\_CHC\_CN\_CN\_BZW\_3lyp631pd\_PCmDmso.log

Standard orientation:

| Center<br>Number | Atomic<br>Number | Atomic<br>Type | Coordinates (Angstroms) |           |           |
|------------------|------------------|----------------|-------------------------|-----------|-----------|
|                  |                  |                | X                       | Y         | Z         |
| 1                | 6                | 0              | -2.519496               | 2.622585  | 0.183646  |
| 2                | 6                | 0              | -2.428004               | 1.406533  | -0.492409 |
| 3                | 6                | 0              | -1.227314               | 0.685026  | -0.562526 |
| 4                | 6                | 0              | -0.119877               | 1.258458  | 0.083138  |
| 5                | 6                | 0              | -0.186854               | 2.475976  | 0.762320  |
| 6                | 6                | 0              | -1.398709               | 3.161506  | 0.816971  |
| 7                | 1                | 0              | -3.467511               | 3.150359  | 0.214492  |
| 8                | 1                | 0              | -3.307801               | 0.994022  | -0.977471 |
| 9                | 1                | 0              | 0.702554                | 2.877421  | 1.237030  |
| 10               | 1                | 0              | -1.461211               | 4.106122  | 1.346344  |
| 11               | 7                | 0              | 1.186747                | 0.607538  | 0.032245  |
| 12               | 6                | 0              | 1.614996                | -0.130431 | 1.000409  |
| 13               | 1                | 0              | 0.942558                | -0.334062 | 1.826160  |
| 14               | 6                | 0              | 2.054274                | 0.909508  | -1.142678 |
| 15               | 1                | 0              | 1.419454                | 0.892856  | -2.029913 |
| 16               | 1                | 0              | 2.436330                | 1.924572  | -1.006941 |
| 17               | 6                | 0              | -1.194081               | -0.673108 | -1.251846 |
| 18               | 6                | 0              | -1.472118               | -1.846508 | -0.313092 |
| 19               | 1                | 0              | -1.941714               | -0.661964 | -2.051386 |
| 20               | 6                | 0              | -2.787358               | -2.204082 | -0.004294 |
| 21               | 7                | 0              | -3.904294               | -2.496238 | 0.227437  |
| 22               | 6                | 0              | -0.416005               | -2.451065 | 0.360114  |
| 23               | 7                | 0              | 0.521356                | -2.920522 | 0.904553  |
| 24               | 6                | 0              | 2.988165                | -0.710997 | 1.023473  |
| 25               | 1                | 0              | 3.434336                | -0.487707 | 1.999083  |
| 26               | 1                | 0              | 2.857627                | -1.804121 | 0.964802  |
| 27               | 6                | 0              | 3.180052                | -0.111148 | -1.233504 |
| 28               | 1                | 0              | 2.792508                | -1.091423 | -1.542686 |
| 29               | 1                | 0              | 3.918622                | 0.219763  | -1.964652 |
| 30               | 8                | 0              | 3.843802                | -0.205413 | 0.025063  |
| 31               | 1                | 0              | -0.228862               | -0.831502 | -1.743349 |

0644aba\_Ph\_NMorf\_CHC\_CN\_CN\_BZW\_3lyp631pd\_PCmDmso.log

Standard orientation:

| Center<br>Number | Atomic<br>Number | Atomic<br>Type | Coordinates (Angstroms) |          |           |
|------------------|------------------|----------------|-------------------------|----------|-----------|
|                  |                  |                | X                       | Y        | Z         |
| 1                | 6                | 0              | 2.420496                | 2.649704 | -0.140369 |



|    |   |   |           |           |           |
|----|---|---|-----------|-----------|-----------|
| 2  | 6 | 0 | 2.361479  | 1.417699  | 0.505186  |
| 3  | 6 | 0 | 1.168865  | 0.680619  | 0.600166  |
| 4  | 6 | 0 | 0.033029  | 1.269520  | 0.020734  |
| 5  | 6 | 0 | 0.070322  | 2.501860  | -0.637718 |
| 6  | 6 | 0 | 1.272292  | 3.197396  | -0.718294 |
| 7  | 1 | 0 | 3.362696  | 3.186289  | -0.190268 |
| 8  | 1 | 0 | 3.260931  | 0.999310  | 0.946646  |
| 9  | 1 | 0 | -0.838655 | 2.917250  | -1.060797 |
| 10 | 1 | 0 | 1.307177  | 4.159724  | -1.217290 |
| 11 | 7 | 0 | -1.262607 | 0.600694  | 0.080488  |
| 12 | 6 | 0 | -1.930705 | 0.539317  | 1.180678  |
| 13 | 1 | 0 | -1.518673 | 1.034487  | 2.055613  |
| 14 | 6 | 0 | -1.805007 | 0.000471  | -1.173826 |
| 15 | 1 | 0 | -1.539008 | 0.671808  | -1.991831 |
| 16 | 1 | 0 | -1.300704 | -0.960759 | -1.316102 |
| 17 | 6 | 0 | 1.200963  | -0.702964 | 1.238840  |
| 18 | 6 | 0 | 1.606740  | -1.807398 | 0.263282  |
| 19 | 1 | 0 | 1.909457  | -0.667134 | 2.073366  |
| 20 | 6 | 0 | 2.952087  | -1.987602 | -0.067739 |
| 21 | 7 | 0 | 4.094682  | -2.126994 | -0.318205 |
| 22 | 6 | 0 | 0.630185  | -2.536760 | -0.410429 |
| 23 | 7 | 0 | -0.229307 | -3.131717 | -0.958801 |
| 24 | 6 | 0 | -3.245126 | -0.152365 | 1.293500  |
| 25 | 1 | 0 | -3.193332 | -0.846347 | 2.140738  |
| 26 | 1 | 0 | -3.983977 | 0.622493  | 1.566979  |
| 27 | 6 | 0 | -3.312062 | -0.166073 | -1.049154 |
| 28 | 1 | 0 | -3.815997 | 0.809940  | -1.060087 |
| 29 | 1 | 0 | -3.686153 | -0.764143 | -1.880722 |
| 30 | 8 | 0 | -3.619809 | -0.877244 | 0.150260  |
| 31 | 1 | 0 | 0.233989  | -0.959400 | 1.678151  |

0649aba\_Ph\_NMorf\_CHC\_CN\_CN\_PR\_3lyp631pd\_PCMdmsol.log

Standard orientation:

| Center Number | Atomic Number | Atomic Type | Coordinates (Angstroms) |           |           |
|---------------|---------------|-------------|-------------------------|-----------|-----------|
|               |               |             | X                       | Y         | Z         |
| 1             | 6             | 0           | 3.976713                | -0.587317 | 0.051756  |
| 2             | 6             | 0           | 2.865464                | -1.423600 | 0.032106  |
| 3             | 6             | 0           | 1.569773                | -0.914977 | -0.136530 |
| 4             | 6             | 0           | 1.393114                | 0.473480  | -0.297962 |
| 5             | 6             | 0           | 2.521167                | 1.314101  | -0.276266 |
| 6             | 6             | 0           | 3.796827                | 0.791237  | -0.101260 |
| 7             | 1             | 0           | 4.970206                | -1.002858 | 0.186066  |
| 8             | 1             | 0           | 2.993242                | -2.495541 | 0.159418  |
| 9             | 1             | 0           | 2.391921                | 2.381710  | -0.418260 |
| 10            | 1             | 0           | 4.652587                | 1.459471  | -0.094288 |
| 11            | 7             | 0           | 0.102037                | 1.037714  | -0.477615 |
| 12            | 6             | 0           | -0.936066               | 0.111547  | -0.889134 |
| 13            | 1             | 0           | -0.661403               | -0.296037 | -1.869411 |
| 14            | 6             | 0           | -0.270770               | 2.096883  | 0.488976  |
| 15            | 1             | 0           | -0.272371               | 1.711616  | 1.516516  |
| 16            | 1             | 0           | 0.473849                | 2.893978  | 0.436736  |
| 17            | 6             | 0           | 0.408747                | -1.886164 | -0.155167 |
| 18            | 6             | 0           | -0.970673               | -1.183585 | 0.044979  |
| 19            | 6             | 0           | -2.043638               | -2.097533 | -0.379376 |
| 20            | 7             | 0           | -2.881146               | -2.810051 | -0.751666 |
| 21            | 6             | 0           | -1.193753               | -0.856844 | 1.465621  |
| 22            | 7             | 0           | -1.347742               | -0.648087 | 2.596823  |
| 23            | 6             | 0           | -2.282237               | 0.823093  | -1.063668 |
| 24            | 6             | 0           | -1.635694               | 2.682316  | 0.161648  |
| 25            | 1             | 0           | -1.962348               | 3.339958  | 0.970150  |
| 26            | 1             | 0           | -1.594427               | 3.262406  | -0.772365 |
| 27            | 1             | 0           | -3.087039               | 0.094099  | -1.179803 |
| 28            | 1             | 0           | -2.227666               | 1.423948  | -1.983583 |
| 29            | 1             | 0           | 0.359395                | -2.397577 | -1.123003 |
| 30            | 1             | 0           | 0.541681                | -2.662065 | 0.603304  |
| 31            | 8             | 0           | -2.610439               | 1.646755  | 0.040175  |

0651aaa\_Ph\_NMeEt\_CHC\_CN\_CN\_B3lyp631pd\_PCMdmsol.log

Standard orientation:

| Center Number | Atomic Number | Atomic Type | Coordinates (Angstroms) |           |           |
|---------------|---------------|-------------|-------------------------|-----------|-----------|
|               |               |             | X                       | Y         | Z         |
| 1             | 6             | 0           | -1.079277               | -3.034042 | -0.089187 |
| 2             | 6             | 0           | 0.004440                | -2.172416 | -0.113155 |
| 3             | 6             | 0           | -0.175199               | -0.770809 | -0.167163 |
| 4             | 6             | 0           | -1.503284               | -0.232421 | -0.131833 |
| 5             | 6             | 0           | -2.587037               | -1.130836 | -0.142720 |
| 6             | 6             | 0           | -2.376504               | -2.504626 | -0.120557 |
| 7             | 1             | 0           | -0.923103               | -4.107172 | -0.070491 |
| 8             | 1             | 0           | 1.006547                | -2.582137 | -0.149924 |
| 9             | 1             | 0           | -3.601532               | -0.752663 | -0.128869 |
| 10            | 1             | 0           | -3.233687               | -3.171183 | -0.107952 |
| 11            | 7             | 0           | -1.689930               | 1.156442  | -0.108972 |
| 12            | 6             | 0           | -1.137356               | 1.911308  | 1.042966  |
| 13            | 1             | 0           | -0.339205               | 1.316239  | 1.489675  |
| 14            | 1             | 0           | -1.923572               | 2.007120  | 1.808518  |
| 15            | 6             | 0           | -2.995722               | 1.658413  | -0.535277 |
| 16            | 1             | 0           | -2.915640               | 2.727133  | -0.741684 |
| 17            | 1             | 0           | -3.306177               | 1.161422  | -1.455947 |
| 18            | 1             | 0           | -3.776710               | 1.519723  | 0.228021  |
| 19            | 6             | 0           | 0.916579                | 0.135944  | -0.418686 |
| 20            | 6             | 0           | 2.263081                | -0.001718 | -0.186131 |
| 21            | 1             | 0           | 0.620673                | 1.071881  | -0.885970 |
| 22            | 6             | 0           | 3.163828                | 1.019197  | -0.628753 |
| 23            | 7             | 0           | 3.900084                | 1.848634  | -0.984277 |
| 24            | 6             | 0           | 2.870115                | -1.089455 | 0.516001  |
| 25            | 7             | 0           | 3.393539                | -1.955530 | 1.092679  |
| 26            | 6             | 0           | -0.604089               | 3.295472  | 0.678706  |
| 27            | 1             | 0           | -1.383146               | 3.943463  | 0.267715  |
| 28            | 1             | 0           | -0.214839               | 3.781749  | 1.578518  |
| 29            | 1             | 0           | 0.207093                | 3.233542  | -0.052874 |

0653aaa\_Ph\_NMeEt\_CHC\_CN\_CN\_ZW\_B3lyp631pd\_PCMdms0\_TS\_CH.log

Standard orientation:

| Center Number | Atomic Number | Atomic Type | Coordinates (Angstroms) |           |           |
|---------------|---------------|-------------|-------------------------|-----------|-----------|
|               |               |             | X                       | Y         | Z         |
| 1             | 6             | 0           | -1.524950               | -2.795772 | -0.438479 |
| 2             | 6             | 0           | -0.374524               | -2.033048 | -0.648960 |
| 3             | 6             | 0           | -0.361843               | -0.657326 | -0.399345 |
| 4             | 6             | 0           | -1.554932               | -0.054670 | 0.054361  |
| 5             | 6             | 0           | -2.705310               | -0.813380 | 0.269870  |
| 6             | 6             | 0           | -2.691495               | -2.185881 | 0.022158  |
| 7             | 1             | 0           | -1.502728               | -3.864701 | -0.624488 |
| 8             | 1             | 0           | 0.534265                | -2.506221 | -1.007574 |
| 9             | 1             | 0           | -3.602830               | -0.327238 | 0.638097  |
| 10            | 1             | 0           | -3.586890               | -2.773330 | 0.196976  |
| 11            | 7             | 0           | -1.581052               | 1.371200  | 0.241099  |
| 12            | 6             | 0           | -0.399768               | 1.885610  | 0.694319  |
| 13            | 1             | 0           | -0.005554               | 1.354723  | 1.563555  |
| 14            | 6             | 0           | -2.418669               | 2.139527  | -0.693375 |
| 15            | 1             | 0           | -2.594705               | 3.138264  | -0.293770 |
| 16            | 1             | 0           | -1.956833               | 2.217847  | -1.685519 |
| 17            | 1             | 0           | -3.377604               | 1.632668  | -0.794356 |
| 18            | 6             | 0           | 0.887783                | 0.150975  | -0.673986 |
| 19            | 6             | 0           | 2.151148                | -0.299524 | -0.131388 |
| 20            | 1             | 0           | 0.973877                | 0.470908  | -1.717323 |
| 21            | 6             | 0           | 3.362145                | 0.139037  | -0.710200 |
| 22            | 7             | 0           | 4.361702                | 0.496529  | -1.204778 |
| 23            | 6             | 0           | 2.233224                | -1.038356 | 1.069792  |
| 24            | 7             | 0           | 2.311302                | -1.660520 | 2.059088  |
| 25            | 6             | 0           | -0.104449               | 3.354657  | 0.634374  |
| 26            | 1             | 0           | -0.258289               | 3.773394  | -0.361900 |
| 27            | 1             | 0           | -0.754652               | 3.889758  | 1.338122  |
| 28            | 1             | 0           | 0.929027                | 3.530655  | 0.938233  |
| 29            | 1             | 0           | 0.569096                | 1.261718  | -0.152752 |

0654aaa\_Ph\_NMeEt\_CHC\_CN\_CN\_ZW\_B3lyp631pd\_PCMdms0.log

Standard orientation:

| Center<br>Number | Atomic<br>Number | Atomic<br>Type | Coordinates (Angstroms) |           |           |
|------------------|------------------|----------------|-------------------------|-----------|-----------|
|                  |                  |                | X                       | Y         | Z         |
| 1                | 6                | 0              | 0.451320                | -3.214691 | 0.433482  |
| 2                | 6                | 0              | 1.038985                | -2.163264 | -0.266924 |
| 3                | 6                | 0              | 0.352636                | -0.965319 | -0.519188 |
| 4                | 6                | 0              | -0.960078               | -0.886215 | -0.030422 |
| 5                | 6                | 0              | -1.570558               | -1.927712 | 0.670640  |
| 6                | 6                | 0              | -0.856840               | -3.099668 | 0.909057  |
| 7                | 1                | 0              | 1.014170                | -4.126497 | 0.607110  |
| 8                | 1                | 0              | 2.058801                | -2.260357 | -0.627616 |
| 9                | 1                | 0              | -2.591210               | -1.815696 | 1.021953  |
| 10               | 1                | 0              | -1.320681               | -3.912644 | 1.457243  |
| 11               | 7                | 0              | -1.769856               | 0.307652  | -0.285459 |
| 12               | 6                | 0              | -1.819198               | 1.248439  | 0.601633  |
| 13               | 1                | 0              | -1.198234               | 1.088293  | 1.477416  |
| 14               | 6                | 0              | -2.536103               | 0.281092  | -1.548887 |
| 15               | 1                | 0              | -3.004287               | 1.241329  | -1.742903 |
| 16               | 1                | 0              | -1.849833               | 0.032593  | -2.358404 |
| 17               | 1                | 0              | -3.295010               | -0.499733 | -1.471406 |
| 18               | 6                | 0              | 1.057530                | 0.180087  | -1.234825 |
| 19               | 6                | 0              | 1.890927                | 1.063296  | -0.306671 |
| 20               | 1                | 0              | 1.709603                | -0.249975 | -2.001698 |
| 21               | 6                | 0              | 3.214531                | 0.726865  | -0.013385 |
| 22               | 7                | 0              | 4.333429                | 0.430867  | 0.206078  |
| 23               | 6                | 0              | 1.278682                | 2.113524  | 0.371905  |
| 24               | 7                | 0              | 0.708081                | 2.990924  | 0.918582  |
| 25               | 6                | 0              | -2.607669               | 2.496535  | 0.558693  |
| 26               | 1                | 0              | -3.217999               | 2.632591  | -0.330669 |
| 27               | 1                | 0              | -3.247306               | 2.520591  | 1.448842  |
| 28               | 1                | 0              | -1.895886               | 3.323014  | 0.661901  |
| 29               | 1                | 0              | 0.331295                | 0.802563  | -1.766837 |

0659aba\_Ph\_NMeEt\_CHC\_CN\_CN\_PR\_B3lyp631pd\_PCMdms0.log

Standard orientation:

| Center<br>Number | Atomic<br>Number | Atomic<br>Type | Coordinates (Angstroms) |           |           |
|------------------|------------------|----------------|-------------------------|-----------|-----------|
|                  |                  |                | X                       | Y         | Z         |
| 1                | 6                | 0              | 3.489048                | -1.268030 | -0.073758 |
| 2                | 6                | 0              | 2.197415                | -1.781974 | -0.173700 |
| 3                | 6                | 0              | 1.076020                | -0.949749 | -0.207461 |
| 4                | 6                | 0              | 1.238987                | 0.454274  | -0.122608 |
| 5                | 6                | 0              | 2.550900                | 0.965677  | -0.028515 |
| 6                | 6                | 0              | 3.653746                | 0.115117  | -0.002816 |
| 7                | 1                | 0              | 4.345713                | -1.933608 | -0.051526 |
| 8                | 1                | 0              | 2.046211                | -2.857314 | -0.228236 |
| 9                | 1                | 0              | 2.718312                | 2.033608  | 0.015785  |
| 10               | 1                | 0              | 4.648477                | 0.545383  | 0.068832  |
| 11               | 7                | 0              | 0.117436                | 1.297877  | -0.089200 |
| 12               | 6                | 0              | -1.119912               | 0.796981  | -0.686244 |
| 13               | 1                | 0              | -0.969250               | 0.544026  | -1.747122 |
| 14               | 6                | 0              | 0.343208                | 2.734607  | 0.023782  |
| 15               | 1                | 0              | 1.009097                | 2.932299  | 0.867108  |
| 16               | 1                | 0              | 0.790360                | 3.172044  | -0.881084 |
| 17               | 6                | 0              | -0.289621               | -1.580531 | -0.350777 |
| 18               | 6                | 0              | -1.433940               | -0.590788 | 0.012883  |
| 19               | 6                | 0              | -2.711541               | -1.151176 | -0.463249 |
| 20               | 7                | 0              | -3.700956               | -1.605432 | -0.864750 |
| 21               | 6                | 0              | -1.529452               | -0.399856 | 1.474196  |
| 22               | 7                | 0              | -1.607110               | -0.256156 | 2.622755  |
| 23               | 6                | 0              | -2.299580               | 1.761597  | -0.586661 |
| 24               | 1                | 0              | -3.191834               | 1.283369  | -0.996349 |
| 25               | 1                | 0              | -2.119786               | 2.663114  | -1.174600 |
| 26               | 1                | 0              | -0.462576               | -1.890324 | -1.387424 |
| 27               | 1                | 0              | -0.373421               | -2.480696 | 0.264340  |
| 28               | 1                | 0              | -0.591772               | 3.248027  | 0.229958  |
| 29               | 1                | 0              | -2.506789               | 2.049155  | 0.448258  |

0661aaa\_Ph\_NMeBn\_CHC\_CN\_CN\_B3lyp631pd.log

Standard orientation:

| Center Number | Atomic Number | Atomic Type | Coordinates (Angstroms) |           |           |
|---------------|---------------|-------------|-------------------------|-----------|-----------|
|               |               |             | X                       | Y         | Z         |
| 1             | 6             | 0           | 4.092606                | -1.270762 | 0.050132  |
| 2             | 6             | 0           | 3.301606                | -0.133861 | -0.027387 |
| 3             | 6             | 0           | 1.900672                | -0.221376 | -0.168205 |
| 4             | 6             | 0           | 1.283428                | -1.512172 | -0.182745 |
| 5             | 6             | 0           | 2.107277                | -2.648037 | -0.124670 |
| 6             | 6             | 0           | 3.489606                | -2.529184 | -0.013012 |
| 7             | 1             | 0           | 5.169695                | -1.178107 | 0.139862  |
| 8             | 1             | 0           | 3.774579                | 0.840367  | -0.024784 |
| 9             | 1             | 0           | 1.663671                | -3.635888 | -0.137705 |
| 10            | 1             | 0           | 4.097240                | -3.427804 | 0.041746  |
| 11            | 7             | 0           | -0.121607               | -1.622212 | -0.276023 |
| 12            | 6             | 0           | -0.908062               | -1.074498 | 0.844726  |
| 13            | 1             | 0           | -0.344147               | -0.246400 | 1.283338  |
| 14            | 1             | 0           | -1.000478               | -1.833496 | 1.640493  |
| 15            | 6             | 0           | -0.654277               | -2.900026 | -0.744822 |
| 16            | 1             | 0           | -1.708952               | -2.767016 | -0.993090 |
| 17            | 1             | 0           | -0.125278               | -3.218003 | -1.645495 |
| 18            | 1             | 0           | -0.584864               | -3.699241 | 0.011111  |
| 19            | 6             | 0           | -2.296545               | -0.587261 | 0.464350  |
| 20            | 6             | 0           | -3.290254               | -0.538850 | 1.450511  |
| 21            | 6             | 0           | -2.605833               | -0.134062 | -0.823203 |
| 22            | 6             | 0           | -4.557046               | -0.032642 | 1.163278  |
| 23            | 1             | 0           | -3.068247               | -0.897429 | 2.453053  |
| 24            | 6             | 0           | -3.875938               | 0.366904  | -1.114970 |
| 25            | 1             | 0           | -1.853471               | -0.189890 | -1.603948 |
| 26            | 6             | 0           | -4.853987               | 0.423355  | -0.122479 |
| 27            | 1             | 0           | -5.313606               | 0.000381  | 1.941799  |
| 28            | 1             | 0           | -4.098124               | 0.714790  | -2.119427 |
| 29            | 1             | 0           | -5.840891               | 0.815280  | -0.349073 |
| 30            | 6             | 0           | 1.078733                | 0.944149  | -0.428995 |
| 31            | 6             | 0           | 1.298493                | 2.264683  | -0.146198 |
| 32            | 1             | 0           | 0.144732                | 0.733446  | -0.941796 |
| 33            | 6             | 0           | 0.356854                | 3.248940  | -0.596219 |
| 34            | 7             | 0           | -0.407063               | 4.046182  | -0.963720 |
| 35            | 6             | 0           | 2.410221                | 2.770308  | 0.602586  |
| 36            | 7             | 0           | 3.303357                | 3.201083  | 1.212292  |

0661aaa\_Ph\_NMeBn\_CHC\_CN\_CN\_B3lyp631pd\_PCMacn.log

Standard orientation:

| Center Number | Atomic Number | Atomic Type | Coordinates (Angstroms) |           |           |
|---------------|---------------|-------------|-------------------------|-----------|-----------|
|               |               |             | X                       | Y         | Z         |
| 1             | 6             | 0           | 4.181593                | -0.900135 | -0.051828 |
| 2             | 6             | 0           | 3.262962                | 0.134671  | -0.089162 |
| 3             | 6             | 0           | 1.872038                | -0.114299 | -0.153920 |
| 4             | 6             | 0           | 1.402942                | -1.469795 | -0.119432 |
| 5             | 6             | 0           | 2.359748                | -2.503256 | -0.111327 |
| 6             | 6             | 0           | 3.720318                | -2.222443 | -0.078309 |
| 7             | 1             | 0           | 5.244572                | -0.686610 | -0.026182 |
| 8             | 1             | 0           | 3.620181                | 1.156320  | -0.128699 |
| 9             | 1             | 0           | 2.037467                | -3.536284 | -0.093369 |
| 10            | 1             | 0           | 4.429027                | -3.044832 | -0.054579 |
| 11            | 7             | 0           | 0.030483                | -1.750468 | -0.117841 |
| 12            | 6             | 0           | -0.812271               | -1.172804 | 0.943225  |
| 13            | 1             | 0           | -0.279179               | -0.331264 | 1.393061  |
| 14            | 1             | 0           | -0.935425               | -1.914235 | 1.748464  |
| 15            | 6             | 0           | -0.384545               | -3.108327 | -0.473986 |
| 16            | 1             | 0           | -1.459711               | -3.102457 | -0.661247 |
| 17            | 1             | 0           | 0.119303                | -3.430220 | -1.386965 |
| 18            | 1             | 0           | -0.182543               | -3.836658 | 0.325371  |
| 19            | 6             | 0           | -2.188066               | -0.710319 | 0.486962  |
| 20            | 6             | 0           | -3.165344               | -0.452942 | 1.459419  |
| 21            | 6             | 0           | -2.507988               | -0.499913 | -0.858985 |
| 22            | 6             | 0           | -4.426274               | 0.017963  | 1.096282  |
| 23            | 1             | 0           | -2.934835               | -0.621329 | 2.508722  |
| 24            | 6             | 0           | -3.774084               | -0.033288 | -1.225701 |
| 25            | 1             | 0           | -1.768391               | -0.715497 | -1.624072 |
| 26            | 6             | 0           | -4.735623               | 0.230280  | -0.250589 |
| 27            | 1             | 0           | -5.169506               | 0.214443  | 1.863500  |
| 28            | 1             | 0           | -4.005517               | 0.120663  | -2.275640 |

|    |   |   |           |          |           |
|----|---|---|-----------|----------|-----------|
| 29 | 1 | 0 | -5.718993 | 0.592514 | -0.534937 |
| 30 | 6 | 0 | 0.923556  | 0.942822 | -0.404117 |
| 31 | 6 | 0 | 1.011825  | 2.292931 | -0.167525 |
| 32 | 1 | 0 | -0.003971 | 0.624787 | -0.871676 |
| 33 | 6 | 0 | -0.041787 | 3.156978 | -0.607489 |
| 34 | 7 | 0 | -0.894560 | 3.866866 | -0.961028 |
| 35 | 6 | 0 | 2.074607  | 2.942178 | 0.535399  |
| 36 | 7 | 0 | 2.916344  | 3.502008 | 1.113831  |

0661aaa\_Ph\_NMeBn\_CHC\_CN\_CN\_B3lyp631pd\_PCMdce.log

Standard orientation:

| Center<br>Number | Atomic<br>Number | Atomic<br>Type | Coordinates (Angstroms) |           |           |
|------------------|------------------|----------------|-------------------------|-----------|-----------|
|                  |                  |                | X                       | Y         | Z         |
| 1                | 6                | 0              | 4.173186                | -0.945784 | -0.042436 |
| 2                | 6                | 0              | 3.268882                | 0.101909  | -0.084913 |
| 3                | 6                | 0              | 1.875542                | -0.127853 | -0.156705 |
| 4                | 6                | 0              | 1.388134                | -1.476421 | -0.126039 |
| 5                | 6                | 0              | 2.329857                | -2.522866 | -0.111553 |
| 6                | 6                | 0              | 3.694388                | -2.261217 | -0.071020 |
| 7                | 1                | 0              | 5.238778                | -0.746485 | -0.010727 |
| 8                | 1                | 0              | 3.640394                | 1.118538  | -0.121600 |
| 9                | 1                | 0              | 1.992846                | -3.551294 | -0.095738 |
| 10               | 1                | 0              | 4.391532                | -3.093355 | -0.043351 |
| 11               | 7                | 0              | 0.010301                | -1.736971 | -0.134855 |
| 12               | 6                | 0              | -0.824598               | -1.159016 | 0.932536  |
| 13               | 1                | 0              | -0.287288               | -0.317696 | 1.377850  |
| 14               | 1                | 0              | -0.943543               | -1.899791 | 1.739405  |
| 15               | 6                | 0              | -0.419980               | -3.087423 | -0.499808 |
| 16               | 1                | 0              | -1.493799               | -3.067022 | -0.693781 |
| 17               | 1                | 0              | 0.085817                | -3.411544 | -1.410994 |
| 18               | 1                | 0              | -0.232681               | -3.822610 | 0.297237  |
| 19               | 6                | 0              | -2.202248               | -0.694550 | 0.484550  |
| 20               | 6                | 0              | -3.180241               | -0.456176 | 1.460799  |
| 21               | 6                | 0              | -2.522221               | -0.461592 | -0.857641 |
| 22               | 6                | 0              | -4.441861               | 0.018732  | 1.105520  |
| 23               | 1                | 0              | -2.949774               | -0.642215 | 2.507152  |
| 24               | 6                | 0              | -3.788869               | 0.008782  | -1.216574 |
| 25               | 1                | 0              | -1.782056               | -0.663024 | -1.626023 |
| 26               | 6                | 0              | -4.751022               | 0.253830  | -0.237331 |
| 27               | 1                | 0              | -5.185641               | 0.200680  | 1.875775  |
| 28               | 1                | 0              | -4.020231               | 0.180983  | -2.263671 |
| 29               | 1                | 0              | -5.734767               | 0.619628  | -0.515694 |
| 30               | 6                | 0              | 0.941668                | 0.943308  | -0.408578 |
| 31               | 6                | 0              | 1.046825                | 2.290300  | -0.165385 |
| 32               | 1                | 0              | 0.012832                | 0.638930  | -0.882683 |
| 33               | 6                | 0              | 0.008376                | 3.171529  | -0.608606 |
| 34               | 7                | 0              | -0.831277               | 3.894898  | -0.965737 |
| 35               | 6                | 0              | 2.115785                | 2.920937  | 0.545875  |
| 36               | 7                | 0              | 2.963542                | 3.464601  | 1.130693  |

0661aaa\_Ph\_NMeBn\_CHC\_CN\_CN\_B3lyp631pd\_PCMtol.log

Standard orientation:

| Center<br>Number | Atomic<br>Number | Atomic<br>Type | Coordinates (Angstroms) |           |           |
|------------------|------------------|----------------|-------------------------|-----------|-----------|
|                  |                  |                | X                       | Y         | Z         |
| 1                | 6                | 0              | 4.126140                | -1.155942 | 0.015769  |
| 2                | 6                | 0              | 3.292916                | -0.050171 | -0.048128 |
| 3                | 6                | 0              | 1.892305                | -0.189281 | -0.163091 |
| 4                | 6                | 0              | 1.320347                | -1.502514 | -0.161229 |
| 5                | 6                | 0              | 2.188550                | -2.607507 | -0.120183 |
| 6                | 6                | 0              | 3.566519                | -2.436463 | -0.034917 |
| 7                | 1                | 0              | 5.200710                | -1.024937 | 0.083400  |
| 8                | 1                | 0              | 3.730335                | 0.940431  | -0.061585 |
| 9                | 1                | 0              | 1.783301                | -3.611509 | -0.122691 |
| 10               | 1                | 0              | 4.207428                | -3.312085 | 0.009613  |
| 11               | 7                | 0              | -0.076587               | -1.667123 | -0.223294 |
| 12               | 6                | 0              | -0.879541               | -1.103751 | 0.877471  |
| 13               | 1                | 0              | -0.324267               | -0.270402 | 1.316456  |
| 14               | 1                | 0              | -0.982037               | -1.853895 | 1.679264  |

|    |   |   |           |           |           |
|----|---|---|-----------|-----------|-----------|
| 15 | 6 | 0 | -0.575089 | -2.973904 | -0.651520 |
| 16 | 1 | 0 | -1.638225 | -2.881266 | -0.880608 |
| 17 | 1 | 0 | -0.055593 | -3.296229 | -1.555864 |
| 18 | 1 | 0 | -0.462609 | -3.749184 | 0.122524  |
| 19 | 6 | 0 | -2.264140 | -0.624214 | 0.471804  |
| 20 | 6 | 0 | -3.251513 | -0.504175 | 1.459100  |
| 21 | 6 | 0 | -2.578415 | -0.253638 | -0.840663 |
| 22 | 6 | 0 | -4.516755 | -0.008964 | 1.146686  |
| 23 | 1 | 0 | -3.025692 | -0.798370 | 2.481457  |
| 24 | 6 | 0 | -3.847631 | 0.236658  | -1.157229 |
| 25 | 1 | 0 | -1.831751 | -0.365638 | -1.620894 |
| 26 | 6 | 0 | -4.819282 | 0.364308  | -0.164991 |
| 27 | 1 | 0 | -5.268119 | 0.080115  | 1.925843  |
| 28 | 1 | 0 | -4.074170 | 0.518232  | -2.181354 |
| 29 | 1 | 0 | -5.805321 | 0.746743  | -0.410834 |
| 30 | 6 | 0 | 1.030090  | 0.942917  | -0.422719 |
| 31 | 6 | 0 | 1.209628  | 2.274773  | -0.154518 |
| 32 | 1 | 0 | 0.097603  | 0.698704  | -0.923629 |
| 33 | 6 | 0 | 0.236432  | 3.224556  | -0.608100 |
| 34 | 7 | 0 | -0.550421 | 3.999140  | -0.976593 |
| 35 | 6 | 0 | 2.303340  | 2.826020  | 0.586761  |
| 36 | 7 | 0 | 3.176293  | 3.300418  | 1.193755  |

0661aaa\_Ph\_NMeBn\_CHC\_CN\_CN\_B3lyp631pd\_PCMw.log

Standard orientation:

| Center<br>Number | Atomic<br>Number | Atomic<br>Type | Coordinates (Angstroms) |           |           |
|------------------|------------------|----------------|-------------------------|-----------|-----------|
|                  |                  |                | X                       | Y         | Z         |
| 1                | 6                | 0              | 4.183273                | -0.892066 | -0.052827 |
| 2                | 6                | 0              | 3.262287                | 0.140567  | -0.089423 |
| 3                | 6                | 0              | 1.871813                | -0.111714 | -0.153541 |
| 4                | 6                | 0              | 1.405820                | -1.468393 | -0.118834 |
| 5                | 6                | 0              | 2.365119                | -2.499643 | -0.111671 |
| 6                | 6                | 0              | 3.724968                | -2.215541 | -0.079336 |
| 7                | 1                | 0              | 5.245792                | -0.676197 | -0.027847 |
| 8                | 1                | 0              | 3.617098                | 1.163048  | -0.129243 |
| 9                | 1                | 0              | 2.045354                | -3.533442 | -0.093701 |
| 10               | 1                | 0              | 4.435627                | -3.036244 | -0.056108 |
| 11               | 7                | 0              | 0.034262                | -1.752329 | -0.116036 |
| 12               | 6                | 0              | -0.809816               | -1.175511 | 0.944444  |
| 13               | 1                | 0              | -0.277606               | -0.334020 | 1.395399  |
| 14               | 1                | 0              | -0.933394               | -1.917500 | 1.749003  |
| 15               | 6                | 0              | -0.377997               | -3.111316 | -0.471487 |
| 16               | 1                | 0              | -1.453261               | -3.107810 | -0.658241 |
| 17               | 1                | 0              | 0.126066                | -3.432437 | -1.384594 |
| 18               | 1                | 0              | -0.173981               | -3.838729 | 0.328095  |
| 19               | 6                | 0              | -2.185452               | -0.713407 | 0.487210  |
| 20               | 6                | 0              | -3.162628               | -0.453752 | 1.459247  |
| 21               | 6                | 0              | -2.505533               | -0.505911 | -0.859180 |
| 22               | 6                | 0              | -4.423571               | 0.016517  | 1.095210  |
| 23               | 1                | 0              | -2.932039               | -0.619960 | 2.508868  |
| 24               | 6                | 0              | -3.771641               | -0.039849 | -1.226788 |
| 25               | 1                | 0              | -1.766152               | -0.723395 | -1.623934 |
| 26               | 6                | 0              | -4.733084               | 0.225964  | -0.252137 |
| 27               | 1                | 0              | -5.166723               | 0.214642  | 1.862087  |
| 28               | 1                | 0              | -4.003217               | 0.111610  | -2.277065 |
| 29               | 1                | 0              | -5.716504               | 0.587544  | -0.537166 |
| 30               | 6                | 0              | 0.920827                | 0.942819  | -0.403560 |
| 31               | 6                | 0              | 1.005698                | 2.293475  | -0.167806 |
| 32               | 1                | 0              | -0.006236               | 0.622226  | -0.870244 |
| 33               | 6                | 0              | -0.050898               | 3.154068  | -0.607007 |
| 34               | 7                | 0              | -0.906500               | 3.861101  | -0.959563 |
| 35               | 6                | 0              | 2.066833                | 2.946201  | 0.534186  |
| 36               | 7                | 0              | 2.906963                | 3.509172  | 1.111955  |

0662dab\_Ph\_NMeBn\_CHC\_CN\_CN\_ZWion\_B3lyp631pd\_PCMacn\_TS\_HC.log

Standard orientation:

| Center<br>Number | Atomic<br>Number | Atomic<br>Type | Coordinates (Angstroms) |   |   |
|------------------|------------------|----------------|-------------------------|---|---|
|                  |                  |                | X                       | Y | Z |

|    |   |   |           |           |           |
|----|---|---|-----------|-----------|-----------|
| 1  | 6 | 0 | 4.158161  | -1.071979 | -0.154824 |
| 2  | 6 | 0 | 3.268317  | -0.042488 | -0.467958 |
| 3  | 6 | 0 | 1.885737  | -0.223580 | -0.366653 |
| 4  | 6 | 0 | 1.404376  | -1.487404 | 0.041667  |
| 5  | 6 | 0 | 2.293055  | -2.515240 | 0.361649  |
| 6  | 6 | 0 | 3.668979  | -2.309579 | 0.260829  |
| 7  | 1 | 0 | 5.227263  | -0.899906 | -0.225523 |
| 8  | 1 | 0 | 3.645321  | 0.921631  | -0.794650 |
| 9  | 1 | 0 | 1.904801  | -3.470495 | 0.699123  |
| 10 | 1 | 0 | 4.352193  | -3.112906 | 0.516644  |
| 11 | 7 | 0 | -0.011441 | -1.713989 | 0.089178  |
| 12 | 6 | 0 | -0.730819 | -0.596093 | 0.465007  |
| 13 | 1 | 0 | -0.350645 | -0.164622 | 1.394831  |
| 14 | 6 | 0 | -0.544841 | -2.738753 | -0.816052 |
| 15 | 1 | 0 | -1.582620 | -2.946217 | -0.557904 |
| 16 | 1 | 0 | -0.482183 | -2.440839 | -1.869866 |
| 17 | 1 | 0 | 0.034890  | -3.652412 | -0.682964 |
| 18 | 6 | 0 | -2.192943 | -0.449477 | 0.299910  |
| 19 | 6 | 0 | -2.939985 | -0.046761 | 1.421897  |
| 20 | 6 | 0 | -2.852837 | -0.617429 | -0.932266 |
| 21 | 6 | 0 | -4.317005 | 0.143184  | 1.325672  |
| 22 | 1 | 0 | -2.437952 | 0.104720  | 2.372828  |
| 23 | 6 | 0 | -4.227386 | -0.417365 | -1.025782 |
| 24 | 1 | 0 | -2.290746 | -0.878501 | -1.821888 |
| 25 | 6 | 0 | -4.963856 | -0.043622 | 0.102410  |
| 26 | 1 | 0 | -4.882086 | 0.441542  | 2.202910  |
| 27 | 1 | 0 | -4.723929 | -0.545327 | -1.982318 |
| 28 | 1 | 0 | -6.035533 | 0.110669  | 0.024396  |
| 29 | 6 | 0 | 0.946930  | 0.894444  | -0.756285 |
| 30 | 6 | 0 | 1.154212  | 2.217836  | -0.230501 |
| 31 | 1 | 0 | 0.683881  | 0.898551  | -1.818851 |
| 32 | 6 | 0 | 0.586377  | 3.334819  | -0.885596 |
| 33 | 7 | 0 | 0.124872  | 4.255839  | -1.440916 |
| 34 | 6 | 0 | 1.775896  | 2.446997  | 1.019116  |
| 35 | 7 | 0 | 2.296550  | 2.650717  | 2.047402  |
| 36 | 1 | 0 | -0.166730 | 0.421084  | -0.299868 |

0662dab\_Ph\_NMeBn\_CHC\_CN\_CN\_ZWion\_B3lyp631pd\_PCMdce\_TS\_HC.log

Standard orientation:

| Center<br>Number | Atomic<br>Number | Atomic<br>Type | Coordinates (Angstroms) |           |           |
|------------------|------------------|----------------|-------------------------|-----------|-----------|
|                  |                  |                | X                       | Y         | Z         |
| 1                | 6                | 0              | 4.159107                | -1.066636 | -0.142366 |
| 2                | 6                | 0              | 3.268928                | -0.037883 | -0.456292 |
| 3                | 6                | 0              | 1.886273                | -0.222157 | -0.363564 |
| 4                | 6                | 0              | 1.406160                | -1.488056 | 0.038310  |
| 5                | 6                | 0              | 2.294772                | -2.515784 | 0.358798  |
| 6                | 6                | 0              | 3.670627                | -2.307055 | 0.265598  |
| 7                | 1                | 0              | 5.228209                | -0.891739 | -0.205825 |
| 8                | 1                | 0              | 3.645257                | 0.928833  | -0.775914 |
| 9                | 1                | 0              | 1.906587                | -3.472725 | 0.691759  |
| 10               | 1                | 0              | 4.354389                | -3.109721 | 0.522129  |
| 11               | 7                | 0              | -0.010162               | -1.716770 | 0.080909  |
| 12               | 6                | 0              | -0.732492               | -0.605091 | 0.464279  |
| 13               | 1                | 0              | -0.348113               | -0.172240 | 1.391437  |
| 14               | 6                | 0              | -0.540312               | -2.741344 | -0.825452 |
| 15               | 1                | 0              | -1.577477               | -2.952795 | -0.567876 |
| 16               | 1                | 0              | -0.478527               | -2.442100 | -1.879159 |
| 17               | 1                | 0              | 0.042567                | -3.653348 | -0.694504 |
| 18               | 6                | 0              | -2.192962               | -0.455568 | 0.300735  |
| 19               | 6                | 0              | -2.934803               | -0.036832 | 1.420676  |
| 20               | 6                | 0              | -2.858630               | -0.633557 | -0.927231 |
| 21               | 6                | 0              | -4.310981               | 0.158714  | 1.327215  |
| 22               | 1                | 0              | -2.428699               | 0.123298  | 2.368039  |
| 23               | 6                | 0              | -4.232359               | -0.428046 | -1.017978 |
| 24               | 1                | 0              | -2.301556               | -0.905496 | -1.816733 |
| 25               | 6                | 0              | -4.963113               | -0.038562 | 0.108526  |
| 26               | 1                | 0              | -4.871314               | 0.469985  | 2.202996  |
| 27               | 1                | 0              | -4.732833               | -0.563231 | -1.971484 |
| 28               | 1                | 0              | -6.034236               | 0.120380  | 0.032428  |
| 29               | 6                | 0              | 0.945691                | 0.894794  | -0.755426 |
| 30               | 6                | 0              | 1.154624                | 2.220718  | -0.233219 |
| 31               | 1                | 0              | 0.692185                | 0.899557  | -1.820586 |

|    |   |   |           |          |           |
|----|---|---|-----------|----------|-----------|
| 32 | 6 | 0 | 0.593235  | 3.335155 | -0.898211 |
| 33 | 7 | 0 | 0.136021  | 4.251234 | -1.464996 |
| 34 | 6 | 0 | 1.764050  | 2.450266 | 1.022348  |
| 35 | 7 | 0 | 2.273977  | 2.650609 | 2.056566  |
| 36 | 1 | 0 | -0.162176 | 0.427372 | -0.304534 |

0662dab\_Ph\_NMeBn\_CHC\_CN\_CN\_ZWion\_B3lyp631pd\_PCMtol\_TS\_HC\_f2.log

Standard orientation:

| Center<br>Number | Atomic<br>Number | Atomic<br>Type | Coordinates (Angstroms) |           |           |
|------------------|------------------|----------------|-------------------------|-----------|-----------|
|                  |                  |                | X                       | Y         | Z         |
| 1                | 6                | 0              | 1.499643                | -3.183831 | 0.330181  |
| 2                | 6                | 0              | 2.073541                | -1.921509 | 0.325695  |
| 3                | 6                | 0              | 1.436922                | -0.832588 | -0.308960 |
| 4                | 6                | 0              | 0.148969                | -1.027009 | -0.901456 |
| 5                | 6                | 0              | -0.397622               | -2.321194 | -0.910730 |
| 6                | 6                | 0              | 0.269030                | -3.382202 | -0.305930 |
| 7                | 1                | 0              | 2.013938                | -4.012654 | 0.804728  |
| 8                | 1                | 0              | 3.051408                | -1.782242 | 0.770391  |
| 9                | 1                | 0              | -1.367508               | -2.490316 | -1.362767 |
| 10               | 1                | 0              | -0.185013               | -4.368741 | -0.313431 |
| 11               | 7                | 0              | -0.516842               | 0.067853  | -1.482394 |
| 12               | 6                | 0              | -0.939792               | 1.183013  | -0.595446 |
| 13               | 1                | 0              | -0.141023               | 1.366022  | 0.125350  |
| 14               | 6                | 0              | -1.475971               | -0.218780 | -2.547339 |
| 15               | 1                | 0              | -2.434689               | -0.618171 | -2.188311 |
| 16               | 1                | 0              | -1.683301               | 0.711690  | -3.084318 |
| 17               | 1                | 0              | -1.037558               | -0.929217 | -3.251236 |
| 18               | 6                | 0              | -2.248222               | 0.947510  | 0.140411  |
| 19               | 6                | 0              | -2.292341               | 0.121350  | 1.273460  |
| 20               | 6                | 0              | -3.435673               | 1.544051  | -0.301802 |
| 21               | 6                | 0              | -3.495090               | -0.106392 | 1.941589  |
| 22               | 1                | 0              | -1.378732               | -0.339155 | 1.639130  |
| 23               | 6                | 0              | -4.641541               | 1.319614  | 0.365637  |
| 24               | 1                | 0              | -3.414416               | 2.197018  | -1.171063 |
| 25               | 6                | 0              | -4.673720               | 0.491446  | 1.488098  |
| 26               | 1                | 0              | -3.511624               | -0.743914 | 2.820733  |
| 27               | 1                | 0              | -5.552058               | 1.793876  | 0.011162  |
| 28               | 1                | 0              | -5.609351               | 0.317364  | 2.011213  |
| 29               | 6                | 0              | 2.095123                | 0.437736  | -0.519852 |
| 30               | 6                | 0              | 3.116411                | 1.034571  | 0.171841  |
| 31               | 1                | 0              | 1.721572                | 0.995428  | -1.375665 |
| 32               | 6                | 0              | 3.659716                | 2.273147  | -0.302346 |
| 33               | 7                | 0              | 4.096277                | 3.281012  | -0.688066 |
| 34               | 6                | 0              | 3.689376                | 0.532395  | 1.383716  |
| 35               | 7                | 0              | 4.166203                | 0.147678  | 2.373743  |
| 36               | 1                | 0              | -1.023663               | 2.079245  | -1.219511 |

0662dab\_Ph\_NMeBn\_CHC\_CN\_CN\_ZWion\_B3lyp631pd\_PCMw\_TS\_HC.log

Standard orientation:

| Center<br>Number | Atomic<br>Number | Atomic<br>Type | Coordinates (Angstroms) |           |           |
|------------------|------------------|----------------|-------------------------|-----------|-----------|
|                  |                  |                | X                       | Y         | Z         |
| 1                | 6                | 0              | 4.157999                | -1.073113 | -0.158667 |
| 2                | 6                | 0              | 3.268114                | -0.043470 | -0.471349 |
| 3                | 6                | 0              | 1.885601                | -0.223753 | -0.367427 |
| 4                | 6                | 0              | 1.404024                | -1.487020 | 0.042734  |
| 5                | 6                | 0              | 2.292869                | -2.514900 | 0.362196  |
| 6                | 6                | 0              | 3.668765                | -2.310011 | 0.259012  |
| 7                | 1                | 0              | 5.227071                | -0.901744 | -0.231492 |
| 8                | 1                | 0              | 3.645134                | 0.920018  | -0.799908 |
| 9                | 1                | 0              | 1.904784                | -3.469778 | 0.700868  |
| 10               | 1                | 0              | 4.351908                | -3.113544 | 0.514350  |
| 11               | 7                | 0              | -0.011600               | -1.713097 | 0.091882  |
| 12               | 6                | 0              | -0.730415               | -0.593619 | 0.465406  |
| 13               | 1                | 0              | -0.351388               | -0.161975 | 1.395694  |
| 14               | 6                | 0              | -0.546123               | -2.738990 | -0.811590 |
| 15               | 1                | 0              | -1.583836               | -2.945423 | -0.552390 |
| 16               | 1                | 0              | -0.484059               | -2.442494 | -1.865783 |
| 17               | 1                | 0              | 0.033128                | -3.652789 | -0.677421 |



|    |   |   |           |           |           |
|----|---|---|-----------|-----------|-----------|
| 18 | 6 | 0 | -2.192886 | -0.447880 | 0.299656  |
| 19 | 6 | 0 | -2.941347 | -0.048264 | 1.421735  |
| 20 | 6 | 0 | -2.851265 | -0.614318 | -0.933471 |
| 21 | 6 | 0 | -4.318560 | 0.140193  | 1.324547  |
| 22 | 1 | 0 | -2.440407 | 0.101817  | 2.373461  |
| 23 | 6 | 0 | -4.226006 | -0.415724 | -1.027950 |
| 24 | 1 | 0 | -2.287837 | -0.873309 | -1.822864 |
| 25 | 6 | 0 | -4.964003 | -0.045015 | 0.100268  |
| 26 | 1 | 0 | -4.884889 | 0.436041  | 2.201835  |
| 27 | 1 | 0 | -4.721490 | -0.542681 | -1.985166 |
| 28 | 1 | 0 | -6.035814 | 0.107998  | 0.021557  |
| 29 | 6 | 0 | 0.947168  | 0.894501  | -0.756537 |
| 30 | 6 | 0 | 1.154081  | 2.217275  | -0.229783 |
| 31 | 1 | 0 | 0.681925  | 0.898484  | -1.818493 |
| 32 | 6 | 0 | 0.584520  | 3.334870  | -0.882320 |
| 33 | 7 | 0 | 0.121732  | 4.256896  | -1.434923 |
| 34 | 6 | 0 | 1.778775  | 2.446101  | 1.018385  |
| 35 | 7 | 0 | 2.302091  | 2.650259  | 2.045257  |
| 36 | 1 | 0 | -0.167671 | 0.419809  | -0.298819 |

0662dab\_Ph\_NMeBn\_CHC\_CN\_CN\_ZWion\_B3lyp631pd\_TS\_HC.log

Standard orientation:

| Center<br>Number | Atomic<br>Number | Atomic<br>Type | Coordinates (Angstroms) |           |           |
|------------------|------------------|----------------|-------------------------|-----------|-----------|
|                  |                  |                | X                       | Y         | Z         |
| 1                | 6                | 0              | 4.155066                | -1.047084 | -0.058517 |
| 2                | 6                | 0              | 3.267745                | -0.021829 | -0.385506 |
| 3                | 6                | 0              | 1.884308                | -0.218023 | -0.352351 |
| 4                | 6                | 0              | 1.406414                | -1.492393 | 0.013992  |
| 5                | 6                | 0              | 2.290647                | -2.521293 | 0.347172  |
| 6                | 6                | 0              | 3.665710                | -2.300962 | 0.305863  |
| 7                | 1                | 0              | 5.224013                | -0.860013 | -0.074918 |
| 8                | 1                | 0              | 3.641292                | 0.958599  | -0.664231 |
| 9                | 1                | 0              | 1.898771                | -3.485354 | 0.656255  |
| 10               | 1                | 0              | 4.347912                | -3.101550 | 0.573674  |
| 11               | 7                | 0              | -0.012628               | -1.735561 | 0.027954  |
| 12               | 6                | 0              | -0.763315               | -0.676675 | 0.465530  |
| 13               | 1                | 0              | -0.341968               | -0.212935 | 1.358123  |
| 14               | 6                | 0              | -0.522688               | -2.773907 | -0.866616 |
| 15               | 1                | 0              | -1.541280               | -3.036424 | -0.580639 |
| 16               | 1                | 0              | -0.508323               | -2.465640 | -1.920796 |
| 17               | 1                | 0              | 0.107136                | -3.658494 | -0.767208 |
| 18               | 6                | 0              | -2.205360               | -0.494939 | 0.304703  |
| 19               | 6                | 0              | -2.902071               | 0.084439  | 1.386447  |
| 20               | 6                | 0              | -2.922309               | -0.776085 | -0.878479 |
| 21               | 6                | 0              | -4.267348               | 0.337193  | 1.304399  |
| 22               | 1                | 0              | -2.361752               | 0.328800  | 2.296328  |
| 23               | 6                | 0              | -4.286142               | -0.516408 | -0.955951 |
| 24               | 1                | 0              | -2.409252               | -1.162603 | -1.751004 |
| 25               | 6                | 0              | -4.966140               | 0.033189  | 0.134660  |
| 26               | 1                | 0              | -4.784579               | 0.776412  | 2.151534  |
| 27               | 1                | 0              | -4.819828               | -0.731076 | -1.876606 |
| 28               | 1                | 0              | -6.030481               | 0.235222  | 0.066559  |
| 29               | 6                | 0              | 0.945755                | 0.901329  | -0.766928 |
| 30               | 6                | 0              | 1.187373                | 2.240776  | -0.256065 |
| 31               | 1                | 0              | 0.777435                | 0.917784  | -1.850345 |
| 32               | 6                | 0              | 0.702645                | 3.354076  | -0.979108 |
| 33               | 7                | 0              | 0.303218                | 4.254230  | -1.610477 |
| 34               | 6                | 0              | 1.688237                | 2.441006  | 1.050510  |
| 35               | 7                | 0              | 2.105745                | 2.578369  | 2.135092  |
| 36               | 1                | 0              | -0.124600               | 0.503556  | -0.367238 |

0662eab\_Ph\_NMeBn\_CHC\_CN\_CN\_ZWion\_B3lyp631pd\_PCmacn\_TS\_HC.log

Standard orientation:

| Center<br>Number | Atomic<br>Number | Atomic<br>Type | Coordinates (Angstroms) |           |           |
|------------------|------------------|----------------|-------------------------|-----------|-----------|
|                  |                  |                | X                       | Y         | Z         |
| 1                | 6                | 0              | -4.197368               | -0.892303 | -0.566351 |
| 2                | 6                | 0              | -3.260540               | 0.110720  | -0.788500 |
| 3                | 6                | 0              | -1.888055               | -0.121532 | -0.609915 |

|    |   |   |           |           |           |
|----|---|---|-----------|-----------|-----------|
| 4  | 6 | 0 | -1.474935 | -1.395176 | -0.151712 |
| 5  | 6 | 0 | -2.424711 | -2.401818 | 0.081877  |
| 6  | 6 | 0 | -3.774638 | -2.152751 | -0.129183 |
| 7  | 1 | 0 | -5.250640 | -0.697248 | -0.739712 |
| 8  | 1 | 0 | -3.581105 | 1.093840  | -1.119495 |
| 9  | 1 | 0 | -2.098142 | -3.380623 | 0.415308  |
| 10 | 1 | 0 | -4.498292 | -2.943238 | 0.042005  |
| 11 | 7 | 0 | -0.100979 | -1.613565 | 0.134735  |
| 12 | 6 | 0 | 0.771895  | -0.898870 | -0.663354 |
| 13 | 1 | 0 | 0.592085  | -1.067142 | -1.726949 |
| 14 | 6 | 0 | 0.249001  | -2.104229 | 1.473670  |
| 15 | 1 | 0 | 1.302071  | -2.378769 | 1.495010  |
| 16 | 1 | 0 | 0.046830  | -1.356941 | 2.249538  |
| 17 | 1 | 0 | -0.343481 | -2.993445 | 1.688790  |
| 18 | 6 | 0 | 2.189922  | -0.656332 | -0.321765 |
| 19 | 6 | 0 | 3.165012  | -0.925592 | -1.298507 |
| 20 | 6 | 0 | 2.589546  | -0.090690 | 0.903640  |
| 21 | 6 | 0 | 4.511084  | -0.672990 | -1.042371 |
| 22 | 1 | 0 | 2.864199  | -1.343544 | -2.254627 |
| 23 | 6 | 0 | 3.935158  | 0.168073  | 1.151747  |
| 24 | 1 | 0 | 1.848367  | 0.165734  | 1.652848  |
| 25 | 6 | 0 | 4.899106  | -0.127639 | 0.183567  |
| 26 | 1 | 0 | 5.254901  | -0.897397 | -1.800231 |
| 27 | 1 | 0 | 4.231251  | 0.607987  | 2.098713  |
| 28 | 1 | 0 | 5.947093  | 0.074929  | 0.381354  |
| 29 | 6 | 0 | -0.913316 | 0.996168  | -0.849835 |
| 30 | 6 | 0 | -1.005785 | 2.179616  | -0.037020 |
| 31 | 1 | 0 | -0.737400 | 1.210319  | -1.906837 |
| 32 | 6 | 0 | -0.509496 | 3.416076  | -0.510071 |
| 33 | 7 | 0 | -0.103964 | 4.436411  | -0.914986 |
| 34 | 6 | 0 | -1.456122 | 2.120298  | 1.302236  |
| 35 | 7 | 0 | -1.825135 | 2.066226  | 2.411532  |
| 36 | 1 | 0 | 0.198254  | 0.375866  | -0.663592 |

0662eab\_Ph\_NMeBn\_CHC\_CN\_CN\_ZWion\_B3lyp631pd\_PCMdce\_TS\_HC\_f.log

Standard orientation:

| Center<br>Number | Atomic<br>Number | Atomic<br>Type | Coordinates (Angstroms) |           |           |
|------------------|------------------|----------------|-------------------------|-----------|-----------|
|                  |                  |                | X                       | Y         | Z         |
| 1                | 6                | 0              | -4.231013               | -0.812357 | -0.610887 |
| 2                | 6                | 0              | -3.271153               | 0.164467  | -0.855610 |
| 3                | 6                | 0              | -1.908888               | -0.085802 | -0.635231 |
| 4                | 6                | 0              | -1.532484               | -1.345345 | -0.117036 |
| 5                | 6                | 0              | -2.502053               | -2.324774 | 0.139123  |
| 6                | 6                | 0              | -3.843107               | -2.060306 | -0.111322 |
| 7                | 1                | 0              | -5.276727               | -0.605246 | -0.813824 |
| 8                | 1                | 0              | -3.567479               | 1.138846  | -1.232044 |
| 9                | 1                | 0              | -2.196343               | -3.292471 | 0.522420  |
| 10               | 1                | 0              | -4.586134               | -2.828374 | 0.078035  |
| 11               | 7                | 0              | -0.163781               | -1.576114 | 0.203882  |
| 12               | 6                | 0              | 0.727429                | -0.952290 | -0.648026 |
| 13               | 1                | 0              | 0.539355                | -1.202862 | -1.693822 |
| 14               | 6                | 0              | 0.147604                | -1.895139 | 1.602887  |
| 15               | 1                | 0              | 1.186719                | -2.210773 | 1.682308  |
| 16               | 1                | 0              | -0.032099               | -1.041551 | 2.267968  |
| 17               | 1                | 0              | -0.491761               | -2.718600 | 1.921663  |
| 18               | 6                | 0              | 2.151688                | -0.717621 | -0.328438 |
| 19               | 6                | 0              | 3.116545                | -1.097804 | -1.278466 |
| 20               | 6                | 0              | 2.571100                | -0.056312 | 0.841478  |
| 21               | 6                | 0              | 4.469529                | -0.859526 | -1.047845 |
| 22               | 1                | 0              | 2.801483                | -1.590310 | -2.193678 |
| 23               | 6                | 0              | 3.924155                | 0.187688  | 1.063287  |
| 24               | 1                | 0              | 1.841456                | 0.286585  | 1.566736  |
| 25               | 6                | 0              | 4.876406                | -0.218138 | 0.124316  |
| 26               | 1                | 0              | 5.204279                | -1.169741 | -1.784015 |
| 27               | 1                | 0              | 4.234933                | 0.702425  | 1.966829  |
| 28               | 1                | 0              | 5.930049                | -0.026430 | 0.301831  |
| 29               | 6                | 0              | -0.900879               | 1.000444  | -0.893386 |
| 30               | 6                | 0              | -0.917025               | 2.164751  | -0.048606 |
| 31               | 1                | 0              | -0.762771               | 1.231814  | -1.952291 |
| 32               | 6                | 0              | -0.401080               | 3.397431  | -0.511392 |
| 33               | 7                | 0              | 0.018358                | 4.414007  | -0.910741 |
| 34               | 6                | 0              | -1.290085               | 2.069068  | 1.312180  |

|    |   |   |           |          |           |
|----|---|---|-----------|----------|-----------|
| 35 | 7 | 0 | -1.588150 | 1.967245 | 2.439404  |
| 36 | 1 | 0 | 0.189923  | 0.340109 | -0.748083 |

0662eab\_Ph\_NMeBn\_CHC\_CN\_CN\_ZWion\_B3lyp631pd\_PCMtol\_TS\_HC\_f3.log

Standard orientation:

| Center<br>Number | Atomic<br>Number | Atomic<br>Type | Coordinates (Angstroms) |           |           |
|------------------|------------------|----------------|-------------------------|-----------|-----------|
|                  |                  |                | X                       | Y         | Z         |
| 1                | 6                | 0              | -3.960963               | -1.416603 | 0.254446  |
| 2                | 6                | 0              | -3.250337               | -0.282689 | -0.101520 |
| 3                | 6                | 0              | -1.868579               | -0.300514 | -0.399561 |
| 4                | 6                | 0              | -1.141815               | -1.539324 | -0.272272 |
| 5                | 6                | 0              | -1.911051               | -2.684389 | 0.059935  |
| 6                | 6                | 0              | -3.272747               | -2.628442 | 0.317051  |
| 7                | 1                | 0              | -5.025711               | -1.360003 | 0.451133  |
| 8                | 1                | 0              | -3.777036               | 0.659129  | -0.210981 |
| 9                | 1                | 0              | -1.426491               | -3.648805 | 0.112771  |
| 10               | 1                | 0              | -3.798613               | -3.547086 | 0.560348  |
| 11               | 7                | 0              | 0.241834                | -1.677654 | -0.322750 |
| 12               | 6                | 0              | 1.149045                | -0.846990 | -1.114901 |
| 13               | 1                | 0              | 1.455038                | -1.388677 | -2.022597 |
| 14               | 6                | 0              | 0.840624                | -2.950015 | 0.074430  |
| 15               | 1                | 0              | 1.917010                | -2.805721 | 0.169681  |
| 16               | 1                | 0              | 0.458448                | -3.274283 | 1.045117  |
| 17               | 1                | 0              | 0.665062                | -3.749329 | -0.660476 |
| 18               | 6                | 0              | 2.384261                | -0.393057 | -0.353532 |
| 19               | 6                | 0              | 3.643736                | -0.441929 | -0.960527 |
| 20               | 6                | 0              | 2.274813                | 0.130447  | 0.941587  |
| 21               | 6                | 0              | 4.775192                | 0.030005  | -0.291413 |
| 22               | 1                | 0              | 3.740549                | -0.851101 | -1.963371 |
| 23               | 6                | 0              | 3.403877                | 0.597447  | 1.613306  |
| 24               | 1                | 0              | 1.302140                | 0.162806  | 1.424010  |
| 25               | 6                | 0              | 4.657467                | 0.550514  | 0.997580  |
| 26               | 1                | 0              | 5.746468                | -0.015406 | -0.775197 |
| 27               | 1                | 0              | 3.305405                | 1.000760  | 2.616873  |
| 28               | 1                | 0              | 5.536046                | 0.915227  | 1.521317  |
| 29               | 6                | 0              | -1.328215               | 0.975568  | -0.867650 |
| 30               | 6                | 0              | -1.492110               | 2.188355  | -0.260545 |
| 31               | 1                | 0              | -0.822847               | 1.013400  | -1.828046 |
| 32               | 6                | 0              | -1.044867               | 3.387148  | -0.909082 |
| 33               | 7                | 0              | -0.677990               | 4.356960  | -1.437095 |
| 34               | 6                | 0              | -2.067935               | 2.356458  | 1.042391  |
| 35               | 7                | 0              | -2.512408               | 2.529575  | 2.103544  |
| 36               | 1                | 0              | 0.622111                | 0.034994  | -1.464813 |

0662eab\_Ph\_NMeBn\_CHC\_CN\_CN\_ZWion\_B3lyp631pd\_PCMw\_TS\_HC\_f4.log

Standard orientation:

| Center<br>Number | Atomic<br>Number | Atomic<br>Type | Coordinates (Angstroms) |           |           |
|------------------|------------------|----------------|-------------------------|-----------|-----------|
|                  |                  |                | X                       | Y         | Z         |
| 1                | 6                | 0              | -4.195099               | -0.898371 | -0.562877 |
| 2                | 6                | 0              | -3.259941               | 0.106360  | -0.784197 |
| 3                | 6                | 0              | -1.886759               | -0.124397 | -0.608401 |
| 4                | 6                | 0              | -1.470892               | -1.398642 | -0.153640 |
| 5                | 6                | 0              | -2.419279               | -2.406925 | 0.079248  |
| 6                | 6                | 0              | -3.769843               | -2.159185 | -0.129107 |
| 7                | 1                | 0              | -5.248865               | -0.704486 | -0.734518 |
| 8                | 1                | 0              | -3.582297               | 1.089603  | -1.113071 |
| 9                | 1                | 0              | -2.091205               | -3.386148 | 0.409851  |
| 10               | 1                | 0              | -4.492054               | -2.951142 | 0.041345  |
| 11               | 7                | 0              | -0.096650               | -1.615815 | 0.130324  |
| 12               | 6                | 0              | 0.774428                | -0.894329 | -0.664132 |
| 13               | 1                | 0              | 0.595598                | -1.058277 | -1.728582 |
| 14               | 6                | 0              | 0.256320                | -2.115567 | 1.465106  |
| 15               | 1                | 0              | 1.310170                | -2.387235 | 1.482992  |
| 16               | 1                | 0              | 0.053262                | -1.374531 | 2.246682  |
| 17               | 1                | 0              | -0.333052               | -3.008183 | 1.674445  |
| 18               | 6                | 0              | 2.192352                | -0.651672 | -0.321058 |
| 19               | 6                | 0              | 3.168079                | -0.915492 | -1.298553 |
| 20               | 6                | 0              | 2.590652                | -0.091079 | 0.907052  |

|    |   |   |           |           |           |
|----|---|---|-----------|-----------|-----------|
| 21 | 6 | 0 | 4.513791  | -0.662478 | -1.040593 |
| 22 | 1 | 0 | 2.868181  | -1.329512 | -2.256656 |
| 23 | 6 | 0 | 3.935854  | 0.168088  | 1.157046  |
| 24 | 1 | 0 | 1.848672  | 0.160844  | 1.657009  |
| 25 | 6 | 0 | 4.900607  | -0.122183 | 0.187969  |
| 26 | 1 | 0 | 5.258230  | -0.882690 | -1.799068 |
| 27 | 1 | 0 | 4.231036  | 0.603885  | 2.106202  |
| 28 | 1 | 0 | 5.948284  | 0.080581  | 0.387210  |
| 29 | 6 | 0 | -0.914589 | 0.995344  | -0.847586 |
| 30 | 6 | 0 | -1.011655 | 2.179965  | -0.037386 |
| 31 | 1 | 0 | -0.734384 | 1.207461  | -1.904199 |
| 32 | 6 | 0 | -0.515639 | 3.416422  | -0.510656 |
| 33 | 7 | 0 | -0.110329 | 4.437139  | -0.914916 |
| 34 | 6 | 0 | -1.468351 | 2.123720  | 1.299842  |
| 35 | 7 | 0 | -1.843193 | 2.073818  | 2.407390  |
| 36 | 1 | 0 | 0.199391  | 0.376352  | -0.657700 |

0662eab\_Ph\_NMeBn\_CHC\_CN\_CN\_ZWion\_B3lyp631pd\_vacuol\_TS\_HC\_f.log

Standard orientation:

| Center<br>Number | Atomic<br>Number | Atomic<br>Type | Coordinates (Angstroms) |           |           |
|------------------|------------------|----------------|-------------------------|-----------|-----------|
|                  |                  |                | X                       | Y         | Z         |
| 1                | 6                | 0              | -4.328224               | -0.492157 | -0.645737 |
| 2                | 6                | 0              | -3.294966               | 0.397968  | -0.926184 |
| 3                | 6                | 0              | -1.961562               | 0.061692  | -0.664396 |
| 4                | 6                | 0              | -1.689011               | -1.190303 | -0.076359 |
| 5                | 6                | 0              | -2.727021               | -2.083242 | 0.213757  |
| 6                | 6                | 0              | -4.042289               | -1.735006 | -0.073517 |
| 7                | 1                | 0              | -5.353456               | -0.219281 | -0.874771 |
| 8                | 1                | 0              | -3.514489               | 1.372203  | -1.353101 |
| 9                | 1                | 0              | -2.495548               | -3.047945 | 0.653833  |
| 10               | 1                | 0              | -4.843844               | -2.433730 | 0.144705  |
| 11               | 7                | 0              | -0.335912               | -1.501756 | 0.266982  |
| 12               | 6                | 0              | 0.595150                | -1.092132 | -0.660733 |
| 13               | 1                | 0              | 0.371027                | -1.446908 | -1.668370 |
| 14               | 6                | 0              | -0.039652               | -1.697643 | 1.691429  |
| 15               | 1                | 0              | 0.969406                | -2.094782 | 1.799532  |
| 16               | 1                | 0              | -0.143547               | -0.768012 | 2.266258  |
| 17               | 1                | 0              | -0.747570               | -2.426843 | 2.089102  |
| 18               | 6                | 0              | 2.018992                | -0.874141 | -0.369775 |
| 19               | 6                | 0              | 2.975169                | -1.375481 | -1.273369 |
| 20               | 6                | 0              | 2.457038                | -0.096643 | 0.721871  |
| 21               | 6                | 0              | 4.331774                | -1.140213 | -1.073628 |
| 22               | 1                | 0              | 2.646435                | -1.960078 | -2.128255 |
| 23               | 6                | 0              | 3.815924                | 0.141416  | 0.910827  |
| 24               | 1                | 0              | 1.738012                | 0.341751  | 1.405267  |
| 25               | 6                | 0              | 4.756005                | -0.382829 | 0.020981  |
| 26               | 1                | 0              | 5.057896                | -1.543418 | -1.772744 |
| 27               | 1                | 0              | 4.139910                | 0.748565  | 1.750198  |
| 28               | 1                | 0              | 5.813941                | -0.192536 | 0.173387  |
| 29               | 6                | 0              | -0.854363               | 1.046215  | -0.950137 |
| 30               | 6                | 0              | -0.643429               | 2.118992  | -0.007068 |
| 31               | 1                | 0              | -0.837211               | 1.383611  | -1.989577 |
| 32               | 6                | 0              | -0.071330               | 3.343195  | -0.430197 |
| 33               | 7                | 0              | 0.389675                | 4.347824  | -0.809500 |
| 34               | 6                | 0              | -0.798641               | 1.873653  | 1.375343  |
| 35               | 7                | 0              | -0.901054               | 1.590609  | 2.507261  |
| 36               | 1                | 0              | 0.132687                | 0.290621  | -0.947320 |

0663bab\_Ph\_NMeBn\_CHC\_CN\_CN\_ZWion\_B3lyp631pd.log

Standard orientation:

| Center<br>Number | Atomic<br>Number | Atomic<br>Type | Coordinates (Angstroms) |          |           |
|------------------|------------------|----------------|-------------------------|----------|-----------|
|                  |                  |                | X                       | Y        | Z         |
| 1                | 6                | 0              | -3.509045               | 2.395615 | 0.542559  |
| 2                | 6                | 0              | -3.518121               | 1.144053 | -0.071856 |
| 3                | 6                | 0              | -2.340850               | 0.498758 | -0.472952 |
| 4                | 6                | 0              | -1.102499               | 1.151446 | -0.229617 |
| 5                | 6                | 0              | -1.111674               | 2.414989 | 0.375124  |
| 6                | 6                | 0              | -2.295730               | 3.038391 | 0.767196  |

|    |   |   |           |           |           |
|----|---|---|-----------|-----------|-----------|
| 7  | 1 | 0 | -4.444248 | 2.858350  | 0.842636  |
| 8  | 1 | 0 | -4.466865 | 0.642239  | -0.242106 |
| 9  | 1 | 0 | -0.156391 | 2.905065  | 0.534655  |
| 10 | 1 | 0 | -2.264478 | 4.013624  | 1.243341  |
| 11 | 7 | 0 | 0.207917  | 0.653349  | -0.596887 |
| 12 | 6 | 0 | 0.866734  | -0.326628 | 0.211306  |
| 13 | 1 | 0 | 0.477891  | -0.227459 | 1.229634  |
| 14 | 6 | 0 | 0.587379  | 0.776325  | -2.004116 |
| 15 | 1 | 0 | 0.310609  | 1.771532  | -2.361735 |
| 16 | 1 | 0 | 1.670128  | 0.665398  | -2.097505 |
| 17 | 1 | 0 | 0.112675  | 0.030934  | -2.657767 |
| 18 | 6 | 0 | 2.383928  | -0.190921 | 0.229324  |
| 19 | 6 | 0 | 3.233044  | -1.274092 | -0.012046 |
| 20 | 6 | 0 | 2.942310  | 1.052741  | 0.556438  |
| 21 | 6 | 0 | 4.618719  | -1.116249 | 0.070841  |
| 22 | 1 | 0 | 2.805080  | -2.236238 | -0.268033 |
| 23 | 6 | 0 | 4.324000  | 1.209138  | 0.639820  |
| 24 | 1 | 0 | 2.286743  | 1.898607  | 0.739851  |
| 25 | 6 | 0 | 5.168072  | 0.122745  | 0.396319  |
| 26 | 1 | 0 | 5.266999  | -1.965996 | -0.122079 |
| 27 | 1 | 0 | 4.742420  | 2.178493  | 0.894681  |
| 28 | 1 | 0 | 6.245445  | 0.243690  | 0.460257  |
| 29 | 6 | 0 | -2.473100 | -0.878117 | -1.117766 |
| 30 | 6 | 0 | -1.994378 | -2.001442 | -0.175422 |
| 31 | 1 | 0 | -3.516980 | -1.056978 | -1.388249 |
| 32 | 6 | 0 | -2.879888 | -2.689376 | 0.688556  |
| 33 | 7 | 0 | -3.646007 | -3.243202 | 1.371439  |
| 34 | 6 | 0 | -0.666055 | -2.056646 | -0.109077 |
| 35 | 7 | 0 | 0.498865  | -1.755127 | -0.270657 |
| 36 | 1 | 0 | -1.891531 | -0.930764 | -2.042633 |

0663bab\_Ph\_NMeBn\_CHC\_CN\_CN\_ZWion\_B3lyp631pd\_PCMacn.log

Standard orientation:

| Center Number | Atomic Number | Atomic Type | Coordinates (Angstroms) |           |           |
|---------------|---------------|-------------|-------------------------|-----------|-----------|
|               |               |             | X                       | Y         | Z         |
| 1             | 6             | 0           | -2.813802               | 2.743737  | 0.472471  |
| 2             | 6             | 0           | -2.880630               | 1.376633  | 0.201776  |
| 3             | 6             | 0           | -1.751700               | 0.642722  | -0.179469 |
| 4             | 6             | 0           | -0.544423               | 1.356095  | -0.268428 |
| 5             | 6             | 0           | -0.452954               | 2.722286  | 0.005222  |
| 6             | 6             | 0           | -1.598415               | 3.422167  | 0.379470  |
| 7             | 1             | 0           | -3.713204               | 3.278104  | 0.762657  |
| 8             | 1             | 0           | -3.820189               | 0.843632  | 0.301166  |
| 9             | 1             | 0           | 0.503240                | 3.227127  | -0.087328 |
| 10            | 1             | 0           | -1.536964               | 4.484023  | 0.593031  |
| 11            | 7             | 0           | 0.679536                | 0.669043  | -0.673551 |
| 12            | 6             | 0           | 1.622419                | 0.510984  | 0.218774  |
| 13            | 1             | 0           | 1.355005                | 0.898891  | 1.197423  |
| 14            | 6             | 0           | 0.788837                | 0.291915  | -2.097985 |
| 15            | 1             | 0           | 1.721103                | 0.684920  | -2.506622 |
| 16            | 1             | 0           | 0.753247                | -0.793039 | -2.210131 |
| 17            | 1             | 0           | -0.049575               | 0.737842  | -2.627106 |
| 18            | 6             | 0           | 2.941670                | -0.066098 | 0.126348  |
| 19            | 6             | 0           | 3.744968                | 0.130729  | 1.276662  |
| 20            | 6             | 0           | 3.476852                | -0.799691 | -0.959832 |
| 21            | 6             | 0           | 5.042892                | -0.357956 | 1.330469  |
| 22            | 1             | 0           | 3.339671                | 0.677285  | 2.122271  |
| 23            | 6             | 0           | 4.772361                | -1.294880 | -0.890230 |
| 24            | 1             | 0           | 2.891267                | -1.009550 | -1.842025 |
| 25            | 6             | 0           | 5.558767                | -1.070871 | 0.245133  |
| 26            | 1             | 0           | 5.647988                | -0.190986 | 2.214739  |
| 27            | 1             | 0           | 5.171629                | -1.862017 | -1.723950 |
| 28            | 1             | 0           | 6.570953                | -1.460374 | 0.285197  |
| 29            | 6             | 0           | -1.831343               | -0.858059 | -0.473420 |
| 30            | 6             | 0           | -3.020923               | -1.601221 | 0.104921  |
| 31            | 1             | 0           | -1.840097               | -0.993187 | -1.562774 |
| 32            | 6             | 0           | -4.121149               | -1.921585 | -0.693767 |
| 33            | 7             | 0           | -5.038148               | -2.193268 | -1.382865 |
| 34            | 6             | 0           | -3.026074               | -1.977064 | 1.451419  |
| 35            | 7             | 0           | -3.004041               | -2.289598 | 2.587233  |
| 36            | 1             | 0           | -0.899623               | -1.324967 | -0.129480 |

0663bab\_Ph\_NMeBn\_CHC\_CN\_CN\_ZWion\_B3lyp631pd\_PCMdce.log

Standard orientation:

| Center<br>Number | Atomic<br>Number | Atomic<br>Type | Coordinates (Angstroms) |           |           |
|------------------|------------------|----------------|-------------------------|-----------|-----------|
|                  |                  |                | X                       | Y         | Z         |
| 1                | 6                | 0              | -2.834135               | 2.729148  | 0.496030  |
| 2                | 6                | 0              | -2.893673               | 1.366330  | 0.204539  |
| 3                | 6                | 0              | -1.760392               | 0.644484  | -0.187300 |
| 4                | 6                | 0              | -0.557310               | 1.365537  | -0.262633 |
| 5                | 6                | 0              | -0.472445               | 2.727914  | 0.032636  |
| 6                | 6                | 0              | -1.622109               | 3.415679  | 0.415410  |
| 7                | 1                | 0              | -3.736618               | 3.254137  | 0.793577  |
| 8                | 1                | 0              | -3.829508               | 0.825479  | 0.296266  |
| 9                | 1                | 0              | 0.481275                | 3.239415  | -0.049799 |
| 10               | 1                | 0              | -1.566844               | 4.474354  | 0.645979  |
| 11               | 7                | 0              | 0.670994                | 0.689897  | -0.675787 |
| 12               | 6                | 0              | 1.609542                | 0.515390  | 0.217895  |
| 13               | 1                | 0              | 1.335562                | 0.883439  | 1.202472  |
| 14               | 6                | 0              | 0.785851                | 0.338174  | -2.106064 |
| 15               | 1                | 0              | 1.717157                | 0.742493  | -2.506185 |
| 16               | 1                | 0              | 0.755467                | -0.744927 | -2.237127 |
| 17               | 1                | 0              | -0.054192               | 0.788208  | -2.629153 |
| 18               | 6                | 0              | 2.929990                | -0.058764 | 0.121848  |
| 19               | 6                | 0              | 3.725907                | 0.114018  | 1.281088  |
| 20               | 6                | 0              | 3.472380                | -0.769891 | -0.975663 |
| 21               | 6                | 0              | 5.023219                | -0.376339 | 1.333483  |
| 22               | 1                | 0              | 3.315087                | 0.642713  | 2.135462  |
| 23               | 6                | 0              | 4.767228                | -1.266921 | -0.907760 |
| 24               | 1                | 0              | 2.892570                | -0.961492 | -1.865850 |
| 25               | 6                | 0              | 5.546061                | -1.066975 | 0.237215  |
| 26               | 1                | 0              | 5.622309                | -0.228497 | 2.225215  |
| 27               | 1                | 0              | 5.171787                | -1.817297 | -1.750150 |
| 28               | 1                | 0              | 6.557628                | -1.458204 | 0.276171  |
| 29               | 6                | 0              | -1.834270               | -0.851559 | -0.505762 |
| 30               | 6                | 0              | -2.998140               | -1.615426 | 0.095411  |
| 31               | 1                | 0              | -1.875953               | -0.965749 | -1.596921 |
| 32               | 6                | 0              | -4.112348               | -1.943382 | -0.681225 |
| 33               | 7                | 0              | -5.039030               | -2.217869 | -1.355601 |
| 34               | 6                | 0              | -2.957138               | -2.002949 | 1.438419  |
| 35               | 7                | 0              | -2.890196               | -2.321513 | 2.570518  |
| 36               | 1                | 0              | -0.887404               | -1.314491 | -0.199269 |

0663bab\_Ph\_NMeBn\_CHC\_CN\_CN\_ZWion\_B3lyp631pd\_PCMtol.log

Standard orientation:

| Center<br>Number | Atomic<br>Number | Atomic<br>Type | Coordinates (Angstroms) |           |           |
|------------------|------------------|----------------|-------------------------|-----------|-----------|
|                  |                  |                | X                       | Y         | Z         |
| 1                | 6                | 0              | -3.619310               | 2.048398  | 0.781179  |
| 2                | 6                | 0              | -3.388116               | 0.931844  | -0.016113 |
| 3                | 6                | 0              | -2.096344               | 0.573522  | -0.435267 |
| 4                | 6                | 0              | -1.049242               | 1.397795  | 0.001524  |
| 5                | 6                | 0              | -1.259219               | 2.521004  | 0.807651  |
| 6                | 6                | 0              | -2.552582               | 2.848265  | 1.201557  |
| 7                | 1                | 0              | -4.633163               | 2.293480  | 1.082010  |
| 8                | 1                | 0              | -4.218877               | 0.300228  | -0.316224 |
| 9                | 1                | 0              | -0.412429               | 3.123292  | 1.122598  |
| 10               | 1                | 0              | -2.724214               | 3.713756  | 1.832916  |
| 11               | 7                | 0              | 0.328683                | 1.138315  | -0.418294 |
| 12               | 6                | 0              | 1.096928                | 0.389678  | 0.328895  |
| 13               | 1                | 0              | 0.578891                | -0.114376 | 1.141814  |
| 14               | 6                | 0              | 0.734749                | 1.782105  | -1.681028 |
| 15               | 1                | 0              | 1.026667                | 2.820022  | -1.499841 |
| 16               | 1                | 0              | 1.559084                | 1.232981  | -2.133594 |
| 17               | 1                | 0              | -0.127570               | 1.772942  | -2.346860 |
| 18               | 6                | 0              | 2.508660                | 0.099544  | 0.182657  |
| 19               | 6                | 0              | 2.935886                | -1.135451 | 0.722609  |
| 20               | 6                | 0              | 3.460304                | 0.976269  | -0.385808 |
| 21               | 6                | 0              | 4.275946                | -1.499977 | 0.646792  |
| 22               | 1                | 0              | 2.193936                | -1.803409 | 1.152984  |
| 23               | 6                | 0              | 4.799765                | 0.610769  | -0.427365 |

|    |   |   |           |           |           |
|----|---|---|-----------|-----------|-----------|
| 24 | 1 | 0 | 3.170158  | 1.955823  | -0.744920 |
| 25 | 6 | 0 | 5.207240  | -0.630171 | 0.075373  |
| 26 | 1 | 0 | 4.594770  | -2.458729 | 1.041923  |
| 27 | 1 | 0 | 5.530458  | 1.294563  | -0.846548 |
| 28 | 1 | 0 | 6.254912  | -0.911261 | 0.030421  |
| 29 | 6 | 0 | -1.889103 | -0.695952 | -1.251633 |
| 30 | 6 | 0 | -1.994682 | -1.959932 | -0.404603 |
| 31 | 1 | 0 | -2.653410 | -0.734000 | -2.033948 |
| 32 | 6 | 0 | -3.200380 | -2.670056 | -0.352799 |
| 33 | 7 | 0 | -4.224649 | -3.247365 | -0.346055 |
| 34 | 6 | 0 | -0.948003 | -2.259586 | 0.460274  |
| 35 | 7 | 0 | -0.011507 | -2.433192 | 1.158777  |
| 36 | 1 | 0 | -0.921879 | -0.658019 | -1.767090 |

0663bab\_Ph\_NMeBn\_CHC\_CN\_CN\_ZWion\_B3lyp631pd\_PCMw.log

Standard orientation:

| Center Number | Atomic Number | Atomic Type | Coordinates (Angstroms) |           |           |
|---------------|---------------|-------------|-------------------------|-----------|-----------|
|               |               |             | X                       | Y         | Z         |
| 1             | 6             | 0           | -2.808754               | 2.747659  | 0.464562  |
| 2             | 6             | 0           | -2.877602               | 1.379465  | 0.199546  |
| 3             | 6             | 0           | -1.749764               | 0.642185  | -0.178319 |
| 4             | 6             | 0           | -0.541288               | 1.353311  | -0.270547 |
| 5             | 6             | 0           | -0.447963               | 2.720474  | -0.002655 |
| 6             | 6             | 0           | -1.592325               | 3.423729  | 0.368790  |
| 7             | 1             | 0           | -3.707371               | 3.284666  | 0.752319  |
| 8             | 1             | 0           | -3.818248               | 0.848712  | 0.300683  |
| 9             | 1             | 0           | 0.508984                | 3.223376  | -0.097577 |
| 10            | 1             | 0           | -1.529157               | 4.486381  | 0.577799  |
| 11            | 7             | 0           | 0.681499                | 0.663079  | -0.673211 |
| 12            | 6             | 0           | 1.625731                | 0.510111  | 0.218613  |
| 13            | 1             | 0           | 1.360070                | 0.903703  | 1.195441  |
| 14            | 6             | 0           | 0.789152                | 0.278367  | -2.095811 |
| 15            | 1             | 0           | 1.721205                | 0.668828  | -2.507234 |
| 16            | 1             | 0           | 0.753050                | -0.807123 | -2.202170 |
| 17            | 1             | 0           | -0.049378               | 0.722112  | -2.626558 |
| 18            | 6             | 0           | 2.944737                | -0.067660 | 0.127419  |
| 19            | 6             | 0           | 3.749709                | 0.135496  | 1.275470  |
| 20            | 6             | 0           | 3.478285                | -0.807212 | -0.955514 |
| 21            | 6             | 0           | 5.047710                | -0.352929 | 1.330051  |
| 22            | 1             | 0           | 3.345701                | 0.686846  | 2.118549  |
| 23            | 6             | 0           | 4.773902                | -1.302039 | -0.885093 |
| 24            | 1             | 0           | 2.891413                | -1.021831 | -1.835685 |
| 25            | 6             | 0           | 5.561986                | -1.071800 | 0.247871  |
| 26            | 1             | 0           | 5.654137                | -0.180986 | 2.212456  |
| 27            | 1             | 0           | 5.171963                | -1.873636 | -1.716334 |
| 28            | 1             | 0           | 6.574263                | -1.461005 | 0.288547  |
| 29            | 6             | 0           | -1.830994               | -0.859813 | -0.465345 |
| 30            | 6             | 0           | -3.026612               | -1.597449 | 0.108145  |
| 31            | 1             | 0           | -1.832281               | -1.000844 | -1.553928 |
| 32            | 6             | 0           | -4.122756               | -1.918256 | -0.695773 |
| 33            | 7             | 0           | -5.036886               | -2.191112 | -1.388342 |
| 34            | 6             | 0           | -3.043580               | -1.967636 | 1.456009  |
| 35            | 7             | 0           | -3.033011               | -2.275949 | 2.593210  |
| 36            | 1             | 0           | -0.903001               | -1.327355 | -0.112417 |

0663bac\_Ph\_NMeBn\_CHC\_CN\_CN\_ZWion\_B3lyp631pd.log

Standard orientation:

| Center Number | Atomic Number | Atomic Type | Coordinates (Angstroms) |           |           |
|---------------|---------------|-------------|-------------------------|-----------|-----------|
|               |               |             | X                       | Y         | Z         |
| 1             | 6             | 0           | -3.507188               | -2.391821 | -0.591589 |
| 2             | 6             | 0           | -3.528083               | -1.146343 | 0.035113  |
| 3             | 6             | 0           | -2.357191               | -0.501165 | 0.454143  |
| 4             | 6             | 0           | -1.118025               | -1.149189 | 0.215187  |
| 5             | 6             | 0           | -1.111302               | -2.406722 | -0.400144 |
| 6             | 6             | 0           | -2.289758               | -3.029354 | -0.810198 |
| 7             | 1             | 0           | -4.437344               | -2.854744 | -0.906627 |
| 8             | 1             | 0           | -4.480004               | -0.649064 | 0.199920  |
| 9             | 1             | 0           | -0.153236               | -2.892396 | -0.557628 |

|    |   |   |           |           |           |
|----|---|---|-----------|-----------|-----------|
| 10 | 1 | 0 | -2.250975 | -3.999403 | -1.296100 |
| 11 | 7 | 0 | 0.180476  | -0.631747 | 0.598332  |
| 12 | 6 | 0 | 0.858622  | 0.286821  | -0.222458 |
| 13 | 1 | 0 | 0.484815  | 0.117134  | -1.267565 |
| 14 | 6 | 0 | 0.566132  | -0.784195 | 2.002134  |
| 15 | 1 | 0 | 0.313755  | -1.794211 | 2.335352  |
| 16 | 1 | 0 | 1.644177  | -0.644227 | 2.099443  |
| 17 | 1 | 0 | 0.068017  | -0.064775 | 2.664627  |
| 18 | 6 | 0 | 2.376186  | 0.170854  | -0.221460 |
| 19 | 6 | 0 | 3.219619  | 1.282011  | -0.131838 |
| 20 | 6 | 0 | 2.943954  | -1.098632 | -0.408450 |
| 21 | 6 | 0 | 4.604286  | 1.126218  | -0.225442 |
| 22 | 1 | 0 | 2.787819  | 2.263310  | 0.020663  |
| 23 | 6 | 0 | 4.325859  | -1.252784 | -0.499134 |
| 24 | 1 | 0 | 2.296236  | -1.967224 | -0.478641 |
| 25 | 6 | 0 | 5.162175  | -0.138266 | -0.408163 |
| 26 | 1 | 0 | 5.246210  | 1.999045  | -0.150789 |
| 27 | 1 | 0 | 4.748817  | -2.243053 | -0.641084 |
| 28 | 1 | 0 | 6.239430  | -0.256466 | -0.478252 |
| 29 | 6 | 0 | -2.489065 | 0.866190  | 1.118421  |
| 30 | 6 | 0 | -1.980316 | 2.005606  | 0.218409  |
| 31 | 1 | 0 | -3.537413 | 1.046281  | 1.370578  |
| 32 | 6 | 0 | -2.841101 | 2.689267  | -0.673504 |
| 33 | 7 | 0 | -3.587815 | 3.237861  | -1.382384 |
| 34 | 6 | 0 | -0.648546 | 2.103196  | 0.200950  |
| 35 | 7 | 0 | 0.527538  | 1.859387  | 0.372098  |
| 36 | 1 | 0 | -1.929254 | 0.891141  | 2.057922  |

0701aaa\_Ph\_NMeBn\_CHC\_CN\_Me\_B3lyp631pd\_PCMDmsol.log

Standard orientation:

| Center<br>Number | Atomic<br>Number | Atomic<br>Type | Coordinates (Angstroms) |           |           |
|------------------|------------------|----------------|-------------------------|-----------|-----------|
|                  |                  |                | X                       | Y         | Z         |
| 1                | 6                | 0              | 4.329604                | -0.637985 | 0.035337  |
| 2                | 6                | 0              | 3.394212                | 0.388442  | -0.057547 |
| 3                | 6                | 0              | 2.015910                | 0.125437  | -0.160085 |
| 4                | 6                | 0              | 1.569242                | -1.229757 | -0.150854 |
| 5                | 6                | 0              | 2.529043                | -2.252600 | -0.068170 |
| 6                | 6                | 0              | 3.889429                | -1.961788 | 0.022165  |
| 7                | 1                | 0              | 5.388137                | -0.406681 | 0.094915  |
| 8                | 1                | 0              | 3.737720                | 1.415165  | -0.113599 |
| 9                | 1                | 0              | 2.212832                | -3.288378 | -0.055834 |
| 10               | 1                | 0              | 4.603997                | -2.776842 | 0.090290  |
| 11               | 7                | 0              | 0.186844                | -1.516877 | -0.258598 |
| 12               | 6                | 0              | -0.673283               | -1.036879 | 0.835981  |
| 13               | 1                | 0              | -0.224724               | -0.130696 | 1.251511  |
| 14               | 1                | 0              | -0.687141               | -1.774799 | 1.655661  |
| 15               | 6                | 0              | -0.171991               | -2.870016 | -0.681225 |
| 16               | 1                | 0              | -1.232259               | -2.884503 | -0.941363 |
| 17               | 1                | 0              | 0.401907                | -3.151154 | -1.566515 |
| 18               | 1                | 0              | -0.007715               | -3.625291 | 0.103841  |
| 19               | 6                | 0              | -2.104947               | -0.730315 | 0.425722  |
| 20               | 6                | 0              | -3.114246               | -0.771956 | 1.397557  |
| 21               | 6                | 0              | -2.446930               | -0.357958 | -0.880131 |
| 22               | 6                | 0              | -4.429831               | -0.434327 | 1.077941  |
| 23               | 1                | 0              | -2.866653               | -1.070666 | 2.413448  |
| 24               | 6                | 0              | -3.764806               | -0.027003 | -1.204952 |
| 25               | 1                | 0              | -1.678701               | -0.345126 | -1.646778 |
| 26               | 6                | 0              | -4.760284               | -0.059818 | -0.226966 |
| 27               | 1                | 0              | -5.197519               | -0.471253 | 1.845512  |
| 28               | 1                | 0              | -4.012155               | 0.254953  | -2.224439 |
| 29               | 1                | 0              | -5.784725               | 0.197316  | -0.479472 |
| 30               | 6                | 0              | 1.055234                | 1.199952  | -0.415621 |
| 31               | 6                | 0              | 1.059725                | 2.470654  | 0.062438  |
| 32               | 1                | 0              | 0.237314                | 0.923603  | -1.076675 |
| 33               | 6                | 0              | 0.040083                | 3.353226  | -0.425801 |
| 34               | 7                | 0              | -0.774989               | 4.096899  | -0.802493 |
| 35               | 6                | 0              | 2.001460                | 3.065952  | 1.085605  |
| 36               | 1                | 0              | 2.496900                | 2.281347  | 1.659479  |
| 37               | 1                | 0              | 2.772687                | 3.683666  | 0.611290  |
| 38               | 1                | 0              | 1.451381                | 3.709630  | 1.777995  |



Standard orientation:

| Center<br>Number | Atomic<br>Number | Atomic<br>Type | Coordinates (Angstroms) |           |           |
|------------------|------------------|----------------|-------------------------|-----------|-----------|
|                  |                  |                | X                       | Y         | Z         |
| 1                | 6                | 0              | 4.200544                | -0.968003 | 0.145098  |
| 2                | 6                | 0              | 3.321943                | 0.091506  | -0.088378 |
| 3                | 6                | 0              | 1.939030                | -0.104125 | -0.149472 |
| 4                | 6                | 0              | 1.454660                | -1.417120 | 0.011911  |
| 5                | 6                | 0              | 2.326658                | -2.484756 | 0.243435  |
| 6                | 6                | 0              | 3.701277                | -2.261043 | 0.308164  |
| 7                | 1                | 0              | 5.268505                | -0.782049 | 0.204204  |
| 8                | 1                | 0              | 3.699857                | 1.100216  | -0.232817 |
| 9                | 1                | 0              | 1.925832                | -3.484349 | 0.379004  |
| 10               | 1                | 0              | 4.374236                | -3.092068 | 0.494018  |
| 11               | 7                | 0              | 0.040001                | -1.658107 | -0.099667 |
| 12               | 6                | 0              | -0.751966               | -0.727911 | 0.506623  |
| 13               | 1                | 0              | -0.375500               | -0.428399 | 1.482821  |
| 14               | 6                | 0              | -0.406255               | -2.531823 | -1.188177 |
| 15               | 1                | 0              | -1.427637               | -2.860628 | -0.998678 |
| 16               | 1                | 0              | -0.355470               | -2.037068 | -2.165612 |
| 17               | 1                | 0              | 0.242095                | -3.407641 | -1.215566 |
| 18               | 6                | 0              | -2.179165               | -0.510617 | 0.299320  |
| 19               | 6                | 0              | -2.938691               | -0.126143 | 1.427160  |
| 20               | 6                | 0              | -2.832740               | -0.586219 | -0.951223 |
| 21               | 6                | 0              | -4.299968               | 0.137783  | 1.317898  |
| 22               | 1                | 0              | -2.449873               | -0.046990 | 2.393834  |
| 23               | 6                | 0              | -4.193797               | -0.316219 | -1.053731 |
| 24               | 1                | 0              | -2.274983               | -0.823503 | -1.848545 |
| 25               | 6                | 0              | -4.935573               | 0.039546  | 0.077114  |
| 26               | 1                | 0              | -4.865290               | 0.421233  | 2.200178  |
| 27               | 1                | 0              | -4.677041               | -0.374558 | -2.024041 |
| 28               | 1                | 0              | -5.997221               | 0.247788  | -0.010842 |
| 29               | 6                | 0              | 1.009152                | 1.055578  | -0.489697 |
| 30               | 6                | 0              | 1.306712                | 2.376585  | 0.045615  |
| 31               | 1                | 0              | 0.840869                | 1.093070  | -1.573510 |
| 32               | 6                | 0              | 0.945164                | 3.492074  | -0.712395 |
| 33               | 7                | 0              | 0.676991                | 4.443475  | -1.355659 |
| 34               | 1                | 0              | -0.044352               | 0.670520  | -0.092961 |
| 35               | 6                | 0              | 1.647570                | 2.577881  | 1.502685  |
| 36               | 1                | 0              | 2.357098                | 1.819462  | 1.851189  |
| 37               | 1                | 0              | 2.091041                | 3.562476  | 1.678563  |
| 38               | 1                | 0              | 0.761558                | 2.503073  | 2.154353  |

Standard orientation:

| Center<br>Number | Atomic<br>Number | Atomic<br>Type | Coordinates (Angstroms) |           |           |
|------------------|------------------|----------------|-------------------------|-----------|-----------|
|                  |                  |                | X                       | Y         | Z         |
| 1                | 6                | 0              | -2.939823               | 2.715835  | 0.463468  |
| 2                | 6                | 0              | -3.041524               | 1.352880  | 0.184196  |
| 3                | 6                | 0              | -1.927187               | 0.588368  | -0.181102 |
| 4                | 6                | 0              | -0.695111               | 1.259683  | -0.248620 |
| 5                | 6                | 0              | -0.574063               | 2.624293  | 0.028898  |
| 6                | 6                | 0              | -1.703013               | 3.358284  | 0.388232  |
| 7                | 1                | 0              | -3.826085               | 3.275452  | 0.747732  |
| 8                | 1                | 0              | -3.994475               | 0.839349  | 0.266791  |
| 9                | 1                | 0              | 0.398372                | 3.100881  | -0.048258 |
| 10               | 1                | 0              | -1.612623               | 4.417324  | 0.607029  |
| 11               | 7                | 0              | 0.515486                | 0.544093  | -0.628020 |
| 12               | 6                | 0              | 1.473600                | 0.426990  | 0.272269  |
| 13               | 1                | 0              | 1.158139                | 0.717827  | 1.269630  |
| 14               | 6                | 0              | 0.647436                | 0.182330  | -2.050715 |
| 15               | 1                | 0              | 1.210184                | 0.954936  | -2.582473 |
| 16               | 1                | 0              | 1.144284                | -0.782502 | -2.147492 |
| 17               | 1                | 0              | -0.349570               | 0.120323  | -2.479702 |
| 18               | 6                | 0              | 2.825283                | -0.055872 | 0.164100  |
| 19               | 6                | 0              | 3.463689                | -0.321910 | 1.403457  |
| 20               | 6                | 0              | 3.566456                | -0.256294 | -1.028026 |
| 21               | 6                | 0              | 4.765881                | -0.798109 | 1.450504  |
| 22               | 1                | 0              | 2.916663                | -0.157553 | 2.326636  |

|    |   |   |           |           |           |
|----|---|---|-----------|-----------|-----------|
| 23 | 6 | 0 | 4.873868  | -0.721894 | -0.967825 |
| 24 | 1 | 0 | 3.146540  | -0.022288 | -1.995249 |
| 25 | 6 | 0 | 5.476098  | -1.003351 | 0.263262  |
| 26 | 1 | 0 | 5.230665  | -1.004265 | 2.408873  |
| 27 | 1 | 0 | 5.430729  | -0.861918 | -1.888425 |
| 28 | 1 | 0 | 6.496717  | -1.370732 | 0.296376  |
| 29 | 6 | 0 | -2.058074 | -0.903707 | -0.498468 |
| 30 | 6 | 0 | -3.063106 | -1.660530 | 0.322845  |
| 31 | 1 | 0 | -2.318460 | -0.997115 | -1.561895 |
| 32 | 6 | 0 | -4.072698 | -2.361125 | -0.300089 |
| 33 | 7 | 0 | -4.954244 | -2.955343 | -0.834600 |
| 34 | 1 | 0 | -1.042010 | -1.333906 | -0.407205 |
| 35 | 6 | 0 | -2.804702 | -1.827116 | 1.799915  |
| 36 | 1 | 0 | -2.684261 | -0.859464 | 2.313535  |
| 37 | 1 | 0 | -3.628182 | -2.352044 | 2.295144  |
| 38 | 1 | 0 | -1.883375 | -2.398072 | 2.019469  |

0711aaa\_Ph\_NMeBn\_CHC\_CN\_Me\_product\_B3lyp631pd\_PCMdmsol.log

Standard orientation:

| Center<br>Number | Atomic<br>Number | Atomic<br>Type | Coordinates (Angstroms) |           |           |
|------------------|------------------|----------------|-------------------------|-----------|-----------|
|                  |                  |                | X                       | Y         | Z         |
| 1                | 6                | 0              | 4.644739                | -0.154952 | 0.265578  |
| 2                | 6                | 0              | 3.728527                | 0.889054  | 0.133687  |
| 3                | 6                | 0              | 2.375532                | 0.651031  | -0.113923 |
| 4                | 6                | 0              | 1.899894                | -0.678235 | -0.203178 |
| 5                | 6                | 0              | 2.832606                | -1.729183 | -0.069596 |
| 6                | 6                | 0              | 4.182071                | -1.466581 | 0.157961  |
| 7                | 1                | 0              | 5.694100                | 0.052804  | 0.448567  |
| 8                | 1                | 0              | 4.066885                | 1.919787  | 0.208871  |
| 9                | 1                | 0              | 2.502507                | -2.758797 | -0.130458 |
| 10               | 1                | 0              | 4.871444                | -2.300390 | 0.256984  |
| 11               | 7                | 0              | 0.539609                | -0.959725 | -0.392924 |
| 12               | 6                | 0              | -0.439654               | 0.117613  | -0.595828 |
| 13               | 1                | 0              | -0.466141               | 0.409373  | -1.658332 |
| 14               | 6                | 0              | 0.218917                | -2.235205 | -1.042708 |
| 15               | 1                | 0              | -0.811414               | -2.217344 | -1.392919 |
| 16               | 1                | 0              | 0.874414                | -2.418908 | -1.903460 |
| 17               | 1                | 0              | 0.315074                | -3.077224 | -0.349184 |
| 18               | 6                | 0              | -1.851122               | -0.326592 | -0.218115 |
| 19               | 6                | 0              | -2.934226               | 0.078058  | -1.008969 |
| 20               | 6                | 0              | -2.102661               | -1.116905 | 0.913386  |
| 21               | 6                | 0              | -4.240891               | -0.279384 | -0.669424 |
| 22               | 1                | 0              | -2.754729               | 0.674806  | -1.899027 |
| 23               | 6                | 0              | -3.406784               | -1.478158 | 1.252063  |
| 24               | 1                | 0              | -1.270452               | -1.462335 | 1.517939  |
| 25               | 6                | 0              | -4.481174               | -1.057290 | 0.463953  |
| 26               | 1                | 0              | -5.067107               | 0.043273  | -1.295909 |
| 27               | 1                | 0              | -3.583342               | -2.092447 | 2.130111  |
| 28               | 1                | 0              | -5.495677               | -1.341614 | 0.726841  |
| 29               | 6                | 0              | 1.418109                | 1.797937  | -0.316556 |
| 30               | 6                | 0              | 0.003316                | 1.413338  | 0.185221  |
| 31               | 1                | 0              | 1.767785                | 2.689573  | 0.212504  |
| 32               | 1                | 0              | 1.357342                | 2.064558  | -1.379227 |
| 33               | 6                | 0              | -0.917391               | 2.505853  | -0.174219 |
| 34               | 7                | 0              | -1.613836               | 3.394061  | -0.448832 |
| 35               | 6                | 0              | -0.008348               | 1.255061  | 1.722803  |
| 36               | 1                | 0              | 0.347952                | 2.176948  | 2.189882  |
| 37               | 1                | 0              | -1.011495               | 1.044409  | 2.095364  |
| 38               | 1                | 0              | 0.653664                | 0.440416  | 2.020929  |

0801aaa\_Ph\_NMeBn\_CHC\_Me\_Me\_B3lyp631pd\_PCMdmsol.log

Standard orientation:

| Center<br>Number | Atomic<br>Number | Atomic<br>Type | Coordinates (Angstroms) |           |           |
|------------------|------------------|----------------|-------------------------|-----------|-----------|
|                  |                  |                | X                       | Y         | Z         |
| 1                | 6                | 0              | 4.273483                | -0.761923 | 0.048908  |
| 2                | 6                | 0              | 3.412569                | 0.319885  | -0.135815 |
| 3                | 6                | 0              | 2.020428                | 0.159794  | -0.232950 |
| 4                | 6                | 0              | 1.483065                | -1.157678 | -0.139764 |

|    |   |   |           |           |           |
|----|---|---|-----------|-----------|-----------|
| 5  | 6 | 0 | 2.362487  | -2.239192 | 0.034347  |
| 6  | 6 | 0 | 3.741756  | -2.047323 | 0.126364  |
| 7  | 1 | 0 | 5.345706  | -0.600948 | 0.107085  |
| 8  | 1 | 0 | 3.828559  | 1.314499  | -0.258087 |
| 9  | 1 | 0 | 1.968816  | -3.245619 | 0.112770  |
| 10 | 1 | 0 | 4.393006  | -2.906030 | 0.262727  |
| 11 | 7 | 0 | 0.079309  | -1.358468 | -0.262420 |
| 12 | 6 | 0 | -0.742932 | -0.769909 | 0.806888  |
| 13 | 1 | 0 | -0.266163 | 0.162119  | 1.121528  |
| 14 | 1 | 0 | -0.754574 | -1.431201 | 1.690632  |
| 15 | 6 | 0 | -0.357899 | -2.709770 | -0.603643 |
| 16 | 1 | 0 | -1.413790 | -2.677401 | -0.880868 |
| 17 | 1 | 0 | 0.209898  | -3.082514 | -1.459016 |
| 18 | 1 | 0 | -0.252302 | -3.426240 | 0.228103  |
| 19 | 6 | 0 | -2.175481 | -0.467165 | 0.399723  |
| 20 | 6 | 0 | -3.193239 | -0.528848 | 1.360859  |
| 21 | 6 | 0 | -2.507675 | -0.070776 | -0.902531 |
| 22 | 6 | 0 | -4.507872 | -0.189190 | 1.035863  |
| 23 | 1 | 0 | -2.953572 | -0.845619 | 2.373182  |
| 24 | 6 | 0 | -3.822952 | 0.261818  | -1.233072 |
| 25 | 1 | 0 | -1.730458 | -0.041157 | -1.659380 |
| 26 | 6 | 0 | -4.827770 | 0.207935  | -0.264375 |
| 27 | 1 | 0 | -5.282317 | -0.242963 | 1.795729  |
| 28 | 1 | 0 | -4.062697 | 0.562399  | -2.249204 |
| 29 | 1 | 0 | -5.850757 | 0.466532  | -0.521595 |
| 30 | 6 | 0 | 1.142565  | 1.303185  | -0.547717 |
| 31 | 6 | 0 | 1.181070  | 2.562257  | -0.065458 |
| 32 | 1 | 0 | 0.359447  | 1.073133  | -1.269020 |
| 33 | 6 | 0 | 2.108770  | 3.046879  | 1.021068  |
| 34 | 1 | 0 | 2.618189  | 2.231083  | 1.536620  |
| 35 | 1 | 0 | 2.874480  | 3.723113  | 0.617812  |
| 36 | 1 | 0 | 1.546147  | 3.627550  | 1.762547  |
| 37 | 6 | 0 | 0.228536  | 3.607570  | -0.592680 |
| 38 | 1 | 0 | -0.432462 | 3.208415  | -1.366563 |
| 39 | 1 | 0 | -0.392289 | 4.017484  | 0.214667  |
| 40 | 1 | 0 | 0.778519  | 4.457352  | -1.018813 |

0803aab\_Ph\_NMeBn\_CHC\_Me\_Me\_ZWion\_B3lyp631pd\_PCMdms0.log

Standard orientation:

| Center Number | Atomic Number | Atomic Type | Coordinates (Angstroms) |           |           |
|---------------|---------------|-------------|-------------------------|-----------|-----------|
|               |               |             | X                       | Y         | Z         |
| 1             | 6             | 0           | 3.249020                | 2.503268  | -0.415119 |
| 2             | 6             | 0           | 3.349761                | 1.154797  | -0.068888 |
| 3             | 6             | 0           | 2.214685                | 0.407772  | 0.266368  |
| 4             | 6             | 0           | 0.970400                | 1.055501  | 0.263289  |
| 5             | 6             | 0           | 0.861355                | 2.405959  | -0.081061 |
| 6             | 6             | 0           | 2.002061                | 3.132678  | -0.422322 |
| 7             | 1             | 0           | 4.141492                | 3.060168  | -0.685505 |
| 8             | 1             | 0           | 4.314666                | 0.656359  | -0.077084 |
| 9             | 1             | 0           | -0.118212               | 2.875159  | -0.075301 |
| 10            | 1             | 0           | 1.916039                | 4.181563  | -0.689729 |
| 11            | 7             | 0           | -0.214231               | 0.307831  | 0.630190  |
| 12            | 6             | 0           | -1.224375               | 0.289058  | -0.295455 |
| 13            | 1             | 0           | -0.854527               | 0.454100  | -1.301526 |
| 14            | 6             | 0           | -0.454926               | 0.196067  | 2.075400  |
| 15            | 1             | 0           | -1.031519               | 1.050674  | 2.452137  |
| 16            | 1             | 0           | -0.986051               | -0.729540 | 2.298120  |
| 17            | 1             | 0           | 0.506880                | 0.176013  | 2.586406  |
| 18            | 6             | 0           | -2.608571               | -0.013954 | -0.187240 |
| 19            | 6             | 0           | -3.320475               | -0.117929 | -1.427538 |
| 20            | 6             | 0           | -3.385371               | -0.209971 | 0.998140  |
| 21            | 6             | 0           | -4.674740               | -0.397976 | -1.478222 |
| 22            | 1             | 0           | -2.770429               | 0.026465  | -2.353892 |
| 23            | 6             | 0           | -4.744163               | -0.492545 | 0.928278  |
| 24            | 1             | 0           | -2.935413               | -0.123148 | 1.976582  |
| 25            | 6             | 0           | -5.409958               | -0.594719 | -0.298793 |
| 26            | 1             | 0           | -5.167709               | -0.467746 | -2.444301 |
| 27            | 1             | 0           | -5.296548               | -0.631611 | 1.854084  |
| 28            | 1             | 0           | -6.471489               | -0.816858 | -0.336942 |
| 29            | 6             | 0           | 2.278077                | -1.057297 | 0.665704  |
| 30            | 6             | 0           | 3.075741                | -1.958348 | -0.188944 |
| 31            | 1             | 0           | 2.616540                | -1.144530 | 1.709471  |

|    |   |   |          |           |           |
|----|---|---|----------|-----------|-----------|
| 32 | 1 | 0 | 1.186780 | -1.346840 | 0.704480  |
| 33 | 6 | 0 | 2.890753 | -1.939272 | -1.669855 |
| 34 | 1 | 0 | 2.660231 | -0.936148 | -2.045968 |
| 35 | 1 | 0 | 3.782361 | -2.309389 | -2.194284 |
| 36 | 1 | 0 | 2.058915 | -2.594194 | -2.003039 |
| 37 | 6 | 0 | 3.672129 | -3.185138 | 0.416425  |
| 38 | 1 | 0 | 2.978834 | -4.052213 | 0.413265  |
| 39 | 1 | 0 | 4.557465 | -3.521474 | -0.141596 |
| 40 | 1 | 0 | 3.962899 | -3.029332 | 1.462299  |

0811aaa\_Ph\_NMeBn\_CHC\_Me\_Me\_product\_B3lyp631pd\_PCMdmsol.log

Standard orientation:

| Center<br>Number | Atomic<br>Number | Atomic<br>Type | Coordinates (Angstroms) |           |           |
|------------------|------------------|----------------|-------------------------|-----------|-----------|
|                  |                  |                | X                       | Y         | Z         |
| 1                | 6                | 0              | 4.565611                | -0.261728 | 0.320931  |
| 2                | 6                | 0              | 3.708671                | 0.824209  | 0.125090  |
| 3                | 6                | 0              | 2.350927                | 0.652247  | -0.145179 |
| 4                | 6                | 0              | 1.807592                | -0.654532 | -0.194846 |
| 5                | 6                | 0              | 2.678333                | -1.748721 | 0.001529  |
| 6                | 6                | 0              | 4.035608                | -1.549952 | 0.252408  |
| 7                | 1                | 0              | 5.620547                | -0.102953 | 0.521851  |
| 8                | 1                | 0              | 4.101948                | 1.837731  | 0.167392  |
| 9                | 1                | 0              | 2.292461                | -2.760794 | -0.026976 |
| 10               | 1                | 0              | 4.676600                | -2.414869 | 0.400828  |
| 11               | 7                | 0              | 0.444826                | -0.863423 | -0.420973 |
| 12               | 6                | 0              | -0.487303               | 0.262274  | -0.631353 |
| 13               | 1                | 0              | -0.524727               | 0.504445  | -1.707245 |
| 14               | 6                | 0              | 0.064074                | -2.138212 | -1.031246 |
| 15               | 1                | 0              | -0.936136               | -2.055460 | -1.454319 |
| 16               | 1                | 0              | 0.756597                | -2.415939 | -1.836304 |
| 17               | 1                | 0              | 0.044050                | -2.956286 | -0.301392 |
| 18               | 6                | 0              | -1.906368               | -0.134879 | -0.225397 |
| 19               | 6                | 0              | -2.991374               | 0.239320  | -1.029711 |
| 20               | 6                | 0              | -2.166752               | -0.864865 | 0.944333  |
| 21               | 6                | 0              | -4.301659               | -0.082550 | -0.667708 |
| 22               | 1                | 0              | -2.808917               | 0.784327  | -1.952201 |
| 23               | 6                | 0              | -3.473607               | -1.191898 | 1.307479  |
| 24               | 1                | 0              | -1.336250               | -1.190068 | 1.562302  |
| 25               | 6                | 0              | -4.547692               | -0.798241 | 0.504887  |
| 26               | 1                | 0              | -5.126474               | 0.218160  | -1.307302 |
| 27               | 1                | 0              | -3.653064               | -1.758953 | 2.216520  |
| 28               | 1                | 0              | -5.564504               | -1.055802 | 0.786314  |
| 29               | 6                | 0              | 1.445088                | 1.826372  | -0.414512 |
| 30               | 6                | 0              | 0.004989                | 1.573008  | 0.075634  |
| 31               | 1                | 0              | 1.843481                | 2.728706  | 0.063720  |
| 32               | 1                | 0              | 1.417765                | 2.037836  | -1.493648 |
| 33               | 6                | 0              | -0.010368               | 1.469705  | 1.612565  |
| 34               | 1                | 0              | 0.405401                | 2.386780  | 2.044148  |
| 35               | 1                | 0              | -1.027302               | 1.353408  | 1.995397  |
| 36               | 1                | 0              | 0.587501                | 0.629648  | 1.975611  |
| 37               | 6                | 0              | -0.876239               | 2.757378  | -0.357258 |
| 38               | 1                | 0              | -0.895664               | 2.865721  | -1.447526 |
| 39               | 1                | 0              | -1.906658               | 2.647519  | -0.008774 |
| 40               | 1                | 0              | -0.477629               | 3.687185  | 0.062541  |

0901aaa\_Ph\_NMeBn\_CHC\_COOMe\_COOMe\_B3lyp631pd\_PCMdmsol.log

Standard orientation:

| Center<br>Number | Atomic<br>Number | Atomic<br>Type | Coordinates (Angstroms) |          |           |
|------------------|------------------|----------------|-------------------------|----------|-----------|
|                  |                  |                | X                       | Y        | Z         |
| 1                | 6                | 0              | -3.136150               | 2.913320 | -0.489838 |
| 2                | 6                | 0              | -2.651906               | 1.610165 | -0.499531 |
| 3                | 6                | 0              | -1.273229               | 1.337436 | -0.434346 |
| 4                | 6                | 0              | -0.353695               | 2.420901 | -0.325588 |
| 5                | 6                | 0              | -0.860444               | 3.732275 | -0.334234 |
| 6                | 6                | 0              | -2.230226               | 3.973832 | -0.417535 |
| 7                | 1                | 0              | -4.202441               | 3.100222 | -0.562753 |
| 8                | 1                | 0              | -3.343839               | 0.783815 | -0.625569 |
| 9                | 1                | 0              | -0.183373               | 4.573550 | -0.252828 |

|    |   |   |           |           |           |
|----|---|---|-----------|-----------|-----------|
| 10 | 1 | 0 | -2.589370 | 4.998776  | -0.415344 |
| 11 | 7 | 0 | 1.031492  | 2.157599  | -0.236005 |
| 12 | 6 | 0 | 1.487315  | 1.377758  | 0.927363  |
| 13 | 1 | 0 | 0.663778  | 0.739485  | 1.258511  |
| 14 | 1 | 0 | 1.702897  | 2.056083  | 1.769683  |
| 15 | 6 | 0 | 1.936092  | 3.265395  | -0.540801 |
| 16 | 1 | 0 | 2.946633  | 2.868364  | -0.655378 |
| 17 | 1 | 0 | 1.646138  | 3.739768  | -1.480413 |
| 18 | 1 | 0 | 1.961513  | 4.029805  | 0.251759  |
| 19 | 6 | 0 | 2.710179  | 0.511335  | 0.669165  |
| 20 | 6 | 0 | 3.499692  | 0.112807  | 1.756900  |
| 21 | 6 | 0 | 3.052490  | 0.056632  | -0.609898 |
| 22 | 6 | 0 | 4.594307  | -0.732773 | 1.574618  |
| 23 | 1 | 0 | 3.253542  | 0.467114  | 2.755134  |
| 24 | 6 | 0 | 4.153408  | -0.783432 | -0.796616 |
| 25 | 1 | 0 | 2.462179  | 0.376348  | -1.462592 |
| 26 | 6 | 0 | 4.925598  | -1.184901 | 0.294588  |
| 27 | 1 | 0 | 5.192632  | -1.032047 | 2.430348  |
| 28 | 1 | 0 | 4.407423  | -1.121399 | -1.797286 |
| 29 | 1 | 0 | 5.781204  | -1.837757 | 0.149475  |
| 30 | 6 | 0 | -0.771243 | -0.023617 | -0.612999 |
| 31 | 6 | 0 | -1.327638 | -1.180302 | -0.185411 |
| 32 | 1 | 0 | 0.155557  | -0.105934 | -1.173815 |
| 33 | 6 | 0 | -0.745942 | -2.506726 | -0.503220 |
| 34 | 8 | 0 | -1.101263 | -3.542407 | 0.038153  |
| 35 | 8 | 0 | 0.225871  | -2.452137 | -1.433460 |
| 36 | 6 | 0 | -2.491104 | -1.231327 | 0.766253  |
| 37 | 8 | 0 | -2.460507 | -0.816271 | 1.907867  |
| 38 | 8 | 0 | -3.570536 | -1.797266 | 0.201314  |
| 39 | 6 | 0 | 0.881454  | -3.700973 | -1.728556 |
| 40 | 1 | 0 | 1.636116  | -3.463783 | -2.476611 |
| 41 | 1 | 0 | 1.348954  | -4.109738 | -0.830292 |
| 42 | 1 | 0 | 0.164743  | -4.423679 | -2.124036 |
| 43 | 6 | 0 | -4.723197 | -1.950416 | 1.058842  |
| 44 | 1 | 0 | -4.476588 | -2.582558 | 1.914226  |
| 45 | 1 | 0 | -5.066464 | -0.976423 | 1.412887  |
| 46 | 1 | 0 | -5.484773 | -2.422889 | 0.440999  |

0901aab\_Ph\_NMeBn\_CHC\_COOMe\_COOMe\_B3lyp631pd\_PCMdms0.log

Standard orientation:

| Center<br>Number | Atomic<br>Number | Atomic<br>Type | Coordinates (Angstroms) |           |           |
|------------------|------------------|----------------|-------------------------|-----------|-----------|
|                  |                  |                | X                       | Y         | Z         |
| 1                | 6                | 0              | 3.032647                | -3.016762 | -0.530146 |
| 2                | 6                | 0              | 2.593063                | -1.699562 | -0.597633 |
| 3                | 6                | 0              | 1.224204                | -1.376758 | -0.540603 |
| 4                | 6                | 0              | 0.269910                | -2.423342 | -0.379089 |
| 5                | 6                | 0              | 0.732032                | -3.749895 | -0.329161 |
| 6                | 6                | 0              | 2.092311                | -4.041860 | -0.406388 |
| 7                | 1                | 0              | 4.091710                | -3.242638 | -0.598124 |
| 8                | 1                | 0              | 3.314105                | -0.905709 | -0.762027 |
| 9                | 1                | 0              | 0.027068                | -4.562819 | -0.206846 |
| 10               | 1                | 0              | 2.416740                | -5.077206 | -0.358616 |
| 11               | 7                | 0              | -1.106219               | -2.109596 | -0.294499 |
| 12               | 6                | 0              | -1.523839               | -1.286956 | 0.854525  |
| 13               | 1                | 0              | -0.687349               | -0.641932 | 1.136643  |
| 14               | 1                | 0              | -1.717691               | -1.933569 | 1.726714  |
| 15               | 6                | 0              | -2.046037               | -3.199257 | -0.556514 |
| 16               | 1                | 0              | -3.044066               | -2.775755 | -0.684269 |
| 17               | 1                | 0              | -1.772790               | -3.716637 | -1.478227 |
| 18               | 1                | 0              | -2.093325               | -3.932934 | 0.263719  |
| 19               | 6                | 0              | -2.749202               | -0.423202 | 0.601718  |
| 20               | 6                | 0              | -3.531602               | -0.019865 | 1.692609  |
| 21               | 6                | 0              | -3.099110               | 0.026655  | -0.677198 |
| 22               | 6                | 0              | -4.626836               | 0.825974  | 1.513791  |
| 23               | 1                | 0              | -3.279643               | -0.370665 | 2.690610  |
| 24               | 6                | 0              | -4.200278               | 0.866645  | -0.860321 |
| 25               | 1                | 0              | -2.514096               | -0.296339 | -1.532259 |
| 26               | 6                | 0              | -4.965540               | 1.273070  | 0.234143  |
| 27               | 1                | 0              | -5.219778               | 1.128901  | 2.371989  |
| 28               | 1                | 0              | -4.459453               | 1.201940  | -1.860530 |
| 29               | 1                | 0              | -5.821406               | 1.926160  | 0.091570  |
| 30               | 6                | 0              | 0.764646                | -0.011676 | -0.780887 |

|    |   |   |           |          |           |
|----|---|---|-----------|----------|-----------|
| 31 | 6 | 0 | 1.356873  | 1.156700 | -0.440736 |
| 32 | 1 | 0 | -0.168112 | 0.077709 | -1.333458 |
| 33 | 6 | 0 | 0.729515  | 2.421419 | -0.909651 |
| 34 | 8 | 0 | -0.208950 | 2.488469 | -1.685418 |
| 35 | 8 | 0 | 1.302733  | 3.501714 | -0.344466 |
| 36 | 6 | 0 | 2.605223  | 1.252310 | 0.386062  |
| 37 | 8 | 0 | 3.659719  | 1.714816 | -0.005972 |
| 38 | 8 | 0 | 2.416990  | 0.756889 | 1.620972  |
| 39 | 6 | 0 | 0.748136  | 4.777526 | -0.720247 |
| 40 | 1 | 0 | 1.332235  | 5.520261 | -0.179345 |
| 41 | 1 | 0 | 0.838893  | 4.930231 | -1.797705 |
| 42 | 1 | 0 | -0.304170 | 4.835307 | -0.434213 |
| 43 | 6 | 0 | 3.575934  | 0.757715 | 2.482477  |
| 44 | 1 | 0 | 4.361745  | 0.127253 | 2.060659  |
| 45 | 1 | 0 | 3.954697  | 1.773442 | 2.610692  |
| 46 | 1 | 0 | 3.231998  | 0.353789 | 3.433085  |

0902dab\_Ph\_NMeBn\_CHC\_COOMe\_COOMe\_ZWion\_B3lyp631pd\_PCMdmso\_TS\_CH.log

Standard orientation:

| Center<br>Number | Atomic<br>Number | Atomic<br>Type | Coordinates (Angstroms) |           |           |
|------------------|------------------|----------------|-------------------------|-----------|-----------|
|                  |                  |                | X                       | Y         | Z         |
| 1                | 6                | 0              | -2.015379               | 3.819213  | -0.488120 |
| 2                | 6                | 0              | -1.914011               | 2.444373  | -0.709760 |
| 3                | 6                | 0              | -0.705344               | 1.765429  | -0.528397 |
| 4                | 6                | 0              | 0.423007                | 2.516296  | -0.139960 |
| 5                | 6                | 0              | 0.326057                | 3.890343  | 0.087725  |
| 6                | 6                | 0              | -0.892805               | 4.544859  | -0.089030 |
| 7                | 1                | 0              | -2.971763               | 4.316492  | -0.616896 |
| 8                | 1                | 0              | -2.786218               | 1.875622  | -1.018601 |
| 9                | 1                | 0              | 1.203921                | 4.440494  | 0.411358  |
| 10               | 1                | 0              | -0.963118               | 5.612309  | 0.093955  |
| 11               | 7                | 0              | 1.690229                | 1.849266  | -0.013749 |
| 12               | 6                | 0              | 1.567601                | 0.549208  | 0.438288  |
| 13               | 1                | 0              | 0.944465                | 0.492130  | 1.331266  |
| 14               | 6                | 0              | 2.732756                | 2.258798  | -0.961389 |
| 15               | 1                | 0              | 3.689302                | 1.833748  | -0.658370 |
| 16               | 1                | 0              | 2.507477                | 1.952635  | -1.991108 |
| 17               | 1                | 0              | 2.812510                | 3.345890  | -0.937499 |
| 18               | 6                | 0              | 2.651156                | -0.457981 | 0.388555  |
| 19               | 6                | 0              | 2.959783                | -1.139309 | 1.579939  |
| 20               | 6                | 0              | 3.329098                | -0.815920 | -0.791868 |
| 21               | 6                | 0              | 3.947786                | -2.122041 | 1.601264  |
| 22               | 1                | 0              | 2.428868                | -0.886268 | 2.492867  |
| 23               | 6                | 0              | 4.309454                | -1.804645 | -0.768505 |
| 24               | 1                | 0              | 3.073562                | -0.341774 | -1.732798 |
| 25               | 6                | 0              | 4.626529                | -2.455403 | 0.427506  |
| 26               | 1                | 0              | 4.182583                | -2.629721 | 2.531476  |
| 27               | 1                | 0              | 4.821242                | -2.073958 | -1.687036 |
| 28               | 1                | 0              | 5.391645                | -3.225453 | 0.440738  |
| 29               | 6                | 0              | -0.617304               | 0.290845  | -0.850247 |
| 30               | 6                | 0              | -1.571689               | -0.661967 | -0.351042 |
| 31               | 1                | 0              | -0.408790               | 0.107735  | -1.908091 |
| 32               | 1                | 0              | 0.540384                | 0.023254  | -0.358142 |
| 33               | 6                | 0              | -1.842124               | -1.791913 | -1.230588 |
| 34               | 8                | 0              | -1.382874               | -1.908807 | -2.369598 |
| 35               | 8                | 0              | -2.643908               | -2.755246 | -0.701930 |
| 36               | 6                | 0              | -2.017111               | -0.506749 | 1.026364  |
| 37               | 8                | 0              | -1.424657               | 0.187947  | 1.856807  |
| 38               | 8                | 0              | -3.168998               | -1.149189 | 1.350059  |
| 39               | 6                | 0              | -2.916730               | -3.868342 | -1.563566 |
| 40               | 1                | 0              | -1.996617               | -4.395405 | -1.829442 |
| 41               | 1                | 0              | -3.574162               | -4.525404 | -0.993749 |
| 42               | 1                | 0              | -3.413215               | -3.543879 | -2.481827 |
| 43               | 6                | 0              | -3.586907               | -1.013927 | 2.716035  |
| 44               | 1                | 0              | -4.493622               | -1.612378 | 2.805693  |
| 45               | 1                | 0              | -2.820063               | -1.385791 | 3.400537  |
| 46               | 1                | 0              | -3.799439               | 0.030217  | 2.959963  |

0903aab\_Ph\_NMeBn\_CHC\_COOMe\_COOMe\_ZWion\_B3lyp631pd\_PCMdmso.log

Standard orientation:

| Center<br>Number | Atomic<br>Number | Atomic<br>Type | Coordinates (Angstroms) |           |           |
|------------------|------------------|----------------|-------------------------|-----------|-----------|
|                  |                  |                | X                       | Y         | Z         |
| 1                | 6                | 0              | -1.829174               | 3.530693  | 1.053571  |
| 2                | 6                | 0              | -1.925998               | 2.374039  | 0.287049  |
| 3                | 6                | 0              | -0.791358               | 1.670900  | -0.157078 |
| 4                | 6                | 0              | 0.451961                | 2.206591  | 0.215119  |
| 5                | 6                | 0              | 0.569698                | 3.367480  | 0.989828  |
| 6                | 6                | 0              | -0.574680               | 4.031517  | 1.415401  |
| 7                | 1                | 0              | -2.731664               | 4.044928  | 1.370255  |
| 8                | 1                | 0              | -2.898718               | 1.991278  | -0.003751 |
| 9                | 1                | 0              | 1.553892                | 3.731942  | 1.266294  |
| 10               | 1                | 0              | -0.487651               | 4.926569  | 2.022552  |
| 11               | 7                | 0              | 1.702915                | 1.591383  | -0.220402 |
| 12               | 6                | 0              | 1.996682                | 0.394138  | 0.207613  |
| 13               | 1                | 0              | 1.202598                | -0.081216 | 0.788853  |
| 14               | 6                | 0              | 2.518529                | 2.386674  | -1.159001 |
| 15               | 1                | 0              | 3.229698                | 3.012216  | -0.614687 |
| 16               | 1                | 0              | 3.052039                | 1.720646  | -1.835860 |
| 17               | 1                | 0              | 1.843993                | 3.024317  | -1.727328 |
| 18               | 6                | 0              | 3.166772                | -0.421084 | -0.048271 |
| 19               | 6                | 0              | 2.962685                | -1.809111 | 0.134400  |
| 20               | 6                | 0              | 4.453065                | 0.046976  | -0.397771 |
| 21               | 6                | 0              | 4.002801                | -2.705751 | -0.080529 |
| 22               | 1                | 0              | 1.976215                | -2.156818 | 0.427302  |
| 23               | 6                | 0              | 5.491521                | -0.858319 | -0.584235 |
| 24               | 1                | 0              | 4.660437                | 1.105668  | -0.478036 |
| 25               | 6                | 0              | 5.267055                | -2.231643 | -0.440690 |
| 26               | 1                | 0              | 3.833814                | -3.770208 | 0.043338  |
| 27               | 1                | 0              | 6.481052                | -0.492901 | -0.837417 |
| 28               | 1                | 0              | 6.083334                | -2.930052 | -0.596317 |
| 29               | 6                | 0              | -0.995067               | 0.430176  | -1.022149 |
| 30               | 6                | 0              | -1.945501               | -0.606549 | -0.445106 |
| 31               | 1                | 0              | -1.421036               | 0.771450  | -1.970884 |
| 32               | 1                | 0              | -0.032383               | -0.030360 | -1.255088 |
| 33               | 6                | 0              | -3.278027               | -0.578398 | -0.966072 |
| 34               | 8                | 0              | -3.701185               | 0.261489  | -1.782072 |
| 35               | 8                | 0              | -4.131663               | -1.562774 | -0.518516 |
| 36               | 6                | 0              | -1.405292               | -1.463904 | 0.547863  |
| 37               | 8                | 0              | -0.230642               | -1.395587 | 0.985458  |
| 38               | 8                | 0              | -2.233724               | -2.433238 | 1.062048  |
| 39               | 6                | 0              | -5.459972               | -1.497048 | -1.038428 |
| 40               | 1                | 0              | -5.473488               | -1.605039 | -2.127262 |
| 41               | 1                | 0              | -5.998755               | -2.327742 | -0.578696 |
| 42               | 1                | 0              | -5.947493               | -0.551572 | -0.781613 |
| 43               | 6                | 0              | -1.657512               | -3.268008 | 2.067350  |
| 44               | 1                | 0              | -2.455873               | -3.942898 | 2.381590  |
| 45               | 1                | 0              | -0.816420               | -3.849736 | 1.677289  |
| 46               | 1                | 0              | -1.305423               | -2.685486 | 2.923749  |

0911aaa\_Ph\_NMeBn\_CHC\_COOMe\_COOMe\_product\_B3lyp631pd\_PCMDmso.log

Standard orientation:

| Center<br>Number | Atomic<br>Number | Atomic<br>Type | Coordinates (Angstroms) |           |          |
|------------------|------------------|----------------|-------------------------|-----------|----------|
|                  |                  |                | X                       | Y         | Z        |
| 1                | 6                | 0              | -4.755539               | -0.329767 | 0.448257 |
| 2                | 6                | 0              | -3.736694               | 0.597436  | 0.671529 |
| 3                | 6                | 0              | -2.394133               | 0.217412  | 0.709788 |
| 4                | 6                | 0              | -2.038677               | -1.134926 | 0.480668 |
| 5                | 6                | 0              | -3.075003               | -2.066716 | 0.255066 |
| 6                | 6                | 0              | -4.409476               | -1.666134 | 0.244023 |
| 7                | 1                | 0              | -5.793997               | -0.014746 | 0.433450 |
| 8                | 1                | 0              | -3.982425               | 1.643685  | 0.837929 |
| 9                | 1                | 0              | -2.836359               | -3.107697 | 0.073297 |
| 10               | 1                | 0              | -5.181245               | -2.409832 | 0.065731 |
| 11               | 7                | 0              | -0.703651               | -1.546787 | 0.470595 |
| 12               | 6                | 0              | 0.385353                | -0.584721 | 0.684859 |
| 13               | 1                | 0              | 0.546791                | -0.447308 | 1.765153 |
| 14               | 6                | 0              | -0.430465               | -2.938026 | 0.837411 |
| 15               | 1                | 0              | 0.614828                | -3.042765 | 1.122986 |
| 16               | 1                | 0              | -1.052223               | -3.250790 | 1.685351 |
| 17               | 1                | 0              | -0.614323               | -3.625730 | 0.003948 |

|    |   |   |           |           |           |
|----|---|---|-----------|-----------|-----------|
| 18 | 6 | 0 | 1.726381  | -1.071861 | 0.129049  |
| 19 | 6 | 0 | 2.878779  | -0.869594 | 0.902110  |
| 20 | 6 | 0 | 1.854834  | -1.727330 | -1.103932 |
| 21 | 6 | 0 | 4.133430  | -1.280193 | 0.446160  |
| 22 | 1 | 0 | 2.794289  | -0.392551 | 1.875021  |
| 23 | 6 | 0 | 3.105755  | -2.147723 | -1.555836 |
| 24 | 1 | 0 | 0.971443  | -1.898290 | -1.704653 |
| 25 | 6 | 0 | 4.250739  | -1.920967 | -0.787370 |
| 26 | 1 | 0 | 5.012178  | -1.110282 | 1.061221  |
| 27 | 1 | 0 | 3.186234  | -2.655913 | -2.512551 |
| 28 | 1 | 0 | 5.222650  | -2.249675 | -1.143421 |
| 29 | 6 | 0 | -1.309501 | 1.224545  | 1.002456  |
| 30 | 6 | 0 | -0.036490 | 0.852602  | 0.200737  |
| 31 | 1 | 0 | -1.639211 | 2.232731  | 0.744291  |
| 32 | 1 | 0 | -1.051296 | 1.231143  | 2.066089  |
| 33 | 6 | 0 | 1.122294  | 1.818390  | 0.482239  |
| 34 | 8 | 0 | 1.845445  | 2.291819  | -0.370644 |
| 35 | 8 | 0 | 1.258941  | 2.056782  | 1.795073  |
| 36 | 6 | 0 | -0.359460 | 0.963753  | -1.303378 |
| 37 | 8 | 0 | -0.245408 | 0.096039  | -2.141353 |
| 38 | 8 | 0 | -0.834839 | 2.191302  | -1.578101 |
| 39 | 6 | 0 | 2.346823  | 2.932263  | 2.169726  |
| 40 | 1 | 0 | 2.296882  | 3.008663  | 3.254238  |
| 41 | 1 | 0 | 3.300486  | 2.503555  | 1.856704  |
| 42 | 1 | 0 | 2.217068  | 3.912455  | 1.707749  |
| 43 | 6 | 0 | -1.174906 | 2.442213  | -2.956964 |
| 44 | 1 | 0 | -1.952029 | 1.751014  | -3.289095 |
| 45 | 1 | 0 | -1.538090 | 3.468135  | -2.985359 |
| 46 | 1 | 0 | -0.293487 | 2.330241  | -3.591627 |

-----  
1001aab\_Ph\_NMeBn\_CHC\_COOMe\_H\_B3Iyp631pd\_PCdmsol.log

Standard orientation:

| Center<br>Number | Atomic<br>Number | Atomic<br>Type | Coordinates (Angstroms) |           |           |
|------------------|------------------|----------------|-------------------------|-----------|-----------|
|                  |                  |                | X                       | Y         | Z         |
| 1                | 6                | 0              | 4.541779                | 0.291263  | 0.211397  |
| 2                | 6                | 0              | 3.344909                | 0.994622  | 0.144653  |
| 3                | 6                | 0              | 2.110576                | 0.342917  | -0.035863 |
| 4                | 6                | 0              | 2.087902                | -1.080992 | -0.117973 |
| 5                | 6                | 0              | 3.310124                | -1.774664 | -0.068750 |
| 6                | 6                | 0              | 4.518718                | -1.099984 | 0.089820  |
| 7                | 1                | 0              | 5.481203                | 0.820627  | 0.333427  |
| 8                | 1                | 0              | 3.360950                | 2.079220  | 0.182810  |
| 9                | 1                | 0              | 3.318801                | -2.855800 | -0.132067 |
| 10               | 1                | 0              | 5.443648                | -1.667921 | 0.129469  |
| 11               | 7                | 0              | 0.856522                | -1.763755 | -0.270813 |
| 12               | 6                | 0              | -0.106170               | -1.637664 | 0.836062  |
| 13               | 1                | 0              | 0.054620                | -0.671566 | 1.322237  |
| 14               | 1                | 0              | 0.099362                | -2.402290 | 1.604226  |
| 15               | 6                | 0              | 0.922519                | -3.132050 | -0.781963 |
| 16               | 1                | 0              | -0.083945               | -3.448128 | -1.063663 |
| 17               | 1                | 0              | 1.554698                | -3.170294 | -1.671371 |
| 18               | 1                | 0              | 1.306314                | -3.852180 | -0.041598 |
| 19               | 6                | 0              | -1.564501               | -1.740551 | 0.417701  |
| 20               | 6                | 0              | -2.518041               | -2.134493 | 1.366632  |
| 21               | 6                | 0              | -1.998854               | -1.407460 | -0.871168 |
| 22               | 6                | 0              | -3.874257               | -2.179424 | 1.041927  |
| 23               | 1                | 0              | -2.194830               | -2.407221 | 2.368523  |
| 24               | 6                | 0              | -3.355380               | -1.459400 | -1.201444 |
| 25               | 1                | 0              | -1.266779               | -1.122843 | -1.620255 |
| 26               | 6                | 0              | -4.298411               | -1.841360 | -0.245810 |
| 27               | 1                | 0              | -4.598231               | -2.485732 | 1.791546  |
| 28               | 1                | 0              | -3.673455               | -1.202146 | -2.207767 |
| 29               | 1                | 0              | -5.352820               | -1.881841 | -0.502636 |
| 30               | 6                | 0              | 0.884335                | 1.114887  | -0.225920 |
| 31               | 6                | 0              | 0.648936                | 2.376280  | 0.188301  |
| 32               | 1                | 0              | 0.085610                | 0.618746  | -0.771463 |
| 33               | 6                | 0              | -0.620390               | 3.046665  | -0.139306 |
| 34               | 8                | 0              | -1.541460               | 2.573982  | -0.788880 |
| 35               | 8                | 0              | -0.653620               | 4.295062  | 0.384488  |
| 36               | 6                | 0              | -1.851389               | 5.048729  | 0.127710  |
| 37               | 1                | 0              | -1.702629               | 6.013090  | 0.611740  |
| 38               | 1                | 0              | -2.000103               | 5.181395  | -0.946517 |



|    |   |   |           |          |          |
|----|---|---|-----------|----------|----------|
| 39 | 1 | 0 | -2.723011 | 4.542384 | 0.549094 |
| 40 | 1 | 0 | 1.361159  | 2.942521 | 0.779063 |

1002dab\_Ph\_NMeBn\_CHC\_COOMe\_H\_ZWion\_B3lyp631pd\_PCMdms0\_TS\_CH.log

Standard orientation:

| Center<br>Number | Atomic<br>Number | Atomic<br>Type | Coordinates (Angstroms) |           |           |
|------------------|------------------|----------------|-------------------------|-----------|-----------|
|                  |                  |                | X                       | Y         | Z         |
| 1                | 6                | 0              | -2.195403               | -3.479360 | -0.661900 |
| 2                | 6                | 0              | -2.271410               | -2.086311 | -0.622089 |
| 3                | 6                | 0              | -1.181913               | -1.297459 | -0.235200 |
| 4                | 6                | 0              | -0.009974               | -1.988392 | 0.112413  |
| 5                | 6                | 0              | 0.091640                | -3.378904 | 0.087629  |
| 6                | 6                | 0              | -1.013619               | -4.132310 | -0.307112 |
| 7                | 1                | 0              | -3.061931               | -4.057115 | -0.970150 |
| 8                | 1                | 0              | -3.190640               | -1.566890 | -0.877710 |
| 9                | 1                | 0              | 1.023272                | -3.858523 | 0.371124  |
| 10               | 1                | 0              | -0.947372               | -5.214952 | -0.337813 |
| 11               | 7                | 0              | 1.147609                | -1.219586 | 0.562037  |
| 12               | 6                | 0              | 1.807166                | -0.534140 | -0.341350 |
| 13               | 1                | 0              | 1.441781                | -0.693663 | -1.351009 |
| 14               | 6                | 0              | 1.402042                | -1.189078 | 2.013942  |
| 15               | 1                | 0              | 2.332507                | -1.712137 | 2.246210  |
| 16               | 1                | 0              | 1.453039                | -0.156752 | 2.365042  |
| 17               | 1                | 0              | 0.576594                | -1.695633 | 2.507924  |
| 18               | 6                | 0              | 2.931520                | 0.365086  | -0.230695 |
| 19               | 6                | 0              | 3.264683                | 1.040527  | -1.431133 |
| 20               | 6                | 0              | 3.716707                | 0.608834  | 0.921837  |
| 21               | 6                | 0              | 4.320452                | 1.940126  | -1.475035 |
| 22               | 1                | 0              | 2.677833                | 0.855001  | -2.325401 |
| 23               | 6                | 0              | 4.777589                | 1.504285  | 0.864352  |
| 24               | 1                | 0              | 3.526094                | 0.095578  | 1.852154  |
| 25               | 6                | 0              | 5.079456                | 2.175437  | -0.325034 |
| 26               | 1                | 0              | 4.555213                | 2.453493  | -2.401206 |
| 27               | 1                | 0              | 5.375564                | 1.678331  | 1.752506  |
| 28               | 1                | 0              | 5.908797                | 2.874805  | -0.355864 |
| 29               | 6                | 0              | -1.281019               | 0.230105  | -0.174234 |
| 30               | 6                | 0              | -2.546829               | 0.846554  | -0.664787 |
| 31               | 1                | 0              | -1.144906               | 0.543066  | 0.870476  |
| 32               | 1                | 0              | -0.389086               | 0.629053  | -0.702606 |
| 33               | 6                | 0              | -3.265203               | 1.725067  | 0.137067  |
| 34               | 8                | 0              | -3.053436               | 2.075992  | 1.324402  |
| 35               | 8                | 0              | -4.389998               | 2.266656  | -0.536125 |
| 36               | 6                | 0              | -5.203342               | 3.125572  | 0.245909  |
| 37               | 1                | 0              | -4.644661               | 3.983037  | 0.638249  |
| 38               | 1                | 0              | -5.996493               | 3.483845  | -0.416288 |
| 39               | 1                | 0              | -5.657308               | 2.606605  | 1.099607  |
| 40               | 1                | 0              | -2.859342               | 0.694930  | -1.693212 |

1003aab\_Ph\_NMeBn\_CHC\_COOMe\_H\_ZWion\_B3lyp631pd\_PCMdms0.log

Standard orientation:

| Center<br>Number | Atomic<br>Number | Atomic<br>Type | Coordinates (Angstroms) |           |           |
|------------------|------------------|----------------|-------------------------|-----------|-----------|
|                  |                  |                | X                       | Y         | Z         |
| 1                | 6                | 0              | 1.879942                | 3.387368  | -0.468451 |
| 2                | 6                | 0              | 2.202932                | 2.041586  | -0.296282 |
| 3                | 6                | 0              | 1.239708                | 1.082031  | 0.041025  |
| 4                | 6                | 0              | -0.076359               | 1.552706  | 0.187911  |
| 5                | 6                | 0              | -0.425662               | 2.894289  | 0.009331  |
| 6                | 6                | 0              | 0.560839                | 3.820754  | -0.321396 |
| 7                | 1                | 0              | 2.658605                | 4.099144  | -0.726838 |
| 8                | 1                | 0              | 3.218368                | 1.688039  | -0.446561 |
| 9                | 1                | 0              | -1.457997               | 3.202691  | 0.142320  |
| 10               | 1                | 0              | 0.298357                | 4.864133  | -0.462304 |
| 11               | 7                | 0              | -1.149282               | 0.632564  | 0.553806  |
| 12               | 6                | 0              | -2.078665               | 0.380427  | -0.332204 |
| 13               | 1                | 0              | -1.855902               | 0.781795  | -1.316709 |
| 14               | 6                | 0              | -1.149038               | 0.144812  | 1.945837  |
| 15               | 1                | 0              | -1.766295               | 0.800009  | 2.565885  |
| 16               | 1                | 0              | -1.520089               | -0.878561 | 1.983576  |

|    |   |   |           |           |           |
|----|---|---|-----------|-----------|-----------|
| 17 | 1 | 0 | -0.125975 | 0.175989  | 2.311968  |
| 18 | 6 | 0 | -3.314761 | -0.358804 | -0.223535 |
| 19 | 6 | 0 | -3.889029 | -0.739945 | -1.460106 |
| 20 | 6 | 0 | -3.994506 | -0.686865 | 0.973158  |
| 21 | 6 | 0 | -5.074175 | -1.462117 | -1.500098 |
| 22 | 1 | 0 | -3.388098 | -0.471982 | -2.385046 |
| 23 | 6 | 0 | -5.189886 | -1.392840 | 0.920835  |
| 24 | 1 | 0 | -3.623007 | -0.365394 | 1.935433  |
| 25 | 6 | 0 | -5.725726 | -1.791634 | -0.308374 |
| 26 | 1 | 0 | -5.494901 | -1.758891 | -2.454673 |
| 27 | 1 | 0 | -5.710174 | -1.629677 | 1.842616  |
| 28 | 1 | 0 | -6.657252 | -2.347819 | -0.336209 |
| 29 | 6 | 0 | 1.620074  | -0.389359 | 0.221565  |
| 30 | 6 | 0 | 2.785404  | -0.876565 | -0.580254 |
| 31 | 1 | 0 | 1.880910  | -0.545753 | 1.278793  |
| 32 | 1 | 0 | 0.703896  | -0.981337 | 0.053491  |
| 33 | 6 | 0 | 3.917423  | -1.373218 | 0.045613  |
| 34 | 8 | 0 | 4.175738  | -1.481138 | 1.272767  |
| 35 | 8 | 0 | 4.895104  | -1.821742 | -0.887365 |
| 36 | 6 | 0 | 6.096172  | -2.306141 | -0.313187 |
| 37 | 1 | 0 | 5.923874  | -3.146802 | 0.369170  |
| 38 | 1 | 0 | 6.721579  | -2.641604 | -1.145805 |
| 39 | 1 | 0 | 6.635317  | -1.531361 | 0.247189  |
| 40 | 1 | 0 | 2.728888  | -0.876444 | -1.664462 |

1011aaa\_Ph\_NMeBn\_CHC\_COOMe\_H\_product\_B3lyp631pd\_PCMDmso.log

Standard orientation:

| Center<br>Number | Atomic<br>Number | Atomic<br>Type | Coordinates (Angstroms) |           |           |
|------------------|------------------|----------------|-------------------------|-----------|-----------|
|                  |                  |                | X                       | Y         | Z         |
| 1                | 6                | 0              | -4.847815               | 0.266603  | -0.420459 |
| 2                | 6                | 0              | -3.764660               | 1.146617  | -0.447489 |
| 3                | 6                | 0              | -2.470189               | 0.733035  | -0.129860 |
| 4                | 6                | 0              | -2.227959               | -0.623481 | 0.201398  |
| 5                | 6                | 0              | -3.329686               | -1.507292 | 0.230408  |
| 6                | 6                | 0              | -4.615450               | -1.064491 | -0.074399 |
| 7                | 1                | 0              | -5.847092               | 0.613791  | -0.663275 |
| 8                | 1                | 0              | -3.922319               | 2.190586  | -0.709144 |
| 9                | 1                | 0              | -3.181985               | -2.550339 | 0.481456  |
| 10               | 1                | 0              | -5.437747               | -1.774113 | -0.043589 |
| 11               | 7                | 0              | -0.940038               | -1.090640 | 0.480601  |
| 12               | 6                | 0              | 0.217679                | -0.183934 | 0.508301  |
| 13               | 1                | 0              | 0.346573                | 0.240824  | 1.515504  |
| 14               | 6                | 0              | -0.820786               | -2.311072 | 1.276946  |
| 15               | 1                | 0              | 0.210310                | -2.427351 | 1.607225  |
| 16               | 1                | 0              | -1.467297               | -2.278115 | 2.163953  |
| 17               | 1                | 0              | -1.081088               | -3.202951 | 0.696018  |
| 18               | 6                | 0              | 1.505980                | -0.917127 | 0.140930  |
| 19               | 6                | 0              | 2.654902                | -0.760181 | 0.925062  |
| 20               | 6                | 0              | 1.575709                | -1.717124 | -1.008840 |
| 21               | 6                | 0              | 3.853530                | -1.383226 | 0.566383  |
| 22               | 1                | 0              | 2.611021                | -0.148338 | 1.822000  |
| 23               | 6                | 0              | 2.769633                | -2.341962 | -1.366845 |
| 24               | 1                | 0              | 0.685132                | -1.858265 | -1.614500 |
| 25               | 6                | 0              | 3.913895                | -2.175220 | -0.580649 |
| 26               | 1                | 0              | 4.735192                | -1.253167 | 1.187065  |
| 27               | 1                | 0              | 2.808110                | -2.960693 | -2.258705 |
| 28               | 1                | 0              | 4.842994                | -2.663525 | -0.859238 |
| 29               | 6                | 0              | -1.327014               | 1.716791  | -0.119465 |
| 30               | 6                | 0              | -0.013153               | 0.998826  | -0.467028 |
| 31               | 1                | 0              | -1.516076               | 2.525878  | -0.832960 |
| 32               | 1                | 0              | -1.224070               | 2.184992  | 0.867769  |
| 33               | 6                | 0              | 1.159081                | 1.964735  | -0.471285 |
| 34               | 8                | 0              | 1.794896                | 2.279214  | -1.458332 |
| 35               | 8                | 0              | 1.397861                | 2.466280  | 0.755991  |
| 36               | 6                | 0              | 2.484896                | 3.409763  | 0.854271  |
| 37               | 1                | 0              | 2.522533                | 3.705086  | 1.901533  |
| 38               | 1                | 0              | 3.423698                | 2.939156  | 0.555377  |
| 39               | 1                | 0              | 2.295052                | 4.276735  | 0.218414  |
| 40               | 1                | 0              | -0.076303               | 0.602768  | -1.484655 |

1101aab\_Ph\_NMeBn\_CHC\_NO2\_NO2\_B3lyp631pd\_PCMDmso.log

Standard orientation:

| Center Number | Atomic Number | Atomic Type | Coordinates (Angstroms) |           |           |
|---------------|---------------|-------------|-------------------------|-----------|-----------|
|               |               |             | X                       | Y         | Z         |
| 1             | 6             | 0           | -3.817776               | 1.865704  | -0.163501 |
| 2             | 6             | 0           | -3.062819               | 0.707329  | -0.192139 |
| 3             | 6             | 0           | -1.649101               | 0.753354  | -0.217555 |
| 4             | 6             | 0           | -0.984645               | 2.020123  | -0.148765 |
| 5             | 6             | 0           | -1.777755               | 3.185216  | -0.149407 |
| 6             | 6             | 0           | -3.164122               | 3.106259  | -0.154242 |
| 7             | 1             | 0           | -4.900749               | 1.812826  | -0.174596 |
| 8             | 1             | 0           | -3.567954               | -0.247797 | -0.278946 |
| 9             | 1             | 0           | -1.307070               | 4.158702  | -0.106638 |
| 10            | 1             | 0           | -3.745019               | 4.023341  | -0.134419 |
| 11            | 7             | 0           | 0.410580                | 2.085897  | -0.102147 |
| 12            | 6             | 0           | 1.127476                | 1.352928  | 0.956497  |
| 13            | 1             | 0           | 0.458382                | 0.594510  | 1.370861  |
| 14            | 1             | 0           | 1.344055                | 2.046232  | 1.784199  |
| 15            | 6             | 0           | 1.041263                | 3.370962  | -0.410835 |
| 16            | 1             | 0           | 2.107445                | 3.202215  | -0.569985 |
| 17            | 1             | 0           | 0.620612                | 3.788015  | -1.327239 |
| 18            | 1             | 0           | 0.928996                | 4.101155  | 0.403730  |
| 19            | 6             | 0           | 2.426484                | 0.695721  | 0.515226  |
| 20            | 6             | 0           | 3.326116                | 0.265112  | 1.501223  |
| 21            | 6             | 0           | 2.746817                | 0.476064  | -0.828888 |
| 22            | 6             | 0           | 4.509664                | -0.383832 | 1.152320  |
| 23            | 1             | 0           | 3.095698                | 0.438235  | 2.549771  |
| 24            | 6             | 0           | 3.936594                | -0.168422 | -1.181099 |
| 25            | 1             | 0           | 2.070222                | 0.822047  | -1.604139 |
| 26            | 6             | 0           | 4.819675                | -0.603435 | -0.193192 |
| 27            | 1             | 0           | 5.192875                | -0.713089 | 1.929747  |
| 28            | 1             | 0           | 4.170504                | -0.326571 | -2.229846 |
| 29            | 1             | 0           | 5.743685                | -1.104010 | -0.466516 |
| 30            | 6             | 0           | -0.866152               | -0.428716 | -0.479244 |
| 31            | 6             | 0           | -1.139919               | -1.723951 | -0.204342 |
| 32            | 1             | 0           | 0.073337                | -0.283351 | -1.005993 |
| 33            | 7             | 0           | -0.277796               | -2.794274 | -0.642019 |
| 34            | 8             | 0           | -0.454186               | -3.909664 | -0.141623 |
| 35            | 8             | 0           | 0.604326                | -2.525645 | -1.462091 |
| 36            | 7             | 0           | -2.269309               | -2.181814 | 0.613706  |
| 37            | 8             | 0           | -3.076509               | -2.944197 | 0.087985  |
| 38            | 8             | 0           | -2.343649               | -1.748447 | 1.760838  |

1102dab\_Ph\_NMeBn\_CHC\_NO2\_NO2\_ZWion\_B3lyp631pd\_PCmDmso\_TS\_CH.log

Standard orientation:

| Center Number | Atomic Number | Atomic Type | Coordinates (Angstroms) |           |           |
|---------------|---------------|-------------|-------------------------|-----------|-----------|
|               |               |             | X                       | Y         | Z         |
| 1             | 6             | 0           | 4.295143                | -0.852351 | -0.711544 |
| 2             | 6             | 0           | 3.261138                | 0.023326  | -1.039271 |
| 3             | 6             | 0           | 1.934646                | -0.261382 | -0.691506 |
| 4             | 6             | 0           | 1.606976                | -1.476182 | -0.031901 |
| 5             | 6             | 0           | 2.670440                | -2.338420 | 0.295289  |
| 6             | 6             | 0           | 3.989575                | -2.029386 | -0.031298 |
| 7             | 1             | 0           | 5.318760                | -0.608915 | -0.975377 |
| 8             | 1             | 0           | 3.481516                | 0.955590  | -1.550500 |
| 9             | 1             | 0           | 2.462224                | -3.272579 | 0.801745  |
| 10            | 1             | 0           | 4.778188                | -2.726015 | 0.237083  |
| 11            | 7             | 0           | 0.277439                | -1.772754 | 0.329636  |
| 12            | 6             | 0           | -0.735047               | -1.825357 | -0.731470 |
| 13            | 1             | 0           | -0.384628               | -1.235731 | -1.583289 |
| 14            | 6             | 0           | 0.072419                | -2.805002 | 1.341803  |
| 15            | 1             | 0           | -0.965111               | -2.756779 | 1.678999  |
| 16            | 1             | 0           | 0.258899                | -3.823725 | 0.965926  |
| 17            | 1             | 0           | 0.718918                | -2.622328 | 2.202584  |
| 18            | 6             | 0           | -2.107387               | -1.323802 | -0.309551 |
| 19            | 6             | 0           | -2.265933               | -0.370119 | 0.703540  |
| 20            | 6             | 0           | -3.245153               | -1.792364 | -0.979944 |
| 21            | 6             | 0           | -3.535673               | 0.110465  | 1.032757  |
| 22            | 1             | 0           | -1.389812               | -0.016835 | 1.238225  |
| 23            | 6             | 0           | -4.513456               | -1.307814 | -0.657401 |

|    |   |   |           |           |           |
|----|---|---|-----------|-----------|-----------|
| 24 | 1 | 0 | -3.136860 | -2.541831 | -1.760421 |
| 25 | 6 | 0 | -4.662916 | -0.353238 | 0.351840  |
| 26 | 1 | 0 | -3.642874 | 0.847837  | 1.823272  |
| 27 | 1 | 0 | -5.384562 | -1.681254 | -1.188009 |
| 28 | 1 | 0 | -5.649663 | 0.020721  | 0.608567  |
| 29 | 6 | 0 | 0.919260  | 0.765279  | -1.036372 |
| 30 | 6 | 0 | 0.549174  | 1.779885  | -0.254745 |
| 31 | 1 | 0 | 0.467674  | 0.774955  | -2.027269 |
| 32 | 1 | 0 | -0.829950 | -2.855188 | -1.114097 |
| 33 | 7 | 0 | -0.442219 | 2.774689  | -0.676347 |
| 34 | 8 | 0 | -0.773895 | 2.777946  | -1.857690 |
| 35 | 8 | 0 | -0.897534 | 3.510496  | 0.195375  |
| 36 | 7 | 0 | 1.102809  | 2.042110  | 1.082037  |
| 37 | 8 | 0 | 0.977915  | 1.171292  | 1.935614  |
| 38 | 8 | 0 | 1.684996  | 3.111833  | 1.225942  |

1103aab\_Ph\_NMeBn\_CHC\_NO2\_NO2\_ZWion\_B3lyp631pd\_PCMdmsol.log

Standard orientation:

| Center Number | Atomic Number | Atomic Type | Coordinates (Angstroms) |           |           |
|---------------|---------------|-------------|-------------------------|-----------|-----------|
|               |               |             | X                       | Y         | Z         |
| 1             | 6             | 0           | -2.747807               | 2.877069  | 0.984060  |
| 2             | 6             | 0           | -2.719031               | 1.698981  | 0.241478  |
| 3             | 6             | 0           | -1.514381               | 1.159975  | -0.237523 |
| 4             | 6             | 0           | -0.342894               | 1.864315  | 0.071517  |
| 5             | 6             | 0           | -0.351355               | 3.046532  | 0.815908  |
| 6             | 6             | 0           | -1.562354               | 3.555799  | 1.276389  |
| 7             | 1             | 0           | -3.697802               | 3.266953  | 1.336144  |
| 8             | 1             | 0           | -3.640259               | 1.173648  | 0.011679  |
| 9             | 1             | 0           | 0.584930                | 3.550678  | 1.032044  |
| 10            | 1             | 0           | -1.577372               | 4.471144  | 1.858519  |
| 11            | 7             | 0           | 0.953209                | 1.386398  | -0.402546 |
| 12            | 6             | 0           | 1.606934                | 0.540031  | 0.343433  |
| 13            | 1             | 0           | 1.049385                | 0.196690  | 1.207473  |
| 14            | 6             | 0           | 1.400080                | 1.913139  | -1.705999 |
| 15            | 1             | 0           | 1.905122                | 2.872000  | -1.568093 |
| 16            | 1             | 0           | 2.067587                | 1.200121  | -2.186858 |
| 17            | 1             | 0           | 0.515242                | 2.065692  | -2.322492 |
| 18            | 6             | 0           | 2.923741                | -0.032334 | 0.154831  |
| 19            | 6             | 0           | 3.129341                | -1.287119 | 0.771506  |
| 20            | 6             | 0           | 3.991623                | 0.586790  | -0.530207 |
| 21            | 6             | 0           | 4.356900                | -1.928714 | 0.660594  |
| 22            | 1             | 0           | 2.306576                | -1.756876 | 1.300800  |
| 23            | 6             | 0           | 5.223863                | -0.052108 | -0.609505 |
| 24            | 1             | 0           | 3.882755                | 1.576648  | -0.954065 |
| 25            | 6             | 0           | 5.404891                | -1.311203 | -0.028083 |
| 26            | 1             | 0           | 4.501891                | -2.901365 | 1.118277  |
| 27            | 1             | 0           | 6.047287                | 0.434471  | -1.121090 |
| 28            | 1             | 0           | 6.368593                | -1.805077 | -0.101914 |
| 29            | 6             | 0           | -1.532347               | -0.124816 | -1.059049 |
| 30            | 6             | 0           | -2.151641               | -1.303116 | -0.361775 |
| 31            | 1             | 0           | -2.113282               | 0.054973  | -1.965653 |
| 32            | 1             | 0           | -0.519690               | -0.398686 | -1.355893 |
| 33            | 7             | 0           | -3.483912               | -1.626468 | -0.613103 |
| 34            | 8             | 0           | -4.134197               | -0.822048 | -1.343551 |
| 35            | 8             | 0           | -4.027313               | -2.652807 | -0.157006 |
| 36            | 7             | 0           | -1.375370               | -2.042564 | 0.515657  |
| 37            | 8             | 0           | -0.181412               | -1.632092 | 0.682825  |
| 38            | 8             | 0           | -1.786057               | -3.048292 | 1.128434  |

1111aaa\_Ph\_NMeBn\_CHC\_NO2\_NO2\_product\_B3lyp631pd\_PCMdmsol.log

Standard orientation:

| Center Number | Atomic Number | Atomic Type | Coordinates (Angstroms) |           |           |
|---------------|---------------|-------------|-------------------------|-----------|-----------|
|               |               |             | X                       | Y         | Z         |
| 1             | 6             | 0           | 4.691292                | -0.626211 | -0.540739 |
| 2             | 6             | 0           | 3.759395                | 0.359736  | -0.855006 |
| 3             | 6             | 0           | 2.394741                | 0.186031  | -0.604088 |
| 4             | 6             | 0           | 1.942927                | -1.021414 | -0.014534 |
| 5             | 6             | 0           | 2.896748                | -2.005832 | 0.323032  |

|    |   |   |           |           |           |
|----|---|---|-----------|-----------|-----------|
| 6  | 6 | 0 | 4.247503  | -1.808141 | 0.058213  |
| 7  | 1 | 0 | 5.744955  | -0.470689 | -0.747740 |
| 8  | 1 | 0 | 4.091015  | 1.296231  | -1.296307 |
| 9  | 1 | 0 | 2.574663  | -2.933490 | 0.779848  |
| 10 | 1 | 0 | 4.957033  | -2.587380 | 0.320728  |
| 11 | 7 | 0 | 0.587947  | -1.213783 | 0.253172  |
| 12 | 6 | 0 | -0.355095 | -0.336048 | -0.423817 |
| 13 | 1 | 0 | -0.181417 | -0.429081 | -1.503493 |
| 14 | 6 | 0 | 0.173015  | -2.224675 | 1.216708  |
| 15 | 1 | 0 | -0.863070 | -2.057686 | 1.499032  |
| 16 | 1 | 0 | 0.256198  | -3.239384 | 0.806792  |
| 17 | 1 | 0 | 0.788168  | -2.162177 | 2.120008  |
| 18 | 6 | 0 | -1.831022 | -0.676432 | -0.249311 |
| 19 | 6 | 0 | -2.381596 | -1.541810 | -1.208583 |
| 20 | 6 | 0 | -2.661816 | -0.192926 | 0.771724  |
| 21 | 6 | 0 | -3.719990 | -1.925708 | -1.147215 |
| 22 | 1 | 0 | -1.753364 | -1.918136 | -2.011400 |
| 23 | 6 | 0 | -4.005916 | -0.568824 | 0.825856  |
| 24 | 1 | 0 | -2.269592 | 0.472297  | 1.528617  |
| 25 | 6 | 0 | -4.538736 | -1.436670 | -0.127506 |
| 26 | 1 | 0 | -4.122588 | -2.597385 | -1.899030 |
| 27 | 1 | 0 | -4.634918 | -0.180358 | 1.620938  |
| 28 | 1 | 0 | -5.583853 | -1.726719 | -0.078993 |
| 29 | 6 | 0 | 1.441493  | 1.319675  | -0.927810 |
| 30 | 6 | 0 | 0.117068  | 1.149531  | -0.186373 |
| 31 | 1 | 0 | 1.882622  | 2.285362  | -0.672831 |
| 32 | 1 | 0 | 1.190613  | 1.345401  | -1.992223 |
| 33 | 7 | 0 | 0.312407  | 1.538187  | 1.292153  |
| 34 | 8 | 0 | -0.131737 | 0.798775  | 2.160458  |
| 35 | 8 | 0 | 0.921641  | 2.579354  | 1.499197  |
| 36 | 7 | 0 | -0.925486 | 2.107829  | -0.723627 |
| 37 | 8 | 0 | -1.569888 | 2.786137  | 0.069282  |
| 38 | 8 | 0 | -1.085094 | 2.082719  | -1.940079 |

1201aab\_Ph\_NMeBn\_CHC\_NO2\_H\_B3lyp631pd\_PCMdms0.log

Standard orientation:

| Center<br>Number | Atomic<br>Number | Atomic<br>Type | Coordinates (Angstroms) |           |           |
|------------------|------------------|----------------|-------------------------|-----------|-----------|
|                  |                  |                | X                       | Y         | Z         |
| 1                | 6                | 0              | 4.436755                | -0.366993 | 0.202385  |
| 2                | 6                | 0              | 3.414184                | 0.569233  | 0.179020  |
| 3                | 6                | 0              | 2.067298                | 0.189561  | 0.000437  |
| 4                | 6                | 0              | 1.743793                | -1.197859 | -0.111401 |
| 5                | 6                | 0              | 2.799789                | -2.128471 | -0.112812 |
| 6                | 6                | 0              | 4.121215                | -1.720251 | 0.039511  |
| 7                | 1                | 0              | 5.467262                | -0.049859 | 0.321593  |
| 8                | 1                | 0              | 3.657076                | 1.624649  | 0.245736  |
| 9                | 1                | 0              | 2.585826                | -3.185859 | -0.203358 |
| 10               | 1                | 0              | 4.909189                | -2.467496 | 0.045683  |
| 11               | 7                | 0              | 0.402521                | -1.609084 | -0.241627 |
| 12               | 6                | 0              | -0.520227               | -1.277033 | 0.857682  |
| 13               | 1                | 0              | -0.134933               | -0.397177 | 1.379700  |
| 14               | 1                | 0              | -0.519479               | -2.092118 | 1.599963  |
| 15               | 6                | 0              | 0.167136                | -2.954845 | -0.765257 |
| 16               | 1                | 0              | -0.888406               | -3.044873 | -1.028455 |
| 17               | 1                | 0              | 0.759536                | -3.116497 | -1.667750 |
| 18               | 1                | 0              | 0.402392                | -3.745379 | -0.035940 |
| 19               | 6                | 0              | -1.952897               | -1.009897 | 0.422948  |
| 20               | 6                | 0              | -2.978342               | -1.116153 | 1.373191  |
| 21               | 6                | 0              | -2.283070               | -0.620101 | -0.880292 |
| 22               | 6                | 0              | -4.299501               | -0.824705 | 1.033999  |
| 23               | 1                | 0              | -2.738896               | -1.428780 | 2.386854  |
| 24               | 6                | 0              | -3.607137               | -0.334623 | -1.224511 |
| 25               | 1                | 0              | -1.501058               | -0.555290 | -1.630374 |
| 26               | 6                | 0              | -4.619084               | -0.431979 | -0.268724 |
| 27               | 1                | 0              | -5.080146               | -0.910878 | 1.784283  |
| 28               | 1                | 0              | -3.845281               | -0.038014 | -2.241938 |
| 29               | 1                | 0              | -5.648034               | -0.210601 | -0.536135 |
| 30               | 6                | 0              | 1.033697                | 1.194382  | -0.175697 |
| 31               | 6                | 0              | 1.098820                | 2.479469  | 0.224193  |
| 32               | 1                | 0              | 0.129516                | 0.888248  | -0.692785 |
| 33               | 7                | 0              | 0.035971                | 3.396274  | -0.078657 |
| 34               | 8                | 0              | 0.158068                | 4.548946  | 0.364959  |

|    |   |   |           |          |           |
|----|---|---|-----------|----------|-----------|
| 35 | 8 | 0 | -0.938920 | 3.022984 | -0.745967 |
| 36 | 1 | 0 | 1.888239  | 2.945744 | 0.794948  |

1202dab\_Ph\_NMeBn\_CHC\_NO2\_H\_ZWion\_B3lyp631pd\_PCMDmso\_TS\_CH.log

Standard orientation:

| Center<br>Number | Atomic<br>Number | Atomic<br>Type | Coordinates (Angstroms) |           |           |
|------------------|------------------|----------------|-------------------------|-----------|-----------|
|                  |                  |                | X                       | Y         | Z         |
| 1                | 6                | 0              | 4.351974                | -0.778555 | 0.188136  |
| 2                | 6                | 0              | 3.404187                | 0.220502  | -0.046696 |
| 3                | 6                | 0              | 2.038623                | -0.072063 | -0.101389 |
| 4                | 6                | 0              | 1.640673                | -1.415414 | 0.075166  |
| 5                | 6                | 0              | 2.583252                | -2.416002 | 0.314553  |
| 6                | 6                | 0              | 3.941061                | -2.098736 | 0.366696  |
| 7                | 1                | 0              | 5.405007                | -0.520734 | 0.239351  |
| 8                | 1                | 0              | 3.720132                | 1.249310  | -0.190612 |
| 9                | 1                | 0              | 2.251738                | -3.437267 | 0.471580  |
| 10               | 1                | 0              | 4.668953                | -2.880632 | 0.557569  |
| 11               | 7                | 0              | 0.244828                | -1.740131 | -0.019646 |
| 12               | 6                | 0              | -0.579582               | -0.781746 | 0.517528  |
| 13               | 1                | 0              | -0.253344               | -0.470307 | 1.512471  |
| 14               | 6                | 0              | -0.156697               | -2.641310 | -1.105176 |
| 15               | 1                | 0              | -1.178569               | -2.980051 | -0.938582 |
| 16               | 1                | 0              | -0.083600               | -2.165505 | -2.090521 |
| 17               | 1                | 0              | 0.503644                | -3.508711 | -1.093642 |
| 18               | 6                | 0              | -2.036535               | -0.701824 | 0.310317  |
| 19               | 6                | 0              | -2.841147               | -0.480313 | 1.444450  |
| 20               | 6                | 0              | -2.650663               | -0.758013 | -0.956410 |
| 21               | 6                | 0              | -4.223326               | -0.359281 | 1.322105  |
| 22               | 1                | 0              | -2.377547               | -0.416259 | 2.424346  |
| 23               | 6                | 0              | -4.031453               | -0.627491 | -1.074087 |
| 24               | 1                | 0              | -2.050318               | -0.874619 | -1.851098 |
| 25               | 6                | 0              | -4.822269               | -0.435168 | 0.062869  |
| 26               | 1                | 0              | -4.830536               | -0.201597 | 2.207714  |
| 27               | 1                | 0              | -4.491198               | -0.667638 | -2.056385 |
| 28               | 1                | 0              | -5.898725               | -0.335096 | -0.034938 |
| 29               | 6                | 0              | 1.029592                | 1.015089  | -0.391414 |
| 30               | 6                | 0              | 1.178817                | 2.248817  | 0.301656  |
| 31               | 1                | 0              | 0.789752                | 1.145815  | -1.452251 |
| 32               | 1                | 0              | -0.046030               | 0.453017  | -0.048345 |
| 33               | 7                | 0              | 0.525269                | 3.377834  | -0.131704 |
| 34               | 8                | 0              | -0.207953               | 3.329688  | -1.161499 |
| 35               | 8                | 0              | 0.685549                | 4.455070  | 0.510477  |
| 36               | 1                | 0              | 1.700141                | 2.357335  | 1.241153  |

1203aab\_Ph\_NMeBn\_CHC\_NO2\_H\_ZWion\_B3lyp631pd\_PCMDmso.log

Standard orientation:

| Center<br>Number | Atomic<br>Number | Atomic<br>Type | Coordinates (Angstroms) |           |           |
|------------------|------------------|----------------|-------------------------|-----------|-----------|
|                  |                  |                | X                       | Y         | Z         |
| 1                | 6                | 0              | 2.883251                | 2.539213  | -0.726573 |
| 2                | 6                | 0              | 2.913014                | 1.245515  | -0.210903 |
| 3                | 6                | 0              | 1.742166                | 0.592260  | 0.207541  |
| 4                | 6                | 0              | 0.544547                | 1.311578  | 0.083086  |
| 5                | 6                | 0              | 0.492876                | 2.606732  | -0.444630 |
| 6                | 6                | 0              | 1.671070                | 3.223729  | -0.853721 |
| 7                | 1                | 0              | 3.808691                | 3.016254  | -1.035125 |
| 8                | 1                | 0              | 3.848235                | 0.702717  | -0.109983 |
| 9                | 1                | 0              | -0.460599               | 3.120233  | -0.516405 |
| 10               | 1                | 0              | 1.641424                | 4.229060  | -1.260661 |
| 11               | 7                | 0              | -0.716140               | 0.727032  | 0.531750  |
| 12               | 6                | 0              | -1.590185               | 0.367183  | -0.369915 |
| 13               | 1                | 0              | -1.212587               | 0.426297  | -1.386970 |
| 14               | 6                | 0              | -0.920325               | 0.657563  | 1.991669  |
| 15               | 1                | 0              | -1.426709               | 1.562467  | 2.336248  |
| 16               | 1                | 0              | -1.502555               | -0.226938 | 2.246698  |
| 17               | 1                | 0              | 0.058120                | 0.602251  | 2.463213  |
| 18               | 6                | 0              | -2.945860               | -0.113090 | -0.230816 |
| 19               | 6                | 0              | -3.460171               | -0.778040 | -1.368964 |
| 20               | 6                | 0              | -3.781393               | 0.060094  | 0.897031  |

|    |   |   |           |           |           |
|----|---|---|-----------|-----------|-----------|
| 21 | 6 | 0 | -4.747776 | -1.297849 | -1.363560 |
| 22 | 1 | 0 | -2.834310 | -0.892137 | -2.248415 |
| 23 | 6 | 0 | -5.075687 | -0.444281 | 0.883306  |
| 24 | 1 | 0 | -3.448505 | 0.617214  | 1.761230  |
| 25 | 6 | 0 | -5.556349 | -1.132724 | -0.235801 |
| 26 | 1 | 0 | -5.124753 | -1.819008 | -2.236694 |
| 27 | 1 | 0 | -5.715686 | -0.296393 | 1.746322  |
| 28 | 1 | 0 | -6.567034 | -1.528129 | -0.232281 |
| 29 | 6 | 0 | 1.824830  | -0.840843 | 0.730040  |
| 30 | 6 | 0 | 2.560800  | -1.791060 | -0.163928 |
| 31 | 1 | 0 | 2.333056  | -0.819906 | 1.701960  |
| 32 | 1 | 0 | 0.815233  | -1.230348 | 0.896227  |
| 33 | 7 | 0 | 3.871765  | -1.992973 | -0.039230 |
| 34 | 8 | 0 | 4.563748  | -1.326413 | 0.832859  |
| 35 | 8 | 0 | 4.474457  | -2.857577 | -0.780788 |
| 36 | 1 | 0 | 2.064111  | -2.366018 | -0.932750 |

1211aaa\_Ph\_NMeBn\_CHC\_NO2\_H\_product\_B3lyp631pd\_PCMdms0.log

Standard orientation:

| Center<br>Number | Atomic<br>Number | Atomic<br>Type | Coordinates (Angstroms) |           |           |
|------------------|------------------|----------------|-------------------------|-----------|-----------|
|                  |                  |                | X                       | Y         | Z         |
| 1                | 6                | 0              | -4.715686               | -0.058696 | -0.430343 |
| 2                | 6                | 0              | -3.747253               | 0.940683  | -0.340949 |
| 3                | 6                | 0              | -2.414117               | 0.647608  | -0.047676 |
| 4                | 6                | 0              | -2.011388               | -0.698122 | 0.132818  |
| 5                | 6                | 0              | -2.999556               | -1.703339 | 0.045620  |
| 6                | 6                | 0              | -4.326956               | -1.383596 | -0.230035 |
| 7                | 1                | 0              | -5.748325               | 0.192455  | -0.649827 |
| 8                | 1                | 0              | -4.026779               | 1.981238  | -0.487324 |
| 9                | 1                | 0              | -2.730768               | -2.742934 | 0.182774  |
| 10               | 1                | 0              | -5.058782               | -2.184108 | -0.291638 |
| 11               | 7                | 0              | -0.672932               | -1.039513 | 0.365011  |
| 12               | 6                | 0              | 0.350554                | -0.005795 | 0.562082  |
| 13               | 1                | 0              | 0.380992                | 0.326498  | 1.610914  |
| 14               | 6                | 0              | -0.404158               | -2.335011 | 0.991032  |
| 15               | 1                | 0              | 0.642551                | -2.384143 | 1.284982  |
| 16               | 1                | 0              | -1.024141               | -2.486434 | 1.884397  |
| 17               | 1                | 0              | -0.589773               | -3.160918 | 0.296732  |
| 18               | 6                | 0              | 1.741220                | -0.500985 | 0.175663  |
| 19               | 6                | 0              | 2.824147                | -0.293064 | 1.036995  |
| 20               | 6                | 0              | 1.964005                | -1.123927 | -1.060892 |
| 21               | 6                | 0              | 4.110748                | -0.696677 | 0.670082  |
| 22               | 1                | 0              | 2.661087                | 0.185391  | 1.998805  |
| 23               | 6                | 0              | 3.246693                | -1.529001 | -1.426820 |
| 24               | 1                | 0              | 1.126165                | -1.302981 | -1.728674 |
| 25               | 6                | 0              | 4.324528                | -1.314814 | -0.562197 |
| 26               | 1                | 0              | 4.941431                | -0.531195 | 1.349513  |
| 27               | 1                | 0              | 3.406143                | -2.012901 | -2.385821 |
| 28               | 1                | 0              | 5.323104                | -1.631817 | -0.847590 |
| 29               | 6                | 0              | -1.406034               | 1.761055  | 0.097338  |
| 30               | 6                | 0              | -0.028027               | 1.233283  | -0.285644 |
| 31               | 1                | 0              | -1.676100               | 2.610557  | -0.537519 |
| 32               | 1                | 0              | -1.361838               | 2.126078  | 1.130353  |
| 33               | 7                | 0              | 1.005988                | 2.308362  | -0.060460 |
| 34               | 8                | 0              | 1.650919                | 2.698290  | -1.030234 |
| 35               | 8                | 0              | 1.138550                | 2.738116  | 1.085821  |
| 36               | 1                | 0              | 0.035566                | 1.004404  | -1.349092 |

1301aab\_Ph\_NMeBn\_CHC\_CF3\_CF3\_B3lyp631pd\_PCMdms0.log

Standard orientation:

| Center<br>Number | Atomic<br>Number | Atomic<br>Type | Coordinates (Angstroms) |          |           |
|------------------|------------------|----------------|-------------------------|----------|-----------|
|                  |                  |                | X                       | Y        | Z         |
| 1                | 6                | 0              | -3.317126               | 2.809418 | -0.202768 |
| 2                | 6                | 0              | -2.796239               | 1.523112 | -0.285970 |
| 3                | 6                | 0              | -1.408455               | 1.298088 | -0.316169 |
| 4                | 6                | 0              | -0.519187               | 2.408002 | -0.230626 |
| 5                | 6                | 0              | -1.064741               | 3.701177 | -0.158979 |
| 6                | 6                | 0              | -2.443823               | 3.897892 | -0.148709 |

|    |   |   |           |           |           |
|----|---|---|-----------|-----------|-----------|
| 7  | 1 | 0 | -4.391289 | 2.962351  | -0.201527 |
| 8  | 1 | 0 | -3.468966 | 0.679863  | -0.384160 |
| 9  | 1 | 0 | -0.409616 | 4.560867  | -0.090978 |
| 10 | 1 | 0 | -2.835665 | 4.908894  | -0.087333 |
| 11 | 7 | 0 | 0.876606  | 2.184898  | -0.245247 |
| 12 | 6 | 0 | 1.433414  | 1.405946  | 0.874541  |
| 13 | 1 | 0 | 0.656095  | 0.731899  | 1.244270  |
| 14 | 1 | 0 | 1.674716  | 2.079157  | 1.713818  |
| 15 | 6 | 0 | 1.723163  | 3.326031  | -0.593052 |
| 16 | 1 | 0 | 2.733010  | 2.962505  | -0.793059 |
| 17 | 1 | 0 | 1.347649  | 3.809942  | -1.496722 |
| 18 | 1 | 0 | 1.787087  | 4.074221  | 0.212483  |
| 19 | 6 | 0 | 2.669280  | 0.590322  | 0.528138  |
| 20 | 6 | 0 | 3.542402  | 0.215817  | 1.559096  |
| 21 | 6 | 0 | 2.945021  | 0.156999  | -0.774274 |
| 22 | 6 | 0 | 4.654793  | -0.584956 | 1.299146  |
| 23 | 1 | 0 | 3.348009  | 0.554160  | 2.574140  |
| 24 | 6 | 0 | 4.063217  | -0.638014 | -1.038887 |
| 25 | 1 | 0 | 2.291325  | 0.459991  | -1.585793 |
| 26 | 6 | 0 | 4.919495  | -1.015742 | -0.003524 |
| 27 | 1 | 0 | 5.318491  | -0.865805 | 2.111818  |
| 28 | 1 | 0 | 4.264064  | -0.960218 | -2.056631 |
| 29 | 1 | 0 | 5.788324  | -1.633855 | -0.209381 |
| 30 | 6 | 0 | -0.849550 | -0.022988 | -0.607153 |
| 31 | 6 | 0 | -1.232915 | -1.255230 | -0.217594 |
| 32 | 1 | 0 | 0.020134  | 0.012062  | -1.257502 |
| 33 | 6 | 0 | -2.327968 | -1.550043 | 0.774591  |
| 34 | 6 | 0 | -0.531418 | -2.466868 | -0.774557 |
| 35 | 9 | 0 | 0.210550  | -3.110821 | 0.156720  |
| 36 | 9 | 0 | -1.420706 | -3.371043 | -1.254788 |
| 37 | 9 | 0 | -2.146180 | -2.747711 | 1.373167  |
| 38 | 9 | 0 | -3.556704 | -1.595002 | 0.193888  |
| 39 | 9 | 0 | -2.391779 | -0.624966 | 1.754026  |
| 40 | 9 | 0 | 0.303064  | -2.153136 | -1.787037 |

1302dab\_Ph\_NMeBn\_CHC\_CF3\_CF3\_ZW\_INT\_B3lyp631pd\_PCMDmso\_TS\_CH\_f.log

Standard orientation:

| Center Number | Atomic Number | Atomic Type | Coordinates (Angstroms) |           |           |
|---------------|---------------|-------------|-------------------------|-----------|-----------|
|               |               |             | X                       | Y         | Z         |
| 1             | 6             | 0           | -2.624653               | 3.082565  | 0.796541  |
| 2             | 6             | 0           | -2.529940               | 1.930606  | 0.023311  |
| 3             | 6             | 0           | -1.291308               | 1.408883  | -0.393271 |
| 4             | 6             | 0           | -0.154162               | 2.119024  | 0.018240  |
| 5             | 6             | 0           | -0.226986               | 3.279374  | 0.798602  |
| 6             | 6             | 0           | -1.468633               | 3.763432  | 1.192747  |
| 7             | 1             | 0           | -3.601300               | 3.454168  | 1.091766  |
| 8             | 1             | 0           | -3.431845               | 1.405035  | -0.269909 |
| 9             | 1             | 0           | 0.686410                | 3.784362  | 1.097455  |
| 10            | 1             | 0           | -1.533025               | 4.657743  | 1.803639  |
| 11            | 7             | 0           | 1.185611                | 1.685792  | -0.378881 |
| 12            | 6             | 0           | 1.737778                | 0.695069  | 0.268143  |
| 13            | 1             | 0           | 1.122366                | 0.302898  | 1.071947  |
| 14            | 6             | 0           | 1.823363                | 2.461615  | -1.459966 |
| 15            | 1             | 0           | 1.671385                | 1.958621  | -2.418241 |
| 16            | 1             | 0           | 1.345328                | 3.438089  | -1.494573 |
| 17            | 1             | 0           | 2.887052                | 2.581644  | -1.258288 |
| 18            | 6             | 0           | 3.020681                | 0.051592  | 0.086709  |
| 19            | 6             | 0           | 3.436735                | -0.744868 | 1.179019  |
| 20            | 6             | 0           | 3.841754                | 0.116608  | -1.062052 |
| 21            | 6             | 0           | 4.655563                | -1.409597 | 1.149161  |
| 22            | 1             | 0           | 2.795375                | -0.828501 | 2.050427  |
| 23            | 6             | 0           | 5.050114                | -0.569528 | -1.090640 |
| 24            | 1             | 0           | 3.532461                | 0.660047  | -1.943480 |
| 25            | 6             | 0           | 5.465612                | -1.320163 | 0.013928  |
| 26            | 1             | 0           | 4.968363                | -2.004907 | 2.000088  |
| 27            | 1             | 0           | 5.669092                | -0.523755 | -1.980142 |
| 28            | 1             | 0           | 6.414213                | -1.846617 | -0.017299 |
| 29            | 6             | 0           | -1.255672               | 0.141938  | -1.253586 |
| 30            | 6             | 0           | -1.711719               | -1.144887 | -0.587826 |
| 31            | 1             | 0           | -1.892177               | 0.328786  | -2.123827 |
| 32            | 6             | 0           | -0.824077               | -1.729336 | 0.369207  |
| 33            | 6             | 0           | -3.124589               | -1.424295 | -0.477071 |



|    |   |   |           |           |           |
|----|---|---|-----------|-----------|-----------|
| 34 | 9 | 0 | -3.465906 | -2.757269 | -0.510835 |
| 35 | 9 | 0 | -3.793369 | -0.992422 | 0.692835  |
| 36 | 9 | 0 | -1.210474 | -2.936366 | 0.860801  |
| 37 | 9 | 0 | -0.553242 | -0.978476 | 1.573634  |
| 38 | 9 | 0 | 0.470886  | -1.888445 | -0.106661 |
| 39 | 9 | 0 | -3.848628 | -0.827207 | -1.480081 |
| 40 | 1 | 0 | -0.245545 | 0.005315  | -1.651807 |

1303aab\_Ph\_NMeBn\_CHC\_CF3\_CF3\_ZW\_INT\_B3lyp631pd\_PCMDmso.log

Standard orientation:

| Center<br>Number | Atomic<br>Number | Atomic<br>Type | Coordinates (Angstroms) |           |           |
|------------------|------------------|----------------|-------------------------|-----------|-----------|
|                  |                  |                | X                       | Y         | Z         |
| 1                | 6                | 0              | -3.314718               | 2.812457  | -0.202179 |
| 2                | 6                | 0              | -2.795290               | 1.525563  | -0.285601 |
| 3                | 6                | 0              | -1.407781               | 1.299043  | -0.316443 |
| 4                | 6                | 0              | -0.517263               | 2.407974  | -0.231280 |
| 5                | 6                | 0              | -1.061330               | 3.701737  | -0.159392 |
| 6                | 6                | 0              | -2.440202               | 3.899968  | -0.148525 |
| 7                | 1                | 0              | -4.388712               | 2.966565  | -0.200441 |
| 8                | 1                | 0              | -3.468973               | 0.683029  | -0.383416 |
| 9                | 1                | 0              | -0.405218               | 4.560705  | -0.091729 |
| 10               | 1                | 0              | -2.830903               | 4.911402  | -0.086998 |
| 11               | 7                | 0              | 0.878285                | 2.183173  | -0.246463 |
| 12               | 6                | 0              | 1.434309                | 1.404102  | 0.873692  |
| 13               | 1                | 0              | 1.675166                | 2.077185  | 1.713203  |
| 14               | 6                | 0              | 1.725968                | 3.323365  | -0.594652 |
| 15               | 1                | 0              | 2.735355                | 2.958738  | -0.794947 |
| 16               | 1                | 0              | 1.350647                | 3.807564  | -1.498250 |
| 17               | 1                | 0              | 1.790945                | 4.071589  | 0.210769  |
| 18               | 6                | 0              | 2.670222                | 0.588332  | 0.527905  |
| 19               | 6                | 0              | 3.543995                | 0.215512  | 1.558892  |
| 20               | 6                | 0              | 2.945245                | 0.153065  | -0.774035 |
| 21               | 6                | 0              | 4.656339                | -0.585539 | 1.299494  |
| 22               | 1                | 0              | 3.350178                | 0.555381  | 2.573534  |
| 23               | 6                | 0              | 4.063369                | -0.642193 | -1.038105 |
| 24               | 1                | 0              | 2.291073                | 0.454793  | -1.585640 |
| 25               | 6                | 0              | 4.920312                | -1.018262 | -0.002662 |
| 26               | 1                | 0              | 5.320560                | -0.865048 | 2.112201  |
| 27               | 1                | 0              | 4.263662                | -0.965923 | -2.055475 |
| 28               | 1                | 0              | 5.789087                | -1.636586 | -0.208110 |
| 29               | 6                | 0              | -0.850367               | -0.022617 | -0.607673 |
| 30               | 6                | 0              | -1.234487               | -1.254436 | -0.217543 |
| 31               | 1                | 0              | 0.018852                | 0.011547  | -1.258695 |
| 32               | 6                | 0              | -2.329183               | -1.548007 | 0.775388  |
| 33               | 6                | 0              | -0.534545               | -2.466817 | -0.774848 |
| 34               | 9                | 0              | 0.207261                | -3.111472 | 0.156020  |
| 35               | 9                | 0              | -1.425011               | -3.370085 | -1.254590 |
| 36               | 9                | 0              | -2.148156               | -2.745737 | 1.374132  |
| 37               | 9                | 0              | -3.558311               | -1.591939 | 0.195504  |
| 38               | 9                | 0              | -2.391480               | -0.622671 | 1.754715  |
| 39               | 9                | 0              | 0.299710                | -2.153958 | -1.787796 |
| 40               | 1                | 0              | 0.656619                | 0.730112  | 1.242770  |

1311aaa\_Ph\_NMeBn\_CHC\_CF3\_CF3\_product\_B3lyp631pd\_PCMDmso.log

Standard orientation:

| Center<br>Number | Atomic<br>Number | Atomic<br>Type | Coordinates (Angstroms) |           |           |
|------------------|------------------|----------------|-------------------------|-----------|-----------|
|                  |                  |                | X                       | Y         | Z         |
| 1                | 6                | 0              | -4.374640               | 0.639936  | 0.770628  |
| 2                | 6                | 0              | -3.532393               | -0.467563 | 0.617735  |
| 3                | 6                | 0              | -2.350810               | -0.362096 | -0.107884 |
| 4                | 6                | 0              | -1.969871               | 0.874762  | -0.667917 |
| 5                | 6                | 0              | -2.815995               | 1.985855  | -0.518317 |
| 6                | 6                | 0              | -4.012925               | 1.856561  | 0.192216  |
| 7                | 1                | 0              | -5.301415               | 0.548634  | 1.328080  |
| 8                | 1                | 0              | -3.808201               | -1.427691 | 1.046616  |
| 9                | 1                | 0              | -2.545194               | 2.944712  | -0.945573 |
| 10               | 1                | 0              | -4.659107               | 2.723143  | 0.300219  |
| 11               | 7                | 0              | -0.786582               | 0.890334  | -1.412601 |

|    |   |   |           |           |           |
|----|---|---|-----------|-----------|-----------|
| 12 | 6 | 0 | 0.420654  | 0.174847  | -0.954494 |
| 13 | 1 | 0 | 0.901665  | -0.174330 | -1.873063 |
| 14 | 6 | 0 | -0.529875 | 2.003350  | -2.314970 |
| 15 | 1 | 0 | 0.271105  | 1.723471  | -3.004928 |
| 16 | 1 | 0 | -1.429739 | 2.206213  | -2.901129 |
| 17 | 1 | 0 | -0.227116 | 2.929065  | -1.805934 |
| 18 | 6 | 0 | 1.443321  | 1.109623  | -0.288531 |
| 19 | 6 | 0 | 2.801441  | 0.979813  | -0.607421 |
| 20 | 6 | 0 | 1.052115  | 2.146713  | 0.569566  |
| 21 | 6 | 0 | 3.751507  | 1.842466  | -0.058921 |
| 22 | 1 | 0 | 3.120404  | 0.195922  | -1.287375 |
| 23 | 6 | 0 | 1.999550  | 3.014539  | 1.113739  |
| 24 | 1 | 0 | 0.003396  | 2.282293  | 0.809537  |
| 25 | 6 | 0 | 3.353476  | 2.862795  | 0.806477  |
| 26 | 1 | 0 | 4.799697  | 1.722291  | -0.316462 |
| 27 | 1 | 0 | 1.677445  | 3.813368  | 1.775292  |
| 28 | 1 | 0 | 4.089450  | 3.539964  | 1.229517  |
| 29 | 6 | 0 | -1.442836 | -1.518685 | -0.409543 |
| 30 | 6 | 0 | 0.050270  | -1.153421 | -0.162749 |
| 31 | 1 | 0 | -1.708441 | -2.405197 | 0.167676  |
| 32 | 1 | 0 | -1.530082 | -1.774865 | -1.471122 |
| 33 | 6 | 0 | 0.289375  | -1.072427 | 1.365706  |
| 34 | 6 | 0 | 0.913326  | -2.303629 | -0.735269 |
| 35 | 9 | 0 | 1.593429  | -0.976717 | 1.691541  |
| 36 | 9 | 0 | -0.184224 | -2.173177 | 1.993322  |
| 37 | 9 | 0 | -0.343879 | -0.016087 | 1.913003  |
| 38 | 9 | 0 | 0.653626  | -3.479349 | -0.129700 |
| 39 | 9 | 0 | 2.238264  | -2.076373 | -0.617623 |
| 40 | 9 | 0 | 0.662570  | -2.473848 | -2.053149 |

-----

1313aab\_Ph\_NMeBn\_CHC\_CF3\_CF3\_ZWion\_B3lyp631pd\_PCMdmsol.log

Standard orientation:

| Center<br>Number | Atomic<br>Number | Atomic<br>Type | Coordinates (Angstroms) |           |           |
|------------------|------------------|----------------|-------------------------|-----------|-----------|
|                  |                  |                | X                       | Y         | Z         |
| 1                | 6                | 0              | -2.143516               | 3.511717  | 0.841303  |
| 2                | 6                | 0              | -2.246451               | 2.289302  | 0.187038  |
| 3                | 6                | 0              | -1.115706               | 1.586766  | -0.263837 |
| 4                | 6                | 0              | 0.126524                | 2.178902  | -0.003344 |
| 5                | 6                | 0              | 0.255055                | 3.403897  | 0.663236  |
| 6                | 6                | 0              | -0.886119               | 4.074965  | 1.086743  |
| 7                | 1                | 0              | -3.042081               | 4.028216  | 1.165137  |
| 8                | 1                | 0              | -3.218738               | 1.840469  | 0.010613  |
| 9                | 1                | 0              | 1.242398                | 3.812144  | 0.854429  |
| 10               | 1                | 0              | -0.795071               | 5.022106  | 1.608121  |
| 11               | 7                | 0              | 1.371061                | 1.547153  | -0.442391 |
| 12               | 6                | 0              | 1.831959                | 0.524651  | 0.223481  |
| 13               | 1                | 0              | 1.158077                | 0.159740  | 0.994105  |
| 14               | 6                | 0              | 2.006986                | 2.151246  | -1.629017 |
| 15               | 1                | 0              | 2.621372                | 3.005450  | -1.335002 |
| 16               | 1                | 0              | 2.616332                | 1.409158  | -2.141967 |
| 17               | 1                | 0              | 1.210536                | 2.495729  | -2.286972 |
| 18               | 6                | 0              | 3.078926                | -0.194449 | 0.059858  |
| 19               | 6                | 0              | 3.074789                | -1.532236 | 0.516254  |
| 20               | 6                | 0              | 4.276523                | 0.361486  | -0.441683 |
| 21               | 6                | 0              | 4.224988                | -2.306392 | 0.425254  |
| 22               | 1                | 0              | 2.154444                | -1.956037 | 0.902253  |
| 23               | 6                | 0              | 5.427611                | -0.415423 | -0.502917 |
| 24               | 1                | 0              | 4.328082                | 1.402374  | -0.732953 |
| 25               | 6                | 0              | 5.401745                | -1.749294 | -0.083228 |
| 26               | 1                | 0              | 4.209023                | -3.338372 | 0.758952  |
| 27               | 1                | 0              | 6.349227                | 0.021197  | -0.872414 |
| 28               | 1                | 0              | 6.303784                | -2.350178 | -0.141123 |
| 29               | 6                | 0              | -1.311948               | 0.259985  | -0.994849 |
| 30               | 6                | 0              | -2.012586               | -0.803889 | -0.172002 |
| 31               | 1                | 0              | -1.915598               | 0.474319  | -1.882589 |
| 32               | 1                | 0              | -0.348093               | -0.093926 | -1.379153 |
| 33               | 6                | 0              | -1.195077               | -1.584806 | 0.699264  |
| 34               | 6                | 0              | -3.309321               | -1.267349 | -0.588479 |
| 35               | 9                | 0              | -1.805640               | -2.626176 | 1.313177  |
| 36               | 9                | 0              | -0.030951               | -2.151126 | 0.109612  |
| 37               | 9                | 0              | -0.580672               | -0.852936 | 1.746062  |
| 38               | 9                | 0              | -4.090270               | -1.805495 | 0.402050  |

|    |   |   |           |           |           |
|----|---|---|-----------|-----------|-----------|
| 39 | 9 | 0 | -4.059751 | -0.258993 | -1.160405 |
| 40 | 9 | 0 | -3.363538 | -2.271599 | -1.584179 |

1401\_biphenyIO\_b3lyp631dp\_PCMdmsol.log

Standard orientation:

| Center<br>Number | Atomic<br>Number | Atomic<br>Type | Coordinates (Angstroms) |           |           |
|------------------|------------------|----------------|-------------------------|-----------|-----------|
|                  |                  |                | X                       | Y         | Z         |
| 1                | 6                | 0              | -1.973223               | 2.114626  | -2.424477 |
| 2                | 6                | 0              | -0.597257               | 2.363676  | -2.339110 |
| 3                | 6                | 0              | 0.161471                | 1.835558  | -1.299099 |
| 4                | 6                | 0              | -0.454793               | 1.043983  | -0.326723 |
| 5                | 6                | 0              | -1.854160               | 0.771747  | -0.388746 |
| 6                | 6                | 0              | -2.587290               | 1.329760  | -1.462397 |
| 7                | 1                | 0              | -2.556906               | 2.535707  | -3.235530 |
| 8                | 1                | 0              | -0.109030               | 2.975160  | -3.091575 |
| 9                | 1                | 0              | 1.224503                | 2.030961  | -1.236866 |
| 10               | 1                | 0              | -3.652709               | 1.152854  | -1.528780 |
| 11               | 8                | 0              | 0.227808                | 0.473670  | 0.708000  |
| 12               | 6                | 0              | 1.571616                | 0.816343  | 0.929647  |
| 13               | 6                | 0              | 2.608253                | 0.019439  | 0.381091  |
| 14               | 6                | 0              | 1.825778                | 1.925951  | 1.727669  |
| 15               | 6                | 0              | 3.926507                | 0.466554  | 0.645135  |
| 16               | 6                | 0              | 3.135696                | 2.326862  | 1.988753  |
| 17               | 1                | 0              | 0.977993                | 2.475193  | 2.125421  |
| 18               | 6                | 0              | 4.179873                | 1.591353  | 1.425901  |
| 19               | 1                | 0              | 4.763533                | -0.086547 | 0.237985  |
| 20               | 1                | 0              | 3.331098                | 3.196017  | 2.607420  |
| 21               | 1                | 0              | 5.210469                | 1.885041  | 1.602924  |
| 22               | 6                | 0              | 3.480092                | -1.805176 | -1.048745 |
| 23               | 6                | 0              | 1.199521                | -1.988081 | -0.230152 |
| 24               | 6                | 0              | 2.793708                | -2.982778 | -1.742758 |
| 25               | 1                | 0              | 4.009260                | -1.143630 | -1.743286 |
| 26               | 1                | 0              | 4.213338                | -2.170826 | -0.311778 |
| 27               | 6                | 0              | 1.689403                | -3.351980 | -0.742940 |
| 28               | 1                | 0              | 0.883599                | -2.028316 | 0.816298  |
| 29               | 1                | 0              | 3.486383                | -3.802866 | -1.947029 |
| 30               | 1                | 0              | 2.357935                | -2.658391 | -2.694191 |
| 31               | 1                | 0              | 0.880125                | -3.938845 | -1.184803 |
| 32               | 1                | 0              | 2.114706                | -3.933612 | 0.082372  |
| 33               | 6                | 0              | -2.427956               | -0.027368 | 0.665244  |
| 34               | 6                | 0              | -3.689635               | -0.543531 | 0.825407  |
| 35               | 1                | 0              | -1.742514               | -0.264253 | 1.472042  |
| 36               | 6                | 0              | -4.777072               | -0.423196 | -0.095327 |
| 37               | 7                | 0              | -5.686328               | -0.352983 | -0.819700 |
| 38               | 6                | 0              | -3.988359               | -1.296364 | 2.007196  |
| 39               | 7                | 0              | -4.239774               | -1.909533 | 2.964604  |
| 40               | 7                | 0              | 2.369599                | -1.095286 | -0.400106 |
| 41               | 1                | 0              | 0.348232                | -1.632662 | -0.821619 |

1404\_biphenyIO\_ZWINT\_b3lyp631dp\_PCMdmsol\_TS\_CH.log

Standard orientation:

| Center<br>Number | Atomic<br>Number | Atomic<br>Type | Coordinates (Angstroms) |           |           |
|------------------|------------------|----------------|-------------------------|-----------|-----------|
|                  |                  |                | X                       | Y         | Z         |
| 1                | 6                | 0              | 2.249048                | 3.273379  | -1.574628 |
| 2                | 6                | 0              | 1.031302                | 3.792279  | -1.132148 |
| 3                | 6                | 0              | 0.147107                | 2.998842  | -0.398408 |
| 4                | 6                | 0              | 0.496879                | 1.680621  | -0.109380 |
| 5                | 6                | 0              | 1.709111                | 1.130304  | -0.561232 |
| 6                | 6                | 0              | 2.575983                | 1.945667  | -1.297823 |
| 7                | 1                | 0              | 2.934607                | 3.893614  | -2.142729 |
| 8                | 1                | 0              | 0.762732                | 4.820512  | -1.353436 |
| 9                | 1                | 0              | -0.798052               | 3.403987  | -0.059311 |
| 10               | 1                | 0              | 3.509351                | 1.527159  | -1.663142 |
| 11               | 8                | 0              | -0.282879               | 0.826309  | 0.658487  |
| 12               | 6                | 0              | -1.655270               | 0.731485  | 0.523774  |
| 13               | 6                | 0              | -2.180655               | -0.435185 | -0.069023 |
| 14               | 6                | 0              | -2.507253               | 1.671142  | 1.102578  |
| 15               | 6                | 0              | -3.568747               | -0.625224 | -0.075043 |

|    |   |   |           |           |           |
|----|---|---|-----------|-----------|-----------|
| 16 | 6 | 0 | -3.888789 | 1.478351  | 1.071200  |
| 17 | 1 | 0 | -2.079300 | 2.529330  | 1.607976  |
| 18 | 6 | 0 | -4.417210 | 0.328540  | 0.483784  |
| 19 | 1 | 0 | -3.983710 | -1.517440 | -0.530095 |
| 20 | 1 | 0 | -4.544159 | 2.216135  | 1.521906  |
| 21 | 1 | 0 | -5.489835 | 0.167586  | 0.461695  |
| 22 | 6 | 0 | -1.559845 | -2.878784 | -0.372269 |
| 23 | 6 | 0 | -0.287801 | -1.206586 | -1.454126 |
| 24 | 6 | 0 | -0.322519 | -3.538787 | -0.998084 |
| 25 | 1 | 0 | -1.672566 | -3.067409 | 0.697617  |
| 26 | 1 | 0 | -2.480903 | -3.186537 | -0.879360 |
| 27 | 6 | 0 | 0.119369  | -2.525964 | -2.071495 |
| 28 | 1 | 0 | -0.299953 | -0.280377 | -2.026072 |
| 29 | 1 | 0 | -0.550151 | -4.522231 | -1.411980 |
| 30 | 1 | 0 | 0.464163  | -3.656886 | -0.247349 |
| 31 | 1 | 0 | 1.181070  | -2.576311 | -2.319958 |
| 32 | 1 | 0 | -0.447507 | -2.657272 | -3.002635 |
| 33 | 6 | 0 | 2.000322  | -0.327362 | -0.345812 |
| 34 | 6 | 0 | 2.362059  | -0.816223 | 0.974141  |
| 35 | 1 | 0 | 2.649855  | -0.731562 | -1.126713 |
| 36 | 6 | 0 | 2.113564  | -0.107413 | 2.166878  |
| 37 | 7 | 0 | 1.948677  | 0.472776  | 3.171414  |
| 38 | 6 | 0 | 2.929953  | -2.101729 | 1.097636  |
| 39 | 7 | 0 | 3.396936  | -3.173965 | 1.178579  |
| 40 | 7 | 0 | -1.328999 | -1.431349 | -0.613718 |
| 41 | 1 | 0 | 0.911451  | -0.849127 | -0.711357 |

-----  
1405\_biphenyIO\_ZWINT\_b3lyp631dp\_PCMDmsO.log

Standard orientation:

| Center<br>Number | Atomic<br>Number | Atomic<br>Type | Coordinates (Angstroms) |           |           |
|------------------|------------------|----------------|-------------------------|-----------|-----------|
|                  |                  |                | X                       | Y         | Z         |
| 1                | 6                | 0              | -3.371461               | -2.155548 | 1.691859  |
| 2                | 6                | 0              | -2.128857               | -2.290252 | 2.313509  |
| 3                | 6                | 0              | -1.005214               | -1.688902 | 1.745760  |
| 4                | 6                | 0              | -1.142350               | -0.963669 | 0.563872  |
| 5                | 6                | 0              | -2.372845               | -0.810312 | -0.088886 |
| 6                | 6                | 0              | -3.483121               | -1.425523 | 0.507435  |
| 7                | 1                | 0              | -4.251819               | -2.619439 | 2.125991  |
| 8                | 1                | 0              | -2.030859               | -2.854630 | 3.235429  |
| 9                | 1                | 0              | -0.028556               | -1.771707 | 2.211809  |
| 10               | 1                | 0              | -4.451070               | -1.330346 | 0.022662  |
| 11               | 8                | 0              | -0.019133               | -0.299646 | 0.044272  |
| 12               | 6                | 0              | 1.009481                | -1.036197 | -0.475397 |
| 13               | 6                | 0              | 2.308809                | -0.493947 | -0.409177 |
| 14               | 6                | 0              | 0.822356                | -2.277205 | -1.091502 |
| 15               | 6                | 0              | 3.392045                | -1.187669 | -0.958596 |
| 16               | 6                | 0              | 1.905615                | -2.956824 | -1.642223 |
| 17               | 1                | 0              | -0.175289               | -2.698210 | -1.134030 |
| 18               | 6                | 0              | 3.191871                | -2.414569 | -1.582174 |
| 19               | 1                | 0              | 4.386953                | -0.760977 | -0.904715 |
| 20               | 1                | 0              | 1.740466                | -3.914587 | -2.124739 |
| 21               | 1                | 0              | 4.034106                | -2.942636 | -2.014612 |
| 22               | 6                | 0              | 3.722148                | 0.882965  | 1.210996  |
| 23               | 6                | 0              | 1.822218                | 1.806093  | 0.237538  |
| 24               | 6                | 0              | 3.380540                | 2.152430  | 2.006256  |
| 25               | 1                | 0              | 3.812244                | -0.020832 | 1.813387  |
| 26               | 1                | 0              | 4.617877                | 0.993722  | 0.595247  |
| 27               | 6                | 0              | 2.329362                | 2.875894  | 1.133705  |
| 28               | 1                | 0              | 0.976428                | 1.910484  | -0.443052 |
| 29               | 1                | 0              | 4.265168                | 2.762716  | 2.188156  |
| 30               | 1                | 0              | 2.944415                | 1.883873  | 2.970676  |
| 31               | 1                | 0              | 1.513823                | 3.337677  | 1.697682  |
| 32               | 1                | 0              | 2.758542                | 3.668707  | 0.505148  |
| 33               | 6                | 0              | -2.518038               | -0.000151 | -1.366039 |
| 34               | 6                | 0              | -2.514440               | 1.513971  | -1.156900 |
| 35               | 1                | 0              | -3.446713               | -0.313989 | -1.858074 |
| 36               | 6                | 0              | -1.393687               | 2.262462  | -1.493456 |
| 37               | 7                | 0              | -0.423019               | 2.866494  | -1.793882 |
| 38               | 6                | 0              | -3.603162               | 2.141638  | -0.545677 |
| 39               | 7                | 0              | -4.539627               | 2.644378  | -0.037681 |
| 40               | 7                | 0              | 2.546013                | 0.733274  | 0.289657  |
| 41               | 1                | 0              | -1.703836               | -0.249792 | -2.053214 |

-----  
1409\_biphenylO\_PRODUCT\_b3lyp631dp\_PCMDmso.log

Standard orientation:

| Center<br>Number | Atomic<br>Number | Atomic<br>Type | Coordinates (Angstroms) |           |           |
|------------------|------------------|----------------|-------------------------|-----------|-----------|
|                  |                  |                | X                       | Y         | Z         |
| 1                | 6                | 0              | 4.323049                | -0.908739 | -0.253432 |
| 2                | 6                | 0              | 4.349421                | -0.037812 | 0.836371  |
| 3                | 6                | 0              | 3.177384                | 0.599303  | 1.245053  |
| 4                | 6                | 0              | 1.985549                | 0.362175  | 0.562255  |
| 5                | 6                | 0              | 1.928393                | -0.523121 | -0.529195 |
| 6                | 6                | 0              | 3.121439                | -1.144041 | -0.922907 |
| 7                | 1                | 0              | 5.230364                | -1.406419 | -0.580196 |
| 8                | 1                | 0              | 5.277414                | 0.150188  | 1.367235  |
| 9                | 1                | 0              | 3.167538                | 1.277625  | 2.091641  |
| 10               | 1                | 0              | 3.101480                | -1.827615 | -1.767208 |
| 11               | 8                | 0              | 0.829137                | 0.941546  | 1.064637  |
| 12               | 6                | 0              | 0.126717                | 1.844671  | 0.281436  |
| 13               | 6                | 0              | -1.226893               | 1.567692  | 0.019789  |
| 14               | 6                | 0              | 0.726978                | 3.017561  | -0.178289 |
| 15               | 6                | 0              | -1.974070               | 2.520921  | -0.686524 |
| 16               | 6                | 0              | -0.033330               | 3.946889  | -0.888271 |
| 17               | 1                | 0              | 1.775583                | 3.198072  | 0.034515  |
| 18               | 6                | 0              | -1.386629               | 3.703916  | -1.135615 |
| 19               | 1                | 0              | -3.020597               | 2.320518  | -0.895700 |
| 20               | 1                | 0              | 0.430978                | 4.863072  | -1.239643 |
| 21               | 1                | 0              | -1.980259               | 4.428272  | -1.684266 |
| 22               | 6                | 0              | -2.965725               | 0.381776  | 1.342145  |
| 23               | 6                | 0              | -1.870452               | -0.787565 | -0.464061 |
| 24               | 6                | 0              | -3.369984               | -1.086176 | 1.450728  |
| 25               | 1                | 0              | -2.700774               | 0.833012  | 2.303527  |
| 26               | 1                | 0              | -3.783979               | 0.976581  | 0.905357  |
| 27               | 6                | 0              | -3.083652               | -1.613594 | 0.034700  |
| 28               | 1                | 0              | -2.027198               | -0.458454 | -1.500821 |
| 29               | 1                | 0              | -4.415527               | -1.213154 | 1.740900  |
| 30               | 1                | 0              | -2.743812               | -1.596615 | 2.187906  |
| 31               | 1                | 0              | -2.911236               | -2.691898 | 0.006216  |
| 32               | 1                | 0              | -3.932784               | -1.406735 | -0.623185 |
| 33               | 6                | 0              | 0.648763                | -0.792554 | -1.286538 |
| 34               | 6                | 0              | -0.499188               | -1.615124 | -0.535479 |
| 35               | 1                | 0              | 0.902489                | -1.345857 | -2.191439 |
| 36               | 6                | 0              | -0.746464               | -2.840237 | -1.323306 |
| 37               | 7                | 0              | -0.950089               | -3.779484 | -1.974531 |
| 38               | 6                | 0              | -0.107484               | -2.046570 | 0.818342  |
| 39               | 7                | 0              | 0.169386                | -2.420023 | 1.881399  |
| 40               | 7                | 0              | -1.781930               | 0.332308  | 0.468000  |
| 41               | 1                | 0              | 0.192717                | 0.141204  | -1.619217 |

-----  
1411aab\_biphenylO\_pyrrolidine\_CN2\_PRODUCT\_b3lyp631dp\_PCMDmso.log

Standard orientation:

| Center<br>Number | Atomic<br>Number | Atomic<br>Type | Coordinates (Angstroms) |           |           |
|------------------|------------------|----------------|-------------------------|-----------|-----------|
|                  |                  |                | X                       | Y         | Z         |
| 1                | 6                | 0              | -0.969231               | 3.779616  | -1.068833 |
| 2                | 6                | 0              | -1.690515               | 2.842007  | -0.327244 |
| 3                | 6                | 0              | -1.033674               | 1.881152  | 0.449833  |
| 4                | 6                | 0              | 0.364775                | 1.900038  | 0.482810  |
| 5                | 6                | 0              | 1.101360                | 2.828491  | -0.249667 |
| 6                | 6                | 0              | 0.426468                | 3.767472  | -1.032151 |
| 7                | 1                | 0              | -1.494423               | 4.516313  | -1.668163 |
| 8                | 1                | 0              | -2.776494               | 2.849650  | -0.353473 |
| 9                | 1                | 0              | 2.184939                | 2.814746  | -0.201570 |
| 10               | 1                | 0              | 0.994492                | 4.495930  | -1.602665 |
| 11               | 6                | 0              | -1.783612               | 0.851819  | 1.253888  |
| 12               | 6                | 0              | -1.973168               | -0.554772 | 0.558000  |
| 13               | 1                | 0              | -2.784175               | 1.226850  | 1.482927  |
| 14               | 6                | 0              | -2.691896               | -0.366407 | -0.718767 |
| 15               | 7                | 0              | -3.267313               | -0.193082 | -1.711479 |
| 16               | 6                | 0              | -2.864663               | -1.324895 | 1.455916  |
| 17               | 7                | 0              | -3.541555               | -1.905668 | 2.198117  |

|    |   |   |           |           |           |
|----|---|---|-----------|-----------|-----------|
| 18 | 6 | 0 | 1.976295  | 0.194290  | 0.785245  |
| 19 | 6 | 0 | 3.272275  | 0.339240  | 1.271245  |
| 20 | 6 | 0 | 1.647721  | -0.764565 | -0.197321 |
| 21 | 6 | 0 | 4.303407  | -0.447692 | 0.758114  |
| 22 | 1 | 0 | 3.454366  | 1.084769  | 2.038387  |
| 23 | 6 | 0 | 2.708234  | -1.531877 | -0.709177 |
| 24 | 6 | 0 | 4.015202  | -1.371135 | -0.245717 |
| 25 | 1 | 0 | 5.315867  | -0.329856 | 1.130177  |
| 26 | 1 | 0 | 2.518259  | -2.280879 | -1.467972 |
| 27 | 1 | 0 | 4.803780  | -1.989081 | -0.663839 |
| 28 | 7 | 0 | 0.293937  | -0.884194 | -0.636174 |
| 29 | 6 | 0 | -0.655828 | -1.430993 | 0.359088  |
| 30 | 1 | 0 | -1.277829 | 0.658395  | 2.201976  |
| 31 | 6 | 0 | 0.064978  | -1.640858 | -1.887197 |
| 32 | 1 | 0 | 0.912744  | -1.532171 | -2.562960 |
| 33 | 1 | 0 | -0.805561 | -1.214333 | -2.393189 |
| 34 | 6 | 0 | -1.013800 | -2.877895 | -0.128526 |
| 35 | 1 | 0 | -0.748597 | -3.613701 | 0.633205  |
| 36 | 1 | 0 | -2.088185 | -2.979286 | -0.307274 |
| 37 | 6 | 0 | -0.230608 | -3.079465 | -1.441748 |
| 38 | 1 | 0 | 0.699112  | -3.624464 | -1.255049 |
| 39 | 1 | 0 | -0.803074 | -3.639714 | -2.185313 |
| 40 | 1 | 0 | -0.183014 | -1.446987 | 1.341851  |
| 41 | 8 | 0 | 0.979998  | 0.990373  | 1.334119  |

1501aaa\_model2\_PhPh\_pyrrolidine\_CN2\_b3lyp631dp\_PCMDmso.log

Standard orientation:

| Center<br>Number | Atomic<br>Number | Atomic<br>Type | Coordinates (Angstroms) |           |           |
|------------------|------------------|----------------|-------------------------|-----------|-----------|
|                  |                  |                | X                       | Y         | Z         |
| 1                | 6                | 0              | -1.957409               | 3.212738  | 0.769854  |
| 2                | 6                | 0              | -2.126556               | 2.013303  | 0.091177  |
| 3                | 6                | 0              | -1.016933               | 1.234212  | -0.302309 |
| 4                | 6                | 0              | 0.299775                | 1.689393  | 0.008879  |
| 5                | 6                | 0              | 0.440228                | 2.905206  | 0.690495  |
| 6                | 6                | 0              | -0.668080               | 3.660869  | 1.069545  |
| 7                | 1                | 0              | -2.824070               | 3.800439  | 1.053583  |
| 8                | 1                | 0              | -3.127989               | 1.695128  | -0.170181 |
| 9                | 1                | 0              | 1.438358                | 3.252027  | 0.937511  |
| 10               | 1                | 0              | -0.525427               | 4.597890  | 1.598903  |
| 11               | 6                | 0              | -1.162662               | 0.015140  | -1.074898 |
| 12               | 6                | 0              | -2.243585               | -0.811894 | -1.228026 |
| 13               | 1                | 0              | -0.276560               | -0.291345 | -1.621611 |
| 14               | 6                | 0              | -3.500203               | -0.683161 | -0.554818 |
| 15               | 7                | 0              | -4.532888               | -0.622926 | -0.020484 |
| 16               | 6                | 0              | -2.141357               | -1.946112 | -2.098646 |
| 17               | 7                | 0              | -2.065681               | -2.869223 | -2.803861 |
| 18               | 6                | 0              | 1.522407                | 0.947746  | -0.418205 |
| 19               | 6                | 0              | 2.403875                | 1.623477  | -1.278364 |
| 20               | 6                | 0              | 1.806868                | -0.402798 | -0.051247 |
| 21               | 6                | 0              | 3.512389                | 1.000053  | -1.844953 |
| 22               | 1                | 0              | 2.176411                | 2.653747  | -1.536753 |
| 23               | 6                | 0              | 2.911610                | -1.030444 | -0.671321 |
| 24               | 6                | 0              | 3.743835                | -0.343933 | -1.550233 |
| 25               | 1                | 0              | 4.163652                | 1.544728  | -2.520578 |
| 26               | 1                | 0              | 3.135892                | -2.064889 | -0.444377 |
| 27               | 1                | 0              | 4.587465                | -0.864987 | -1.994073 |
| 28               | 7                | 0              | 1.018014                | -1.100645 | 0.860749  |
| 29               | 6                | 0              | 1.215872                | -2.543998 | 1.063940  |
| 30               | 1                | 0              | 2.255439                | -2.778994 | 1.343181  |
| 31               | 1                | 0              | 0.983187                | -3.097579 | 0.148059  |
| 32               | 6                | 0              | 0.284643                | -2.871303 | 2.231091  |
| 33               | 1                | 0              | 0.560827                | -3.802100 | 2.732640  |
| 34               | 1                | 0              | -0.748522               | -2.964786 | 1.878717  |
| 35               | 6                | 0              | 0.499897                | -0.476279 | 2.103621  |
| 36               | 6                | 0              | 0.441799                | -1.629224 | 3.118844  |
| 37               | 1                | 0              | 1.381787                | -1.689776 | 3.678388  |
| 38               | 1                | 0              | -0.370343               | -1.500845 | 3.838968  |
| 39               | 1                | 0              | 1.153869                | 0.338237  | 2.431970  |
| 40               | 1                | 0              | -0.498570               | -0.055289 | 1.944250  |

1501aab\_model2\_PhPh\_pyrrolidine\_CN2\_b3lyp631dp\_PCMDmso.log

Standard orientation:

| Center<br>Number | Atomic<br>Number | Atomic<br>Type | Coordinates (Angstroms) |           |           |
|------------------|------------------|----------------|-------------------------|-----------|-----------|
|                  |                  |                | X                       | Y         | Z         |
| 1                | 6                | 0              | 1.957660                | -3.212451 | 0.770357  |
| 2                | 6                | 0              | 2.126816                | -2.013103 | 0.091534  |
| 3                | 6                | 0              | 1.017182                | -1.234135 | -0.302191 |
| 4                | 6                | 0              | -0.299533               | -1.689376 | 0.008922  |
| 5                | 6                | 0              | -0.439987               | -2.905097 | 0.690684  |
| 6                | 6                | 0              | 0.668328                | -3.660625 | 1.069970  |
| 7                | 1                | 0              | 2.824316                | -3.800075 | 1.054260  |
| 8                | 1                | 0              | 3.128255                | -1.694917 | -0.169773 |
| 9                | 1                | 0              | -1.438125               | -3.251938 | 0.937648  |
| 10               | 1                | 0              | 0.525684                | -4.597576 | 1.599454  |
| 11               | 6                | 0              | 1.162937                | -0.015160 | -1.074958 |
| 12               | 6                | 0              | 2.243792                | 0.811980  | -1.228005 |
| 13               | 1                | 0              | 0.276909                | 0.291137  | -1.621888 |
| 14               | 6                | 0              | 3.500258                | 0.683559  | -0.554447 |
| 15               | 7                | 0              | 4.532965                | 0.623446  | -0.020142 |
| 16               | 6                | 0              | 2.141595                | 1.946064  | -2.098798 |
| 17               | 7                | 0              | 2.066078                | 2.869051  | -2.804192 |
| 18               | 6                | 0              | -1.522190               | -0.947863 | -0.418365 |
| 19               | 6                | 0              | -2.403405               | -1.623768 | -1.278643 |
| 20               | 6                | 0              | -1.806989               | 0.402596  | -0.051384 |
| 21               | 6                | 0              | -3.511982               | -1.000583 | -1.845357 |
| 22               | 1                | 0              | -2.175676               | -2.653988 | -1.536998 |
| 23               | 6                | 0              | -2.911856               | 1.029982  | -0.671527 |
| 24               | 6                | 0              | -3.743808               | 0.343328  | -1.550572 |
| 25               | 1                | 0              | -4.163012               | -1.545384 | -2.521106 |
| 26               | 1                | 0              | -3.136463               | 2.064336  | -0.444480 |
| 27               | 1                | 0              | -4.587540               | 0.864194  | -1.994436 |
| 28               | 7                | 0              | -1.018411               | 1.100675  | 0.860686  |
| 29               | 6                | 0              | -1.217040               | 2.543887  | 1.064088  |
| 30               | 1                | 0              | -2.256656               | 2.778285  | 1.343701  |
| 31               | 1                | 0              | -0.984964               | 3.097640  | 0.148167  |
| 32               | 6                | 0              | -0.285565               | 2.871581  | 2.230900  |
| 33               | 1                | 0              | -0.561948               | 3.802254  | 2.732553  |
| 34               | 1                | 0              | 0.747447                | 2.965494  | 1.878164  |
| 35               | 6                | 0              | -0.500215               | 0.476401  | 2.103570  |
| 36               | 6                | 0              | -0.441915               | 1.629447  | 3.118705  |
| 37               | 1                | 0              | -1.381648               | 1.689749  | 3.678711  |
| 38               | 1                | 0              | 0.370601                | 1.501311  | 3.838435  |
| 39               | 1                | 0              | -1.154268               | -0.337984 | 2.432103  |
| 40               | 1                | 0              | 0.498162                | 0.055279  | 1.944108  |

1504aaa\_model2\_PhPh\_pyrrolidine\_CN2\_TS\_b3lyp631dp\_PCMDmso\_f.log

Standard orientation:

| Center<br>Number | Atomic<br>Number | Atomic<br>Type | Coordinates (Angstroms) |           |           |
|------------------|------------------|----------------|-------------------------|-----------|-----------|
|                  |                  |                | X                       | Y         | Z         |
| 1                | 6                | 0              | -1.259538               | 3.323872  | -0.320504 |
| 2                | 6                | 0              | -1.656530               | 1.991812  | -0.407630 |
| 3                | 6                | 0              | -0.723046               | 0.949628  | -0.530378 |
| 4                | 6                | 0              | 0.659869                | 1.279391  | -0.559031 |
| 5                | 6                | 0              | 1.038152                | 2.629925  | -0.488853 |
| 6                | 6                | 0              | 0.095497                | 3.648036  | -0.363846 |
| 7                | 1                | 0              | -2.009663               | 4.103234  | -0.230033 |
| 8                | 1                | 0              | -2.714220               | 1.762724  | -0.400060 |
| 9                | 1                | 0              | 2.095060                | 2.875841  | -0.519785 |
| 10               | 1                | 0              | 0.419059                | 4.682334  | -0.302073 |
| 11               | 6                | 0              | -1.168690               | -0.479226 | -0.691190 |
| 12               | 6                | 0              | -2.540554               | -0.891812 | -0.932590 |
| 13               | 1                | 0              | -0.491314               | -1.023629 | -1.352095 |
| 14               | 6                | 0              | -3.660702               | -0.391619 | -0.236367 |
| 15               | 7                | 0              | -4.602095               | 0.010310  | 0.335250  |
| 16               | 6                | 0              | -2.770899               | -2.019893 | -1.750405 |
| 17               | 7                | 0              | -2.957921               | -2.947180 | -2.442294 |
| 18               | 6                | 0              | 1.770050                | 0.280369  | -0.691783 |
| 19               | 6                | 0              | 2.634594                | 0.329213  | -1.796025 |
| 20               | 6                | 0              | 2.033591                | -0.676070 | 0.307521  |
| 21               | 6                | 0              | 3.707641                | -0.554909 | -1.910114 |

|    |   |   |           |           |           |
|----|---|---|-----------|-----------|-----------|
| 22 | 1 | 0 | 2.451230  | 1.063643  | -2.574176 |
| 23 | 6 | 0 | 3.105775  | -1.563603 | 0.197945  |
| 24 | 6 | 0 | 3.945064  | -1.503934 | -0.914209 |
| 25 | 1 | 0 | 4.356994  | -0.502544 | -2.778308 |
| 26 | 1 | 0 | 3.276344  | -2.286645 | 0.988974  |
| 27 | 1 | 0 | 4.780136  | -2.191713 | -0.998973 |
| 28 | 7 | 0 | 1.161493  | -0.748732 | 1.440782  |
| 29 | 6 | 0 | 0.051479  | -1.529367 | 1.418455  |
| 30 | 1 | 0 | 0.125651  | -2.502547 | 0.931394  |
| 31 | 1 | 0 | -0.777942 | -0.999388 | 0.416931  |
| 32 | 6 | 0 | -0.692760 | -1.348565 | 2.721665  |
| 33 | 1 | 0 | -1.775099 | -1.434007 | 2.602712  |
| 34 | 1 | 0 | -0.374222 | -2.136590 | 3.415812  |
| 35 | 6 | 0 | 1.183145  | 0.197496  | 2.580622  |
| 36 | 1 | 0 | 1.971486  | -0.112080 | 3.276934  |
| 37 | 1 | 0 | 1.403691  | 1.210883  | 2.239208  |
| 38 | 6 | 0 | -0.225584 | 0.049399  | 3.184123  |
| 39 | 1 | 0 | -0.219341 | 0.152602  | 4.270375  |
| 40 | 1 | 0 | -0.887516 | 0.816229  | 2.772579  |

1505aaa\_model2\_PhPh\_pyrrolidine\_CN2\_ZW\_int\_b3lyp631dp\_PCMdmsol.log

Standard orientation:

| Center<br>Number | Atomic<br>Number | Atomic<br>Type | Coordinates (Angstroms) |           |           |
|------------------|------------------|----------------|-------------------------|-----------|-----------|
|                  |                  |                | X                       | Y         | Z         |
| 1                | 6                | 0              | 1.877542                | -1.971306 | 2.416902  |
| 2                | 6                | 0              | 2.164702                | -1.424425 | 1.168764  |
| 3                | 6                | 0              | 1.157093                | -1.154808 | 0.230720  |
| 4                | 6                | 0              | -0.178692               | -1.432501 | 0.590207  |
| 5                | 6                | 0              | -0.461097               | -2.000235 | 1.845761  |
| 6                | 6                | 0              | 0.556147                | -2.267686 | 2.758844  |
| 7                | 1                | 0              | 2.682092                | -2.172306 | 3.118329  |
| 8                | 1                | 0              | 3.192793                | -1.198607 | 0.901843  |
| 9                | 1                | 0              | -1.492114               | -2.228772 | 2.101608  |
| 10               | 1                | 0              | 0.318915                | -2.702420 | 3.724938  |
| 11               | 6                | 0              | 1.539770                | -0.649020 | -1.160081 |
| 12               | 6                | 0              | 2.587596                | 0.455308  | -1.213980 |
| 13               | 1                | 0              | 1.920567                | -1.505529 | -1.731403 |
| 14               | 6                | 0              | 2.216987                | 1.770970  | -0.943352 |
| 15               | 7                | 0              | 1.861474                | 2.875056  | -0.722995 |
| 16               | 6                | 0              | 3.918193                | 0.175635  | -1.531502 |
| 17               | 7                | 0              | 5.035841                | -0.078830 | -1.807272 |
| 18               | 6                | 0              | -1.321239               | -1.190748 | -0.350957 |
| 19               | 6                | 0              | -1.809535               | -2.242417 | -1.139704 |
| 20               | 6                | 0              | -1.950475               | 0.059184  | -0.499753 |
| 21               | 6                | 0              | -2.861635               | -2.059122 | -2.037279 |
| 22               | 1                | 0              | -1.339960               | -3.216382 | -1.047739 |
| 23               | 6                | 0              | -3.003254               | 0.258752  | -1.396902 |
| 24               | 6                | 0              | -3.457658               | -0.805356 | -2.172346 |
| 25               | 1                | 0              | -3.212562               | -2.896309 | -2.631960 |
| 26               | 1                | 0              | -3.471034               | 1.235225  | -1.466161 |
| 27               | 1                | 0              | -4.276191               | -0.653617 | -2.867617 |
| 28               | 7                | 0              | -1.541760               | 1.193494  | 0.300056  |
| 29               | 6                | 0              | -1.094062               | 2.309261  | -0.173333 |
| 30               | 1                | 0              | -0.894705               | 2.421988  | -1.232467 |
| 31               | 1                | 0              | 0.635507                | -0.332965 | -1.689969 |
| 32               | 6                | 0              | -0.935620               | 3.358388  | 0.862858  |
| 33               | 1                | 0              | 0.027375                | 3.858889  | 0.744528  |
| 34               | 1                | 0              | -1.723048               | 4.109130  | 0.707631  |
| 35               | 6                | 0              | -1.808664               | 1.272763  | 1.775312  |
| 36               | 1                | 0              | -2.894912               | 1.306681  | 1.896536  |
| 37               | 1                | 0              | -1.422640               | 0.376150  | 2.256394  |
| 38               | 6                | 0              | -1.096224               | 2.571622  | 2.185269  |
| 39               | 1                | 0              | -1.665600               | 3.122723  | 2.933610  |
| 40               | 1                | 0              | -0.112615               | 2.342518  | 2.600694  |

1509aaa\_model2\_PhPh\_pyrrolidine\_CN2\_PRODUCTb3lyp631dp\_PCMdmsol.log

Standard orientation:

| Center<br>Number | Atomic<br>Number | Atomic<br>Type | Coordinates (Angstroms) |   |   |
|------------------|------------------|----------------|-------------------------|---|---|
|                  |                  |                | X                       | Y | Z |



|    |   |   |           |           |           |
|----|---|---|-----------|-----------|-----------|
| 1  | 6 | 0 | -0.896302 | 3.847245  | -0.432833 |
| 2  | 6 | 0 | -0.046725 | 3.043406  | 0.325101  |
| 3  | 6 | 0 | -0.324397 | 1.687099  | 0.551035  |
| 4  | 6 | 0 | -1.502412 | 1.131636  | 0.005111  |
| 5  | 6 | 0 | -2.358683 | 1.957390  | -0.742228 |
| 6  | 6 | 0 | -2.062029 | 3.299956  | -0.968407 |
| 7  | 1 | 0 | -0.654098 | 4.893469  | -0.592070 |
| 8  | 1 | 0 | 0.846957  | 3.478304  | 0.763907  |
| 9  | 1 | 0 | -3.262889 | 1.527393  | -1.162383 |
| 10 | 1 | 0 | -2.738326 | 3.912742  | -1.556686 |
| 11 | 6 | 0 | 0.610873  | 0.908284  | 1.454362  |
| 12 | 6 | 0 | 1.819475  | 0.171067  | 0.747544  |
| 13 | 1 | 0 | 1.042384  | 1.601225  | 2.180367  |
| 14 | 6 | 0 | 2.427946  | 1.042397  | -0.274677 |
| 15 | 7 | 0 | 2.913678  | 1.723299  | -1.079111 |
| 16 | 6 | 0 | 2.850857  | -0.097419 | 1.770941  |
| 17 | 7 | 0 | 3.636175  | -0.339789 | 2.590465  |
| 18 | 6 | 0 | -1.899062 | -0.286384 | 0.220823  |
| 19 | 6 | 0 | -3.162511 | -0.574106 | 0.767366  |
| 20 | 6 | 0 | -1.058196 | -1.358709 | -0.139354 |
| 21 | 6 | 0 | -3.585482 | -1.886261 | 0.963829  |
| 22 | 1 | 0 | -3.810420 | 0.250118  | 1.050097  |
| 23 | 6 | 0 | -1.490839 | -2.677372 | 0.067909  |
| 24 | 6 | 0 | -2.743761 | -2.944804 | 0.615093  |
| 25 | 1 | 0 | -4.563669 | -2.081525 | 1.392534  |
| 26 | 1 | 0 | -0.836565 | -3.499772 | -0.206022 |
| 27 | 1 | 0 | -3.059354 | -3.972047 | 0.770491  |
| 28 | 7 | 0 | 0.221202  | -1.092882 | -0.733064 |
| 29 | 6 | 0 | 1.391978  | -1.231069 | 0.129897  |
| 30 | 1 | 0 | 1.172678  | -1.851311 | 1.008213  |
| 31 | 1 | 0 | 0.073274  | 0.143556  | 2.020842  |
| 32 | 6 | 0 | 2.479374  | -1.885454 | -0.752352 |
| 33 | 1 | 0 | 3.484289  | -1.504001 | -0.552208 |
| 34 | 1 | 0 | 2.492652  | -2.959658 | -0.545609 |
| 35 | 6 | 0 | 0.482660  | -1.697059 | -2.057053 |
| 36 | 1 | 0 | 0.139102  | -2.740876 | -2.104907 |
| 37 | 1 | 0 | -0.045966 | -1.137664 | -2.835714 |
| 38 | 6 | 0 | 2.003728  | -1.630465 | -2.193002 |
| 39 | 1 | 0 | 2.388998  | -2.370588 | -2.898247 |
| 40 | 1 | 0 | 2.314629  | -0.640024 | -2.535269 |

1509aab\_model2\_PhPh\_pyrrolidine\_CN2\_PRODUCTb3lyp631dp\_PCMdmso.log

Standard orientation:

| Center Number | Atomic Number | Atomic Type | Coordinates (Angstroms) |           |           |
|---------------|---------------|-------------|-------------------------|-----------|-----------|
|               |               |             | X                       | Y         | Z         |
| 1             | 6             | 0           | 0.896706                | 3.847190  | 0.432729  |
| 2             | 6             | 0           | 0.047027                | 3.043396  | -0.325135 |
| 3             | 6             | 0           | 0.324540                | 1.687034  | -0.550986 |
| 4             | 6             | 0           | 1.502531                | 1.131502  | -0.005087 |
| 5             | 6             | 0           | 2.358917                | 1.957211  | 0.742171  |
| 6             | 6             | 0           | 2.062398                | 3.299814  | 0.968295  |
| 7             | 1             | 0           | 0.654611                | 4.893446  | 0.591921  |
| 8             | 1             | 0           | -0.846615               | 3.478363  | -0.763952 |
| 9             | 1             | 0           | 3.263111                | 1.527148  | 1.162282  |
| 10            | 1             | 0           | 2.738788                | 3.912564  | 1.556503  |
| 11            | 6             | 0           | -0.610808               | 0.908307  | -1.454320 |
| 12            | 6             | 0           | -1.819521               | 0.171186  | -0.747556 |
| 13            | 1             | 0           | -1.042264               | 1.601301  | -2.180304 |
| 14            | 6             | 0           | -2.428003               | 1.042572  | 0.274579  |
| 15            | 7             | 0           | -2.913755               | 1.723476  | 1.079000  |
| 16            | 6             | 0           | -2.850757               | -0.097296 | -1.771031 |
| 17            | 7             | 0           | -3.635988               | -0.339708 | -2.590632 |
| 18            | 6             | 0           | 1.899054                | -0.286555 | -0.220785 |
| 19            | 6             | 0           | 3.162454                | -0.574437 | -0.767355 |
| 20            | 6             | 0           | 1.058073                | -1.358770 | 0.139419  |
| 21            | 6             | 0           | 3.585245                | -1.886651 | -0.963821 |
| 22            | 1             | 0           | 3.810468                | 0.249698  | -1.050104 |
| 23            | 6             | 0           | 1.490516                | -2.677493 | -0.067848 |
| 24            | 6             | 0           | 2.743394                | -2.945086 | -0.615066 |
| 25            | 1             | 0           | 4.563393                | -2.082046 | -1.392554 |
| 26            | 1             | 0           | 0.836141                | -3.499802 | 0.206102  |

|    |   |   |           |           |           |
|----|---|---|-----------|-----------|-----------|
| 27 | 1 | 0 | 3.058851  | -3.972369 | -0.770473 |
| 28 | 7 | 0 | -0.221287 | -1.092713 | 0.733120  |
| 29 | 6 | 0 | -1.392073 | -1.230965 | -0.129834 |
| 30 | 1 | 0 | -1.172746 | -1.851225 | -1.008121 |
| 31 | 1 | 0 | -0.073285 | 0.143538  | -2.020816 |
| 32 | 6 | 0 | -2.479469 | -1.885278 | 0.752437  |
| 33 | 1 | 0 | -3.484382 | -1.503869 | 0.552248  |
| 34 | 1 | 0 | -2.492720 | -2.959504 | 0.545802  |
| 35 | 6 | 0 | -0.482805 | -1.696722 | 2.057197  |
| 36 | 1 | 0 | -0.139196 | -2.740504 | 2.105201  |
| 37 | 1 | 0 | 0.045740  | -1.137177 | 2.835802  |
| 38 | 6 | 0 | -2.003875 | -1.630140 | 2.193071  |
| 39 | 1 | 0 | -2.389174 | -2.370182 | 2.898379  |
| 40 | 1 | 0 | -2.314790 | -0.639662 | 2.535226  |

1509aac\_model2\_PhPh\_pyrrolidine\_CN2\_PRODUCTb3lyp631dp\_PCMdmsol.log

Standard orientation:

| Center Number | Atomic Number | Atomic Type | Coordinates (Angstroms) |           |           |
|---------------|---------------|-------------|-------------------------|-----------|-----------|
|               |               |             | X                       | Y         | Z         |
| 1             | 6             | 0           | -0.156305               | -4.009930 | 0.426907  |
| 2             | 6             | 0           | 0.445405                | -3.115214 | -0.458272 |
| 3             | 6             | 0           | -0.035053               | -1.808775 | -0.603150 |
| 4             | 6             | 0           | -1.151830               | -1.382559 | 0.151272  |
| 5             | 6             | 0           | -1.742916               | -2.295918 | 1.040447  |
| 6             | 6             | 0           | -1.250740               | -3.592901 | 1.184381  |
| 7             | 1             | 0           | 0.227352                | -5.020877 | 0.522577  |
| 8             | 1             | 0           | 1.296717                | -3.434789 | -1.052656 |
| 9             | 1             | 0           | -2.598459               | -1.976963 | 1.627616  |
| 10            | 1             | 0           | -1.725190               | -4.274816 | 1.883631  |
| 11            | 6             | 0           | 0.673143                | -0.836302 | -1.507884 |
| 12            | 6             | 0           | 1.740801                | 0.009915  | -0.709568 |
| 13            | 1             | 0           | 1.187324                | -1.348406 | -2.324269 |
| 14            | 6             | 0           | 2.917805                | -0.838719 | -0.433765 |
| 15            | 7             | 0           | 3.824803                | -1.523872 | -0.199968 |
| 16            | 6             | 0           | 2.172632                | 1.144058  | -1.546877 |
| 17            | 7             | 0           | 2.487085                | 2.041147  | -2.212558 |
| 18            | 6             | 0           | -1.810053               | -0.056289 | -0.070716 |
| 19            | 6             | 0           | -3.161418               | -0.126696 | -0.461323 |
| 20            | 6             | 0           | -1.209984               | 1.233440  | 0.055145  |
| 21            | 6             | 0           | -3.934807               | 0.993843  | -0.742944 |
| 22            | 1             | 0           | -3.602801               | -1.114147 | -0.556911 |
| 23            | 6             | 0           | -2.003615               | 2.359874  | -0.274884 |
| 24            | 6             | 0           | -3.334650               | 2.248972  | -0.655260 |
| 25            | 1             | 0           | -4.972087               | 0.885391  | -1.042258 |
| 26            | 1             | 0           | -1.555027               | 3.344907  | -0.244036 |
| 27            | 1             | 0           | -3.894019               | 3.148875  | -0.893969 |
| 28            | 7             | 0           | 0.088296                | 1.493827  | 0.512095  |
| 29            | 6             | 0           | 1.179358                | 0.542956  | 0.677410  |
| 30            | 1             | 0           | 0.862559                | -0.347794 | 1.225201  |
| 31            | 1             | 0           | -0.030633               | -0.129597 | -1.951564 |
| 32            | 6             | 0           | 2.257331                | 1.305840  | 1.482078  |
| 33            | 1             | 0           | 2.790814                | 0.638580  | 2.161446  |
| 34            | 1             | 0           | 2.994583                | 1.754006  | 0.807389  |
| 35            | 6             | 0           | 0.403591                | 2.780972  | 1.167097  |
| 36            | 1             | 0           | 0.778423                | 3.521046  | 0.446647  |
| 37            | 1             | 0           | -0.494279               | 3.191172  | 1.634781  |
| 38            | 6             | 0           | 1.473650                | 2.410571  | 2.194128  |
| 39            | 1             | 0           | 2.100653                | 3.260680  | 2.473257  |
| 40            | 1             | 0           | 0.998709                | 2.022199  | 3.100821  |

1601aab\_model3\_PhPhPh\_pyrrolidine\_CN2\_b3lyp631dp\_PCMdmsol.log

Standard orientation:

| Center Number | Atomic Number | Atomic Type | Coordinates (Angstroms) |          |           |
|---------------|---------------|-------------|-------------------------|----------|-----------|
|               |               |             | X                       | Y        | Z         |
| 1             | 6             | 0           | -1.017666               | 3.542605 | 0.818846  |
| 2             | 6             | 0           | -1.820675               | 2.420002 | 0.683232  |
| 3             | 6             | 0           | -1.408679               | 1.318237 | -0.099970 |
| 4             | 6             | 0           | -0.141542               | 1.363582 | -0.753477 |

|    |   |   |           |           |           |
|----|---|---|-----------|-----------|-----------|
| 5  | 6 | 0 | 0.646309  | 2.512685  | -0.602871 |
| 6  | 6 | 0 | 0.219332  | 3.590690  | 0.168763  |
| 7  | 1 | 0 | -1.348911 | 4.373833  | 1.432430  |
| 8  | 1 | 0 | -2.762579 | 2.380500  | 1.215314  |
| 9  | 1 | 0 | 1.601550  | 2.563465  | -1.112236 |
| 10 | 1 | 0 | 0.850306  | 4.469224  | 0.260977  |
| 11 | 6 | 0 | -2.204543 | 0.110347  | -0.201417 |
| 12 | 6 | 0 | -3.539043 | -0.097210 | 0.032654  |
| 13 | 1 | 0 | -1.665101 | -0.773991 | -0.521874 |
| 14 | 6 | 0 | -4.500283 | 0.908902  | 0.367414  |
| 15 | 7 | 0 | -5.317877 | 1.695522  | 0.628712  |
| 16 | 6 | 0 | -4.074871 | -1.420488 | -0.096333 |
| 17 | 7 | 0 | -4.516156 | -2.492842 | -0.199000 |
| 18 | 6 | 0 | 2.475089  | -0.071007 | -0.327839 |
| 19 | 6 | 0 | 3.683236  | 0.582585  | -0.611480 |
| 20 | 6 | 0 | 2.139890  | -0.351117 | 1.028383  |
| 21 | 6 | 0 | 4.532022  | 1.043892  | 0.393739  |
| 22 | 1 | 0 | 3.931619  | 0.768463  | -1.652997 |
| 23 | 6 | 0 | 2.985984  | 0.164896  | 2.034681  |
| 24 | 6 | 0 | 4.155744  | 0.853613  | 1.722985  |
| 25 | 1 | 0 | 5.451435  | 1.562689  | 0.141877  |
| 26 | 1 | 0 | 2.739351  | 0.005101  | 3.076858  |
| 27 | 1 | 0 | 4.782723  | 1.223990  | 2.529332  |
| 28 | 7 | 0 | 1.006414  | -1.098434 | 1.361944  |
| 29 | 6 | 0 | 0.584250  | -1.204014 | 2.765506  |
| 30 | 1 | 0 | 0.282293  | -0.224121 | 3.150039  |
| 31 | 1 | 0 | 1.390688  | -1.584812 | 3.413953  |
| 32 | 6 | 0 | -0.553946 | -2.221746 | 2.717355  |
| 33 | 1 | 0 | -1.473064 | -1.747075 | 2.357245  |
| 34 | 1 | 0 | -0.759181 | -2.662722 | 3.696116  |
| 35 | 6 | 0 | 0.693235  | -2.363542 | 0.648557  |
| 36 | 6 | 0 | 0.330522  | 0.278690  | -1.665769 |
| 37 | 6 | 0 | -0.449419 | -0.039525 | -2.791743 |
| 38 | 6 | 0 | 1.574258  | -0.378429 | -1.483039 |
| 39 | 6 | 0 | -0.022254 | -0.973994 | -3.734003 |
| 40 | 1 | 0 | -1.389848 | 0.481612  | -2.944661 |
| 41 | 6 | 0 | 1.992134  | -1.303978 | -2.450875 |
| 42 | 6 | 0 | 1.209497  | -1.604672 | -3.565555 |
| 43 | 1 | 0 | -0.642884 | -1.194919 | -4.596752 |
| 44 | 1 | 0 | 2.944401  | -1.806506 | -2.310189 |
| 45 | 1 | 0 | 1.560420  | -2.329394 | -4.293933 |
| 46 | 6 | 0 | -0.027486 | -3.237087 | 1.692487  |
| 47 | 1 | 0 | 0.686596  | -3.912509 | 2.175878  |
| 48 | 1 | 0 | -0.813710 | -3.849470 | 1.243555  |
| 49 | 1 | 0 | 1.608226  | -2.837936 | 0.275494  |
| 50 | 1 | 0 | 0.052436  | -2.178651 | -0.219386 |

-----

1601aac\_model3\_PhPhPh\_pyrrolidine\_CN2\_b3lyp631dp\_PCMDmso.log

Standard orientation:

| Center<br>Number | Atomic<br>Number | Atomic<br>Type | Coordinates (Angstroms) |           |           |
|------------------|------------------|----------------|-------------------------|-----------|-----------|
|                  |                  |                | X                       | Y         | Z         |
| 1                | 6                | 0              | 2.235779                | -2.818638 | -1.763633 |
| 2                | 6                | 0              | 2.988641                | -1.915239 | -1.028571 |
| 3                | 6                | 0              | 2.420410                | -0.714892 | -0.545730 |
| 4                | 6                | 0              | 1.048331                | -0.433651 | -0.818170 |
| 5                | 6                | 0              | 0.312582                | -1.366369 | -1.560796 |
| 6                | 6                | 0              | 0.891837                | -2.540990 | -2.032910 |
| 7                | 1                | 0              | 2.688191                | -3.739417 | -2.116512 |
| 8                | 1                | 0              | 4.017097                | -2.157382 | -0.791828 |
| 9                | 1                | 0              | -0.727352               | -1.158475 | -1.783706 |
| 10               | 1                | 0              | 0.296039                | -3.239376 | -2.612256 |
| 11               | 6                | 0              | 3.172207                | 0.197269  | 0.297773  |
| 12               | 6                | 0              | 4.525440                | 0.374266  | 0.414330  |
| 13               | 1                | 0              | 2.577934                | 0.842037  | 0.937431  |
| 14               | 6                | 0              | 5.523543                | -0.266191 | -0.387579 |
| 15               | 7                | 0              | 6.366411                | -0.753757 | -1.025650 |
| 16               | 6                | 0              | 5.032800                | 1.305579  | 1.378541  |
| 17               | 7                | 0              | 5.452295                | 2.060288  | 2.159184  |
| 18               | 6                | 0              | -1.415526               | -0.269855 | 0.985487  |
| 19               | 6                | 0              | -0.615970               | -1.062014 | 1.826358  |
| 20               | 6                | 0              | -2.813809               | -0.559416 | 0.892563  |
| 21               | 6                | 0              | -1.128769               | -2.095776 | 2.603737  |

|    |   |   |           |           |           |
|----|---|---|-----------|-----------|-----------|
| 22 | 1 | 0 | 0.440713  | -0.823764 | 1.896761  |
| 23 | 6 | 0 | -3.321326 | -1.594098 | 1.718328  |
| 24 | 6 | 0 | -2.500587 | -2.343250 | 2.553170  |
| 25 | 1 | 0 | -0.477067 | -2.673200 | 3.251413  |
| 26 | 1 | 0 | -4.378067 | -1.825472 | 1.694310  |
| 27 | 1 | 0 | -2.941027 | -3.130046 | 3.159463  |
| 28 | 7 | 0 | -3.688544 | 0.131144  | 0.059613  |
| 29 | 6 | 0 | -5.134574 | -0.135136 | 0.111664  |
| 30 | 1 | 0 | -5.541709 | 0.116642  | 1.097144  |
| 31 | 1 | 0 | -5.357039 | -1.197362 | -0.078295 |
| 32 | 6 | 0 | -5.706921 | 0.724038  | -1.016308 |
| 33 | 1 | 0 | -5.823879 | 1.761541  | -0.683781 |
| 34 | 1 | 0 | -6.680867 | 0.363029  | -1.356036 |
| 35 | 6 | 0 | -3.319216 | 0.700079  | -1.254235 |
| 36 | 6 | 0 | 0.416265  | 0.857857  | -0.412511 |
| 37 | 6 | 0 | 1.006311  | 2.051466  | -0.870109 |
| 38 | 6 | 0 | -0.769453 | 0.927804  | 0.364009  |
| 39 | 6 | 0 | 0.463416  | 3.298073  | -0.569739 |
| 40 | 1 | 0 | 1.893326  | 1.991704  | -1.493457 |
| 41 | 6 | 0 | -1.292373 | 2.198081  | 0.663117  |
| 42 | 6 | 0 | -0.693421 | 3.369906  | 0.206353  |
| 43 | 1 | 0 | 0.938287  | 4.200588  | -0.941359 |
| 44 | 1 | 0 | -2.187080 | 2.256366  | 1.275052  |
| 45 | 1 | 0 | -1.126331 | 4.332655  | 0.460767  |
| 46 | 6 | 0 | -4.609384 | 0.622903  | -2.082946 |
| 47 | 1 | 0 | -4.675596 | -0.343247 | -2.595824 |
| 48 | 1 | 0 | -4.658958 | 1.410576  | -2.839236 |
| 49 | 1 | 0 | -2.497626 | 0.138587  | -1.709188 |
| 50 | 1 | 0 | -2.987505 | 1.739454  | -1.156039 |

-----

1601aad\_model3\_PhPhPh\_pyrrolidine\_CN2\_b3lyp631dp\_PCMdmsol.log

Standard orientation:

| Center<br>Number | Atomic<br>Number | Atomic<br>Type | Coordinates (Angstroms) |           |           |
|------------------|------------------|----------------|-------------------------|-----------|-----------|
|                  |                  |                | X                       | Y         | Z         |
| 1                | 6                | 0              | 4.557938                | 0.363565  | -0.561036 |
| 2                | 6                | 0              | 3.497585                | 1.120463  | -0.083829 |
| 3                | 6                | 0              | 2.319842                | 0.507763  | 0.400019  |
| 4                | 6                | 0              | 2.218064                | -0.912505 | 0.381270  |
| 5                | 6                | 0              | 3.312678                | -1.652823 | -0.085776 |
| 6                | 6                | 0              | 4.468325                | -1.030851 | -0.555144 |
| 7                | 1                | 0              | 5.456677                | 0.855905  | -0.917059 |
| 8                | 1                | 0              | 3.599395                | 2.197359  | -0.046004 |
| 9                | 1                | 0              | 3.244065                | -2.735877 | -0.093502 |
| 10               | 1                | 0              | 5.296866                | -1.633611 | -0.913623 |
| 11               | 6                | 0              | 1.253325                | 1.272454  | 1.014180  |
| 12               | 6                | 0              | 0.959213                | 2.608262  | 0.935279  |
| 13               | 1                | 0              | 0.592896                | 0.697652  | 1.656199  |
| 14               | 6                | 0              | 1.617856                | 3.564856  | 0.098407  |
| 15               | 7                | 0              | 2.114331                | 4.375016  | -0.574221 |
| 16               | 6                | 0              | -0.116340               | 3.143715  | 1.716885  |
| 17               | 7                | 0              | -0.985306               | 3.591747  | 2.349046  |
| 18               | 6                | 0              | -0.513365               | -1.059057 | -1.102241 |
| 19               | 6                | 0              | 0.415752                | -1.251903 | -2.140574 |
| 20               | 6                | 0              | -1.740829               | -0.382212 | -1.405762 |
| 21               | 6                | 0              | 0.195611                | -0.831535 | -3.448091 |
| 22               | 1                | 0              | 1.326295                | -1.794450 | -1.915315 |
| 23               | 6                | 0              | -1.955144               | 0.011589  | -2.750503 |
| 24               | 6                | 0              | -1.012629               | -0.204100 | -3.748036 |
| 25               | 1                | 0              | 0.939289                | -1.016382 | -4.216562 |
| 26               | 1                | 0              | -2.876798               | 0.511621  | -3.016712 |
| 27               | 1                | 0              | -1.227542               | 0.126637  | -4.760439 |
| 28               | 7                | 0              | -2.740664               | -0.124744 | -0.469072 |
| 29               | 6                | 0              | -4.043367               | 0.408715  | -0.898736 |
| 30               | 1                | 0              | -4.542547               | -0.289761 | -1.578878 |
| 31               | 1                | 0              | -3.936543               | 1.369769  | -1.427005 |
| 32               | 6                | 0              | -4.797574               | 0.625097  | 0.412637  |
| 33               | 1                | 0              | -5.213254               | -0.322126 | 0.774129  |
| 34               | 1                | 0              | -5.618040               | 1.338848  | 0.303914  |
| 35               | 6                | 0              | -2.487297               | 0.232985  | 0.942418  |
| 36               | 6                | 0              | 1.024328                | -1.678229 | 0.871897  |
| 37               | 6                | 0              | 1.221322                | -2.449401 | 2.031941  |
| 38               | 6                | 0              | -0.228529               | -1.737294 | 0.202346  |

|    |   |   |           |           |          |
|----|---|---|-----------|-----------|----------|
| 39 | 6 | 0 | 0.222214  | -3.270642 | 2.546661 |
| 40 | 1 | 0 | 2.181766  | -2.392154 | 2.535364 |
| 41 | 6 | 0 | -1.212715 | -2.594311 | 0.732135 |
| 42 | 6 | 0 | -1.002457 | -3.347896 | 1.883204 |
| 43 | 1 | 0 | 0.402865  | -3.847915 | 3.448009 |
| 44 | 1 | 0 | -2.162004 | -2.668333 | 0.211542 |
| 45 | 1 | 0 | -1.789454 | -3.998075 | 2.253470 |
| 46 | 6 | 0 | -3.680541 | 1.113694  | 1.343199 |
| 47 | 1 | 0 | -3.458857 | 2.167477  | 1.143735 |
| 48 | 1 | 0 | -3.921538 | 1.016884  | 2.404982 |
| 49 | 1 | 0 | -1.534046 | 0.758744  | 1.041570 |
| 50 | 1 | 0 | -2.437617 | -0.658745 | 1.575432 |

-----  
1604aad\_model3\_PhPhPh\_pyrrolidine\_CN2\_ZW\_int\_b3lyp631dp\_PCMdmso\_TS\_CH\_f.log

Standard orientation:

| Center<br>Number | Atomic<br>Number | Atomic<br>Type | Coordinates (Angstroms) |           |           |
|------------------|------------------|----------------|-------------------------|-----------|-----------|
|                  |                  |                | X                       | Y         | Z         |
| 1                | 6                | 0              | 0.533367                | -1.666137 | -3.524105 |
| 2                | 6                | 0              | 1.158350                | -0.658699 | -2.795365 |
| 3                | 6                | 0              | 1.020930                | -0.569855 | -1.399370 |
| 4                | 6                | 0              | 0.215384                | -1.511740 | -0.726616 |
| 5                | 6                | 0              | -0.412738               | -2.519212 | -1.479024 |
| 6                | 6                | 0              | -0.257702               | -2.604963 | -2.860064 |
| 7                | 1                | 0              | 0.659911                | -1.713736 | -4.601234 |
| 8                | 1                | 0              | 1.772820                | 0.074603  | -3.310035 |
| 9                | 1                | 0              | -1.032266               | -3.244456 | -0.960508 |
| 10               | 1                | 0              | -0.754885               | -3.395839 | -3.413263 |
| 11               | 6                | 0              | 1.768197                | 0.559173  | -0.727222 |
| 12               | 6                | 0              | 3.107010                | 0.333148  | -0.232867 |
| 13               | 1                | 0              | 0.965053                | 0.979558  | 0.203235  |
| 14               | 6                | 0              | 3.970532                | 1.432659  | -0.019085 |
| 15               | 7                | 0              | 4.675180                | 2.352092  | 0.153285  |
| 16               | 6                | 0              | 3.634296                | -0.945709 | 0.046069  |
| 17               | 7                | 0              | 4.108676                | -1.996868 | 0.250674  |
| 18               | 6                | 0              | -2.235349               | -0.268383 | 0.505392  |
| 19               | 6                | 0              | -3.393424               | -1.021723 | 0.263919  |
| 20               | 6                | 0              | -2.179348               | 1.058095  | -0.002092 |
| 21               | 6                | 0              | -4.473761               | -0.530014 | -0.465151 |
| 22               | 1                | 0              | -3.430088               | -2.030911 | 0.662330  |
| 23               | 6                | 0              | -3.278142               | 1.546053  | -0.738461 |
| 24               | 6                | 0              | -4.406346               | 0.765847  | -0.969257 |
| 25               | 1                | 0              | -5.347853               | -1.150279 | -0.633811 |
| 26               | 1                | 0              | -3.264722               | 2.553365  | -1.130666 |
| 27               | 1                | 0              | -5.229943               | 1.182271  | -1.540503 |
| 28               | 7                | 0              | -1.091034               | 1.941171  | 0.203513  |
| 29               | 6                | 0              | -1.081741               | 3.297133  | -0.410645 |
| 30               | 1                | 0              | -1.890807               | 3.887095  | 0.033384  |
| 31               | 1                | 0              | -1.253664               | 3.230746  | -1.487243 |
| 32               | 6                | 0              | 0.300704                | 3.866789  | -0.065848 |
| 33               | 1                | 0              | 0.255235                | 4.937619  | 0.138228  |
| 34               | 1                | 0              | 0.992330                | 3.717076  | -0.899273 |
| 35               | 6                | 0              | 0.036701                | 1.725123  | 0.948925  |
| 36               | 6                | 0              | -0.016629               | -1.514191 | 0.757859  |
| 37               | 6                | 0              | 0.888932                | -2.180730 | 1.596634  |
| 38               | 6                | 0              | -1.176427               | -0.942352 | 1.327803  |
| 39               | 6                | 0              | 0.671121                | -2.276790 | 2.971275  |
| 40               | 1                | 0              | 1.773097                | -2.631867 | 1.161758  |
| 41               | 6                | 0              | -1.393001               | -1.062939 | 2.710201  |
| 42               | 6                | 0              | -0.476384               | -1.717628 | 3.531983  |
| 43               | 1                | 0              | 1.391707                | -2.795251 | 3.596450  |
| 44               | 1                | 0              | -2.290086               | -0.626498 | 3.138929  |
| 45               | 1                | 0              | -0.661987               | -1.792395 | 4.599085  |
| 46               | 6                | 0              | 0.743552                | 3.045707  | 1.156107  |
| 47               | 1                | 0              | 1.825785                | 2.936227  | 1.249097  |
| 48               | 1                | 0              | 0.374487                | 3.485877  | 2.091214  |
| 49               | 1                | 0              | 1.713566                | 1.475307  | -1.320447 |
| 50               | 1                | 0              | -0.025935               | 1.014738  | 1.764996  |

-----  
1605aad\_model3\_PhPhPh\_pyrrolidine\_CN2\_ZW\_int\_b3lyp631dp\_PCMdmso.log

Standard orientation:

| Center<br>Number | Atomic<br>Number | Atomic<br>Type | Coordinates (Angstroms) |           |           |
|------------------|------------------|----------------|-------------------------|-----------|-----------|
|                  |                  |                | X                       | Y         | Z         |
| 1                | 6                | 0              | 4.303971                | -1.753289 | -0.415623 |
| 2                | 6                | 0              | 3.447572                | -0.981343 | -1.200644 |
| 3                | 6                | 0              | 2.303439                | -0.367198 | -0.671406 |
| 4                | 6                | 0              | 2.009783                | -0.555639 | 0.697781  |
| 5                | 6                | 0              | 2.887653                | -1.323420 | 1.482440  |
| 6                | 6                | 0              | 4.024448                | -1.922185 | 0.939209  |
| 7                | 1                | 0              | 5.181990                | -2.213459 | -0.859399 |
| 8                | 1                | 0              | 3.670893                | -0.840247 | -2.255135 |
| 9                | 1                | 0              | 2.661931                | -1.459389 | 2.536472  |
| 10               | 1                | 0              | 4.679630                | -2.514861 | 1.570532  |
| 11               | 6                | 0              | 1.474804                | 0.520071  | -1.585498 |
| 12               | 6                | 0              | 1.708731                | 2.019580  | -1.391343 |
| 13               | 1                | 0              | 0.410838                | 0.317481  | -1.437536 |
| 14               | 6                | 0              | 2.969809                | 2.571749  | -1.626120 |
| 15               | 7                | 0              | 4.043394                | 3.011382  | -1.832661 |
| 16               | 6                | 0              | 0.658961                | 2.847982  | -1.008174 |
| 17               | 7                | 0              | -0.266980               | 3.508525  | -0.688085 |
| 18               | 6                | 0              | -0.928389               | -1.445567 | 0.346532  |
| 19               | 6                | 0              | -0.249455               | -2.675757 | 0.332272  |
| 20               | 6                | 0              | -2.032555               | -1.328729 | -0.532449 |
| 21               | 6                | 0              | -0.621758               | -3.722725 | -0.507126 |
| 22               | 1                | 0              | 0.581265                | -2.811319 | 1.013185  |
| 23               | 6                | 0              | -2.413429               | -2.376670 | -1.376971 |
| 24               | 6                | 0              | -1.704143               | -3.573033 | -1.372575 |
| 25               | 1                | 0              | -0.069621               | -4.656317 | -0.476671 |
| 26               | 1                | 0              | -3.252326               | -2.250651 | -2.051154 |
| 27               | 1                | 0              | -2.001879               | -4.377809 | -2.035726 |
| 28               | 7                | 0              | -2.851638               | -0.138338 | -0.587988 |
| 29               | 6                | 0              | -4.352302               | -0.231625 | -0.603017 |
| 30               | 1                | 0              | -4.664979               | -0.958298 | 0.146864  |
| 31               | 1                | 0              | -4.655748               | -0.586227 | -1.590486 |
| 32               | 6                | 0              | -4.796439               | 1.213400  | -0.324338 |
| 33               | 1                | 0              | -5.043712               | 1.332833  | 0.732471  |
| 34               | 1                | 0              | -5.672253               | 1.483749  | -0.913883 |
| 35               | 6                | 0              | -2.446136               | 1.087123  | -0.644593 |
| 36               | 6                | 0              | 0.840878                | 0.059899  | 1.417136  |
| 37               | 6                | 0              | 1.137733                | 1.063729  | 2.355574  |
| 38               | 6                | 0              | -0.504466               | -0.376422 | 1.303531  |
| 39               | 6                | 0              | 0.161121                | 1.626056  | 3.173144  |
| 40               | 1                | 0              | 2.165882                | 1.401903  | 2.437525  |
| 41               | 6                | 0              | -1.472016               | 0.176077  | 2.164414  |
| 42               | 6                | 0              | -1.152999               | 1.166907  | 3.087856  |
| 43               | 1                | 0              | 0.429047                | 2.402898  | 3.882526  |
| 44               | 1                | 0              | -2.488513               | -0.203064 | 2.128166  |
| 45               | 1                | 0              | -1.923200               | 1.566993  | 3.739627  |
| 46               | 6                | 0              | -3.557252               | 2.067517  | -0.676529 |
| 47               | 1                | 0              | -3.597226               | 2.499826  | -1.686050 |
| 48               | 1                | 0              | -3.362237               | 2.898485  | 0.006606  |
| 49               | 1                | 0              | 1.687942                | 0.226204  | -2.622121 |
| 50               | 1                | 0              | -1.396531               | 1.351354  | -0.685590 |

1609aaa\_model3\_PhPhPh\_pyrrolidine\_CN2\_PRODUCT\_b3lyp631dp\_PCMdms0.log

Standard orientation:

| Center<br>Number | Atomic<br>Number | Atomic<br>Type | Coordinates (Angstroms) |           |           |
|------------------|------------------|----------------|-------------------------|-----------|-----------|
|                  |                  |                | X                       | Y         | Z         |
| 1                | 6                | 0              | 4.187233                | -1.520490 | 1.292338  |
| 2                | 6                | 0              | 2.827993                | -1.813363 | 1.357097  |
| 3                | 6                | 0              | 1.849550                | -1.012026 | 0.744446  |
| 4                | 6                | 0              | 2.265596                | 0.126810  | 0.001727  |
| 5                | 6                | 0              | 3.646306                | 0.415844  | -0.024373 |
| 6                | 6                | 0              | 4.597340                | -0.378382 | 0.609669  |
| 7                | 1                | 0              | 4.908226                | -2.166330 | 1.783742  |
| 8                | 1                | 0              | 2.503282                | -2.687309 | 1.914944  |
| 9                | 1                | 0              | 3.974896                | 1.300239  | -0.560306 |
| 10               | 1                | 0              | 5.647035                | -0.104601 | 0.564479  |
| 11               | 6                | 0              | 0.413394                | -1.358386 | 1.082311  |
| 12               | 6                | 0              | -0.594632               | -1.952851 | 0.012658  |
| 13               | 1                | 0              | -0.058260               | -0.471277 | 1.489057  |

|    |   |   |           |           |           |
|----|---|---|-----------|-----------|-----------|
| 14 | 6 | 0 | -0.671041 | -3.416309 | 0.210751  |
| 15 | 7 | 0 | -0.748949 | -4.558991 | 0.400733  |
| 16 | 6 | 0 | -0.207212 | -1.754731 | -1.394467 |
| 17 | 7 | 0 | 0.051890  | -1.681304 | -2.523075 |
| 18 | 6 | 0 | -0.401448 | 1.765181  | 0.794080  |
| 19 | 6 | 0 | 0.077913  | 2.584830  | 1.823726  |
| 20 | 6 | 0 | -1.589276 | 1.029023  | 1.002347  |
| 21 | 6 | 0 | -0.610165 | 2.692739  | 3.033895  |
| 22 | 1 | 0 | 0.993009  | 3.148337  | 1.667671  |
| 23 | 6 | 0 | -2.284818 | 1.159752  | 2.211119  |
| 24 | 6 | 0 | -1.799751 | 1.988027  | 3.224176  |
| 25 | 1 | 0 | -0.222313 | 3.332582  | 3.820654  |
| 26 | 1 | 0 | -3.200331 | 0.594580  | 2.362554  |
| 27 | 1 | 0 | -2.345135 | 2.076313  | 4.158898  |
| 28 | 7 | 0 | -2.025604 | 0.113947  | -0.017742 |
| 29 | 6 | 0 | -3.230002 | 0.481696  | -0.783562 |
| 30 | 1 | 0 | -3.023395 | 1.357676  | -1.405688 |
| 31 | 1 | 0 | -4.077021 | 0.728052  | -0.122422 |
| 32 | 6 | 0 | -3.520312 | -0.779245 | -1.594444 |
| 33 | 1 | 0 | -2.866529 | -0.819938 | -2.470231 |
| 34 | 1 | 0 | -4.556565 | -0.829248 | -1.936869 |
| 35 | 6 | 0 | -2.038419 | -1.320823 | 0.277726  |
| 36 | 6 | 0 | 1.424897  | 1.007769  | -0.889154 |
| 37 | 6 | 0 | 1.913735  | 1.139967  | -2.208592 |
| 38 | 6 | 0 | 0.265465  | 1.741907  | -0.547384 |
| 39 | 6 | 0 | 1.312275  | 1.959577  | -3.155911 |
| 40 | 1 | 0 | 2.784443  | 0.559738  | -2.494786 |
| 41 | 6 | 0 | -0.326408 | 2.575105  | -1.516027 |
| 42 | 6 | 0 | 0.179472  | 2.693460  | -2.805589 |
| 43 | 1 | 0 | 1.725442  | 2.021070  | -4.158132 |
| 44 | 1 | 0 | -1.199951 | 3.153058  | -1.229558 |
| 45 | 1 | 0 | -0.304031 | 3.349002  | -3.523466 |
| 46 | 6 | 0 | -3.171459 | -1.902654 | -0.602336 |
| 47 | 1 | 0 | -4.030644 | -2.121542 | 0.038139  |
| 48 | 1 | 0 | -2.891047 | -2.837018 | -1.095055 |
| 49 | 1 | 0 | 0.426088  | -2.080575 | 1.900526  |
| 50 | 1 | 0 | -2.225922 | -1.532934 | 1.339072  |

1611aab\_model2\_PhPh\_pyrrolidine\_CN2\_PRODUCT\_b3lyp631dp\_PCMDmso.log

Standard orientation:

| Center<br>Number | Atomic<br>Number | Atomic<br>Type | Coordinates (Angstroms) |           |           |
|------------------|------------------|----------------|-------------------------|-----------|-----------|
|                  |                  |                | X                       | Y         | Z         |
| 1                | 6                | 0              | -1.072711               | -0.731243 | 3.704543  |
| 2                | 6                | 0              | -1.679950               | -1.074085 | 2.494685  |
| 3                | 6                | 0              | -0.912166               | -1.338150 | 1.354593  |
| 4                | 6                | 0              | 0.496772                | -1.290577 | 1.446250  |
| 5                | 6                | 0              | 1.095222                | -0.950073 | 2.662995  |
| 6                | 6                | 0              | 0.317721                | -0.662909 | 3.787457  |
| 7                | 1                | 0              | -1.684661               | -0.527700 | 4.578100  |
| 8                | 1                | 0              | -2.763042               | -1.137390 | 2.436942  |
| 9                | 1                | 0              | 2.178654                | -0.916769 | 2.729007  |
| 10               | 1                | 0              | 0.798356                | -0.402651 | 4.725779  |
| 11               | 6                | 0              | -1.579731               | -1.703476 | 0.045152  |
| 12               | 6                | 0              | -2.107493               | -0.505991 | -0.845097 |
| 13               | 1                | 0              | -2.440690               | -2.352013 | 0.230390  |
| 14               | 6                | 0              | -3.377348               | -0.012909 | -0.264772 |
| 15               | 7                | 0              | -4.397492               | 0.309453  | 0.185717  |
| 16               | 6                | 0              | -2.473604               | -1.088060 | -2.156059 |
| 17               | 7                | 0              | -2.725523               | -1.559324 | -3.186154 |
| 18               | 6                | 0              | 1.990954                | 0.772162  | -0.311870 |
| 19               | 6                | 0              | 3.303568                | 1.285534  | -0.322378 |
| 20               | 6                | 0              | 0.917524                | 1.673854  | -0.064467 |
| 21               | 6                | 0              | 3.598938                | 2.624986  | -0.095496 |
| 22               | 1                | 0              | 4.116875                | 0.586712  | -0.489991 |
| 23               | 6                | 0              | 1.236559                | 3.034919  | 0.128421  |
| 24               | 6                | 0              | 2.545016                | 3.506760  | 0.126105  |
| 25               | 1                | 0              | 4.628776                | 2.967363  | -0.094423 |
| 26               | 1                | 0              | 0.443704                | 3.757889  | 0.265167  |
| 27               | 1                | 0              | 2.728788                | 4.565325  | 0.284414  |
| 28               | 7                | 0              | -0.441194               | 1.244376  | 0.029623  |
| 29               | 6                | 0              | -1.063922               | 0.665480  | -1.164444 |
| 30               | 1                | 0              | -0.891568               | -2.265841 | -0.584419 |

|    |   |   |           |           |           |
|----|---|---|-----------|-----------|-----------|
| 31 | 6 | 0 | 1.321002  | -1.654378 | 0.252798  |
| 32 | 6 | 0 | 1.473966  | -3.020548 | -0.040753 |
| 33 | 6 | 0 | 1.901877  | -0.696186 | -0.605956 |
| 34 | 6 | 0 | 2.155501  | -3.456348 | -1.174627 |
| 35 | 1 | 0 | 1.039478  | -3.747947 | 0.639209  |
| 36 | 6 | 0 | 2.570789  | -1.157384 | -1.758750 |
| 37 | 6 | 0 | 2.693607  | -2.512984 | -2.050052 |
| 38 | 1 | 0 | 2.256543  | -4.518690 | -1.374458 |
| 39 | 1 | 0 | 3.001643  | -0.426083 | -2.435495 |
| 40 | 1 | 0 | 3.211876  | -2.827914 | -2.950672 |
| 41 | 6 | 0 | -1.437921 | 2.206117  | 0.541391  |
| 42 | 1 | 0 | -0.988668 | 2.909527  | 1.238519  |
| 43 | 1 | 0 | -2.178674 | 1.643877  | 1.114725  |
| 44 | 6 | 0 | -1.768117 | 1.866077  | -1.859333 |
| 45 | 1 | 0 | -1.064636 | 2.311459  | -2.566931 |
| 46 | 1 | 0 | -2.652848 | 1.571835  | -2.430640 |
| 47 | 6 | 0 | -2.090111 | 2.855140  | -0.705202 |
| 48 | 1 | 0 | -1.658553 | 3.837848  | -0.912055 |
| 49 | 1 | 0 | -3.164560 | 2.991107  | -0.564528 |
| 50 | 1 | 0 | -0.302982 | 0.204149  | -1.793762 |

1611aad\_model2\_PhPh\_pyrrolidine\_CN2\_PRODUCT\_b3lyp631dp\_PCMdms0.log

Standard orientation:

| Center<br>Number | Atomic<br>Number | Atomic<br>Type | Coordinates (Angstroms) |           |           |
|------------------|------------------|----------------|-------------------------|-----------|-----------|
|                  |                  |                | X                       | Y         | Z         |
| 1                | 6                | 0              | 2.262542                | -2.935975 | 1.950298  |
| 2                | 6                | 0              | 1.054140                | -2.942205 | 1.258076  |
| 3                | 6                | 0              | 0.822013                | -2.077443 | 0.176137  |
| 4                | 6                | 0              | 1.843722                | -1.185132 | -0.213196 |
| 5                | 6                | 0              | 3.063189                | -1.201136 | 0.481116  |
| 6                | 6                | 0              | 3.276590                | -2.063061 | 1.554905  |
| 7                | 1                | 0              | 2.414863                | -3.617508 | 2.781476  |
| 8                | 1                | 0              | 0.275511                | -3.641260 | 1.550341  |
| 9                | 1                | 0              | 3.852261                | -0.524808 | 0.167510  |
| 10               | 1                | 0              | 4.229852                | -2.055754 | 2.074684  |
| 11               | 6                | 0              | -0.491750               | -2.210524 | -0.570508 |
| 12               | 6                | 0              | -1.713944               | -1.324021 | -0.070897 |
| 13               | 1                | 0              | -0.809199               | -3.253574 | -0.505516 |
| 14               | 6                | 0              | -1.759606               | -1.273246 | 1.400765  |
| 15               | 7                | 0              | -1.805638               | -1.244994 | 2.560013  |
| 16               | 6                | 0              | -2.934496               | -2.035082 | -0.497732 |
| 17               | 7                | 0              | -3.873480               | -2.622651 | -0.846750 |
| 18               | 6                | 0              | 0.977298                | 1.620005  | 0.244142  |
| 19               | 6                | 0              | 2.091252                | 2.155035  | 0.909188  |
| 20               | 6                | 0              | -0.296499               | 1.689114  | 0.874972  |
| 21               | 6                | 0              | 2.001883                | 2.769479  | 2.155556  |
| 22               | 1                | 0              | 3.053030                | 2.100853  | 0.407222  |
| 23               | 6                | 0              | -0.370497               | 2.320768  | 2.138230  |
| 24               | 6                | 0              | 0.750828                | 2.853718  | 2.764239  |
| 25               | 1                | 0              | 2.886720                | 3.179065  | 2.631963  |
| 26               | 1                | 0              | -1.325074               | 2.382601  | 2.644829  |
| 27               | 1                | 0              | 0.639948                | 3.327245  | 3.735556  |
| 28               | 7                | 0              | -1.491881               | 1.226970  | 0.306173  |
| 29               | 6                | 0              | -1.660599               | 0.195815  | -0.691144 |
| 30               | 1                | 0              | -0.371871               | -1.980372 | -1.631660 |
| 31               | 6                | 0              | 1.675188                | -0.232517 | -1.357231 |
| 32               | 6                | 0              | 1.960803                | -0.652980 | -2.664390 |
| 33               | 6                | 0              | 1.225489                | 1.088659  | -1.138024 |
| 34               | 6                | 0              | 1.799805                | 0.209438  | -3.749429 |
| 35               | 1                | 0              | 2.312004                | -1.667998 | -2.826648 |
| 36               | 6                | 0              | 1.074631                | 1.946625  | -2.238525 |
| 37               | 6                | 0              | 1.352955                | 1.513779  | -3.535357 |
| 38               | 1                | 0              | 2.024839                | -0.136042 | -4.753839 |
| 39               | 1                | 0              | 0.735504                | 2.964092  | -2.067699 |
| 40               | 1                | 0              | 1.227770                | 2.194703  | -4.371832 |
| 41               | 6                | 0              | -2.792642               | 1.788036  | 0.724693  |
| 42               | 1                | 0              | -2.746406               | 2.882024  | 0.667540  |
| 43               | 1                | 0              | -3.045777               | 1.520578  | 1.757094  |
| 44               | 6                | 0              | -2.949390               | 0.634692  | -1.402314 |
| 45               | 1                | 0              | -2.672280               | 1.433531  | -2.097241 |
| 46               | 1                | 0              | -3.432693               | -0.154500 | -1.979001 |
| 47               | 6                | 0              | -3.814326               | 1.189102  | -0.261312 |



|    |   |   |           |          |           |
|----|---|---|-----------|----------|-----------|
| 48 | 1 | 0 | -4.534889 | 1.934074 | -0.605236 |
| 49 | 1 | 0 | -4.380817 | 0.383039 | 0.215332  |
| 50 | 1 | 0 | -0.827781 | 0.169075 | -1.384450 |

1701aaa\_model3\_NaphtPh\_pyrrolidine\_CN2\_b3lyp631dp\_PCMdmsol.log

Standard orientation:

| Center<br>Number | Atomic<br>Number | Atomic<br>Type | Coordinates (Angstroms) |           |           |
|------------------|------------------|----------------|-------------------------|-----------|-----------|
|                  |                  |                | X                       | Y         | Z         |
| 1                | 6                | 0              | -3.632333               | -2.057760 | -0.959051 |
| 2                | 6                | 0              | -2.876833               | -3.050349 | -0.382643 |
| 3                | 6                | 0              | -1.605541               | -2.770104 | 0.187922  |
| 4                | 6                | 0              | -1.090812               | -1.426078 | 0.184605  |
| 5                | 6                | 0              | -1.883185               | -0.413637 | -0.482050 |
| 6                | 6                | 0              | -3.125684               | -0.746756 | -1.016802 |
| 7                | 1                | 0              | -1.261899               | -4.828424 | 0.748226  |
| 8                | 1                | 0              | -4.598879               | -2.279417 | -1.398754 |
| 9                | 1                | 0              | -3.240140               | -4.073599 | -0.355204 |
| 10               | 6                | 0              | -0.851832               | -3.823086 | 0.767949  |
| 11               | 6                | 0              | 0.155318                | -1.177023 | 0.855051  |
| 12               | 1                | 0              | -3.692943               | 0.006523  | -1.550820 |
| 13               | 6                | 0              | 0.850547                | -2.247170 | 1.403543  |
| 14               | 6                | 0              | 0.367766                | -3.569500 | 1.348625  |
| 15               | 1                | 0              | 1.787809                | -2.046514 | 1.913458  |
| 16               | 1                | 0              | 0.946670                | -4.372725 | 1.793410  |
| 17               | 6                | 0              | -1.367093               | 0.925906  | -0.746291 |
| 18               | 6                | 0              | -2.070753               | 2.099243  | -0.755841 |
| 19               | 1                | 0              | -0.320944               | 1.012135  | -1.014606 |
| 20               | 6                | 0              | -3.427021               | 2.236986  | -0.315424 |
| 21               | 7                | 0              | -4.521118               | 2.394873  | 0.049385  |
| 22               | 6                | 0              | -1.432475               | 3.314122  | -1.167487 |
| 23               | 7                | 0              | -0.921323               | 4.304979  | -1.501979 |
| 24               | 7                | 0              | 2.751222                | 0.004467  | -0.252898 |
| 25               | 6                | 0              | 4.079770                | 0.517890  | -0.621177 |
| 26               | 1                | 0              | 4.008222                | 1.520912  | -1.070106 |
| 27               | 1                | 0              | 4.726795                | 0.596013  | 0.259667  |
| 28               | 6                | 0              | 4.594711                | -0.490712 | -1.650545 |
| 29               | 6                | 0              | 2.289383                | -1.001203 | -1.228861 |
| 30               | 1                | 0              | 1.269455                | -0.792345 | -1.563872 |
| 31               | 1                | 0              | 2.287574                | -2.006577 | -0.791052 |
| 32               | 6                | 0              | 3.308381                | -0.910538 | -2.372407 |
| 33               | 1                | 0              | 3.399747                | -1.854379 | -2.915928 |
| 34               | 1                | 0              | 3.008166                | -0.135453 | -3.086412 |
| 35               | 1                | 0              | 5.046393                | -1.351521 | -1.145125 |
| 36               | 1                | 0              | 5.345224                | -0.054250 | -2.314057 |
| 37               | 6                | 0              | 0.689328                | 0.197725  | 1.122596  |
| 38               | 6                | 0              | -0.048750               | 0.981013  | 2.028398  |
| 39               | 6                | 0              | 1.952540                | 0.680597  | 0.653696  |
| 40               | 6                | 0              | 0.399844                | 2.208830  | 2.502077  |
| 41               | 1                | 0              | -0.996765               | 0.584919  | 2.381896  |
| 42               | 6                | 0              | 2.401015                | 1.925005  | 1.170195  |
| 43               | 6                | 0              | 1.644998                | 2.667796  | 2.067978  |
| 44               | 1                | 0              | -0.195435               | 2.779997  | 3.206694  |
| 45               | 1                | 0              | 3.356433                | 2.320488  | 0.851648  |
| 46               | 1                | 0              | 2.035319                | 3.616805  | 2.425049  |

1701aab\_model3\_NaphtPh\_pyrrolidine\_CN2\_b3lyp631dp\_PCMdmsol.log

Standard orientation:

| Center<br>Number | Atomic<br>Number | Atomic<br>Type | Coordinates (Angstroms) |           |           |
|------------------|------------------|----------------|-------------------------|-----------|-----------|
|                  |                  |                | X                       | Y         | Z         |
| 1                | 6                | 0              | 2.754482                | -2.822329 | -0.376992 |
| 2                | 6                | 0              | 3.607038                | -1.748722 | -0.285916 |
| 3                | 6                | 0              | 3.128928                | -0.417038 | -0.420898 |
| 4                | 6                | 0              | 1.729397                | -0.168992 | -0.646439 |
| 5                | 6                | 0              | 0.868876                | -1.320660 | -0.804499 |
| 6                | 6                | 0              | 1.391694                | -2.602527 | -0.649406 |
| 7                | 1                | 0              | 5.092831                | 0.447577  | -0.166278 |
| 8                | 1                | 0              | 3.125265                | -3.836899 | -0.277746 |
| 9                | 1                | 0              | 4.668153                | -1.900525 | -0.110562 |

|    |   |   |           |           |           |
|----|---|---|-----------|-----------|-----------|
| 10 | 6 | 0 | 4.041524  | 0.666133  | -0.328458 |
| 11 | 6 | 0 | 1.280391  | 1.195659  | -0.666267 |
| 12 | 1 | 0 | 0.748792  | -3.460007 | -0.811763 |
| 13 | 6 | 0 | 2.221109  | 2.214388  | -0.595403 |
| 14 | 6 | 0 | 3.599010  | 1.961947  | -0.441139 |
| 15 | 1 | 0 | 1.871414  | 3.241655  | -0.625414 |
| 16 | 1 | 0 | 4.295441  | 2.792303  | -0.381324 |
| 17 | 6 | 0 | -0.506979 | -1.213984 | -1.284301 |
| 18 | 6 | 0 | -1.570342 | -1.968169 | -0.872885 |
| 19 | 1 | 0 | -0.705629 | -0.509625 | -2.084057 |
| 20 | 6 | 0 | -1.542601 | -2.847257 | 0.258598  |
| 21 | 7 | 0 | -1.568933 | -3.551126 | 1.185588  |
| 22 | 6 | 0 | -2.835908 | -1.857141 | -1.535406 |
| 23 | 7 | 0 | -3.867571 | -1.778194 | -2.068449 |
| 24 | 7 | 0 | -0.842178 | 0.834314  | 1.465064  |
| 25 | 6 | 0 | -1.917518 | 0.478053  | 2.402360  |
| 26 | 1 | 0 | -2.539083 | 1.349928  | 2.664585  |
| 27 | 1 | 0 | -2.575908 | -0.280037 | 1.965681  |
| 28 | 6 | 0 | -1.164077 | -0.014125 | 3.637298  |
| 29 | 6 | 0 | 0.408846  | 1.124490  | 2.207089  |
| 30 | 1 | 0 | 0.768220  | 2.135068  | 1.989279  |
| 31 | 1 | 0 | 1.201575  | 0.423636  | 1.927462  |
| 32 | 6 | 0 | 0.027973  | 0.950567  | 3.687114  |
| 33 | 1 | 0 | 0.865177  | 0.580606  | 4.284568  |
| 34 | 1 | 0 | -0.289266 | 1.909563  | 4.111475  |
| 35 | 1 | 0 | -0.822710 | -1.043901 | 3.483967  |
| 36 | 1 | 0 | -1.782257 | 0.011571  | 4.538168  |
| 37 | 6 | 0 | -0.158985 | 1.590812  | -0.793915 |
| 38 | 6 | 0 | -0.540662 | 2.203100  | -1.999536 |
| 39 | 6 | 0 | -1.141632 | 1.384435  | 0.224389  |
| 40 | 6 | 0 | -1.859451 | 2.554876  | -2.275508 |
| 41 | 1 | 0 | 0.227659  | 2.365987  | -2.750145 |
| 42 | 6 | 0 | -2.480509 | 1.723586  | -0.088978 |
| 43 | 6 | 0 | -2.831649 | 2.288709  | -1.310334 |
| 44 | 1 | 0 | -2.121835 | 3.009558  | -3.225116 |
| 45 | 1 | 0 | -3.257839 | 1.558125  | 0.645886  |
| 46 | 1 | 0 | -3.872932 | 2.535609  | -1.497505 |

1704aab\_model3\_NaphtPh\_pyrrolidine\_CN2\_ZW\_int\_b3lyp631dp\_PCMdmsO\_TS\_CH\_f2.log

Standard orientation:

| Center<br>Number | Atomic<br>Number | Atomic<br>Type | Coordinates (Angstroms) |           |           |
|------------------|------------------|----------------|-------------------------|-----------|-----------|
|                  |                  |                | X                       | Y         | Z         |
| 1                | 6                | 0              | 3.598853                | -1.885241 | -0.048382 |
| 2                | 6                | 0              | 3.912825                | -0.654684 | 0.464393  |
| 3                | 6                | 0              | 2.903973                | 0.308724  | 0.731361  |
| 4                | 6                | 0              | 1.501307                | 0.028332  | 0.479913  |
| 5                | 6                | 0              | 1.209998                | -1.300939 | -0.024318 |
| 6                | 6                | 0              | 2.247888                | -2.186054 | -0.291581 |
| 7                | 1                | 0              | 4.393568                | 1.706832  | 1.423623  |
| 8                | 1                | 0              | 4.367608                | -2.620365 | -0.262225 |
| 9                | 1                | 0              | 4.944262                | -0.385583 | 0.672046  |
| 10               | 6                | 0              | 3.331571                | 1.557735  | 1.252836  |
| 11               | 6                | 0              | 0.572776                | 1.110568  | 0.759660  |
| 12               | 1                | 0              | 1.999605                | -3.165610 | -0.688462 |
| 13               | 6                | 0              | 1.065896                | 2.307652  | 1.274030  |
| 14               | 6                | 0              | 2.427664                | 2.547075  | 1.530106  |
| 15               | 1                | 0              | 0.357249                | 3.104395  | 1.473092  |
| 16               | 1                | 0              | 2.743694                | 3.505240  | 1.929460  |
| 17               | 6                | 0              | -0.143584               | -1.881744 | -0.325957 |
| 18               | 6                | 0              | -1.086853               | -2.160178 | 0.741808  |
| 19               | 1                | 0              | -0.052818               | -2.735159 | -1.002346 |
| 20               | 6                | 0              | -0.900672               | -1.735953 | 2.071605  |
| 21               | 7                | 0              | -0.735465               | -1.437296 | 3.192913  |
| 22               | 6                | 0              | -2.193668               | -2.997425 | 0.484113  |
| 23               | 7                | 0              | -3.110613               | -3.688988 | 0.251375  |
| 24               | 7                | 0              | -0.930355               | 0.959337  | -1.857816 |
| 25               | 6                | 0              | 0.187424                | 1.707767  | -2.470069 |
| 26               | 1                | 0              | -0.230259               | 2.490666  | -3.114005 |
| 27               | 1                | 0              | 0.801108                | 2.186748  | -1.704744 |
| 28               | 6                | 0              | 0.942763                | 0.628442  | -3.270321 |
| 29               | 6                | 0              | -1.031524               | -0.319031 | -2.308296 |
| 30               | 1                | 0              | -2.021229               | -0.779224 | -2.293991 |

|    |   |   |           |           |           |
|----|---|---|-----------|-----------|-----------|
| 31 | 6 | 0 | -0.095779 | -0.497900 | -3.479916 |
| 32 | 1 | 0 | 0.344864  | -1.497281 | -3.515218 |
| 33 | 1 | 0 | -0.667509 | -0.361815 | -4.406305 |
| 34 | 1 | 0 | 1.784634  | 0.253213  | -2.683146 |
| 35 | 1 | 0 | 1.333327  | 1.016582  | -4.212385 |
| 36 | 6 | 0 | -0.927903 | 1.179063  | 0.595947  |
| 37 | 6 | 0 | -1.698124 | 1.386376  | 1.754493  |
| 38 | 6 | 0 | -1.601630 | 1.285808  | -0.638973 |
| 39 | 6 | 0 | -3.061396 | 1.669938  | 1.697646  |
| 40 | 1 | 0 | -1.208322 | 1.300705  | 2.717696  |
| 41 | 6 | 0 | -2.965950 | 1.584245  | -0.702322 |
| 42 | 6 | 0 | -3.701653 | 1.779814  | 0.463718  |
| 43 | 1 | 0 | -3.617940 | 1.812302  | 2.618733  |
| 44 | 1 | 0 | -3.436549 | 1.656113  | -1.677628 |
| 45 | 1 | 0 | -4.760230 | 2.011799  | 0.406668  |
| 46 | 1 | 0 | -0.605251 | -1.105273 | -1.235136 |

1705aab\_model3\_NaphtPh\_pyrrolidine\_CN2\_ZW\_int\_b3lyp631dp\_PCMdms0.log

Standard orientation:

| Center<br>Number | Atomic<br>Number | Atomic<br>Type | Coordinates (Angstroms) |           |           |
|------------------|------------------|----------------|-------------------------|-----------|-----------|
|                  |                  |                | X                       | Y         | Z         |
| 1                | 6                | 0              | 2.246763                | 3.317953  | -1.143473 |
| 2                | 6                | 0              | 1.355695                | 3.774054  | -0.203913 |
| 3                | 6                | 0              | 0.488329                | 2.874141  | 0.467155  |
| 4                | 6                | 0              | 0.532709                | 1.454359  | 0.182630  |
| 5                | 6                | 0              | 1.478456                | 1.008085  | -0.811457 |
| 6                | 6                | 0              | 2.293130                | 1.941865  | -1.433930 |
| 7                | 1                | 0              | -0.423077               | 4.469966  | 1.599772  |
| 8                | 1                | 0              | 2.908081                | 4.004622  | -1.662852 |
| 9                | 1                | 0              | 1.293562                | 4.830783  | 0.039789  |
| 10               | 6                | 0              | -0.427102               | 3.398802  | 1.418848  |
| 11               | 6                | 0              | -0.399274               | 0.623458  | 0.913349  |
| 12               | 1                | 0              | 3.003575                | 1.584877  | -2.174558 |
| 13               | 6                | 0              | -1.270364               | 1.193788  | 1.830031  |
| 14               | 6                | 0              | -1.295964               | 2.578804  | 2.091013  |
| 15               | 1                | 0              | -1.951140               | 0.544136  | 2.372166  |
| 16               | 1                | 0              | -1.994803               | 2.978859  | 2.818497  |
| 17               | 6                | 0              | 1.695985                | -0.436078 | -1.241011 |
| 18               | 6                | 0              | 2.909308                | -1.095428 | -0.577049 |
| 19               | 1                | 0              | 1.861140                | -0.430583 | -2.325011 |
| 20               | 6                | 0              | 3.405905                | -0.670605 | 0.654524  |
| 21               | 7                | 0              | 3.817455                | -0.301480 | 1.697114  |
| 22               | 6                | 0              | 3.498997                | -2.202876 | -1.190022 |
| 23               | 7                | 0              | 3.981426                | -3.130705 | -1.734678 |
| 24               | 7                | 0              | -2.564964               | -0.768801 | -0.563933 |
| 25               | 6                | 0              | -4.034383               | -1.044431 | -0.431345 |
| 26               | 1                | 0              | -4.249192               | -1.972061 | -0.966851 |
| 27               | 1                | 0              | -4.269576               | -1.177923 | 0.624359  |
| 28               | 6                | 0              | -4.680853               | 0.188993  | -1.082762 |
| 29               | 6                | 0              | -2.326667               | 0.192751  | -1.393693 |
| 30               | 1                | 0              | -1.311072               | 0.477553  | -1.640419 |
| 31               | 6                | 0              | -3.559923               | 0.789944  | -1.963133 |
| 32               | 1                | 0              | -3.512897               | 1.882500  | -1.952096 |
| 33               | 1                | 0              | -3.628441               | 0.490975  | -3.018317 |
| 34               | 1                | 0              | -4.975401               | 0.906581  | -0.314434 |
| 35               | 1                | 0              | -5.565592               | -0.079257 | -1.659676 |
| 36               | 6                | 0              | -0.508845               | -0.873086 | 0.817681  |
| 37               | 6                | 0              | 0.378324                | -1.682118 | 1.543715  |
| 38               | 6                | 0              | -1.585471               | -1.522263 | 0.174642  |
| 39               | 6                | 0              | 0.217427                | -3.065261 | 1.610590  |
| 40               | 1                | 0              | 1.203118                | -1.207702 | 2.063247  |
| 41               | 6                | 0              | -1.758432               | -2.907861 | 0.241717  |
| 42               | 6                | 0              | -0.849118               | -3.682007 | 0.956588  |
| 43               | 1                | 0              | 0.923262                | -3.659630 | 2.181747  |
| 44               | 1                | 0              | -2.587035               | -3.379750 | -0.273412 |
| 45               | 1                | 0              | -0.979321               | -4.757761 | 1.002327  |
| 46               | 1                | 0              | 0.789602                | -1.029181 | -1.087969 |

1705aac\_model3\_NaphtPh\_pyrrolidine\_CN2\_ZW\_int\_b3lyp631dp\_PCMdms0.log

Standard orientation:

| Center<br>Number | Atomic<br>Number | Atomic<br>Type | Coordinates (Angstroms) |           |           |
|------------------|------------------|----------------|-------------------------|-----------|-----------|
|                  |                  |                | X                       | Y         | Z         |
| 1                | 6                | 0              | 3.851640                | 1.805456  | 0.066477  |
| 2                | 6                | 0              | 2.961373                | 2.848852  | 0.141144  |
| 3                | 6                | 0              | 1.579395                | 2.633216  | -0.091089 |
| 4                | 6                | 0              | 1.084693                | 1.314162  | -0.430586 |
| 5                | 6                | 0              | 2.030947                | 0.224914  | -0.407193 |
| 6                | 6                | 0              | 3.370223                | 0.507820  | -0.184210 |
| 7                | 1                | 0              | 1.105950                | 4.704283  | 0.292510  |
| 8                | 1                | 0              | 4.912863                | 1.967724  | 0.229258  |
| 9                | 1                | 0              | 3.296648                | 3.854489  | 0.378312  |
| 10               | 6                | 0              | 0.691934                | 3.738031  | 0.018234  |
| 11               | 6                | 0              | -0.324767               | 1.223649  | -0.750979 |
| 12               | 1                | 0              | 4.070679                | -0.322128 | -0.169005 |
| 13               | 6                | 0              | -1.141839               | 2.337836  | -0.626670 |
| 14               | 6                | 0              | -0.650632               | 3.594776  | -0.219403 |
| 15               | 1                | 0              | -2.188968               | 2.250269  | -0.900887 |
| 16               | 1                | 0              | -1.327883               | 4.438500  | -0.135480 |
| 17               | 6                | 0              | 1.686648                | -1.265773 | -0.537099 |
| 18               | 6                | 0              | 2.140322                | -2.120076 | 0.646606  |
| 19               | 1                | 0              | 2.159036                | -1.657810 | -1.445306 |
| 20               | 6                | 0              | 1.441929                | -2.010108 | 1.846460  |
| 21               | 7                | 0              | 0.796612                | -1.865754 | 2.825138  |
| 22               | 6                | 0              | 3.243847                | -2.968065 | 0.558942  |
| 23               | 7                | 0              | 4.175764                | -3.684280 | 0.463433  |
| 24               | 7                | 0              | -2.473557               | -0.374727 | 0.573506  |
| 25               | 6                | 0              | -3.907730               | -0.049266 | 0.871329  |
| 26               | 1                | 0              | -4.127660               | 0.905000  | 0.385152  |
| 27               | 1                | 0              | -4.550247               | -0.816188 | 0.440832  |
| 28               | 6                | 0              | -3.943836               | 0.012820  | 2.407192  |
| 29               | 6                | 0              | -1.717024               | -0.241379 | 1.612597  |
| 30               | 1                | 0              | -0.651645               | -0.438523 | 1.574701  |
| 31               | 6                | 0              | -2.463285               | 0.188768  | 2.819888  |
| 32               | 1                | 0              | -2.161313               | -0.393239 | 3.694336  |
| 33               | 1                | 0              | -2.193353               | 1.233576  | 3.029008  |
| 34               | 1                | 0              | -4.336091               | -0.922114 | 2.812058  |
| 35               | 1                | 0              | -4.574137               | 0.829159  | 2.759192  |
| 36               | 6                | 0              | -0.983501               | 0.029019  | -1.372270 |
| 37               | 6                | 0              | -0.646921               | -0.330921 | -2.688692 |
| 38               | 6                | 0              | -2.035127               | -0.687751 | -0.765514 |
| 39               | 6                | 0              | -1.300730               | -1.361544 | -3.357031 |
| 40               | 1                | 0              | 0.143708                | 0.221049  | -3.185986 |
| 41               | 6                | 0              | -2.699010               | -1.725354 | -1.429406 |
| 42               | 6                | 0              | -2.327077               | -2.067482 | -2.724741 |
| 43               | 1                | 0              | -1.014002               | -1.610006 | -4.373679 |
| 44               | 1                | 0              | -3.486428               | -2.274662 | -0.925621 |
| 45               | 1                | 0              | -2.837267               | -2.877047 | -3.235016 |
| 46               | 1                | 0              | 0.619550                | -1.408597 | -0.682826 |

1705aad\_model3\_NaphtPh\_pyrrolidine\_CN2\_ZW\_int\_b3lyp631dp\_PCMdms0.log

Standard orientation:

| Center<br>Number | Atomic<br>Number | Atomic<br>Type | Coordinates (Angstroms) |           |           |
|------------------|------------------|----------------|-------------------------|-----------|-----------|
|                  |                  |                | X                       | Y         | Z         |
| 1                | 6                | 0              | -3.167253               | 2.509230  | 0.658264  |
| 2                | 6                | 0              | -3.795742               | 1.307115  | 0.444125  |
| 3                | 6                | 0              | -3.105336               | 0.229757  | -0.168673 |
| 4                | 6                | 0              | -1.713974               | 0.365584  | -0.547703 |
| 5                | 6                | 0              | -1.109564               | 1.663294  | -0.379445 |
| 6                | 6                | 0              | -1.839030               | 2.675687  | 0.224531  |
| 7                | 1                | 0              | -4.858877               | -1.030216 | -0.129255 |
| 8                | 1                | 0              | -3.692715               | 3.335982  | 1.126372  |
| 9                | 1                | 0              | -4.834046               | 1.161581  | 0.728337  |
| 10               | 6                | 0              | -3.814068               | -0.976487 | -0.422020 |
| 11               | 6                | 0              | -1.078254               | -0.815305 | -1.091205 |
| 12               | 1                | 0              | -1.360435               | 3.643390  | 0.347816  |
| 13               | 6                | 0              | -1.832582               | -1.948367 | -1.356417 |
| 14               | 6                | 0              | -3.203488               | -2.038234 | -1.037863 |
| 15               | 1                | 0              | -1.335349               | -2.811437 | -1.788947 |
| 16               | 1                | 0              | -3.750469               | -2.950124 | -1.254751 |
| 17               | 6                | 0              | 0.264464                | 2.064978  | -0.902315 |

|    |   |   |           |           |           |
|----|---|---|-----------|-----------|-----------|
| 18 | 6 | 0 | 1.266865  | 2.448349  | 0.186610  |
| 19 | 1 | 0 | 0.121572  | 2.936047  | -1.553773 |
| 20 | 6 | 0 | 1.217139  | 1.864488  | 1.436666  |
| 21 | 7 | 0 | 1.142447  | 1.331631  | 2.492155  |
| 22 | 6 | 0 | 2.333277  | 3.302766  | -0.122102 |
| 23 | 7 | 0 | 3.211656  | 4.030880  | -0.408232 |
| 24 | 7 | 0 | 1.061759  | -1.468822 | 0.961696  |
| 25 | 6 | 0 | -0.097521 | -2.277888 | 1.462163  |
| 26 | 1 | 0 | -0.982032 | -1.639270 | 1.480122  |
| 27 | 1 | 0 | -0.271872 | -3.108455 | 0.779843  |
| 28 | 6 | 0 | 0.360775  | -2.699262 | 2.865740  |
| 29 | 6 | 0 | 1.811972  | -1.053815 | 1.948213  |
| 30 | 1 | 0 | 2.709927  | -0.486146 | 1.758400  |
| 31 | 6 | 0 | 1.398102  | -1.624793 | 3.263072  |
| 32 | 1 | 0 | 2.263836  | -2.024867 | 3.799149  |
| 33 | 1 | 0 | 0.976016  | -0.823065 | 3.874679  |
| 34 | 1 | 0 | 0.834327  | -3.683168 | 2.824171  |
| 35 | 1 | 0 | -0.477421 | -2.752341 | 3.561425  |
| 36 | 6 | 0 | 0.385253  | -0.968110 | -1.396673 |
| 37 | 6 | 0 | 0.794559  | -0.924536 | -2.741965 |
| 38 | 6 | 0 | 1.368991  | -1.281116 | -0.433224 |
| 39 | 6 | 0 | 2.118125  | -1.123945 | -3.121034 |
| 40 | 1 | 0 | 0.043684  | -0.706444 | -3.494494 |
| 41 | 6 | 0 | 2.702995  | -1.494970 | -0.815511 |
| 42 | 6 | 0 | 3.081496  | -1.400725 | -2.148729 |
| 43 | 1 | 0 | 2.394233  | -1.072628 | -4.169165 |
| 44 | 1 | 0 | 3.434132  | -1.777702 | -0.066018 |
| 45 | 1 | 0 | 4.115656  | -1.573914 | -2.426758 |
| 46 | 1 | 0 | 0.675596  | 1.284788  | -1.543505 |

-----  
1705aae\_model3\_NaphtPh\_pyrrolidine\_CN2\_ZW\_int\_b3lyp631dp\_PCMdmsol.log

Standard orientation:

| Center<br>Number | Atomic<br>Number | Atomic<br>Type | Coordinates (Angstroms) |           |           |
|------------------|------------------|----------------|-------------------------|-----------|-----------|
|                  |                  |                | X                       | Y         | Z         |
| 1                | 6                | 0              | -0.526887               | -3.537403 | -1.444876 |
| 2                | 6                | 0              | -1.038937               | -3.615437 | -0.175238 |
| 3                | 6                | 0              | -0.882790               | -2.533533 | 0.732945  |
| 4                | 6                | 0              | -0.207413               | -1.324651 | 0.322413  |
| 5                | 6                | 0              | 0.413028                | -1.313005 | -0.981923 |
| 6                | 6                | 0              | 0.214058                | -2.396955 | -1.821872 |
| 7                | 1                | 0              | -1.880009               | -3.595983 | 2.326988  |
| 8                | 1                | 0              | -0.651125               | -4.356880 | -2.146087 |
| 9                | 1                | 0              | -1.567342               | -4.502823 | 0.161389  |
| 10               | 6                | 0              | -1.389944               | -2.665759 | 2.053670  |
| 11               | 6                | 0              | -0.198282               | -0.237177 | 1.270380  |
| 12               | 1                | 0              | 0.681821                | -2.380995 | -2.802363 |
| 13               | 6                | 0              | -0.674989               | -0.432656 | 2.559354  |
| 14               | 6                | 0              | -1.254289               | -1.651021 | 2.968263  |
| 15               | 1                | 0              | -0.646615               | 0.399903  | 3.255638  |
| 16               | 1                | 0              | -1.623082               | -1.760774 | 3.982979  |
| 17               | 6                | 0              | 1.404478                | -0.265058 | -1.469367 |
| 18               | 6                | 0              | 2.778466                | -0.375801 | -0.798526 |
| 19               | 1                | 0              | 1.040310                | 0.752388  | -1.315834 |
| 20               | 6                | 0              | 3.274037                | -1.593947 | -0.329363 |
| 21               | 7                | 0              | 3.690390                | -2.618233 | 0.080715  |
| 22               | 6                | 0              | 3.640503                | 0.722136  | -0.822265 |
| 23               | 7                | 0              | 4.348387                | 1.664990  | -0.850916 |
| 24               | 7                | 0              | -1.788091               | 1.508144  | -0.498653 |
| 25               | 6                | 0              | -3.009267               | 1.102064  | 0.275181  |
| 26               | 1                | 0              | -2.797538               | 0.145953  | 0.754667  |
| 27               | 1                | 0              | -3.189309               | 1.853563  | 1.044332  |
| 28               | 6                | 0              | -4.100790               | 1.022603  | -0.808377 |
| 29               | 6                | 0              | -1.966823               | 1.428494  | -1.773730 |
| 30               | 1                | 0              | -1.162194               | 1.674365  | -2.458731 |
| 31               | 6                | 0              | -3.324077               | 0.961173  | -2.146620 |
| 32               | 1                | 0              | -3.748006               | 1.578960  | -2.943284 |
| 33               | 1                | 0              | -3.233929               | -0.055128 | -2.553608 |
| 34               | 1                | 0              | -4.724747               | 1.917771  | -0.780704 |
| 35               | 1                | 0              | -4.742750               | 0.153918  | -0.663936 |
| 36               | 6                | 0              | 0.194668                | 1.172014  | 0.956285  |
| 37               | 6                | 0              | 1.318052                | 1.750314  | 1.561083  |
| 38               | 6                | 0              | -0.581978               | 2.006003  | 0.130059  |

|    |   |   |           |           |           |
|----|---|---|-----------|-----------|-----------|
| 39 | 6 | 0 | 1.662685  | 3.084009  | 1.339925  |
| 40 | 1 | 0 | 1.935328  | 1.128588  | 2.199633  |
| 41 | 6 | 0 | -0.248806 | 3.342190  | -0.104602 |
| 42 | 6 | 0 | 0.883624  | 3.881559  | 0.502013  |
| 43 | 1 | 0 | 2.543469  | 3.496834  | 1.820247  |
| 44 | 1 | 0 | -0.886633 | 3.953190  | -0.734317 |
| 45 | 1 | 0 | 1.144804  | 4.919379  | 0.325680  |
| 46 | 1 | 0 | 1.482799  | -0.387472 | -2.559573 |

1709aab\_model3\_NaphtPh\_pyrrolidine\_CN2\_PRODUCT\_b3lyp631dp\_PCMDmso.log

Standard orientation:

| Center<br>Number | Atomic<br>Number | Atomic<br>Type | Coordinates (Angstroms) |           |           |
|------------------|------------------|----------------|-------------------------|-----------|-----------|
|                  |                  |                | X                       | Y         | Z         |
| 1                | 6                | 0              | 3.806087                | -1.512689 | -1.153364 |
| 2                | 6                | 0              | 4.170165                | -0.646396 | -0.152968 |
| 3                | 6                | 0              | 3.233170                | 0.271451  | 0.392456  |
| 4                | 6                | 0              | 1.886565                | 0.329198  | -0.121725 |
| 5                | 6                | 0              | 1.508284                | -0.664400 | -1.094268 |
| 6                | 6                | 0              | 2.467424                | -1.530097 | -1.595599 |
| 7                | 1                | 0              | 4.652361                | 1.045491  | 1.826958  |
| 8                | 1                | 0              | 4.524996                | -2.204927 | -1.579709 |
| 9                | 1                | 0              | 5.182138                | -0.647836 | 0.242074  |
| 10               | 6                | 0              | 3.635977                | 1.127734  | 1.452561  |
| 11               | 6                | 0              | 1.020965                | 1.364823  | 0.391011  |
| 12               | 1                | 0              | 2.170901                | -2.265450 | -2.337945 |
| 13               | 6                | 0              | 1.466330                | 2.159176  | 1.436984  |
| 14               | 6                | 0              | 2.757606                | 2.032088  | 1.992978  |
| 15               | 1                | 0              | 0.804984                | 2.933427  | 1.813309  |
| 16               | 1                | 0              | 3.056710                | 2.676998  | 2.813296  |
| 17               | 6                | 0              | 0.080834                | -0.912400 | -1.533831 |
| 18               | 6                | 0              | -0.767077               | -1.729832 | -0.468355 |
| 19               | 1                | 0              | 0.089974                | -1.505421 | -2.451195 |
| 20               | 6                | 0              | -0.098519               | -3.019374 | -0.209817 |
| 21               | 7                | 0              | 0.436075                | -4.025421 | 0.012630  |
| 22               | 6                | 0              | -2.080485               | -2.019065 | -1.075376 |
| 23               | 7                | 0              | -3.105535               | -2.221727 | -1.580722 |
| 24               | 7                | 0              | -1.832069               | 0.205762  | 0.789559  |
| 25               | 6                | 0              | -3.187152               | -0.085081 | 1.298892  |
| 26               | 1                | 0              | -3.481733               | 0.698775  | 2.007003  |
| 27               | 1                | 0              | -3.930567               | -0.099642 | 0.494333  |
| 28               | 6                | 0              | -3.085961               | -1.472717 | 1.957735  |
| 29               | 6                | 0              | -0.945870               | -0.935030 | 0.916418  |
| 30               | 1                | 0              | 0.063611                | -0.635944 | 1.189664  |
| 31               | 6                | 0              | -1.577211               | -1.748714 | 2.059262  |
| 32               | 1                | 0              | -1.328101               | -2.810835 | 2.018575  |
| 33               | 1                | 0              | -1.178607               | -1.355756 | 2.999085  |
| 34               | 1                | 0              | -3.575770               | -2.223739 | 1.333624  |
| 35               | 1                | 0              | -3.571174               | -1.493435 | 2.935804  |
| 36               | 6                | 0              | -0.264719               | 1.833979  | -0.245741 |
| 37               | 6                | 0              | -0.122813               | 2.958849  | -1.073617 |
| 38               | 6                | 0              | -1.577037               | 1.356488  | 0.035250  |
| 39               | 6                | 0              | -1.210785               | 3.654062  | -1.598352 |
| 40               | 1                | 0              | 0.884694                | 3.305078  | -1.284957 |
| 41               | 6                | 0              | -2.670449               | 2.098648  | -0.466024 |
| 42               | 6                | 0              | -2.492508               | 3.224790  | -1.264142 |
| 43               | 1                | 0              | -1.055248               | 4.522219  | -2.230451 |
| 44               | 1                | 0              | -3.680097               | 1.781733  | -0.241617 |
| 45               | 1                | 0              | -3.366494               | 3.755126  | -1.631196 |
| 46               | 1                | 0              | -0.468808               | 0.000885  | -1.749134 |

1709aac\_model3\_NaphtPh\_pyrrolidine\_CN2\_PRODUCT\_b3lyp631dp\_PCMDmso.log

Standard orientation:

| Center<br>Number | Atomic<br>Number | Atomic<br>Type | Coordinates (Angstroms) |           |           |
|------------------|------------------|----------------|-------------------------|-----------|-----------|
|                  |                  |                | X                       | Y         | Z         |
| 1                | 6                | 0              | 3.806129                | -1.512733 | -1.153260 |
| 2                | 6                | 0              | 4.170198                | -0.646379 | -0.152914 |
| 3                | 6                | 0              | 3.233200                | 0.271496  | 0.392457  |
| 4                | 6                | 0              | 1.886593                | 0.329205  | -0.121731 |

|    |   |   |           |           |           |
|----|---|---|-----------|-----------|-----------|
| 5  | 6 | 0 | 1.508330  | -0.664441 | -1.094238 |
| 6  | 6 | 0 | 2.467472  | -1.530162 | -1.595515 |
| 7  | 1 | 0 | 4.652379  | 1.045644  | 1.826913  |
| 8  | 1 | 0 | 4.525041  | -2.205004 | -1.579544 |
| 9  | 1 | 0 | 5.182173  | -0.647788 | 0.242122  |
| 10 | 6 | 0 | 3.635992  | 1.127839  | 1.452514  |
| 11 | 6 | 0 | 1.020974  | 1.364828  | 0.390955  |
| 12 | 1 | 0 | 2.170958  | -2.265544 | -2.337836 |
| 13 | 6 | 0 | 1.466320  | 2.159230  | 1.436902  |
| 14 | 6 | 0 | 2.757599  | 2.032200  | 1.992892  |
| 15 | 1 | 0 | 0.804958  | 2.933473  | 1.813213  |
| 16 | 1 | 0 | 3.056696  | 2.677161  | 2.813171  |
| 17 | 6 | 0 | 0.080888  | -0.912417 | -1.533841 |
| 18 | 6 | 0 | -0.767100 | -1.729820 | -0.468375 |
| 19 | 1 | 0 | 0.090035  | -1.505458 | -2.451191 |
| 20 | 6 | 0 | -0.098644 | -3.019420 | -0.209914 |
| 21 | 7 | 0 | 0.435831  | -4.025541 | 0.012478  |
| 22 | 6 | 0 | -2.080547 | -2.018861 | -1.075383 |
| 23 | 7 | 0 | -3.105592 | -2.221327 | -1.580813 |
| 24 | 7 | 0 | -1.831999 | 0.205750  | 0.789665  |
| 25 | 6 | 0 | -3.187084 | -0.085152 | 1.298970  |
| 26 | 1 | 0 | -3.481682 | 0.698666  | 2.007114  |
| 27 | 1 | 0 | -3.930470 | -0.099675 | 0.494384  |
| 28 | 6 | 0 | -3.085859 | -1.472818 | 1.957751  |
| 29 | 6 | 0 | -0.945814 | -0.935056 | 0.916446  |
| 30 | 1 | 0 | 0.063685  | -0.635982 | 1.189628  |
| 31 | 6 | 0 | -1.577101 | -1.748762 | 2.059284  |
| 32 | 1 | 0 | -1.327952 | -2.810874 | 2.018625  |
| 33 | 1 | 0 | -1.178514 | -1.355772 | 2.999103  |
| 34 | 1 | 0 | -3.575635 | -2.223835 | 1.333598  |
| 35 | 1 | 0 | -3.571084 | -1.493615 | 2.935813  |
| 36 | 6 | 0 | -0.264724 | 1.833933  | -0.245807 |
| 37 | 6 | 0 | -0.122873 | 2.958753  | -1.073754 |
| 38 | 6 | 0 | -1.577022 | 1.356456  | 0.035316  |
| 39 | 6 | 0 | -1.210884 | 3.653956  | -1.598423 |
| 40 | 1 | 0 | 0.884621  | 3.304962  | -1.285195 |
| 41 | 6 | 0 | -2.670472 | 2.098649  | -0.465837 |
| 42 | 6 | 0 | -2.492583 | 3.224744  | -1.264032 |
| 43 | 1 | 0 | -1.055402 | 4.522068  | -2.230598 |
| 44 | 1 | 0 | -3.680105 | 1.781814  | -0.241245 |
| 45 | 1 | 0 | -3.366592 | 3.755104  | -1.630997 |
| 46 | 1 | 0 | -0.468719 | 0.000884  | -1.749165 |

-----  
1709aad\_model3\_NaphtPh\_pyrrolidine\_CN2\_PRODUCT\_b3lyp631dp\_PCmDmso.log

Standard orientation:

| Center<br>Number | Atomic<br>Number | Atomic<br>Type | Coordinates (Angstroms) |           |           |
|------------------|------------------|----------------|-------------------------|-----------|-----------|
|                  |                  |                | X                       | Y         | Z         |
| 1                | 6                | 0              | 3.671884                | -1.843841 | -0.938174 |
| 2                | 6                | 0              | 4.084017                | -0.905959 | -0.026565 |
| 3                | 6                | 0              | 3.216150                | 0.140739  | 0.385501  |
| 4                | 6                | 0              | 1.878536                | 0.245909  | -0.153986 |
| 5                | 6                | 0              | 1.444712                | -0.817278 | -1.028683 |
| 6                | 6                | 0              | 2.346297                | -1.797667 | -1.413649 |
| 7                | 1                | 0              | 4.699683                | 0.959525  | 1.724501  |
| 8                | 1                | 0              | 4.339752                | -2.632169 | -1.270440 |
| 9                | 1                | 0              | 5.085767                | -0.939704 | 0.392350  |
| 10               | 6                | 0              | 3.695662                | 1.086972  | 1.329861  |
| 11               | 6                | 0              | 1.115195                | 1.413208  | 0.216237  |
| 12               | 1                | 0              | 2.006734                | -2.581965 | -2.084606 |
| 13               | 6                | 0              | 1.639283                | 2.304487  | 1.142188  |
| 14               | 6                | 0              | 2.910887                | 2.138774  | 1.727425  |
| 15               | 1                | 0              | 1.050574                | 3.178027  | 1.404918  |
| 16               | 1                | 0              | 3.269620                | 2.860273  | 2.454789  |
| 17               | 6                | 0              | 0.016471                | -1.041051 | -1.485764 |
| 18               | 6                | 0              | -0.891207               | -1.832058 | -0.427973 |
| 19               | 1                | 0              | 0.045035                | -1.642602 | -2.395158 |
| 20               | 6                | 0              | -0.095225               | -2.339874 | 0.708151  |
| 21               | 7                | 0              | 0.481208                | -2.753925 | 1.626169  |
| 22               | 6                | 0              | -1.489484               | -3.003855 | -1.100873 |
| 23               | 7                | 0              | -1.982838               | -3.898888 | -1.651245 |
| 24               | 7                | 0              | -1.546226               | 0.267533  | 0.779404  |
| 25               | 6                | 0              | -2.241024               | 0.466173  | 2.080759  |

|    |   |   |           |           |           |
|----|---|---|-----------|-----------|-----------|
| 26 | 1 | 0 | -1.569379 | 0.187006  | 2.902264  |
| 27 | 1 | 0 | -2.504184 | 1.518993  | 2.210415  |
| 28 | 6 | 0 | -3.462809 | -0.460961 | 2.036101  |
| 29 | 6 | 0 | -2.071767 | -0.936899 | 0.126914  |
| 30 | 1 | 0 | -2.667791 | -0.682440 | -0.760373 |
| 31 | 6 | 0 | -2.962706 | -1.630509 | 1.177434  |
| 32 | 1 | 0 | -3.765100 | -2.204747 | 0.709498  |
| 33 | 1 | 0 | -2.371051 | -2.316984 | 1.792137  |
| 34 | 1 | 0 | -4.303992 | 0.039987  | 1.544347  |
| 35 | 1 | 0 | -3.793553 | -0.776550 | 3.029021  |
| 36 | 6 | 0 | -0.156815 | 1.891137  | -0.428138 |
| 37 | 6 | 0 | -0.065031 | 2.967603  | -1.327892 |
| 38 | 6 | 0 | -1.432725 | 1.413008  | -0.081371 |
| 39 | 6 | 0 | -1.203672 | 3.563926  | -1.867476 |
| 40 | 1 | 0 | 0.918338  | 3.340377  | -1.597789 |
| 41 | 6 | 0 | -2.575177 | 2.028637  | -0.615467 |
| 42 | 6 | 0 | -2.467611 | 3.099537  | -1.500674 |
| 43 | 1 | 0 | -1.103075 | 4.391950  | -2.562491 |
| 44 | 1 | 0 | -3.556887 | 1.656671  | -0.335933 |
| 45 | 1 | 0 | -3.363119 | 3.562458  | -1.903995 |
| 46 | 1 | 0 | -0.505431 | -0.122091 | -1.737072 |

1801aaa\_model4\_PhOCH2Ph\_pyrrolidine\_CN2\_b3lyp631dp\_PCMdmsol.log

Standard orientation:

| Center<br>Number | Atomic<br>Number | Atomic<br>Type | Coordinates (Angstroms) |           |           |
|------------------|------------------|----------------|-------------------------|-----------|-----------|
|                  |                  |                | X                       | Y         | Z         |
| 1                | 6                | 0              | -3.774368               | -2.672805 | -0.497441 |
| 2                | 6                | 0              | -3.740999               | -1.315697 | -0.219790 |
| 3                | 6                | 0              | -2.544348               | -0.570597 | -0.324003 |
| 4                | 6                | 0              | -1.354169               | -1.258448 | -0.726179 |
| 5                | 6                | 0              | -1.397647               | -2.630527 | -1.005509 |
| 6                | 6                | 0              | -2.599229               | -3.324506 | -0.889832 |
| 7                | 1                | 0              | -4.705208               | -3.222700 | -0.414376 |
| 8                | 1                | 0              | -4.655288               | -0.816487 | 0.073257  |
| 9                | 1                | 0              | -0.503760               | -3.159702 | -1.307959 |
| 10               | 1                | 0              | -2.616119               | -4.387669 | -1.108984 |
| 11               | 6                | 0              | -2.440319               | 0.843974  | -0.073620 |
| 12               | 6                | 0              | -3.355816               | 1.753513  | 0.396877  |
| 13               | 1                | 0              | -1.465118               | 1.265661  | -0.293031 |
| 14               | 6                | 0              | -4.700990               | 1.475199  | 0.792693  |
| 15               | 7                | 0              | -5.801009               | 1.290558  | 1.128313  |
| 16               | 6                | 0              | -2.965934               | 3.125131  | 0.532358  |
| 17               | 7                | 0              | -2.657308               | 4.242299  | 0.645743  |
| 18               | 6                | 0              | 2.084098                | -0.078335 | -1.358864 |
| 19               | 6                | 0              | 2.189983                | 0.608554  | -2.576552 |
| 20               | 6                | 0              | 3.030849                | 0.182732  | -0.321677 |
| 21               | 6                | 0              | 3.209788                | 1.517044  | -2.841478 |
| 22               | 1                | 0              | 1.453291                | 0.392685  | -3.346817 |
| 23               | 6                | 0              | 4.088845                | 1.076622  | -0.628010 |
| 24               | 6                | 0              | 4.172648                | 1.727506  | -1.853338 |
| 25               | 1                | 0              | 3.266523                | 2.024507  | -3.798737 |
| 26               | 1                | 0              | 4.852200                | 1.275613  | 0.112467  |
| 27               | 1                | 0              | 4.999651                | 2.409799  | -2.030393 |
| 28               | 7                | 0              | 2.991342                | -0.422710 | 0.927858  |
| 29               | 6                | 0              | 4.084863                | -0.213105 | 1.891764  |
| 30               | 1                | 0              | 4.250764                | 0.858178  | 2.085674  |
| 31               | 1                | 0              | 5.023862                | -0.630422 | 1.511812  |
| 32               | 6                | 0              | 3.589737                | -0.897403 | 3.166529  |
| 33               | 1                | 0              | 4.088772                | -0.513567 | 4.059755  |
| 34               | 1                | 0              | 3.765982                | -1.977622 | 3.114022  |
| 35               | 6                | 0              | 1.742862                | -0.778798 | 1.642759  |
| 36               | 6                | 0              | 1.006471                | -1.123913 | -1.274903 |
| 37               | 6                | 0              | 2.085982                | -0.597461 | 3.127510  |
| 38               | 1                | 0              | 1.491255                | -1.252073 | 3.769795  |
| 39               | 1                | 0              | 1.902725                | 0.437922  | 3.436016  |
| 40               | 1                | 0              | 1.463054                | -1.823180 | 1.455185  |
| 41               | 1                | 0              | 0.913583                | -0.146460 | 1.316386  |
| 42               | 1                | 0              | 0.817810                | -1.536615 | -2.270644 |
| 43               | 1                | 0              | 1.278738                | -1.946134 | -0.610771 |
| 44               | 8                | 0              | -0.228467               | -0.514355 | -0.802728 |



Standard orientation:

| Center Number | Atomic Number | Atomic Type | Coordinates (Angstroms) |           |           |
|---------------|---------------|-------------|-------------------------|-----------|-----------|
|               |               |             | X                       | Y         | Z         |
| 1             | 6             | 0           | -4.288961               | -1.979750 | -0.589628 |
| 2             | 6             | 0           | -3.700680               | -0.720594 | -0.504379 |
| 3             | 6             | 0           | -2.302546               | -0.560398 | -0.480836 |
| 4             | 6             | 0           | -1.505952               | -1.718260 | -0.533484 |
| 5             | 6             | 0           | -2.098740               | -2.982782 | -0.617854 |
| 6             | 6             | 0           | -3.483409               | -3.118510 | -0.650594 |
| 7             | 1             | 0           | -5.370487               | -2.067163 | -0.607792 |
| 8             | 1             | 0           | -4.328599               | 0.163974  | -0.458419 |
| 9             | 1             | 0           | -1.446020               | -3.848325 | -0.663735 |
| 10            | 1             | 0           | -3.929771               | -4.105465 | -0.720539 |
| 11            | 6             | 0           | -1.825851               | 0.867813  | -0.421702 |
| 12            | 6             | 0           | -1.913165               | 1.601880  | 0.764711  |
| 13            | 1             | 0           | -0.315449               | 0.811125  | -0.865134 |
| 14            | 6             | 0           | -1.798017               | 1.008235  | 2.052188  |
| 15            | 7             | 0           | -1.691322               | 0.554742  | 3.121304  |
| 16            | 6             | 0           | -2.049564               | 3.018675  | 0.742570  |
| 17            | 7             | 0           | -2.174791               | 4.178880  | 0.725477  |
| 18            | 6             | 0           | 2.005152                | -1.321284 | 0.474598  |
| 19            | 6             | 0           | 2.829739                | -2.400991 | 0.813534  |
| 20            | 6             | 0           | 2.588949                | -0.147071 | -0.051726 |
| 21            | 6             | 0           | 4.214505                | -2.332716 | 0.677580  |
| 22            | 1             | 0           | 2.369237                | -3.301395 | 1.211095  |
| 23            | 6             | 0           | 3.987044                | -0.083500 | -0.182250 |
| 24            | 6             | 0           | 4.789943                | -1.161949 | 0.180431  |
| 25            | 1             | 0           | 4.834706                | -3.177439 | 0.959442  |
| 26            | 1             | 0           | 4.448918                | 0.809624  | -0.587610 |
| 27            | 1             | 0           | 5.866864                | -1.086863 | 0.063104  |
| 28            | 7             | 0           | 1.806206                | 0.971567  | -0.422084 |
| 29            | 6             | 0           | 2.194662                | 2.343368  | -0.033345 |
| 30            | 1             | 0           | 3.236390                | 2.545434  | -0.305449 |
| 31            | 1             | 0           | 2.105414                | 2.468670  | 1.050742  |
| 32            | 6             | 0           | 1.232759                | 3.246427  | -0.824398 |
| 33            | 1             | 0           | 1.744467                | 4.143069  | -1.180815 |
| 34            | 1             | 0           | 0.394494                | 3.563578  | -0.198788 |
| 35            | 6             | 0           | 0.758732                | 0.957355  | -1.371406 |
| 36            | 6             | 0           | 0.525084                | -1.426904 | 0.697555  |
| 37            | 6             | 0           | 0.747824                | 2.354386  | -1.983466 |
| 38            | 1             | 0           | -0.229626               | 2.639778  | -2.380534 |
| 39            | 1             | 0           | 1.462693                | 2.384325  | -2.813974 |
| 40            | 1             | 0           | 0.784853                | 0.104659  | -2.050631 |
| 41            | 1             | 0           | 0.297998                | -2.257013 | 1.376068  |
| 42            | 1             | 0           | 0.140368                | -0.505846 | 1.145217  |
| 43            | 8             | 0           | -0.127767               | -1.666238 | -0.572826 |
| 44            | 1             | 0           | -2.070007               | 1.448262  | -1.311095 |

1805aaa\_model4\_PhOCH2Ph\_pyrrolidine\_CN2\_ZW\_int\_b3lyp631dp\_PCMdmso.log

Standard orientation:

| Center Number | Atomic Number | Atomic Type | Coordinates (Angstroms) |           |           |
|---------------|---------------|-------------|-------------------------|-----------|-----------|
|               |               |             | X                       | Y         | Z         |
| 1             | 6             | 0           | -3.766668               | -2.108303 | 1.565723  |
| 2             | 6             | 0           | -3.655627               | -1.338623 | 0.406604  |
| 3             | 6             | 0           | -2.416308               | -0.993249 | -0.141352 |
| 4             | 6             | 0           | -1.258123               | -1.449818 | 0.521244  |
| 5             | 6             | 0           | -1.353667               | -2.217284 | 1.689688  |
| 6             | 6             | 0           | -2.608831               | -2.544799 | 2.207171  |
| 7             | 1             | 0           | -4.745216               | -2.362284 | 1.961623  |
| 8             | 1             | 0           | -4.553689               | -0.986315 | -0.094335 |
| 9             | 1             | 0           | -0.464437               | -2.561220 | 2.203736  |
| 10            | 1             | 0           | -2.670926               | -3.141634 | 3.112334  |
| 11            | 6             | 0           | -2.346230               | -0.146742 | -1.408514 |
| 12            | 6             | 0           | -2.956641               | 1.249689  | -1.285112 |
| 13            | 1             | 0           | -1.305406               | -0.076262 | -1.733392 |
| 14            | 6             | 0           | -2.268621               | 2.257012  | -0.609459 |
| 15            | 7             | 0           | -1.659981               | 3.094008  | -0.041718 |
| 16            | 6             | 0           | -4.242500               | 1.510794  | -1.759464 |

|    |   |   |           |           |           |
|----|---|---|-----------|-----------|-----------|
| 17 | 7 | 0 | -5.326925 | 1.713259  | -2.177933 |
| 18 | 6 | 0 | 2.303157  | -1.272085 | -0.384787 |
| 19 | 6 | 0 | 2.774149  | -2.173893 | -1.345824 |
| 20 | 6 | 0 | 2.955106  | -0.031865 | -0.297554 |
| 21 | 6 | 0 | 3.845075  | -1.855358 | -2.181033 |
| 22 | 1 | 0 | 2.293214  | -3.143443 | -1.430683 |
| 23 | 6 | 0 | 4.025959  | 0.306070  | -1.124036 |
| 24 | 6 | 0 | 4.474064  | -0.615705 | -2.069511 |
| 25 | 1 | 0 | 4.188810  | -2.576643 | -2.914998 |
| 26 | 1 | 0 | 4.497913  | 1.277544  | -1.024660 |
| 27 | 1 | 0 | 5.310919  | -0.361937 | -2.711184 |
| 28 | 7 | 0 | 2.503729  | 0.967448  | 0.650206  |
| 29 | 6 | 0 | 1.381835  | 1.909812  | 0.328903  |
| 30 | 1 | 0 | 0.462457  | 1.324532  | 0.290098  |
| 31 | 1 | 0 | 1.568054  | 2.334800  | -0.657851 |
| 32 | 6 | 0 | 1.435687  | 2.926216  | 1.483524  |
| 33 | 1 | 0 | 0.432961  | 3.148659  | 1.844732  |
| 34 | 1 | 0 | 1.891849  | 3.858417  | 1.145166  |
| 35 | 6 | 0 | 2.997658  | 1.159361  | 1.824597  |
| 36 | 6 | 0 | 1.145783  | -1.658119 | 0.503829  |
| 37 | 6 | 0 | 2.329890  | 2.261104  | 2.560659  |
| 38 | 1 | 0 | 3.067193  | 2.930027  | 3.013875  |
| 39 | 1 | 0 | 1.762055  | 1.818600  | 3.390506  |
| 40 | 1 | 0 | 3.803357  | 0.531685  | 2.192294  |
| 41 | 1 | 0 | 1.065736  | -2.750004 | 0.537093  |
| 42 | 1 | 0 | 1.291744  | -1.302531 | 1.530640  |
| 43 | 8 | 0 | -0.050754 | -1.094223 | -0.046718 |
| 44 | 1 | 0 | -2.879210 | -0.676505 | -2.206905 |

1809aaa\_model4\_PhOCH2Ph\_pyrrolidine\_CN2\_PRODUCT\_b3lyp631dp\_PCmDmsO.log

Standard orientation:

| Center<br>Number | Atomic<br>Number | Atomic<br>Type | Coordinates (Angstroms) |           |           |
|------------------|------------------|----------------|-------------------------|-----------|-----------|
|                  |                  |                | X                       | Y         | Z         |
| 1                | 6                | 0              | -4.538073               | 0.569175  | -0.147932 |
| 2                | 6                | 0              | -3.443083               | -0.084901 | -0.711292 |
| 3                | 6                | 0              | -2.149775               | 0.448976  | -0.621683 |
| 4                | 6                | 0              | -1.982321               | 1.681079  | 0.041139  |
| 5                | 6                | 0              | -3.078426               | 2.341169  | 0.604221  |
| 6                | 6                | 0              | -4.353924               | 1.785692  | 0.513403  |
| 7                | 1                | 0              | -5.529466               | 0.135316  | -0.231655 |
| 8                | 1                | 0              | -3.593002               | -1.024544 | -1.236804 |
| 9                | 1                | 0              | -2.913897               | 3.294237  | 1.096513  |
| 10               | 1                | 0              | -5.201150               | 2.304979  | 0.950970  |
| 11               | 6                | 0              | -0.960334               | -0.254407 | -1.231374 |
| 12               | 6                | 0              | -0.503567               | -1.598121 | -0.513752 |
| 13               | 1                | 0              | -0.108358               | 0.422036  | -1.227934 |
| 14               | 6                | 0              | -1.021145               | -2.745425 | -1.284537 |
| 15               | 7                | 0              | -1.406903               | -3.636596 | -1.921023 |
| 16               | 6                | 0              | -1.055111               | -1.701455 | 0.851167  |
| 17               | 7                | 0              | -1.484134               | -1.800976 | 1.924884  |
| 18               | 6                | 0              | 1.566627                | 1.792216  | 0.336473  |
| 19               | 6                | 0              | 2.190927                | 2.973261  | -0.092070 |
| 20               | 6                | 0              | 2.163915                | 0.554209  | 0.028057  |
| 21               | 6                | 0              | 3.375428                | 2.941335  | -0.823256 |
| 22               | 1                | 0              | 1.729907                | 3.927480  | 0.147906  |
| 23               | 6                | 0              | 3.359922                | 0.530623  | -0.707579 |
| 24               | 6                | 0              | 3.959039                | 1.711547  | -1.139341 |
| 25               | 1                | 0              | 3.841140                | 3.867515  | -1.145716 |
| 26               | 1                | 0              | 3.821894                | -0.425375 | -0.937756 |
| 27               | 1                | 0              | 4.881481                | 1.673157  | -1.710889 |
| 28               | 7                | 0              | 1.587489                | -0.671175 | 0.514120  |
| 29               | 6                | 0              | 2.366125                | -1.331133 | 1.592951  |
| 30               | 1                | 0              | 2.159790                | -0.851860 | 2.555562  |
| 31               | 1                | 0              | 3.444997                | -1.241198 | 1.400362  |
| 32               | 6                | 0              | 1.932840                | -2.797168 | 1.546333  |
| 33               | 1                | 0              | 1.030784                | -2.954365 | 2.142079  |
| 34               | 1                | 0              | 2.709156                | -3.464526 | 1.927964  |
| 35               | 6                | 0              | 1.096585                | -1.667094 | -0.443202 |
| 36               | 6                | 0              | 0.232722                | 1.883566  | 1.033970  |
| 37               | 6                | 0              | 1.650880                | -3.019799 | 0.051475  |
| 38               | 1                | 0              | 2.586426                | -3.218046 | -0.480964 |
| 39               | 1                | 0              | 0.982845                | -3.861515 | -0.145629 |

|    |   |   |           |           |           |
|----|---|---|-----------|-----------|-----------|
| 40 | 1 | 0 | -1.160921 | -0.507742 | -2.275699 |
| 41 | 1 | 0 | 1.423773  | -1.451431 | -1.465953 |
| 42 | 1 | 0 | -0.050515 | 0.921490  | 1.462026  |
| 43 | 1 | 0 | 0.255943  | 2.634694  | 1.831376  |
| 44 | 8 | 0 | -0.755185 | 2.312607  | 0.052420  |

1809aab\_model4\_PhOCH2Ph\_pyrrolidine\_CN2\_PRODUCT\_b3lyp631dp\_PCMdmsol.log

Standard orientation:

| Center Number | Atomic Number | Atomic Type | Coordinates (Angstroms) |           |           |
|---------------|---------------|-------------|-------------------------|-----------|-----------|
|               |               |             | X                       | Y         | Z         |
| 1             | 6             | 0           | -0.755858               | 1.696120  | 0.059634  |
| 2             | 6             | 0           | -2.433573               | -0.266872 | -0.544108 |
| 3             | 6             | 0           | 2.245521                | -0.589280 | -0.267555 |
| 4             | 6             | 0           | 1.646161                | -1.870264 | -0.316973 |
| 5             | 6             | 0           | 0.207193                | -2.051230 | -0.708158 |
| 6             | 1             | 0           | -0.006171               | -3.109649 | -0.903350 |
| 7             | 1             | 0           | -0.015310               | -1.486528 | -1.619922 |
| 8             | 6             | 0           | 0.642993                | 1.085389  | 0.541107  |
| 9             | 1             | 0           | 0.379419                | 0.254320  | 1.189818  |
| 10            | 6             | 0           | -1.972828               | -1.438768 | 0.080076  |
| 11            | 8             | 0           | -0.631097               | -1.593245 | 0.373029  |
| 12            | 6             | 0           | -1.586882               | 1.872650  | 1.267796  |
| 13            | 7             | 0           | -2.219631               | 2.002565  | 2.231698  |
| 14            | 6             | 0           | -0.578157               | 3.044029  | -0.528377 |
| 15            | 7             | 0           | -0.464438               | 4.090068  | -1.018818 |
| 16            | 7             | 0           | 1.467083                | 0.580895  | -0.577019 |
| 17            | 6             | 0           | 2.222264                | 1.757699  | -1.070455 |
| 18            | 1             | 0           | 3.128546                | 1.434409  | -1.583451 |
| 19            | 1             | 0           | 1.603351                | 2.271858  | -1.810916 |
| 20            | 6             | 0           | 1.525850                | 2.144734  | 1.249486  |
| 21            | 1             | 0           | 0.939428                | 2.930940  | 1.732751  |
| 22            | 1             | 0           | 2.095649                | 1.642831  | 2.036208  |
| 23            | 6             | 0           | 2.475330                | 2.685402  | 0.147841  |
| 24            | 1             | 0           | 2.257512                | 3.724994  | -0.104308 |
| 25            | 1             | 0           | 3.516775                | 2.641758  | 0.479698  |
| 26            | 6             | 0           | -2.859361               | -2.433962 | 0.491732  |
| 27            | 6             | 0           | -4.229485               | -2.279573 | 0.285545  |
| 28            | 1             | 0           | -2.456341               | -3.312636 | 0.984882  |
| 29            | 1             | 0           | -4.916615               | -3.054549 | 0.611437  |
| 30            | 6             | 0           | -3.815231               | -0.135585 | -0.739187 |
| 31            | 6             | 0           | -4.709118               | -1.126288 | -0.334244 |
| 32            | 1             | 0           | -4.194456               | 0.765056  | -1.214868 |
| 33            | 1             | 0           | -5.773895               | -0.992614 | -0.496923 |
| 34            | 6             | 0           | 3.609045                | -0.505842 | 0.057585  |
| 35            | 6             | 0           | 4.364167                | -1.646828 | 0.326593  |
| 36            | 1             | 0           | 4.093467                | 0.462221  | 0.109701  |
| 37            | 1             | 0           | 5.416439                | -1.543452 | 0.575075  |
| 38            | 6             | 0           | 2.415276                | -3.000677 | -0.023687 |
| 39            | 6             | 0           | 3.768824                | -2.904942 | 0.292684  |
| 40            | 1             | 0           | 1.938877                | -3.976745 | -0.061792 |
| 41            | 1             | 0           | 4.347070                | -3.798121 | 0.506773  |
| 42            | 6             | 0           | -1.509445               | 0.831310  | -1.028140 |
| 43            | 1             | 0           | -0.714841               | 0.451709  | -1.675037 |
| 44            | 1             | 0           | -2.107346               | 1.522126  | -1.626198 |

1901aaa\_model4\_PhCH2OPh\_pyrrolidine\_CN2\_b3lyp631dp\_PCMdmsol.log

Standard orientation:

| Center Number | Atomic Number | Atomic Type | Coordinates (Angstroms) |           |           |
|---------------|---------------|-------------|-------------------------|-----------|-----------|
|               |               |             | X                       | Y         | Z         |
| 1             | 6             | 0           | -4.007242               | -1.907417 | -1.292360 |
| 2             | 6             | 0           | -3.591253               | -0.673406 | -0.803987 |
| 3             | 6             | 0           | -2.422931               | -0.556448 | -0.024127 |
| 4             | 6             | 0           | -1.655265               | -1.724829 | 0.245364  |
| 5             | 6             | 0           | -2.095998               | -2.952585 | -0.246992 |
| 6             | 6             | 0           | -3.262764               | -3.052435 | -1.008640 |
| 7             | 1             | 0           | -4.904633               | -1.971895 | -1.898600 |
| 8             | 1             | 0           | -4.163787               | 0.210325  | -1.055697 |
| 9             | 1             | 0           | -1.517735               | -3.846065 | -0.032450 |

|    |   |   |           |           |           |
|----|---|---|-----------|-----------|-----------|
| 10 | 1 | 0 | -3.580817 | -4.019321 | -1.385237 |
| 11 | 6 | 0 | -1.956082 | 0.722944  | 0.487522  |
| 12 | 6 | 0 | -2.647939 | 1.880676  | 0.714736  |
| 13 | 1 | 0 | -0.898902 | 0.770221  | 0.727471  |
| 14 | 6 | 0 | -4.058681 | 2.062911  | 0.546086  |
| 15 | 7 | 0 | -5.201810 | 2.252527  | 0.436585  |
| 16 | 6 | 0 | -1.948465 | 3.033010  | 1.204610  |
| 17 | 7 | 0 | -1.389210 | 3.972980  | 1.602086  |
| 18 | 6 | 0 | 1.833650  | -0.790798 | 0.995117  |
| 19 | 6 | 0 | 2.147811  | -1.309966 | 2.249352  |
| 20 | 6 | 0 | 2.786428  | -0.027849 | 0.257573  |
| 21 | 6 | 0 | 3.393999  | -1.056582 | 2.837002  |
| 22 | 1 | 0 | 1.417878  | -1.898127 | 2.792193  |
| 23 | 6 | 0 | 4.019272  | 0.226684  | 0.887115  |
| 24 | 6 | 0 | 4.319393  | -0.274467 | 2.157098  |
| 25 | 1 | 0 | 3.617082  | -1.461518 | 3.818918  |
| 26 | 1 | 0 | 4.762739  | 0.822251  | 0.371768  |
| 27 | 1 | 0 | 5.286657  | -0.054877 | 2.599458  |
| 28 | 7 | 0 | 2.483384  | 0.494457  | -0.998812 |
| 29 | 6 | 0 | 3.420036  | 1.420004  | -1.645710 |
| 30 | 1 | 0 | 4.425091  | 0.979842  | -1.763369 |
| 31 | 1 | 0 | 3.528174  | 2.335133  | -1.052991 |
| 32 | 6 | 0 | 2.793557  | 1.653690  | -3.020119 |
| 33 | 1 | 0 | 3.514062  | 2.039498  | -3.745870 |
| 34 | 1 | 0 | 1.968164  | 2.370132  | -2.942528 |
| 35 | 6 | 0 | 1.740087  | -0.280953 | -2.025638 |
| 36 | 6 | 0 | 2.265882  | 0.254959  | -3.369157 |
| 37 | 1 | 0 | 1.491142  | 0.261537  | -4.140528 |
| 38 | 1 | 0 | 3.090338  | -0.370234 | -3.729746 |
| 39 | 1 | 0 | 0.663868  | -0.117016 | -1.923984 |
| 40 | 1 | 0 | 1.918365  | -1.356099 | -1.914914 |
| 41 | 8 | 0 | 0.597081  | -0.939451 | 0.401702  |
| 42 | 6 | 0 | -0.404064 | -1.691831 | 1.095038  |
| 43 | 1 | 0 | -0.603484 | -1.234947 | 2.073445  |
| 44 | 1 | 0 | -0.053971 | -2.714846 | 1.270722  |

1901aab\_model4\_PhCH2OPh\_pyrrolidine\_CN2\_b3lyp631dp\_PCMdmso.log

Standard orientation:

| Center<br>Number | Atomic<br>Number | Atomic<br>Type | Coordinates (Angstroms) |           |           |
|------------------|------------------|----------------|-------------------------|-----------|-----------|
|                  |                  |                | X                       | Y         | Z         |
| 1                | 6                | 0              | 4.453714                | -1.144076 | 1.103058  |
| 2                | 6                | 0              | 3.663939                | -0.157178 | 0.522971  |
| 3                | 6                | 0              | 2.373907                | -0.447548 | 0.034503  |
| 4                | 6                | 0              | 1.872427                | -1.774896 | 0.161829  |
| 5                | 6                | 0              | 2.685535                | -2.749257 | 0.740868  |
| 6                | 6                | 0              | 3.966953                | -2.446748 | 1.207293  |
| 7                | 1                | 0              | 5.439396                | -0.893145 | 1.480533  |
| 8                | 1                | 0              | 4.040465                | 0.857115  | 0.477803  |
| 9                | 1                | 0              | 2.310138                | -3.764051 | 0.830444  |
| 10               | 1                | 0              | 4.574255                | -3.224143 | 1.659724  |
| 11               | 6                | 0              | 1.528827                | 0.583903  | -0.549780 |
| 12               | 6                | 0              | 1.880748                | 1.761012  | -1.150214 |
| 13               | 1                | 0              | 0.460464                | 0.400070  | -0.495581 |
| 14               | 6                | 0              | 3.217102                | 2.203418  | -1.415265 |
| 15               | 7                | 0              | 4.285174                | 2.593845  | -1.663265 |
| 16               | 6                | 0              | 0.848595                | 2.649326  | -1.601557 |
| 17               | 7                | 0              | 0.014587                | 3.375526  | -1.964557 |
| 18               | 6                | 0              | -1.768994               | -1.459622 | -0.304368 |
| 19               | 6                | 0              | -2.219155               | -2.509226 | -1.102205 |
| 20               | 6                | 0              | -2.594066               | -0.330997 | -0.041427 |
| 21               | 6                | 0              | -3.486119               | -2.459086 | -1.695822 |
| 22               | 1                | 0              | -1.578796               | -3.365552 | -1.280164 |
| 23               | 6                | 0              | -3.854140               | -0.302732 | -0.665500 |
| 24               | 6                | 0              | -4.293558               | -1.347056 | -1.484174 |
| 25               | 1                | 0              | -3.819433               | -3.279788 | -2.322949 |
| 26               | 1                | 0              | -4.502330               | 0.551660  | -0.512958 |
| 27               | 1                | 0              | -5.274124               | -1.283081 | -1.946536 |
| 28               | 7                | 0              | -2.125738               | 0.728796  | 0.742317  |
| 29               | 6                | 0              | -2.893519               | 1.979126  | 0.798306  |
| 30               | 1                | 0              | -3.933048               | 1.817655  | 1.130455  |
| 31               | 1                | 0              | -2.928610               | 2.450174  | -0.189772 |
| 32               | 6                | 0              | -2.142581               | 2.801491  | 1.844217  |

|    |   |   |           |           |           |
|----|---|---|-----------|-----------|-----------|
| 33 | 1 | 0 | -2.746032 | 3.620949  | 2.243001  |
| 34 | 1 | 0 | -1.232691 | 3.226282  | 1.405974  |
| 35 | 6 | 0 | -1.462291 | 0.487915  | 2.052778  |
| 36 | 6 | 0 | -1.795526 | 1.734832  | 2.893479  |
| 37 | 1 | 0 | -0.968372 | 2.021884  | 3.548136  |
| 38 | 1 | 0 | -2.669384 | 1.543354  | 3.525877  |
| 39 | 1 | 0 | -0.383747 | 0.372255  | 1.919622  |
| 40 | 1 | 0 | -1.833483 | -0.432538 | 2.518312  |
| 41 | 8 | 0 | -0.506405 | -1.427897 | 0.252960  |
| 42 | 6 | 0 | 0.523032  | -2.199622 | -0.377967 |
| 43 | 1 | 0 | 0.471380  | -2.054421 | -1.465323 |
| 44 | 1 | 0 | 0.378063  | -3.266553 | -0.177896 |

1904aaa\_model4\_PhCH2OPh\_pyrrolidine\_CN2\_ZW\_int\_b3lyp631dp\_PCMdms0\_TS\_CH.log

Standard orientation:

| Center<br>Number | Atomic<br>Number | Atomic<br>Type | Coordinates (Angstroms) |           |           |
|------------------|------------------|----------------|-------------------------|-----------|-----------|
|                  |                  |                | X                       | Y         | Z         |
| 1                | 6                | 0              | 4.075780                | -1.940584 | -0.580622 |
| 2                | 6                | 0              | 3.358564                | -0.801991 | -0.214983 |
| 3                | 6                | 0              | 2.016889                | -0.878267 | 0.189695  |
| 4                | 6                | 0              | 1.392583                | -2.154590 | 0.202772  |
| 5                | 6                | 0              | 2.125084                | -3.285303 | -0.172238 |
| 6                | 6                | 0              | 3.461878                | -3.191043 | -0.557409 |
| 7                | 1                | 0              | 5.114388                | -1.844464 | -0.881857 |
| 8                | 1                | 0              | 3.861262                | 0.155702  | -0.237851 |
| 9                | 1                | 0              | 1.636591                | -4.255446 | -0.159704 |
| 10               | 1                | 0              | 4.012336                | -4.082889 | -0.839848 |
| 11               | 6                | 0              | 1.239423                | 0.339873  | 0.606665  |
| 12               | 6                | 0              | 1.848555                | 1.591254  | 1.038020  |
| 13               | 1                | 0              | 0.475012                | 0.569357  | -0.396254 |
| 14               | 6                | 0              | 2.980355                | 2.202504  | 0.459639  |
| 15               | 7                | 0              | 3.915884                | 2.738452  | -0.001604 |
| 16               | 6                | 0              | 1.146731                | 2.378641  | 1.977330  |
| 17               | 7                | 0              | 0.556304                | 3.022887  | 2.758960  |
| 18               | 6                | 0              | -2.149729               | -1.311733 | -0.053901 |
| 19               | 6                | 0              | -3.025830               | -2.226093 | 0.531813  |
| 20               | 6                | 0              | -2.587055               | 0.003056  | -0.352541 |
| 21               | 6                | 0              | -4.342868               | -1.867691 | 0.818694  |
| 22               | 1                | 0              | -2.670070               | -3.226551 | 0.752695  |
| 23               | 6                | 0              | -3.921807               | 0.339789  | -0.067134 |
| 24               | 6                | 0              | -4.789829               | -0.583506 | 0.510606  |
| 25               | 1                | 0              | -5.012067               | -2.591853 | 1.271465  |
| 26               | 1                | 0              | -4.286702               | 1.333170  | -0.295263 |
| 27               | 1                | 0              | -5.813665               | -0.291845 | 0.719540  |
| 28               | 7                | 0              | -1.721021               | 0.985654  | -0.879700 |
| 29               | 6                | 0              | -2.083465               | 2.425070  | -0.819618 |
| 30               | 1                | 0              | -2.449108               | 2.680486  | 0.177769  |
| 31               | 1                | 0              | -2.882866               | 2.617383  | -1.543762 |
| 32               | 6                | 0              | -0.786234               | 3.151735  | -1.194944 |
| 33               | 1                | 0              | -0.233897               | 3.418802  | -0.290836 |
| 34               | 1                | 0              | -0.982605               | 4.065885  | -1.757245 |
| 35               | 6                | 0              | -0.484735               | 0.796350  | -1.429157 |
| 36               | 6                | 0              | -0.004225               | 2.105668  | -2.009244 |
| 37               | 1                | 0              | -0.274637               | 2.133658  | -3.072737 |
| 38               | 1                | 0              | 1.080334                | 2.219695  | -1.943858 |
| 39               | 1                | 0              | -0.292185               | -0.150201 | -1.920671 |
| 40               | 1                | 0              | 0.435477                | 0.077906  | 1.296588  |
| 41               | 6                | 0              | -0.051562               | -2.343530 | 0.594189  |
| 42               | 1                | 0              | -0.300791               | -3.408701 | 0.599265  |
| 43               | 1                | 0              | -0.272003               | -1.940098 | 1.589321  |
| 44               | 8                | 0              | -0.864250               | -1.650826 | -0.384517 |

1905aaa\_model4\_PhCH2OPh\_pyrrolidine\_CN2\_ZW\_int\_b3lyp631dp\_PCMdms0.log

Standard orientation:

| Center<br>Number | Atomic<br>Number | Atomic<br>Type | Coordinates (Angstroms) |          |           |
|------------------|------------------|----------------|-------------------------|----------|-----------|
|                  |                  |                | X                       | Y        | Z         |
| 1                | 6                | 0              | -2.795313               | 3.513402 | -0.033364 |
| 2                | 6                | 0              | -3.427544               | 2.392155 | 0.507013  |

|    |   |   |           |           |           |
|----|---|---|-----------|-----------|-----------|
| 3  | 6 | 0 | -2.787815 | 1.148129  | 0.579049  |
| 4  | 6 | 0 | -1.467528 | 1.044809  | 0.086643  |
| 5  | 6 | 0 | -0.840711 | 2.168834  | -0.461785 |
| 6  | 6 | 0 | -1.494605 | 3.400875  | -0.521016 |
| 7  | 1 | 0 | -3.317749 | 4.464821  | -0.073718 |
| 8  | 1 | 0 | -4.442272 | 2.479900  | 0.887131  |
| 9  | 1 | 0 | 0.168937  | 2.075676  | -0.846501 |
| 10 | 1 | 0 | -0.989622 | 4.261732  | -0.949108 |
| 11 | 6 | 0 | -3.537488 | -0.043037 | 1.164954  |
| 12 | 6 | 0 | -3.833865 | -1.176539 | 0.181376  |
| 13 | 1 | 0 | -2.965600 | -0.465129 | 2.000389  |
| 14 | 6 | 0 | -3.186734 | -2.404394 | 0.296357  |
| 15 | 7 | 0 | -2.607259 | -3.426047 | 0.420346  |
| 16 | 6 | 0 | -4.739934 | -0.977456 | -0.863888 |
| 17 | 7 | 0 | -5.514442 | -0.785869 | -1.730867 |
| 18 | 6 | 0 | 1.468887  | -1.171448 | 0.070609  |
| 19 | 6 | 0 | 1.013561  | -2.495760 | 0.014245  |
| 20 | 6 | 0 | 2.863791  | -0.935618 | 0.035767  |
| 21 | 6 | 0 | 1.928033  | -3.545701 | -0.073319 |
| 22 | 1 | 0 | -0.047956 | -2.715924 | 0.046775  |
| 23 | 6 | 0 | 3.767175  | -1.996026 | -0.059393 |
| 24 | 6 | 0 | 3.302051  | -3.306579 | -0.109738 |
| 25 | 1 | 0 | 1.553564  | -4.563722 | -0.110462 |
| 26 | 1 | 0 | 4.832446  | -1.796299 | -0.072438 |
| 27 | 1 | 0 | 4.006612  | -4.127926 | -0.173030 |
| 28 | 7 | 0 | 3.367285  | 0.407509  | 0.067197  |
| 29 | 6 | 0 | 4.408283  | 0.879215  | -0.906789 |
| 30 | 1 | 0 | 3.940052  | 0.878070  | -1.894358 |
| 31 | 1 | 0 | 5.244268  | 0.181916  | -0.912672 |
| 32 | 6 | 0 | 4.770421  | 2.279698  | -0.387133 |
| 33 | 1 | 0 | 4.911157  | 2.984841  | -1.205992 |
| 34 | 1 | 0 | 5.694751  | 2.238038  | 0.192209  |
| 35 | 6 | 0 | 2.933813  | 1.368973  | 0.815577  |
| 36 | 6 | 0 | 3.587718  | 2.669689  | 0.530264  |
| 37 | 1 | 0 | 3.880657  | 3.176316  | 1.454016  |
| 38 | 1 | 0 | 2.853512  | 3.321713  | 0.037164  |
| 39 | 1 | 0 | 2.153075  | 1.191860  | 1.544096  |
| 40 | 1 | 0 | -4.468794 | 0.333943  | 1.606294  |
| 41 | 6 | 0 | -0.761956 | -0.290152 | 0.098970  |
| 42 | 1 | 0 | -1.060032 | -0.893707 | 0.960164  |
| 43 | 1 | 0 | -1.003714 | -0.864529 | -0.802949 |
| 44 | 8 | 0 | 0.664522  | -0.083645 | 0.153731  |

-----  
1909aaa\_model4\_PhCH2OPh\_pyrrolidine\_CN2\_PRODUCT\_b3lyp631dp\_PCmDmso.log

Standard orientation:

| Center<br>Number | Atomic<br>Number | Atomic<br>Type | Coordinates (Angstroms) |           |           |
|------------------|------------------|----------------|-------------------------|-----------|-----------|
|                  |                  |                | X                       | Y         | Z         |
| 1                | 6                | 0              | 4.655227                | -0.376001 | -0.213631 |
| 2                | 6                | 0              | 3.510200                | 0.180402  | -0.784392 |
| 3                | 6                | 0              | 2.251809                | -0.413636 | -0.620606 |
| 4                | 6                | 0              | 2.151961                | -1.604842 | 0.130639  |
| 5                | 6                | 0              | 3.306417                | -2.150738 | 0.703382  |
| 6                | 6                | 0              | 4.552852                | -1.546455 | 0.536986  |
| 7                | 1                | 0              | 5.618875                | 0.103017  | -0.356918 |
| 8                | 1                | 0              | 3.594370                | 1.090464  | -1.372267 |
| 9                | 1                | 0              | 3.225976                | -3.065904 | 1.283731  |
| 10               | 1                | 0              | 5.434938                | -1.988400 | 0.989954  |
| 11               | 6                | 0              | 1.034558                | 0.248267  | -1.232054 |
| 12               | 6                | 0              | 0.475459                | 1.495095  | -0.418438 |
| 13               | 1                | 0              | 0.214751                | -0.455372 | -1.345257 |
| 14               | 6                | 0              | 1.135314                | 2.700922  | -0.956829 |
| 15               | 7                | 0              | 1.649356                | 3.635400  | -1.416662 |
| 16               | 6                | 0              | 0.817235                | 1.429281  | 1.015887  |
| 17               | 7                | 0              | 1.103732                | 1.440416  | 2.140272  |
| 18               | 6                | 0              | -1.459038               | -1.698400 | 0.194833  |
| 19               | 6                | 0              | -1.941415               | -2.974038 | -0.123889 |
| 20               | 6                | 0              | -2.276615               | -0.560139 | 0.003448  |
| 21               | 6                | 0              | -3.230199               | -3.131919 | -0.634571 |
| 22               | 1                | 0              | -1.318150               | -3.845020 | 0.045550  |
| 23               | 6                | 0              | -3.564885               | -0.749388 | -0.514880 |
| 24               | 6                | 0              | -4.046127               | -2.019053 | -0.835070 |
| 25               | 1                | 0              | -3.591605               | -4.128164 | -0.870569 |

|    |   |   |           |           |           |
|----|---|---|-----------|-----------|-----------|
| 26 | 1 | 0 | -4.194504 | 0.120547  | -0.675136 |
| 27 | 1 | 0 | -5.046732 | -2.134719 | -1.239313 |
| 28 | 7 | 0 | -1.810182 | 0.736530  | 0.377144  |
| 29 | 6 | 0 | -2.652857 | 1.516852  | 1.308028  |
| 30 | 1 | 0 | -2.561611 | 1.120725  | 2.325199  |
| 31 | 1 | 0 | -3.714604 | 1.469620  | 1.027548  |
| 32 | 6 | 0 | -2.134314 | 2.949469  | 1.174993  |
| 33 | 1 | 0 | -1.280414 | 3.116251  | 1.837402  |
| 34 | 1 | 0 | -2.900122 | 3.689653  | 1.418659  |
| 35 | 6 | 0 | -1.128502 | 1.603919  | -0.579252 |
| 36 | 6 | 0 | -1.703712 | 3.007609  | -0.297601 |
| 37 | 1 | 0 | -2.582372 | 3.141178  | -0.937358 |
| 38 | 1 | 0 | -1.011571 | 3.821167  | -0.521712 |
| 39 | 1 | 0 | 1.272308  | 0.617145  | -2.233331 |
| 40 | 1 | 0 | -1.316920 | 1.300514  | -1.614709 |
| 41 | 8 | 0 | -0.201812 | -1.488647 | 0.697148  |
| 42 | 6 | 0 | 0.851369  | -2.366707 | 0.258990  |
| 43 | 1 | 0 | 0.576522  | -2.801457 | -0.710213 |
| 44 | 1 | 0 | 0.966614  | -3.191485 | 0.970445  |

1909aab\_model4\_PhCH2OPh\_pyrrolidine\_CN2\_PRODUCT\_b3lyp631dp\_PCMdmsol.log

Standard orientation:

| Center<br>Number | Atomic<br>Number | Atomic<br>Type | Coordinates (Angstroms) |           |           |
|------------------|------------------|----------------|-------------------------|-----------|-----------|
|                  |                  |                | X                       | Y         | Z         |
| 1                | 6                | 0              | -0.670380               | 1.650671  | -0.101154 |
| 2                | 6                | 0              | -2.393876               | -0.311893 | -0.548522 |
| 3                | 6                | 0              | 2.316090                | -0.557736 | -0.258674 |
| 4                | 6                | 0              | 1.547651                | -1.742672 | -0.321716 |
| 5                | 6                | 0              | 0.684852                | 1.105192  | 0.534572  |
| 6                | 1                | 0              | 0.394374                | 0.239366  | 1.127270  |
| 7                | 6                | 0              | -2.109549               | -1.560697 | 0.046847  |
| 8                | 6                | 0              | -1.575250               | 1.973267  | 1.023126  |
| 9                | 7                | 0              | -2.262311               | 2.211008  | 1.927594  |
| 10               | 6                | 0              | -0.426189               | 2.917823  | -0.825999 |
| 11               | 7                | 0              | -0.258095               | 3.902573  | -1.417211 |
| 12               | 7                | 0              | 1.683220                | 0.702660  | -0.473193 |
| 13               | 6                | 0              | 2.556290                | 1.877091  | -0.675439 |
| 14               | 1                | 0              | 3.492646                | 1.584546  | -1.149576 |
| 15               | 1                | 0              | 2.054887                | 2.564104  | -1.360564 |
| 16               | 6                | 0              | 1.379873                | 2.186517  | 1.427638  |
| 17               | 1                | 0              | 0.751202                | 3.072666  | 1.547281  |
| 18               | 1                | 0              | 1.551616                | 1.787362  | 2.429924  |
| 19               | 6                | 0              | 2.711374                | 2.524371  | 0.712772  |
| 20               | 1                | 0              | 2.886953                | 3.601209  | 0.647433  |
| 21               | 1                | 0              | 3.555091                | 2.082866  | 1.252041  |
| 22               | 6                | 0              | -3.170394               | -2.368663 | 0.479834  |
| 23               | 6                | 0              | -4.497774               | -1.969513 | 0.359343  |
| 24               | 1                | 0              | -2.943915               | -3.336221 | 0.921409  |
| 25               | 1                | 0              | -5.295378               | -2.619224 | 0.706432  |
| 26               | 6                | 0              | -3.742228               | 0.064003  | -0.673554 |
| 27               | 6                | 0              | -4.786421               | -0.738389 | -0.224494 |
| 28               | 1                | 0              | -3.973222               | 1.017713  | -1.140391 |
| 29               | 1                | 0              | -5.813718               | -0.406820 | -0.339119 |
| 30               | 6                | 0              | 3.693200                | -0.703458 | -0.019736 |
| 31               | 6                | 0              | 4.276831                | -1.958237 | 0.155124  |
| 32               | 1                | 0              | 4.325271                | 0.173575  | 0.048877  |
| 33               | 1                | 0              | 5.344387                | -2.025000 | 0.341489  |
| 34               | 6                | 0              | 2.130086                | -2.995271 | -0.135445 |
| 35               | 6                | 0              | 3.497945                | -3.111818 | 0.106553  |
| 36               | 1                | 0              | 1.504132                | -3.878635 | -0.214666 |
| 37               | 1                | 0              | 3.946431                | -4.090725 | 0.242121  |
| 38               | 6                | 0              | -1.370273               | 0.660280  | -1.119755 |
| 39               | 1                | 0              | -0.561819               | 0.155089  | -1.643014 |
| 40               | 1                | 0              | -1.896232               | 1.287647  | -1.842632 |
| 41               | 6                | 0              | -0.721295               | -2.094588 | 0.329184  |
| 42               | 1                | 0              | -0.391562               | -1.785401 | 1.333874  |
| 43               | 1                | 0              | -0.751679               | -3.192260 | 0.334877  |
| 44               | 8                | 0              | 0.212183                | -1.627906 | -0.640803 |

251aa\_model4\_Naft\_Pirrolidin\_CN2\_b3lyp631dp\_PCMdmsol.log

Standard orientation:

| Center<br>Number | Atomic<br>Number | Atomic<br>Type | Coordinates (Angstroms) |           |           |
|------------------|------------------|----------------|-------------------------|-----------|-----------|
|                  |                  |                | X                       | Y         | Z         |
| 1                | 6                | 0              | -2.623463               | 2.559078  | -0.543038 |
| 2                | 6                | 0              | -3.432328               | 1.480154  | -0.268009 |
| 3                | 6                | 0              | -2.875332               | 0.185140  | -0.083939 |
| 4                | 6                | 0              | -1.460282               | 0.020989  | -0.205209 |
| 5                | 6                | 0              | -0.640926               | 1.148092  | -0.517503 |
| 6                | 6                | 0              | -1.223157               | 2.395476  | -0.664707 |
| 7                | 1                | 0              | -4.745252               | -0.827149 | 0.323288  |
| 8                | 1                | 0              | -3.054270               | 3.546276  | -0.675502 |
| 9                | 1                | 0              | -4.507257               | 1.606163  | -0.176332 |
| 10               | 6                | 0              | -3.669231               | -0.947656 | 0.237838  |
| 11               | 6                | 0              | -0.877305               | -1.254081 | 0.034673  |
| 12               | 1                | 0              | -0.603881               | 3.252652  | -0.908270 |
| 13               | 6                | 0              | -1.680268               | -2.330532 | 0.360001  |
| 14               | 6                | 0              | -3.083509               | -2.176453 | 0.450219  |
| 15               | 1                | 0              | -1.232530               | -3.301652 | 0.548654  |
| 16               | 1                | 0              | -3.696790               | -3.036478 | 0.700279  |
| 17               | 6                | 0              | 0.808823                | 0.967130  | -0.741217 |
| 18               | 6                | 0              | 1.777653                | 1.656740  | -0.049462 |
| 19               | 1                | 0              | 1.123841                | 0.459259  | -1.646126 |
| 20               | 6                | 0              | 1.497708                | 2.429969  | 1.121398  |
| 21               | 7                | 0              | 1.300930                | 3.067255  | 2.076640  |
| 22               | 6                | 0              | 3.147036                | 1.589354  | -0.455847 |
| 23               | 7                | 0              | 4.261313                | 1.529823  | -0.791570 |
| 24               | 7                | 0              | 0.548902                | -1.343537 | -0.068883 |
| 25               | 6                | 0              | 1.316058                | -1.571202 | 1.186217  |
| 26               | 1                | 0              | 1.720504                | -0.610015 | 1.532243  |
| 27               | 1                | 0              | 0.664433                | -1.958867 | 1.975544  |
| 28               | 6                | 0              | 2.438366                | -2.555967 | 0.808111  |
| 29               | 6                | 0              | 1.091716                | -2.217030 | -1.135679 |
| 30               | 1                | 0              | 0.971471                | -1.739531 | -2.114339 |
| 31               | 1                | 0              | 0.559808                | -3.178542 | -1.168609 |
| 32               | 6                | 0              | 2.548594                | -2.419281 | -0.719802 |
| 33               | 1                | 0              | 2.997845                | -3.292498 | -1.199140 |
| 34               | 1                | 0              | 3.145696                | -1.540475 | -0.986566 |
| 35               | 1                | 0              | 2.143757                | -3.577930 | 1.068966  |
| 36               | 1                | 0              | 3.373693                | -2.335512 | 1.328342  |

253ab\_model4\_Naft\_Pirrolidin\_CN2\_b3lyp631dp\_PCmDmso\_TS\_2.log

Standard orientation:

| Center<br>Number | Atomic<br>Number | Atomic<br>Type | Coordinates (Angstroms) |           |           |
|------------------|------------------|----------------|-------------------------|-----------|-----------|
|                  |                  |                | X                       | Y         | Z         |
| 1                | 6                | 0              | -2.948251               | 2.244807  | -0.867879 |
| 2                | 6                | 0              | -3.532698               | 1.104223  | -0.371089 |
| 3                | 6                | 0              | -2.747438               | -0.033939 | -0.047575 |
| 4                | 6                | 0              | -1.324561               | -0.005409 | -0.260526 |
| 5                | 6                | 0              | -0.726803               | 1.241004  | -0.664215 |
| 6                | 6                | 0              | -1.545739               | 2.307991  | -0.998526 |
| 7                | 1                | 0              | -4.435663               | -1.170929 | 0.678711  |
| 8                | 1                | 0              | -3.551912               | 3.108035  | -1.128395 |
| 9                | 1                | 0              | -4.606047               | 1.055022  | -0.213301 |
| 10               | 6                | 0              | -3.362414               | -1.183796 | 0.514571  |
| 11               | 6                | 0              | -0.610482               | -1.229603 | -0.016550 |
| 12               | 1                | 0              | -1.087086               | 3.235003  | -1.330209 |
| 13               | 6                | 0              | -1.234882               | -2.313882 | 0.577797  |
| 14               | 6                | 0              | -2.614069               | -2.285162 | 0.860519  |
| 15               | 1                | 0              | -0.668649               | -3.216677 | 0.776740  |
| 16               | 1                | 0              | -3.083449               | -3.153295 | 1.311132  |
| 17               | 6                | 0              | 0.753978                | 1.496200  | -0.644625 |
| 18               | 6                | 0              | 1.440275                | 1.471798  | 0.643299  |
| 19               | 1                | 0              | 1.034226                | 2.356003  | -1.257875 |
| 20               | 6                | 0              | 0.894952                | 0.941148  | 1.828778  |
| 21               | 7                | 0              | 0.470075                | 0.516647  | 2.836125  |
| 22               | 6                | 0              | 2.754491                | 1.981643  | 0.723554  |
| 23               | 7                | 0              | 3.846378                | 2.404462  | 0.772286  |
| 24               | 7                | 0              | 0.733085                | -1.363740 | -0.436123 |
| 25               | 6                | 0              | 1.759395                | -2.155965 | 0.280556  |
| 26               | 1                | 0              | 1.725031                | -1.928851 | 1.348028  |



|    |   |   |          |           |           |
|----|---|---|----------|-----------|-----------|
| 27 | 1 | 0 | 1.557157 | -3.223860 | 0.139168  |
| 28 | 6 | 0 | 3.063594 | -1.731013 | -0.412209 |
| 29 | 6 | 0 | 1.188684 | -0.839671 | -1.600405 |
| 30 | 1 | 0 | 1.234901 | 0.573722  | -1.334230 |
| 31 | 1 | 0 | 0.479650 | -0.728856 | -2.418750 |
| 32 | 6 | 0 | 2.611390 | -1.296189 | -1.823235 |
| 33 | 1 | 0 | 2.593777 | -2.142227 | -2.522587 |
| 34 | 1 | 0 | 3.241166 | -0.521735 | -2.266504 |
| 35 | 1 | 0 | 3.792898 | -2.542223 | -0.438221 |
| 36 | 1 | 0 | 3.510702 | -0.885828 | 0.116838  |

255ab\_model4\_Naft\_Pirrolidin\_CN2\_INT\_b3lyp631dp\_PCMdms0.log

Standard orientation:

| Center<br>Number | Atomic<br>Number | Atomic<br>Type | Coordinates (Angstroms) |           |           |
|------------------|------------------|----------------|-------------------------|-----------|-----------|
|                  |                  |                | X                       | Y         | Z         |
| 1                | 6                | 0              | 3.273776                | -1.674046 | -1.135814 |
| 2                | 6                | 0              | 3.659554                | -0.516407 | -0.509573 |
| 3                | 6                | 0              | 2.688387                | 0.413745  | -0.052620 |
| 4                | 6                | 0              | 1.285295                | 0.163603  | -0.276495 |
| 5                | 6                | 0              | 0.901467                | -1.108404 | -0.834630 |
| 6                | 6                | 0              | 1.899737                | -1.967502 | -1.262878 |
| 7                | 1                | 0              | 4.179721                | 1.716105  | 0.805748  |
| 8                | 1                | 0              | 4.011708                | -2.385217 | -1.492755 |
| 9                | 1                | 0              | 4.709024                | -0.293788 | -0.342267 |
| 10               | 6                | 0              | 3.115267                | 1.574531  | 0.644794  |
| 11               | 6                | 0              | 0.400541                | 1.218082  | 0.132832  |
| 12               | 1                | 0              | 1.608750                | -2.925731 | -1.683226 |
| 13               | 6                | 0              | 0.842522                | 2.320707  | 0.838667  |
| 14               | 6                | 0              | 2.211085                | 2.492935  | 1.119555  |
| 15               | 1                | 0              | 0.141567                | 3.093736  | 1.130328  |
| 16               | 1                | 0              | 2.539054                | 3.369618  | 1.667001  |
| 17               | 6                | 0              | -0.521748               | -1.639990 | -0.873226 |
| 18               | 6                | 0              | -1.195617               | -1.687615 | 0.492986  |
| 19               | 1                | 0              | -0.480754               | -2.634282 | -1.337153 |
| 20               | 6                | 0              | -0.458914               | -1.780390 | 1.679889  |
| 21               | 7                | 0              | 0.156138                | -1.840178 | 2.681809  |
| 22               | 6                | 0              | -2.573395               | -1.913823 | 0.558877  |
| 23               | 7                | 0              | -3.740505               | -2.075354 | 0.581812  |
| 24               | 7                | 0              | -0.980556               | 1.258660  | -0.284074 |
| 25               | 6                | 0              | -2.105992               | 1.618045  | 0.641196  |
| 26               | 1                | 0              | -2.050968               | 0.978470  | 1.519908  |
| 27               | 1                | 0              | -1.973056               | 2.661033  | 0.938788  |
| 28               | 6                | 0              | -3.357116               | 1.407380  | -0.229677 |
| 29               | 6                | 0              | -1.368627               | 1.196513  | -1.519701 |
| 30               | 1                | 0              | -1.154869               | -1.051468 | -1.557184 |
| 31               | 1                | 0              | -0.645892               | 1.065027  | -2.316743 |
| 32               | 6                | 0              | -2.826694               | 1.430391  | -1.683191 |
| 33               | 1                | 0              | -2.955773               | 2.406193  | -2.172095 |
| 34               | 1                | 0              | -3.286888               | 0.689511  | -2.342913 |
| 35               | 1                | 0              | -4.099785               | 2.185359  | -0.051290 |
| 36               | 1                | 0              | -3.804536               | 0.437004  | -0.008934 |

256aa\_model4\_Naft\_Pirrolidin\_CN2\_TERMEK1\_b3lyp631dp\_PCMdms0.log

Standard orientation:

| Center<br>Number | Atomic<br>Number | Atomic<br>Type | Coordinates (Angstroms) |           |           |
|------------------|------------------|----------------|-------------------------|-----------|-----------|
|                  |                  |                | X                       | Y         | Z         |
| 1                | 6                | 0              | 2.913292                | -2.466316 | 0.021046  |
| 2                | 6                | 0              | 3.577391                | -1.278595 | 0.208422  |
| 3                | 6                | 0              | 2.901455                | -0.032907 | 0.086227  |
| 4                | 6                | 0              | 1.487902                | -0.019314 | -0.174369 |
| 5                | 6                | 0              | 0.846545                | -1.269217 | -0.475545 |
| 6                | 6                | 0              | 1.552880                | -2.452426 | -0.357899 |
| 7                | 1                | 0              | 4.690908                | 1.156495  | 0.355009  |
| 8                | 1                | 0              | 3.436180                | -3.412919 | 0.115776  |
| 9                | 1                | 0              | 4.639289                | -1.268974 | 0.437896  |
| 10               | 6                | 0              | 3.620240                | 1.188211  | 0.177138  |
| 11               | 6                | 0              | 0.806127                | 1.254295  | -0.173312 |
| 12               | 1                | 0              | 1.059259                | -3.388815 | -0.601410 |

|    |   |   |           |           |           |
|----|---|---|-----------|-----------|-----------|
| 13 | 6 | 0 | 1.563396  | 2.422187  | -0.156256 |
| 14 | 6 | 0 | 2.963916  | 2.383447  | 0.005047  |
| 15 | 1 | 0 | 1.079311  | 3.387690  | -0.221794 |
| 16 | 1 | 0 | 3.512841  | 3.320095  | 0.033951  |
| 17 | 6 | 0 | -0.534118 | -1.316228 | -1.090504 |
| 18 | 6 | 0 | -1.702097 | -0.963758 | -0.113073 |
| 19 | 1 | 0 | -0.719795 | -2.303690 | -1.517663 |
| 20 | 6 | 0 | -2.937082 | -0.813032 | -0.907167 |
| 21 | 7 | 0 | -3.889510 | -0.696476 | -1.560181 |
| 22 | 6 | 0 | -1.920074 | -2.054920 | 0.855954  |
| 23 | 7 | 0 | -2.063116 | -2.902441 | 1.635591  |
| 24 | 7 | 0 | -0.600699 | 1.301119  | -0.166373 |
| 25 | 6 | 0 | -1.322281 | 0.351617  | 0.688576  |
| 26 | 1 | 0 | -0.598733 | -0.587227 | -1.902188 |
| 27 | 1 | 0 | -0.672438 | 0.000744  | 1.496435  |
| 28 | 6 | 0 | -2.530075 | 1.133952  | 1.238954  |
| 29 | 6 | 0 | -1.283011 | 2.608728  | -0.160400 |
| 30 | 1 | 0 | -1.191476 | 3.093577  | -1.136948 |
| 31 | 1 | 0 | -0.840827 | 3.276137  | 0.593875  |
| 32 | 6 | 0 | -2.722320 | 2.273451  | 0.225144  |
| 33 | 1 | 0 | -3.242443 | 3.133358  | 0.652462  |
| 34 | 1 | 0 | -3.287211 | 1.931706  | -0.646013 |
| 35 | 1 | 0 | -2.267187 | 1.542573  | 2.218862  |
| 36 | 1 | 0 | -3.416926 | 0.508791  | 1.370598  |

256ab\_model4\_Naft\_Pirrolidin\_CN2\_TERMEK1\_b3lyp631dp\_PCMdmsol.log

Standard orientation:

| Center<br>Number | Atomic<br>Number | Atomic<br>Type | Coordinates (Angstroms) |           |           |
|------------------|------------------|----------------|-------------------------|-----------|-----------|
|                  |                  |                | X                       | Y         | Z         |
| 1                | 6                | 0              | 3.114581                | -2.402953 | 0.268919  |
| 2                | 6                | 0              | 3.701751                | -1.169804 | 0.157624  |
| 3                | 6                | 0              | 2.920683                | -0.002356 | -0.057944 |
| 4                | 6                | 0              | 1.480942                | -0.090587 | -0.171884 |
| 5                | 6                | 0              | 0.911559                | -1.415015 | -0.167296 |
| 6                | 6                | 0              | 1.722761                | -2.511422 | 0.087729  |
| 7                | 1                | 0              | 4.675538                | 1.259851  | -0.049571 |
| 8                | 1                | 0              | 3.707687                | -3.291500 | 0.460453  |
| 9                | 1                | 0              | 4.778337                | -1.055980 | 0.246535  |
| 10               | 6                | 0              | 3.592936                | 1.245693  | -0.130213 |
| 11               | 6                | 0              | 0.751432                | 1.164599  | -0.231644 |
| 12               | 1                | 0              | 1.273112                | -3.499754 | 0.103784  |
| 13               | 6                | 0              | 1.471185                | 2.355521  | -0.321443 |
| 14               | 6                | 0              | 2.875665                | 2.403007  | -0.287062 |
| 15               | 1                | 0              | 0.935313                | 3.291838  | -0.398826 |
| 16               | 1                | 0              | 3.375995                | 3.363963  | -0.359620 |
| 17               | 6                | 0              | -0.481076               | -1.794857 | -0.633889 |
| 18               | 6                | 0              | -1.710828               | -0.985943 | -0.132372 |
| 19               | 1                | 0              | -0.645937               | -2.844688 | -0.385753 |
| 20               | 6                | 0              | -1.766520               | -0.961767 | 1.342377  |
| 21               | 7                | 0              | -1.809085               | -0.964220 | 2.501803  |
| 22               | 6                | 0              | -2.916014               | -1.682347 | -0.629106 |
| 23               | 7                | 0              | -3.846668               | -2.233375 | -1.049662 |
| 24               | 7                | 0              | -0.640990               | 1.266921  | -0.039847 |
| 25               | 6                | 0              | -1.216165               | 2.549775  | 0.407690  |
| 26               | 1                | 0              | -0.708840               | 2.886821  | 1.315945  |
| 27               | 1                | 0              | -1.110273               | 3.338515  | -0.352830 |
| 28               | 6                | 0              | -2.692650               | 2.227926  | 0.604149  |
| 29               | 6                | 0              | -1.653304               | 0.473237  | -0.727323 |
| 30               | 1                | 0              | -0.522362               | -1.727654 | -1.728554 |
| 31               | 1                | 0              | -1.415382               | 0.328329  | -1.788980 |
| 32               | 6                | 0              | -2.962484               | 1.282586  | -0.572448 |
| 33               | 1                | 0              | -3.120873               | 1.859902  | -1.488164 |
| 34               | 1                | 0              | -3.840069               | 0.647728  | -0.434540 |
| 35               | 1                | 0              | -3.318977               | 3.122443  | 0.577850  |
| 36               | 1                | 0              | -2.852783               | 1.723140  | 1.561019  |

931aa\_model1B\_chexene\_Me\_CN2\_b3lyp631dp.log

Standard orientation:

| Center | Atomic | Atomic | Coordinates (Angstroms) |   |   |
|--------|--------|--------|-------------------------|---|---|
| Number | Number | Type   | X                       | Y | Z |

| Number | Number | Type | X         | Y         | Z         |
|--------|--------|------|-----------|-----------|-----------|
| 1      | 6      | 0    | -4.078950 | -0.905449 | 0.412425  |
| 2      | 6      | 0    | -3.170291 | 0.306651  | 0.193390  |
| 3      | 6      | 0    | -1.705754 | -0.048688 | -0.028234 |
| 4      | 6      | 0    | -1.297636 | -1.376926 | -0.117552 |
| 5      | 6      | 0    | -2.305177 | -2.485220 | -0.362311 |
| 6      | 6      | 0    | -3.734834 | -1.992403 | -0.601049 |
| 7      | 1      | 0    | -3.944635 | -1.300141 | 1.428755  |
| 8      | 1      | 0    | -3.532623 | 0.882424  | -0.669069 |
| 9      | 1      | 0    | -1.979317 | -3.084384 | -1.220138 |
| 10     | 1      | 0    | -4.423614 | -2.841378 | -0.537465 |
| 11     | 6      | 0    | 0.433739  | -3.129286 | -0.370465 |
| 12     | 1      | 0    | 0.070399  | -3.385598 | -1.366746 |
| 13     | 1      | 0    | 1.523966  | -3.155731 | -0.401980 |
| 14     | 1      | 0    | 0.090402  | -3.894176 | 0.340363  |
| 15     | 6      | 0    | 0.916710  | -1.189518 | 1.023686  |
| 16     | 1      | 0    | 0.394766  | -0.355404 | 1.496369  |
| 17     | 1      | 0    | 1.079485  | -1.941710 | 1.812115  |
| 18     | 7      | 0    | 0.021102  | -1.778297 | 0.016253  |
| 19     | 6      | 0    | -0.754252 | 0.992912  | -0.246129 |
| 20     | 6      | 0    | -0.876753 | 2.365926  | -0.148666 |
| 21     | 1      | 0    | 0.212769  | 0.677592  | -0.624276 |
| 22     | 6      | 0    | -1.993147 | 3.084397  | 0.382516  |
| 23     | 7      | 0    | -2.871610 | 3.711073  | 0.822573  |
| 24     | 6      | 0    | 0.213607  | 3.183996  | -0.588617 |
| 25     | 7      | 0    | 1.102432  | 3.844571  | -0.950499 |
| 26     | 1      | 0    | -2.283169 | -3.171337 | 0.497805  |
| 27     | 1      | 0    | -3.823268 | -1.585907 | -1.616544 |
| 28     | 1      | 0    | -5.126504 | -0.599334 | 0.328506  |
| 29     | 1      | 0    | -3.253899 | 0.983222  | 1.049240  |
| 30     | 6      | 0    | 2.274465  | -0.732869 | 0.510807  |
| 31     | 6      | 0    | 3.287425  | -0.471976 | 1.443896  |
| 32     | 6      | 0    | 2.545643  | -0.540368 | -0.847534 |
| 33     | 6      | 0    | 4.535134  | -0.011768 | 1.029835  |
| 34     | 1      | 0    | 3.094505  | -0.625261 | 2.503394  |
| 35     | 6      | 0    | 3.798389  | -0.083231 | -1.264913 |
| 36     | 1      | 0    | 1.775617  | -0.752448 | -1.583415 |
| 37     | 6      | 0    | 4.794824  | 0.184877  | -0.328800 |
| 38     | 1      | 0    | 5.306183  | 0.192117  | 1.766885  |
| 39     | 1      | 0    | 3.989797  | 0.065635  | -2.323296 |
| 40     | 1      | 0    | 5.766828  | 0.544033  | -0.652496 |

931aa\_model1B\_chexene\_Me\_CN2\_b3lyp631dp\_PCMacn.log

Standard orientation:

| Center Number | Atomic Number | Atomic Type | Coordinates (Angstroms) |           |           |
|---------------|---------------|-------------|-------------------------|-----------|-----------|
|               |               |             | X                       | Y         | Z         |
| 1             | 6             | 0           | -4.053971               | -0.893069 | 0.323660  |
| 2             | 6             | 0           | -3.123049               | 0.318161  | 0.227073  |
| 3             | 6             | 0           | -1.653380               | -0.040196 | 0.038118  |
| 4             | 6             | 0           | -1.260889               | -1.395888 | -0.059659 |
| 5             | 6             | 0           | -2.271117               | -2.448170 | -0.475649 |
| 6             | 6             | 0           | -3.674081               | -1.903139 | -0.754583 |
| 7             | 1             | 0           | -3.966536               | -1.363330 | 1.312061  |
| 8             | 1             | 0           | -3.446005               | 0.950346  | -0.610759 |
| 9             | 1             | 0           | -1.892848               | -2.963638 | -1.365814 |
| 10            | 1             | 0           | -4.377165               | -2.740810 | -0.793811 |
| 11            | 6             | 0           | 0.374054                | -3.241196 | -0.091141 |
| 12            | 1             | 0           | 0.071883                | -3.527997 | -1.097960 |
| 13            | 1             | 0           | 1.459542                | -3.314095 | -0.033742 |
| 14            | 1             | 0           | -0.063727               | -3.940881 | 0.629788  |
| 15            | 6             | 0           | 0.924646                | -1.192747 | 1.133271  |
| 16            | 1             | 0           | 0.406410                | -0.356316 | 1.605440  |
| 17            | 1             | 0           | 1.143611                | -1.915758 | 1.930047  |
| 18            | 7             | 0           | -0.009458               | -1.852452 | 0.207298  |
| 19            | 6             | 0           | -0.706114               | 0.978726  | -0.158143 |
| 20            | 6             | 0           | -0.841738               | 2.371740  | -0.122503 |
| 21            | 1             | 0           | 0.285845                | 0.667085  | -0.467092 |
| 22            | 6             | 0           | -1.977159               | 3.113392  | 0.310316  |
| 23            | 7             | 0           | -2.865183               | 3.782908  | 0.667033  |
| 24            | 6             | 0           | 0.266940                | 3.173438  | -0.522071 |
| 25            | 7             | 0           | 1.172623                | 3.834620  | -0.848276 |

|    |   |   |           |           |           |
|----|---|---|-----------|-----------|-----------|
| 26 | 1 | 0 | -2.317098 | -3.212446 | 0.312080  |
| 27 | 1 | 0 | -3.700216 | -1.416975 | -1.737713 |
| 28 | 1 | 0 | -5.093000 | -0.566131 | 0.216758  |
| 29 | 1 | 0 | -3.228475 | 0.935414  | 1.126063  |
| 30 | 6 | 0 | 2.240079  | -0.729621 | 0.524788  |
| 31 | 6 | 0 | 3.257872  | -0.300934 | 1.389813  |
| 32 | 6 | 0 | 2.472706  | -0.707168 | -0.854571 |
| 33 | 6 | 0 | 4.475583  | 0.150787  | 0.885089  |
| 34 | 1 | 0 | 3.093275  | -0.320072 | 2.464337  |
| 35 | 6 | 0 | 3.696303  | -0.257733 | -1.361683 |
| 36 | 1 | 0 | 1.699407  | -1.044735 | -1.538246 |
| 37 | 6 | 0 | 4.699562  | 0.173406  | -0.495231 |
| 38 | 1 | 0 | 5.251842  | 0.482275  | 1.568338  |
| 39 | 1 | 0 | 3.860297  | -0.248353 | -2.435076 |
| 40 | 1 | 0 | 5.649593  | 0.522154  | -0.888462 |

931aa\_model1B\_chexene\_Me\_CN2\_b3lyp631dp\_PCMdce.log

Standard orientation:

| Center<br>Number | Atomic<br>Number | Atomic<br>Type | Coordinates (Angstroms) |           |           |
|------------------|------------------|----------------|-------------------------|-----------|-----------|
|                  |                  |                | X                       | Y         | Z         |
| 1                | 6                | 0              | -4.056426               | -0.899499 | 0.329684  |
| 2                | 6                | 0              | -3.128602               | 0.312822  | 0.219410  |
| 3                | 6                | 0              | -1.658403               | -0.043639 | 0.031152  |
| 4                | 6                | 0              | -1.262227               | -1.395246 | -0.064072 |
| 5                | 6                | 0              | -2.271413               | -2.456389 | -0.460957 |
| 6                | 6                | 0              | -3.677553               | -1.919488 | -0.739394 |
| 7                | 1                | 0              | -3.965439               | -1.359904 | 1.322492  |
| 8                | 1                | 0              | -3.454716               | 0.937187  | -0.623046 |
| 9                | 1                | 0              | -1.897427               | -2.982936 | -1.346423 |
| 10               | 1                | 0              | -4.378294               | -2.759682 | -0.767459 |
| 11               | 6                | 0              | 0.387018                | -3.229634 | -0.115262 |
| 12               | 1                | 0              | 0.079615                | -3.515423 | -1.120964 |
| 13               | 1                | 0              | 1.473553                | -3.296004 | -0.067086 |
| 14               | 1                | 0              | -0.039841               | -3.936516 | 0.605754  |
| 15               | 6                | 0              | 0.927076                | -1.188639 | 1.123058  |
| 16               | 1                | 0              | 0.407243                | -0.352243 | 1.593575  |
| 17               | 1                | 0              | 1.141442                | -1.912660 | 1.920847  |
| 18               | 7                | 0              | -0.002217               | -1.844897 | 0.190092  |
| 19               | 6                | 0              | -0.712038               | 0.980338  | -0.165179 |
| 20               | 6                | 0              | -0.850649               | 2.370257  | -0.123822 |
| 21               | 1                | 0              | 0.279080                | 0.670985  | -0.479525 |
| 22               | 6                | 0              | -1.987603               | 3.106627  | 0.317136  |
| 23               | 7                | 0              | -2.877262               | 3.769498  | 0.680829  |
| 24               | 6                | 0              | 0.253875                | 3.177876  | -0.526813 |
| 25               | 7                | 0              | 1.154822                | 3.843227  | -0.856049 |
| 26               | 1                | 0              | -2.310566               | -3.210796 | 0.336965  |
| 27               | 1                | 0              | -3.709164               | -1.443467 | -1.727340 |
| 28               | 1                | 0              | -5.096499               | -0.576033 | 0.222630  |
| 29               | 1                | 0              | -3.234447               | 0.938057  | 1.112566  |
| 30               | 6                | 0              | 2.246568                | -0.725645 | 0.523291  |
| 31               | 6                | 0              | 3.264194                | -0.310733 | 1.394898  |
| 32               | 6                | 0              | 2.482513                | -0.689476 | -0.855082 |
| 33               | 6                | 0              | 4.484830                | 0.141186  | 0.897798  |
| 34               | 1                | 0              | 3.097034                | -0.339894 | 2.468878  |
| 35               | 6                | 0              | 3.708960                | -0.240008 | -1.354678 |
| 36               | 1                | 0              | 1.708823                | -1.016189 | -1.543620 |
| 37               | 6                | 0              | 4.711950                | 0.177514  | -0.481506 |
| 38               | 1                | 0              | 5.260679                | 0.462808  | 1.586189  |
| 39               | 1                | 0              | 3.875170                | -0.218751 | -2.427547 |
| 40               | 1                | 0              | 5.663932                | 0.527323  | -0.868947 |

931aa\_model1B\_chexene\_Me\_CN2\_b3lyp631dp\_PCMdmsol.log

Standard orientation:

| Center<br>Number | Atomic<br>Number | Atomic<br>Type | Coordinates (Angstroms) |           |          |
|------------------|------------------|----------------|-------------------------|-----------|----------|
|                  |                  |                | X                       | Y         | Z        |
| 1                | 6                | 0              | -4.054191               | -0.891202 | 0.323180 |
| 2                | 6                | 0              | -3.122476               | 0.319541  | 0.227789 |
| 3                | 6                | 0              | -1.653010               | -0.039586 | 0.038740 |

|    |   |   |           |           |           |
|----|---|---|-----------|-----------|-----------|
| 4  | 6 | 0 | -1.261339 | -1.395771 | -0.059432 |
| 5  | 6 | 0 | -2.272117 | -2.446925 | -0.476714 |
| 6  | 6 | 0 | -3.674589 | -1.900679 | -0.755733 |
| 7  | 1 | 0 | -3.967355 | -1.362279 | 1.311232  |
| 8  | 1 | 0 | -3.444850 | 0.952534  | -0.609667 |
| 9  | 1 | 0 | -1.893813 | -2.961991 | -1.367081 |
| 10 | 1 | 0 | -4.378194 | -2.737865 | -0.795781 |
| 11 | 6 | 0 | 0.372045  | -3.242285 | -0.090032 |
| 12 | 1 | 0 | 0.070291  | -3.528795 | -1.097041 |
| 13 | 1 | 0 | 1.457421  | -3.316014 | -0.031829 |
| 14 | 1 | 0 | -0.066835 | -3.941433 | 0.630697  |
| 15 | 6 | 0 | 0.924008  | -1.193651 | 1.133792  |
| 16 | 1 | 0 | 0.406069  | -0.357254 | 1.606327  |
| 17 | 1 | 0 | 1.143193  | -1.916860 | 1.930266  |
| 18 | 7 | 0 | -0.010626 | -1.853173 | 0.208152  |
| 19 | 6 | 0 | -0.705249 | 0.978477  | -0.157430 |
| 20 | 6 | 0 | -0.839975 | 2.371838  | -0.122080 |
| 21 | 1 | 0 | 0.286658  | 0.666232  | -0.465903 |
| 22 | 6 | 0 | -1.974940 | 3.114406  | 0.310028  |
| 23 | 7 | 0 | -2.862618 | 3.784824  | 0.666046  |
| 24 | 6 | 0 | 0.269447  | 3.172534  | -0.521177 |
| 25 | 7 | 0 | 1.175897  | 3.832965  | -0.846948 |
| 26 | 1 | 0 | -2.318948 | -3.211713 | 0.310448  |
| 27 | 1 | 0 | -3.700075 | -1.413777 | -1.738513 |
| 28 | 1 | 0 | -5.092979 | -0.563519 | 0.216167  |
| 29 | 1 | 0 | -3.227624 | 0.936137  | 1.127282  |
| 30 | 6 | 0 | 2.239190  | -0.730577 | 0.524720  |
| 31 | 6 | 0 | 3.257009  | -0.301057 | 1.389332  |
| 32 | 6 | 0 | 2.471589  | -0.708945 | -0.854698 |
| 33 | 6 | 0 | 4.474548  | 0.150639  | 0.884132  |
| 34 | 1 | 0 | 3.092584  | -0.319608 | 2.463893  |
| 35 | 6 | 0 | 3.695011  | -0.259513 | -1.362276 |
| 36 | 1 | 0 | 1.698313  | -1.047167 | -1.538087 |
| 37 | 6 | 0 | 4.698313  | 0.172443  | -0.496252 |
| 38 | 1 | 0 | 5.250844  | 0.482694  | 1.567079  |
| 39 | 1 | 0 | 3.858851  | -0.250864 | -2.435709 |
| 40 | 1 | 0 | 5.648228  | 0.521108  | -0.889867 |

931aa\_model1B\_chexene\_Me\_CN2\_b3lyp631dp\_PCMtol.log

Standard orientation:

| Center<br>Number | Atomic<br>Number | Atomic<br>Type | Coordinates (Angstroms) |           |           |
|------------------|------------------|----------------|-------------------------|-----------|-----------|
|                  |                  |                | X                       | Y         | Z         |
| 1                | 6                | 0              | -4.064459               | -0.918988 | 0.370766  |
| 2                | 6                | 0              | -3.150599               | 0.297749  | 0.207317  |
| 3                | 6                | 0              | -1.681190               | -0.051576 | 0.004186  |
| 4                | 6                | 0              | -1.273517               | -1.389460 | -0.090461 |
| 5                | 6                | 0              | -2.279216               | -2.478121 | -0.417091 |
| 6                | 6                | 0              | -3.699936               | -1.969096 | -0.673727 |
| 7                | 1                | 0              | -3.949439               | -1.348241 | 1.375225  |
| 8                | 1                | 0              | -3.496977               | 0.897082  | -0.645307 |
| 9                | 1                | 0              | -1.927617               | -3.035191 | -1.292954 |
| 10               | 1                | 0              | -4.391496               | -2.817579 | -0.657241 |
| 11               | 6                | 0              | 0.424340                | -3.180581 | -0.236944 |
| 12               | 1                | 0              | 0.092778                | -3.454282 | -1.238935 |
| 13               | 1                | 0              | 1.513703                | -3.223882 | -0.226129 |
| 14               | 1                | 0              | 0.039223                | -3.917031 | 0.480122  |
| 15               | 6                | 0              | 0.929122                | -1.182637 | 1.073849  |
| 16               | 1                | 0              | 0.405488                | -0.347928 | 1.543301  |
| 17               | 1                | 0              | 1.120688                | -1.917946 | 1.869215  |
| 18               | 7                | 0              | 0.017550                | -1.812852 | 0.106246  |
| 19               | 6                | 0              | -0.737141               | 0.986531  | -0.199606 |
| 20               | 6                | 0              | -0.877290               | 2.367118  | -0.132526 |
| 21               | 1                | 0              | 0.245644                | 0.680385  | -0.542810 |
| 22               | 6                | 0              | -2.010612               | 3.088870  | 0.349454  |
| 23               | 7                | 0              | -2.899324               | 3.730252  | 0.748404  |
| 24               | 6                | 0              | 0.215467                | 3.187210  | -0.553460 |
| 25               | 7                | 0              | 1.105199                | 3.857344  | -0.898512 |
| 26               | 1                | 0              | -2.284101               | -3.203296 | 0.409494  |
| 27               | 1                | 0              | -3.763017               | -1.525600 | -1.675343 |
| 28               | 1                | 0              | -5.109611               | -0.608154 | 0.276482  |
| 29               | 1                | 0              | -3.248785               | 0.947638  | 1.082813  |
| 30               | 6                | 0              | 2.266980                | -0.720783 | 0.515756  |

|    |   |   |          |           |           |
|----|---|---|----------|-----------|-----------|
| 31 | 6 | 0 | 3.286759 | -0.388874 | 1.419066  |
| 32 | 6 | 0 | 2.515733 | -0.599886 | -0.855208 |
| 33 | 6 | 0 | 4.520364 | 0.068898  | 0.961661  |
| 34 | 1 | 0 | 3.110641 | -0.485958 | 2.487927  |
| 35 | 6 | 0 | 3.754883 | -0.145225 | -1.315560 |
| 36 | 1 | 0 | 1.740604 | -0.865705 | -1.567980 |
| 37 | 6 | 0 | 4.758794 | 0.192370  | -0.410030 |
| 38 | 1 | 0 | 5.297197 | 0.327690  | 1.674972  |
| 39 | 1 | 0 | 3.929992 | -0.054746 | -2.383358 |
| 40 | 1 | 0 | 5.720210 | 0.548436  | -0.767113 |

931aa\_model1B\_chexene\_Me\_CN2\_b3lyp631dp\_PCMw.log

Standard orientation:

| Center<br>Number | Atomic<br>Number | Atomic<br>Type | Coordinates (Angstroms) |           |           |
|------------------|------------------|----------------|-------------------------|-----------|-----------|
|                  |                  |                | X                       | Y         | Z         |
| 1                | 6                | 0              | -4.054147               | -0.888822 | 0.322875  |
| 2                | 6                | 0              | -3.121498               | 0.321393  | 0.229366  |
| 3                | 6                | 0              | -1.652344               | -0.038682 | 0.039730  |
| 4                | 6                | 0              | -1.261818               | -1.395669 | -0.059148 |
| 5                | 6                | 0              | -2.273299               | -2.445004 | -0.479074 |
| 6                | 6                | 0              | -3.675152               | -1.896896 | -0.757590 |
| 7                | 1                | 0              | -3.967728               | -1.361472 | 1.310193  |
| 8                | 1                | 0              | -3.443350               | 0.955769  | -0.607239 |
| 9                | 1                | 0              | -1.894940               | -2.958521 | -1.370299 |
| 10               | 1                | 0              | -4.379500               | -2.733368 | -0.799109 |
| 11               | 6                | 0              | 0.369122                | -3.244044 | -0.087795 |
| 12               | 1                | 0              | 0.067436                | -3.530499 | -1.094802 |
| 13               | 1                | 0              | 1.454369                | -3.318811 | -0.028933 |
| 14               | 1                | 0              | -0.070932               | -3.942186 | 0.633118  |
| 15               | 6                | 0              | 0.923031                | -1.194895 | 1.134752  |
| 16               | 1                | 0              | 0.405544                | -0.358452 | 1.607704  |
| 17               | 1                | 0              | 1.142561                | -1.918272 | 1.930880  |
| 18               | 7                | 0              | -0.012403               | -1.854351 | 0.209831  |
| 19               | 6                | 0              | -0.703932               | 0.978076  | -0.156377 |
| 20               | 6                | 0              | -0.837463               | 2.371989  | -0.121657 |
| 21               | 1                | 0              | 0.287958                | 0.664997  | -0.463993 |
| 22               | 6                | 0              | -1.971917               | 3.115900  | 0.308913  |
| 23               | 7                | 0              | -2.859200               | 3.787625  | 0.663675  |
| 24               | 6                | 0              | 0.273090                | 3.171216  | -0.519922 |
| 25               | 7                | 0              | 1.180688                | 3.830552  | -0.844995 |
| 26               | 1                | 0              | -2.321143               | -3.211271 | 0.306539  |
| 27               | 1                | 0              | -3.699928               | -1.408413 | -1.739601 |
| 28               | 1                | 0              | -5.092684               | -0.560221 | 0.216203  |
| 29               | 1                | 0              | -3.226011               | 0.936721  | 1.129844  |
| 30               | 6                | 0              | 2.237792                | -0.731914 | 0.524745  |
| 31               | 6                | 0              | 3.255684                | -0.301175 | 1.388704  |
| 32               | 6                | 0              | 2.469816                | -0.711516 | -0.854788 |
| 33               | 6                | 0              | 4.472921                | 0.150538  | 0.882741  |
| 34               | 1                | 0              | 3.091577                | -0.318949 | 2.463305  |
| 35               | 6                | 0              | 3.692939                | -0.262016 | -1.363110 |
| 36               | 1                | 0              | 1.696613                | -1.050764 | -1.537721 |
| 37               | 6                | 0              | 4.696303                | 0.171207  | -0.497754 |
| 38               | 1                | 0              | 5.249306                | 0.483423  | 1.565170  |
| 39               | 1                | 0              | 3.856506                | -0.254451 | -2.436584 |
| 40               | 1                | 0              | 5.645989                | 0.519855  | -0.891922 |

933aa\_model1B\_chexene\_Ph\_CN2\_b3lyp631dp\_PCMacn\_TS\_CH.log

Standard orientation:

| Center<br>Number | Atomic<br>Number | Atomic<br>Type | Coordinates (Angstroms) |           |           |
|------------------|------------------|----------------|-------------------------|-----------|-----------|
|                  |                  |                | X                       | Y         | Z         |
| 1                | 6                | 0              | -1.728933               | -2.212335 | -2.083878 |
| 2                | 6                | 0              | -1.786023               | -0.728856 | -1.703403 |
| 3                | 6                | 0              | -0.959709               | -0.402379 | -0.469417 |
| 4                | 6                | 0              | -0.571250               | -1.374343 | 0.390775  |
| 5                | 6                | 0              | -0.870154               | -2.842749 | 0.196483  |
| 6                | 6                | 0              | -1.962939               | -3.088361 | -0.851307 |
| 7                | 1                | 0              | -2.475842               | -2.419929 | -2.857239 |
| 8                | 1                | 0              | -1.444632               | -0.102189 | -2.536130 |

|    |   |   |           |           |           |
|----|---|---|-----------|-----------|-----------|
| 9  | 1 | 0 | 0.060249  | -3.342638 | -0.109326 |
| 10 | 1 | 0 | -2.943820 | -2.853578 | -0.418847 |
| 11 | 6 | 0 | -0.544274 | -1.225666 | 2.859235  |
| 12 | 1 | 0 | -1.385092 | -0.530099 | 2.969564  |
| 13 | 1 | 0 | -0.925151 | -2.244731 | 2.907890  |
| 14 | 1 | 0 | 0.162118  | -1.084610 | 3.677561  |
| 15 | 6 | 0 | 0.954725  | 0.090685  | 1.485194  |
| 16 | 1 | 0 | 0.044214  | 1.018380  | 0.781870  |
| 17 | 1 | 0 | 1.045660  | 0.658448  | 2.411250  |
| 18 | 7 | 0 | 0.151292  | -1.015064 | 1.575511  |
| 19 | 6 | 0 | -0.647403 | 1.048181  | -0.254042 |
| 20 | 6 | 0 | -1.747260 | 1.987248  | -0.170041 |
| 21 | 1 | 0 | 0.156696  | 1.405050  | -0.908318 |
| 22 | 6 | 0 | -2.976169 | 1.618694  | 0.417082  |
| 23 | 7 | 0 | -3.990853 | 1.292671  | 0.903288  |
| 24 | 6 | 0 | -1.570735 | 3.336220  | -0.545411 |
| 25 | 7 | 0 | -1.413364 | 4.451595  | -0.866167 |
| 26 | 1 | 0 | -1.150952 | -3.304756 | 1.148078  |
| 27 | 1 | 0 | -1.978836 | -4.149307 | -1.120373 |
| 28 | 1 | 0 | -0.747533 | -2.444854 | -2.517032 |
| 29 | 1 | 0 | -2.827536 | -0.436644 | -1.515759 |
| 30 | 6 | 0 | 2.146370  | 0.138584  | 0.609336  |
| 31 | 6 | 0 | 2.868969  | 1.343010  | 0.532696  |
| 32 | 6 | 0 | 2.601303  | -0.977467 | -0.112234 |
| 33 | 6 | 0 | 4.014250  | 1.431541  | -0.254695 |
| 34 | 1 | 0 | 2.528603  | 2.209952  | 1.092727  |
| 35 | 6 | 0 | 3.750159  | -0.885569 | -0.894779 |
| 36 | 1 | 0 | 2.073334  | -1.920992 | -0.037026 |
| 37 | 6 | 0 | 4.456827  | 0.317636  | -0.973066 |
| 38 | 1 | 0 | 4.562670  | 2.366850  | -0.304619 |
| 39 | 1 | 0 | 4.098362  | -1.757578 | -1.439548 |
| 40 | 1 | 0 | 5.351432  | 0.384368  | -1.584330 |

933aa\_model1B\_chexene\_Ph\_CN2\_b3lyp631dp\_PCMdce\_TS\_CH.log

Standard orientation:

| Center<br>Number | Atomic<br>Number | Atomic<br>Type | Coordinates (Angstroms) |           |           |
|------------------|------------------|----------------|-------------------------|-----------|-----------|
|                  |                  |                | X                       | Y         | Z         |
| 1                | 6                | 0              | -1.694323               | -2.236688 | -2.081866 |
| 2                | 6                | 0              | -1.763755               | -0.749939 | -1.716231 |
| 3                | 6                | 0              | -0.951419               | -0.406412 | -0.478117 |
| 4                | 6                | 0              | -0.563102               | -1.367535 | 0.393007  |
| 5                | 6                | 0              | -0.850037               | -2.839814 | 0.211596  |
| 6                | 6                | 0              | -1.932626               | -3.102599 | -0.842795 |
| 7                | 1                | 0              | -2.433691               | -2.456762 | -2.858980 |
| 8                | 1                | 0              | -1.418786               | -0.128983 | -2.551822 |
| 9                | 1                | 0              | 0.085833                | -3.337932 | -0.080641 |
| 10               | 1                | 0              | -2.918248               | -2.869644 | -0.420475 |
| 11               | 6                | 0              | -0.568745               | -1.178217 | 2.857463  |
| 12               | 1                | 0              | -1.411615               | -0.481339 | 2.941212  |
| 13               | 1                | 0              | -0.951109               | -2.196271 | 2.917597  |
| 14               | 1                | 0              | 0.123963                | -1.022953 | 3.685070  |
| 15               | 6                | 0              | 0.954832                | 0.109734  | 1.485122  |
| 16               | 1                | 0              | 0.036350                | 1.038539  | 0.756417  |
| 17               | 1                | 0              | 1.036219                | 0.691818  | 2.403023  |
| 18               | 7                | 0              | 0.147615                | -0.991240 | 1.581670  |
| 19               | 6                | 0              | -0.654958               | 1.049918  | -0.270433 |
| 20               | 6                | 0              | -1.770034               | 1.972174  | -0.184526 |
| 21               | 1                | 0              | 0.135116                | 1.412739  | -0.938588 |
| 22               | 6                | 0              | -2.982967               | 1.586266  | 0.424535  |
| 23               | 7                | 0              | -3.980412               | 1.240863  | 0.932412  |
| 24               | 6                | 0              | -1.618196               | 3.320170  | -0.574266 |
| 25               | 7                | 0              | -1.477443               | 4.434005  | -0.907352 |
| 26               | 1                | 0              | -1.136370               | -3.293237 | 1.165909  |
| 27               | 1                | 0              | -1.939987               | -4.166168 | -1.101913 |
| 28               | 1                | 0              | -0.708131               | -2.467239 | -2.505344 |
| 29               | 1                | 0              | -2.808298               | -0.461686 | -1.540337 |
| 30               | 6                | 0              | 2.148332                | 0.153386  | 0.614452  |
| 31               | 6                | 0              | 2.873184                | 1.356786  | 0.539174  |
| 32               | 6                | 0              | 2.604651                | -0.963760 | -0.105029 |
| 33               | 6                | 0              | 4.020966                | 1.443455  | -0.244337 |
| 34               | 1                | 0              | 2.531623                | 2.224873  | 1.096764  |
| 35               | 6                | 0              | 3.756286                | -0.873760 | -0.883352 |

|    |   |   |          |           |           |
|----|---|---|----------|-----------|-----------|
| 36 | 1 | 0 | 2.075255 | -1.906588 | -0.031326 |
| 37 | 6 | 0 | 4.464654 | 0.328499  | -0.960272 |
| 38 | 1 | 0 | 4.570327 | 2.378242  | -0.293439 |
| 39 | 1 | 0 | 4.105487 | -1.746545 | -1.426285 |
| 40 | 1 | 0 | 5.361285 | 0.393753  | -1.568709 |

933aa\_model1B\_chexene\_Ph\_CN2\_b3lyp631dp\_PCMDmso\_TS\_CH\_f.log

Standard orientation:

| Center Number | Atomic Number | Atomic Type | Coordinates (Angstroms) |           |           |
|---------------|---------------|-------------|-------------------------|-----------|-----------|
|               |               |             | X                       | Y         | Z         |
| 1             | 6             | 0           | -1.735771               | -2.207912 | -2.083890 |
| 2             | 6             | 0           | -1.789545               | -0.724798 | -1.701526 |
| 3             | 6             | 0           | -0.961139               | -0.401297 | -0.468099 |
| 4             | 6             | 0           | -0.573247               | -1.375066 | 0.390506  |
| 5             | 6             | 0           | -0.874938               | -2.842696 | 0.194362  |
| 6             | 6             | 0           | -1.969728               | -3.084953 | -0.852075 |
| 7             | 1             | 0           | -2.484158               | -2.413112 | -2.856465 |
| 8             | 1             | 0           | -1.447864               | -0.097824 | -2.533902 |
| 9             | 1             | 0           | 0.054194                | -3.343507 | -0.113754 |
| 10            | 1             | 0           | -2.949557               | -2.848844 | -0.417929 |
| 11            | 6             | 0           | -0.540719               | -1.232914 | 2.859563  |
| 12            | 1             | 0           | -1.380878               | -0.537290 | 2.974365  |
| 13            | 1             | 0           | -0.921809               | -2.251964 | 2.906380  |
| 14            | 1             | 0           | 0.168053                | -1.094533 | 3.676261  |
| 15            | 6             | 0           | 0.955251                | 0.086859  | 1.485347  |
| 16            | 1             | 0           | 0.045795                | 1.015649  | 0.785307  |
| 17            | 1             | 0           | 1.047913                | 0.652442  | 2.412571  |
| 18            | 7             | 0           | 0.151371                | -1.018793 | 1.574539  |
| 19            | 6             | 0           | -0.645741               | 1.048273  | -0.251644 |
| 20            | 6             | 0           | -1.742965               | 1.990286  | -0.167909 |
| 21            | 1             | 0           | 0.160323                | 1.403778  | -0.904215 |
| 22            | 6             | 0           | -2.974109               | 1.624951  | 0.416493  |
| 23            | 7             | 0           | -3.991061               | 1.302090  | 0.900082  |
| 24            | 6             | 0           | -1.562262               | 3.339156  | -0.541633 |
| 25            | 7             | 0           | -1.401784               | 4.454500  | -0.861006 |
| 26            | 1             | 0           | -1.154963               | -3.305788 | 1.145614  |
| 27            | 1             | 0           | -1.987996               | -4.145538 | -1.122385 |
| 28            | 1             | 0           | -0.755422               | -2.441789 | -2.518661 |
| 29            | 1             | 0           | -2.830318               | -0.430852 | -1.512435 |
| 30            | 6             | 0           | 2.146348                | 0.135100  | 0.608575  |
| 31            | 6             | 0           | 2.870241                | 1.338845  | 0.533742  |
| 32            | 6             | 0           | 2.599346                | -0.980044 | -0.115571 |
| 33            | 6             | 0           | 4.015004                | 1.427594  | -0.254411 |
| 34            | 1             | 0           | 2.531383                | 2.205042  | 1.095831  |
| 35            | 6             | 0           | 3.747685                | -0.887950 | -0.898872 |
| 36            | 1             | 0           | 2.070329                | -1.923104 | -0.041841 |
| 37            | 6             | 0           | 4.455703                | 0.314589  | -0.975345 |
| 38            | 1             | 0           | 4.564508                | 2.362343  | -0.302879 |
| 39            | 1             | 0           | 4.094397                | -1.759294 | -1.445648 |
| 40            | 1             | 0           | 5.349903                | 0.381472  | -1.587185 |

933aa\_model1B\_chexene\_Ph\_CN2\_b3lyp631dp\_PCMTol\_TS\_CH.log

Standard orientation:

| Center Number | Atomic Number | Atomic Type | Coordinates (Angstroms) |           |           |
|---------------|---------------|-------------|-------------------------|-----------|-----------|
|               |               |             | X                       | Y         | Z         |
| 1             | 6             | 0           | -1.512569               | -2.404308 | -2.041492 |
| 2             | 6             | 0           | -1.645322               | -0.897928 | -1.789047 |
| 3             | 6             | 0           | -0.906857               | -0.438446 | -0.544016 |
| 4             | 6             | 0           | -0.513094               | -1.320256 | 0.399974  |
| 5             | 6             | 0           | -0.731558               | -2.812107 | 0.317088  |
| 6             | 6             | 0           | -1.765884               | -3.189214 | -0.751619 |
| 7             | 1             | 0           | -2.214476               | -2.707628 | -2.825297 |
| 8             | 1             | 0           | -1.280524               | -0.327897 | -2.652406 |
| 9             | 1             | 0           | 0.231300                | -3.295847 | 0.094943  |
| 10            | 1             | 0           | -2.772621               | -2.961601 | -0.379680 |
| 11            | 6             | 0           | -0.697409               | -0.882592 | 2.817199  |
| 12            | 1             | 0           | -1.561540               | -0.209501 | 2.745253  |
| 13            | 1             | 0           | -1.063581               | -1.899159 | 2.960334  |



|    |   |   |           |           |           |
|----|---|---|-----------|-----------|-----------|
| 14 | 1 | 0 | -0.083621 | -0.615828 | 3.678725  |
| 15 | 6 | 0 | 0.936514  | 0.263265  | 1.446379  |
| 16 | 1 | 0 | 0.009976  | 1.140908  | 0.571773  |
| 17 | 1 | 0 | 0.958738  | 0.931274  | 2.307022  |
| 18 | 7 | 0 | 0.125395  | -0.825706 | 1.594431  |
| 19 | 6 | 0 | -0.710287 | 1.047389  | -0.404131 |
| 20 | 6 | 0 | -1.905045 | 1.862646  | -0.271589 |
| 21 | 1 | 0 | -0.016087 | 1.443365  | -1.154304 |
| 22 | 6 | 0 | -2.987744 | 1.392261  | 0.501483  |
| 23 | 7 | 0 | -3.849203 | 0.957482  | 1.165756  |
| 24 | 6 | 0 | -1.926833 | 3.191961  | -0.746711 |
| 25 | 7 | 0 | -1.921003 | 4.288680  | -1.155327 |
| 26 | 1 | 0 | -1.035795 | -3.204895 | 1.293440  |
| 27 | 1 | 0 | -1.729296 | -4.268065 | -0.934678 |
| 28 | 1 | 0 | -0.504367 | -2.629188 | -2.413785 |
| 29 | 1 | 0 | -2.704218 | -0.630295 | -1.681133 |
| 30 | 6 | 0 | 2.158567  | 0.265989  | 0.624120  |
| 31 | 6 | 0 | 2.887294  | 1.466442  | 0.526617  |
| 32 | 6 | 0 | 2.642342  | -0.877377 | -0.035215 |
| 33 | 6 | 0 | 4.060782  | 1.525187  | -0.218909 |
| 34 | 1 | 0 | 2.524989  | 2.355901  | 1.035598  |
| 35 | 6 | 0 | 3.820087  | -0.815031 | -0.775336 |
| 36 | 1 | 0 | 2.111219  | -1.817538 | 0.055206  |
| 37 | 6 | 0 | 4.529992  | 0.384384  | -0.875236 |
| 38 | 1 | 0 | 4.610229  | 2.458870  | -0.285838 |
| 39 | 1 | 0 | 4.188771  | -1.707548 | -1.271536 |
| 40 | 1 | 0 | 5.446719  | 0.427891  | -1.455014 |

933aa\_model1B\_chexene\_Ph\_CN2\_b3lyp631dp\_PCMw\_TS\_CH.log

Standard orientation:

| Center<br>Number | Atomic<br>Number | Atomic<br>Type | Coordinates (Angstroms) |           |           |
|------------------|------------------|----------------|-------------------------|-----------|-----------|
|                  |                  |                | X                       | Y         | Z         |
| 1                | 6                | 0              | -1.978878               | -1.974783 | -2.107924 |
| 2                | 6                | 0              | -1.911399               | -0.516349 | -1.643882 |
| 3                | 6                | 0              | -1.008992               | -0.325727 | -0.435174 |
| 4                | 6                | 0              | -0.673770               | -1.377298 | 0.358337  |
| 5                | 6                | 0              | -1.139822               | -2.796023 | 0.121723  |
| 6                | 6                | 0              | -2.264148               | -2.891859 | -0.917663 |
| 7                | 1                | 0              | -2.753575               | -2.079447 | -2.874720 |
| 8                | 1                | 0              | -1.557997               | 0.133322  | -2.453741 |
| 9                | 1                | 0              | -0.273586               | -3.389863 | -0.203793 |
| 10               | 1                | 0              | -3.215255               | -2.598501 | -0.455570 |
| 11               | 6                | 0              | -0.389898               | -1.649001 | 2.809372  |
| 12               | 1                | 0              | -1.461087               | -1.452890 | 2.910008  |
| 13               | 1                | 0              | -0.206962               | -2.721593 | 2.906447  |
| 14               | 1                | 0              | 0.145653                | -1.142965 | 3.612541  |
| 15               | 6                | 0              | 0.980143                | -0.093144 | 1.499528  |
| 16               | 1                | 0              | 0.101958                | 0.932475  | 0.893189  |
| 17               | 1                | 0              | 1.143312                | 0.368324  | 2.472955  |
| 18               | 7                | 0              | 0.119668                | -1.158669 | 1.515675  |
| 19               | 6                | 0              | -0.563978               | 1.074997  | -0.155246 |
| 20               | 6                | 0              | -1.564282               | 2.119574  | -0.065910 |
| 21               | 1                | 0              | 0.296113                | 1.377316  | -0.764612 |
| 22               | 6                | 0              | -2.853745               | 1.865386  | 0.446966  |
| 23               | 7                | 0              | -3.924728               | 1.639440  | 0.864569  |
| 24               | 6                | 0              | -1.231639               | 3.456258  | -0.373509 |
| 25               | 7                | 0              | -0.944892               | 4.561185  | -0.636099 |
| 26               | 1                | 0              | -1.467750               | -3.244700 | 1.064713  |
| 27               | 1                | 0              | -2.374326               | -3.932689 | -1.238088 |
| 28               | 1                | 0              | -1.026656               | -2.260335 | -2.573405 |
| 29               | 1                | 0              | -2.921823               | -0.165139 | -1.396926 |
| 30               | 6                | 0              | 2.142039                | -0.022014 | 0.582822  |
| 31               | 6                | 0              | 2.937056                | 1.137992  | 0.603586  |
| 32               | 6                | 0              | 2.498442                | -1.078242 | -0.271477 |
| 33               | 6                | 0              | 4.059468                | 1.241024  | -0.214754 |
| 34               | 1                | 0              | 2.672224                | 1.958479  | 1.265102  |
| 35               | 6                | 0              | 3.624219                | -0.972493 | -1.085434 |
| 36               | 1                | 0              | 1.910531                | -1.988979 | -0.278671 |
| 37               | 6                | 0              | 4.405213                | 0.186351  | -1.063649 |
| 38               | 1                | 0              | 4.665273                | 2.141229  | -0.187276 |
| 39               | 1                | 0              | 3.895954                | -1.799698 | -1.733767 |
| 40               | 1                | 0              | 5.281483                | 0.264070  | -1.699670 |

933aa\_model1B\_chexene\_Ph\_CN2\_b3lyp631dp\_TS\_CH\_f2.log

Standard orientation:

| Center<br>Number | Atomic<br>Number | Atomic<br>Type | Coordinates (Angstroms) |           |           |
|------------------|------------------|----------------|-------------------------|-----------|-----------|
|                  |                  |                | X                       | Y         | Z         |
| 1                | 6                | 0              | -1.413250               | -2.481508 | -2.011557 |
| 2                | 6                | 0              | -1.571351               | -0.967587 | -1.827254 |
| 3                | 6                | 0              | -0.881694               | -0.444972 | -0.580089 |
| 4                | 6                | 0              | -0.495216               | -1.281180 | 0.405676  |
| 5                | 6                | 0              | -0.688421               | -2.778758 | 0.380694  |
| 6                | 6                | 0              | -1.691274               | -3.214000 | -0.695982 |
| 7                | 1                | 0              | -2.088989               | -2.828765 | -2.800264 |
| 8                | 1                | 0              | -1.184494               | -0.430594 | -2.702622 |
| 9                | 1                | 0              | 0.285294                | -3.261010 | 0.205212  |
| 10               | 1                | 0              | -2.708847               | -2.980598 | -0.358794 |
| 11               | 6                | 0              | -0.737696               | -0.742857 | 2.800332  |
| 12               | 1                | 0              | -1.614413               | -0.092222 | 2.681036  |
| 13               | 1                | 0              | -1.088909               | -1.759210 | 2.981798  |
| 14               | 1                | 0              | -0.144632               | -0.429630 | 3.661401  |
| 15               | 6                | 0              | 0.941603                | 0.339175  | 1.428960  |
| 16               | 1                | 0              | -0.008549               | 1.213513  | 0.450805  |
| 17               | 1                | 0              | 0.939112                | 1.048278  | 2.255832  |
| 18               | 7                | 0              | 0.110762                | -0.728925 | 1.594560  |
| 19               | 6                | 0              | -0.743632               | 1.053917  | -0.478135 |
| 20               | 6                | 0              | -1.984300               | 1.797268  | -0.304331 |
| 21               | 1                | 0              | -0.129584               | 1.463017  | -1.288355 |
| 22               | 6                | 0              | -2.964211               | 1.286743  | 0.572160  |
| 23               | 7                | 0              | -3.712489               | 0.802227  | 1.332617  |
| 24               | 6                | 0              | -2.127970               | 3.096460  | -0.839191 |
| 25               | 7                | 0              | -2.216387               | 4.166741  | -1.302653 |
| 26               | 1                | 0              | -1.013851               | -3.133411 | 1.365156  |
| 27               | 1                | 0              | -1.640326               | -4.299461 | -0.831605 |
| 28               | 1                | 0              | -0.392471               | -2.708927 | -2.346953 |
| 29               | 1                | 0              | -2.635698               | -0.707333 | -1.766126 |
| 30               | 6                | 0              | 2.167827                | 0.323034  | 0.623489  |
| 31               | 6                | 0              | 2.918174                | 1.512552  | 0.541258  |
| 32               | 6                | 0              | 2.643621                | -0.821782 | -0.041700 |
| 33               | 6                | 0              | 4.099446                | 1.559874  | -0.191053 |
| 34               | 1                | 0              | 2.562924                | 2.404028  | 1.051882  |
| 35               | 6                | 0              | 3.829305                | -0.770620 | -0.768766 |
| 36               | 1                | 0              | 2.097032                | -1.754191 | 0.032928  |
| 37               | 6                | 0              | 4.558880                | 0.417977  | -0.852269 |
| 38               | 1                | 0              | 4.663017                | 2.486103  | -0.244748 |
| 39               | 1                | 0              | 4.189404                | -1.664695 | -1.268806 |
| 40               | 1                | 0              | 5.481731                | 0.452391  | -1.422901 |

933ba\_model1B\_chexene\_Ph\_CN2\_b3lyp631dp\_PCMdmsO\_TS\_CH.log

Standard orientation:

| Center<br>Number | Atomic<br>Number | Atomic<br>Type | Coordinates (Angstroms) |           |           |
|------------------|------------------|----------------|-------------------------|-----------|-----------|
|                  |                  |                | X                       | Y         | Z         |
| 1                | 6                | 0              | -2.867805               | -2.650422 | 0.111740  |
| 2                | 6                | 0              | -2.457885               | -1.398550 | 0.900262  |
| 3                | 6                | 0              | -1.510101               | -0.569237 | 0.051300  |
| 4                | 6                | 0              | -0.391280               | -1.241117 | -0.481941 |
| 5                | 6                | 0              | -0.321115               | -2.753475 | -0.397013 |
| 6                | 6                | 0              | -1.649146               | -3.532493 | -0.198887 |
| 7                | 1                | 0              | -3.611761               | -3.229655 | 0.669372  |
| 8                | 1                | 0              | -3.343822               | -0.822345 | 1.163277  |
| 9                | 1                | 0              | 0.202764                | -3.146862 | -1.268967 |
| 10               | 1                | 0              | -1.498603               | -4.239886 | 0.622568  |
| 11               | 6                | 0              | 1.629527                | -1.290840 | -1.902325 |
| 12               | 1                | 0              | 1.078822                | -1.878673 | -2.636964 |
| 13               | 1                | 0              | 2.198218                | -0.530338 | -2.438378 |
| 14               | 1                | 0              | 2.336308                | -1.936481 | -1.372596 |
| 15               | 6                | 0              | 1.174670                | 0.718259  | -0.523711 |
| 16               | 1                | 0              | 0.495780                | 1.056101  | 0.258645  |
| 17               | 1                | 0              | 1.123661                | 1.441212  | -1.344565 |
| 18               | 7                | 0              | 0.698110                | -0.607170 | -0.990742 |

|    |   |   |           |           |           |
|----|---|---|-----------|-----------|-----------|
| 19 | 6 | 0 | -1.814010 | 0.729587  | -0.390280 |
| 20 | 6 | 0 | -2.800927 | 1.639988  | 0.007878  |
| 21 | 1 | 0 | -1.229096 | 1.088271  | -1.232286 |
| 22 | 6 | 0 | -3.636049 | 1.530133  | 1.153822  |
| 23 | 7 | 0 | -4.328566 | 1.498430  | 2.094041  |
| 24 | 6 | 0 | -2.973507 | 2.835843  | -0.746172 |
| 25 | 7 | 0 | -3.116021 | 3.817397  | -1.362903 |
| 26 | 1 | 0 | 0.353654  | -2.959295 | 0.446821  |
| 27 | 1 | 0 | -1.850635 | -4.137402 | -1.088044 |
| 28 | 1 | 0 | -3.349260 | -2.325265 | -0.817756 |
| 29 | 1 | 0 | -1.985344 | -1.692127 | 1.847610  |
| 30 | 6 | 0 | 2.590644  | 0.664631  | 0.022539  |
| 31 | 6 | 0 | 3.610367  | 1.417485  | -0.570297 |
| 32 | 6 | 0 | 2.888647  | -0.112895 | 1.151356  |
| 33 | 6 | 0 | 4.905798  | 1.397799  | -0.047101 |
| 34 | 1 | 0 | 3.389277  | 2.025179  | -1.443965 |
| 35 | 6 | 0 | 4.181889  | -0.138866 | 1.671715  |
| 36 | 1 | 0 | 2.104521  | -0.697636 | 1.625197  |
| 37 | 6 | 0 | 5.194225  | 0.617745  | 1.073298  |
| 38 | 1 | 0 | 5.686554  | 1.988631  | -0.516656 |
| 39 | 1 | 0 | 4.399946  | -0.744458 | 2.546348  |
| 40 | 1 | 0 | 6.200693  | 0.598986  | 1.480453  |

951aa\_model1C\_chexane\_Ph\_CN2\_b3lyp631dp.log

Standard orientation:

| Center<br>Number | Atomic<br>Number | Atomic<br>Type | Coordinates (Angstroms) |           |           |
|------------------|------------------|----------------|-------------------------|-----------|-----------|
|                  |                  |                | X                       | Y         | Z         |
| 1                | 6                | 0              | -4.051087               | -1.148477 | 0.720565  |
| 2                | 6                | 0              | -3.473751               | 0.095654  | 0.030168  |
| 3                | 6                | 0              | -1.919347               | 0.073604  | 0.042065  |
| 4                | 6                | 0              | -1.396142               | -1.224934 | -0.616993 |
| 5                | 6                | 0              | -1.972409               | -2.463741 | 0.100409  |
| 6                | 6                | 0              | -3.509085               | -2.443588 | 0.101761  |
| 7                | 1                | 0              | -3.794673               | -1.118302 | 1.788166  |
| 8                | 1                | 0              | -3.825151               | 0.138886  | -1.009878 |
| 9                | 1                | 0              | -1.607215               | -3.376091 | -0.384299 |
| 10               | 1                | 0              | -3.896442               | -3.313691 | 0.643686  |
| 11               | 6                | 0              | 0.552623                | -2.062509 | -1.837798 |
| 12               | 1                | 0              | 0.018825                | -1.851184 | -2.769430 |
| 13               | 1                | 0              | 1.615469                | -1.875373 | -2.006634 |
| 14               | 1                | 0              | 0.433474                | -3.136341 | -1.608478 |
| 15               | 6                | 0              | 0.841551                | -1.336520 | 0.457862  |
| 16               | 1                | 0              | 0.348172                | -0.752843 | 1.243904  |
| 17               | 1                | 0              | 0.849113                | -2.383281 | 0.810759  |
| 18               | 7                | 0              | 0.068538                | -1.178065 | -0.779715 |
| 19               | 6                | 0              | -1.369600               | 1.268104  | -0.671218 |
| 20               | 6                | 0              | -0.991953               | 2.433419  | -0.089379 |
| 21               | 1                | 0              | -1.307647               | 1.214061  | -1.755421 |
| 22               | 6                | 0              | -1.035245               | 2.619617  | 1.334929  |
| 23               | 7                | 0              | -1.080916               | 2.756232  | 2.489047  |
| 24               | 6                | 0              | -0.528408               | 3.541337  | -0.876880 |
| 25               | 7                | 0              | -0.153424               | 4.432311  | -1.523330 |
| 26               | 1                | 0              | -1.609408               | -2.489784 | 1.136253  |
| 27               | 1                | 0              | -3.874049               | -2.533340 | -0.931090 |
| 28               | 1                | 0              | -5.145118               | -1.124471 | 0.661634  |
| 29               | 1                | 0              | -3.827540               | 1.007418  | 0.522466  |
| 30               | 1                | 0              | -1.605752               | 0.109542  | 1.092687  |
| 31               | 1                | 0              | -1.795680               | -1.228436 | -1.642171 |
| 32               | 6                | 0              | 2.278272                | -0.857429 | 0.331697  |
| 33               | 6                | 0              | 3.320956                | -1.603857 | 0.891226  |
| 34               | 6                | 0              | 2.582893                | 0.355165  | -0.300857 |
| 35               | 6                | 0              | 4.639179                | -1.147449 | 0.832213  |
| 36               | 1                | 0              | 3.099422                | -2.550575 | 1.378424  |
| 37               | 6                | 0              | 3.898816                | 0.810808  | -0.366633 |
| 38               | 1                | 0              | 1.780798                | 0.931374  | -0.750427 |
| 39               | 6                | 0              | 4.931701                | 0.062090  | 0.202459  |
| 40               | 1                | 0              | 5.435815                | -1.740213 | 1.272639  |
| 41               | 1                | 0              | 4.118030                | 1.753094  | -0.860578 |
| 42               | 1                | 0              | 5.956400                | 0.418449  | 0.152194  |

951aa\_model1C\_chexane\_Ph\_CN2\_b3lyp631dp\_PCMacn.log

Standard orientation:

| Center<br>Number | Atomic<br>Number | Atomic<br>Type | Coordinates (Angstroms) |           |           |
|------------------|------------------|----------------|-------------------------|-----------|-----------|
|                  |                  |                | X                       | Y         | Z         |
| 1                | 6                | 0              | -4.042260               | -1.124464 | 0.796971  |
| 2                | 6                | 0              | -3.476984               | 0.128269  | 0.112322  |
| 3                | 6                | 0              | -1.921324               | 0.091046  | 0.077667  |
| 4                | 6                | 0              | -1.429604               | -1.201549 | -0.616920 |
| 5                | 6                | 0              | -1.998739               | -2.448404 | 0.089747  |
| 6                | 6                | 0              | -3.534372               | -2.411076 | 0.133843  |
| 7                | 1                | 0              | -3.751051               | -1.119361 | 1.855952  |
| 8                | 1                | 0              | -3.857134               | 0.192416  | -0.915483 |
| 9                | 1                | 0              | -1.657971               | -3.352397 | -0.426936 |
| 10               | 1                | 0              | -3.914898               | -3.288198 | 0.669089  |
| 11               | 6                | 0              | 0.483435                | -2.015585 | -1.908835 |
| 12               | 1                | 0              | -0.063245               | -1.759121 | -2.820816 |
| 13               | 1                | 0              | 1.547132                | -1.843135 | -2.090920 |
| 14               | 1                | 0              | 0.347191                | -3.093535 | -1.715493 |
| 15               | 6                | 0              | 0.823659                | -1.394468 | 0.408423  |
| 16               | 1                | 0              | 0.340212                | -0.862400 | 1.235814  |
| 17               | 1                | 0              | 0.836662                | -2.459815 | 0.696507  |
| 18               | 7                | 0              | 0.035513                | -1.162199 | -0.807723 |
| 19               | 6                | 0              | -1.396623               | 1.284001  | -0.650780 |
| 20               | 6                | 0              | -0.955226               | 2.436855  | -0.084353 |
| 21               | 1                | 0              | -1.421717               | 1.247785  | -1.737171 |
| 22               | 6                | 0              | -0.877034               | 2.616960  | 1.338036  |
| 23               | 7                | 0              | -0.811297               | 2.770914  | 2.489162  |
| 24               | 6                | 0              | -0.538230               | 3.549414  | -0.889369 |
| 25               | 7                | 0              | -0.199631               | 4.452305  | -1.539911 |
| 26               | 1                | 0              | -1.609089               | -2.502303 | 1.114470  |
| 27               | 1                | 0              | -3.929047               | -2.473004 | -0.889643 |
| 28               | 1                | 0              | -5.137121               | -1.086831 | 0.771316  |
| 29               | 1                | 0              | -3.807216               | 1.033533  | 0.631816  |
| 30               | 1                | 0              | -1.571318               | 0.114682  | 1.116782  |
| 31               | 1                | 0              | -1.849725               | -1.180471 | -1.632165 |
| 32               | 6                | 0              | 2.258856                | -0.904864 | 0.298975  |
| 33               | 6                | 0              | 3.302753                | -1.660201 | 0.847094  |
| 34               | 6                | 0              | 2.563378                | 0.325245  | -0.300267 |
| 35               | 6                | 0              | 4.619943                | -1.195981 | 0.809452  |
| 36               | 1                | 0              | 3.082820                | -2.620413 | 1.307481  |
| 37               | 6                | 0              | 3.878480                | 0.789331  | -0.345154 |
| 38               | 1                | 0              | 1.760853                | 0.908056  | -0.740428 |
| 39               | 6                | 0              | 4.912127                | 0.031560  | 0.212557  |
| 40               | 1                | 0              | 5.416213                | -1.796664 | 1.239793  |
| 41               | 1                | 0              | 4.097297                | 1.744180  | -0.815039 |
| 42               | 1                | 0              | 5.935626                | 0.393324  | 0.177919  |

951aa\_model1C\_chexane\_Ph\_CN2\_b3lyp631dp\_PCMdce.log

Standard orientation:

| Center<br>Number | Atomic<br>Number | Atomic<br>Type | Coordinates (Angstroms) |           |           |
|------------------|------------------|----------------|-------------------------|-----------|-----------|
|                  |                  |                | X                       | Y         | Z         |
| 1                | 6                | 0              | -4.042957               | -1.129389 | 0.786647  |
| 2                | 6                | 0              | -3.476622               | 0.122635  | 0.101548  |
| 3                | 6                | 0              | -1.920976               | 0.087889  | 0.073315  |
| 4                | 6                | 0              | -1.424625               | -1.205110 | -0.617037 |
| 5                | 6                | 0              | -1.993965               | -2.451321 | 0.090843  |
| 6                | 6                | 0              | -3.529831               | -2.416893 | 0.129256  |
| 7                | 1                | 0              | -3.756575               | -1.120977 | 1.846924  |
| 8                | 1                | 0              | -3.852853               | 0.184127  | -0.927982 |
| 9                | 1                | 0              | -1.649601               | -3.356261 | -0.421803 |
| 10               | 1                | 0              | -3.910845               | -3.293241 | 0.665389  |
| 11               | 6                | 0              | 0.493187                | -2.020833 | -1.900624 |
| 12               | 1                | 0              | -0.052114               | -1.770073 | -2.815105 |
| 13               | 1                | 0              | 1.556652                | -1.846039 | -2.081094 |
| 14               | 1                | 0              | 0.359557                | -3.098418 | -1.702938 |
| 15               | 6                | 0              | 0.826885                | -1.386787 | 0.414410  |
| 16               | 1                | 0              | 0.342183                | -0.848291 | 1.236943  |
| 17               | 1                | 0              | 0.839314                | -2.450044 | 0.710628  |
| 18               | 7                | 0              | 0.040361                | -1.163806 | -0.804582 |
| 19               | 6                | 0              | -1.392609               | 1.280937  | -0.653027 |

|    |   |   |           |           |           |
|----|---|---|-----------|-----------|-----------|
| 20 | 6 | 0 | -0.961110 | 2.436254  | -0.084626 |
| 21 | 1 | 0 | -1.404455 | 1.241473  | -1.739543 |
| 22 | 6 | 0 | -0.901429 | 2.619147  | 1.338484  |
| 23 | 7 | 0 | -0.853064 | 2.773362  | 2.490391  |
| 24 | 6 | 0 | -0.537477 | 3.547453  | -0.888352 |
| 25 | 7 | 0 | -0.194263 | 4.448089  | -1.539510 |
| 26 | 1 | 0 | -1.607715 | -2.501624 | 1.117091  |
| 27 | 1 | 0 | -3.920522 | -2.482770 | -0.895572 |
| 28 | 1 | 0 | -5.137759 | -1.093986 | 0.756370  |
| 29 | 1 | 0 | -3.810625 | 1.028456  | 0.617694  |
| 30 | 1 | 0 | -1.576123 | 0.113023  | 1.114136  |
| 31 | 1 | 0 | -1.842471 | -1.186892 | -1.633564 |
| 32 | 6 | 0 | 2.262251  | -0.898307 | 0.303029  |
| 33 | 6 | 0 | 3.305215  | -1.650068 | 0.857411  |
| 34 | 6 | 0 | 2.567498  | 0.327373  | -0.304540 |
| 35 | 6 | 0 | 4.622434  | -1.186537 | 0.817680  |
| 36 | 1 | 0 | 3.084519  | -2.606897 | 1.324516  |
| 37 | 6 | 0 | 3.882650  | 0.790646  | -0.351551 |
| 38 | 1 | 0 | 1.765569  | 0.907351  | -0.749467 |
| 39 | 6 | 0 | 4.915390  | 0.036537  | 0.212394  |
| 40 | 1 | 0 | 5.418153  | -1.784266 | 1.253133  |
| 41 | 1 | 0 | 4.102030  | 1.742223  | -0.827703 |
| 42 | 1 | 0 | 5.938997  | 0.397850  | 0.176289  |

951aa\_model1C\_chexane\_Ph\_CN2\_b3lyp631dp\_PCMdmsol.log

Standard orientation:

| Center<br>Number | Atomic<br>Number | Atomic<br>Type | Coordinates (Angstroms) |           |           |
|------------------|------------------|----------------|-------------------------|-----------|-----------|
|                  |                  |                | X                       | Y         | Z         |
| 1                | 6                | 0              | -4.041954               | -1.123986 | 0.798338  |
| 2                | 6                | 0              | -3.476952               | 0.128831  | 0.113643  |
| 3                | 6                | 0              | -1.921320               | 0.091338  | 0.078001  |
| 4                | 6                | 0              | -1.430136               | -1.201147 | -0.617106 |
| 5                | 6                | 0              | -1.999178               | -2.448107 | 0.089459  |
| 6                | 6                | 0              | -3.534763               | -2.410464 | 0.134440  |
| 7                | 1                | 0              | -3.750002               | -1.119260 | 1.857118  |
| 8                | 1                | 0              | -3.857712               | 0.193288  | -0.913909 |
| 9                | 1                | 0              | -1.658905               | -3.351989 | -0.427738 |
| 10               | 1                | 0              | -3.915150               | -3.287692 | 0.669616  |
| 11               | 6                | 0              | 0.482442                | -2.014717 | -1.909995 |
| 12               | 1                | 0              | -0.064539               | -1.757670 | -2.821624 |
| 13               | 1                | 0              | 1.546112                | -1.842296 | -2.092366 |
| 14               | 1                | 0              | 0.346176                | -3.092775 | -1.717271 |
| 15               | 6                | 0              | 0.823253                | -1.395373 | 0.407630  |
| 16               | 1                | 0              | 0.339968                | -0.864084 | 1.235629  |
| 17               | 1                | 0              | 0.836268                | -2.460974 | 0.694734  |
| 18               | 7                | 0              | 0.034961                | -1.161978 | -0.808188 |
| 19               | 6                | 0              | -1.396962               | 1.284277  | -0.650712 |
| 20               | 6                | 0              | -0.954814               | 2.436983  | -0.084487 |
| 21               | 1                | 0              | -1.422931               | 1.248205  | -1.737081 |
| 22               | 6                | 0              | -0.874926               | 2.616785  | 1.337834  |
| 23               | 7                | 0              | -0.807814               | 2.770948  | 2.488857  |
| 24               | 6                | 0              | -0.538084               | 3.549495  | -0.889668 |
| 25               | 7                | 0              | -0.199328               | 4.452436  | -1.540068 |
| 26               | 1                | 0              | -1.608975               | -2.502441 | 1.113951  |
| 27               | 1                | 0              | -3.930052               | -2.471916 | -0.888832 |
| 28               | 1                | 0              | -5.136824               | -1.086118 | 0.773411  |
| 29               | 1                | 0              | -3.806715               | 1.034011  | 0.633572  |
| 30               | 1                | 0              | -1.570596               | 0.114758  | 1.116890  |
| 31               | 1                | 0              | -1.850497               | -1.179731 | -1.632224 |
| 32               | 6                | 0              | 2.258467                | -0.905618 | 0.298583  |
| 33               | 6                | 0              | 3.302455                | -1.661475 | 0.845877  |
| 34               | 6                | 0              | 2.562910                | 0.325129  | -0.299406 |
| 35               | 6                | 0              | 4.619635                | -1.197140 | 0.808647  |
| 36               | 1                | 0              | 3.082599                | -2.622193 | 1.305241  |
| 37               | 6                | 0              | 3.877999                | 0.789343  | -0.343875 |
| 38               | 1                | 0              | 1.760320                | 0.908370  | -0.738898 |
| 39               | 6                | 0              | 4.911728                | 0.031057  | 0.213019  |
| 40               | 1                | 0              | 5.415968                | -1.798234 | 1.238306  |
| 41               | 1                | 0              | 4.096766                | 1.744688  | -0.812792 |
| 42               | 1                | 0              | 5.935198                | 0.392952  | 0.178724  |

951aa\_model1C\_chexane\_Ph\_CN2\_b3lyp631dp\_PCMtol.log

Standard orientation:

| Center<br>Number | Atomic<br>Number | Atomic<br>Type | Coordinates (Angstroms) |           |           |
|------------------|------------------|----------------|-------------------------|-----------|-----------|
|                  |                  |                | X                       | Y         | Z         |
| 1                | 6                | 0              | -4.043741               | -1.150490 | 0.752487  |
| 2                | 6                | 0              | -3.475885               | 0.099659  | 0.065049  |
| 3                | 6                | 0              | -1.920555               | 0.075884  | 0.057748  |
| 4                | 6                | 0              | -1.406333               | -1.218275 | -0.616770 |
| 5                | 6                | 0              | -1.974955               | -2.462688 | 0.095677  |
| 6                | 6                | 0              | -3.511462               | -2.440253 | 0.114691  |
| 7                | 1                | 0              | -3.772975               | -1.130206 | 1.816713  |
| 8                | 1                | 0              | -3.839474               | 0.150872  | -0.969981 |
| 9                | 1                | 0              | -1.616839               | -3.370227 | -0.402923 |
| 10               | 1                | 0              | -3.893038               | -3.314582 | 0.653723  |
| 11               | 6                | 0              | 0.530054                | -2.036852 | -1.869985 |
| 12               | 1                | 0              | -0.009602               | -1.805985 | -2.793279 |
| 13               | 1                | 0              | 1.592821                | -1.852868 | -2.043683 |
| 14               | 1                | 0              | 0.406349                | -3.113262 | -1.657870 |
| 15               | 6                | 0              | 0.838598                | -1.358826 | 0.437016  |
| 16               | 1                | 0              | 0.349038                | -0.798171 | 1.241850  |
| 17               | 1                | 0              | 0.849670                | -2.414289 | 0.761260  |
| 18               | 7                | 0              | 0.058524                | -1.168492 | -0.791786 |
| 19               | 6                | 0              | -1.383556               | 1.270554  | -0.662190 |
| 20               | 6                | 0              | -0.985197               | 2.433677  | -0.087518 |
| 21               | 1                | 0              | -1.354841               | 1.222091  | -1.748048 |
| 22               | 6                | 0              | -0.982322               | 2.622103  | 1.336621  |
| 23               | 7                | 0              | -0.985833               | 2.772074  | 2.490010  |
| 24               | 6                | 0              | -0.543819               | 3.543208  | -0.884748 |
| 25               | 7                | 0              | -0.187425               | 4.438853  | -1.535472 |
| 26               | 1                | 0              | -1.600724               | -2.499737 | 1.127052  |
| 27               | 1                | 0              | -3.888500               | -2.519580 | -0.914469 |
| 28               | 1                | 0              | -5.138295               | -1.124299 | 0.707246  |
| 29               | 1                | 0              | -3.823372               | 1.007191  | 0.569310  |
| 30               | 1                | 0              | -1.592016               | 0.107454  | 1.103766  |
| 31               | 1                | 0              | -1.815065               | -1.212279 | -1.637790 |
| 32               | 6                | 0              | 2.274087                | -0.873457 | 0.318398  |
| 33               | 6                | 0              | 3.318115                | -1.623121 | 0.872248  |
| 34               | 6                | 0              | 2.577290                | 0.347937  | -0.298134 |
| 35               | 6                | 0              | 4.635317                | -1.161500 | 0.823291  |
| 36               | 1                | 0              | 3.098352                | -2.576624 | 1.346717  |
| 37               | 6                | 0              | 3.892227                | 0.809143  | -0.354103 |
| 38               | 1                | 0              | 1.774293                | 0.926429  | -0.743088 |
| 39               | 6                | 0              | 4.926270                | 0.057112  | 0.209365  |
| 40               | 1                | 0              | 5.432471                | -1.757164 | 1.258923  |
| 41               | 1                | 0              | 4.110103                | 1.757930  | -0.836253 |
| 42               | 1                | 0              | 5.949981                | 0.417368  | 0.166718  |

951aa\_model1C\_chexane\_Ph\_CN2\_b3lyp631dp\_PCMw.log

Standard orientation:

| Center<br>Number | Atomic<br>Number | Atomic<br>Type | Coordinates (Angstroms) |           |           |
|------------------|------------------|----------------|-------------------------|-----------|-----------|
|                  |                  |                | X                       | Y         | Z         |
| 1                | 6                | 0              | -4.041938               | -1.123187 | 0.800050  |
| 2                | 6                | 0              | -3.477112               | 0.129778  | 0.115498  |
| 3                | 6                | 0              | -1.921468               | 0.091986  | 0.078834  |
| 4                | 6                | 0              | -1.430984               | -1.200463 | -0.616961 |
| 5                | 6                | 0              | -1.999955               | -2.447529 | 0.089430  |
| 6                | 6                | 0              | -3.535507               | -2.409487 | 0.135248  |
| 7                | 1                | 0              | -3.749298               | -1.119007 | 1.858643  |
| 8                | 1                | 0              | -3.858509               | 0.194697  | -0.911765 |
| 9                | 1                | 0              | -1.660203               | -3.351261 | -0.428370 |
| 10               | 1                | 0              | -3.915824               | -3.286865 | 0.670237  |
| 11               | 6                | 0              | 0.480624                | -2.013660 | -1.911486 |
| 12               | 1                | 0              | -0.066398               | -1.755238 | -2.822693 |
| 13               | 1                | 0              | 1.544394                | -1.841906 | -2.093947 |
| 14               | 1                | 0              | 0.343514                | -3.091755 | -1.719742 |
| 15               | 6                | 0              | 0.822734                | -1.396709 | 0.406591  |
| 16               | 1                | 0              | 0.339593                | -0.866604 | 1.235398  |
| 17               | 1                | 0              | 0.835892                | -2.462688 | 0.692192  |
| 18               | 7                | 0              | 0.034105                | -1.161615 | -0.808720 |

|    |   |   |           |           |           |
|----|---|---|-----------|-----------|-----------|
| 19 | 6 | 0 | -1.397850 | 1.284936  | -0.650246 |
| 20 | 6 | 0 | -0.953733 | 2.437102  | -0.084370 |
| 21 | 1 | 0 | -1.426430 | 1.249536  | -1.736573 |
| 22 | 6 | 0 | -0.870258 | 2.616197  | 1.337802  |
| 23 | 7 | 0 | -0.799865 | 2.770014  | 2.488683  |
| 24 | 6 | 0 | -0.538338 | 3.549923  | -0.889774 |
| 25 | 7 | 0 | -0.200632 | 4.453311  | -1.540114 |
| 26 | 1 | 0 | -1.609238 | -2.502398 | 1.113689  |
| 27 | 1 | 0 | -3.931353 | -2.470312 | -0.887837 |
| 28 | 1 | 0 | -5.136816 | -1.085008 | 0.775791  |
| 29 | 1 | 0 | -3.806306 | 1.034835  | 0.636008  |
| 30 | 1 | 0 | -1.569931 | 0.115232  | 1.117438  |
| 31 | 1 | 0 | -1.851834 | -1.178560 | -1.631821 |
| 32 | 6 | 0 | 2.257861  | -0.906742 | 0.297828  |
| 33 | 6 | 0 | 3.302072  | -1.663473 | 0.843523  |
| 34 | 6 | 0 | 2.562121  | 0.325029  | -0.298229 |
| 35 | 6 | 0 | 4.619263  | -1.199062 | 0.806622  |
| 36 | 1 | 0 | 3.082387  | -2.624936 | 1.301386  |
| 37 | 6 | 0 | 3.877216  | 0.789346  | -0.342357 |
| 38 | 1 | 0 | 1.759381  | 0.908979  | -0.736492 |
| 39 | 6 | 0 | 4.911174  | 0.030136  | 0.212921  |
| 40 | 1 | 0 | 5.415733  | -1.800884 | 1.234993  |
| 41 | 1 | 0 | 4.095817  | 1.745443  | -0.809813 |
| 42 | 1 | 0 | 5.934653  | 0.392004  | 0.178801  |

953aa\_model1C\_chexane\_trans\_Ph\_CN2\_b3lyp631dp\_PCMacn\_TS\_CH.log

Standard orientation:

| Center<br>Number | Atomic<br>Number | Atomic<br>Type | Coordinates (Angstroms) |           |           |
|------------------|------------------|----------------|-------------------------|-----------|-----------|
|                  |                  |                | X                       | Y         | Z         |
| 1                | 6                | 0              | -4.165127               | -0.872250 | 0.312174  |
| 2                | 6                | 0              | -3.269352               | 0.129704  | -0.435457 |
| 3                | 6                | 0              | -1.796016               | -0.037819 | -0.004370 |
| 4                | 6                | 0              | -1.365550               | -1.489248 | -0.335326 |
| 5                | 6                | 0              | -2.197788               | -2.488823 | 0.480345  |
| 6                | 6                | 0              | -3.689123               | -2.324149 | 0.140275  |
| 7                | 1                | 0              | -4.166375               | -0.614614 | 1.379785  |
| 8                | 1                | 0              | -3.352557               | -0.018568 | -1.520380 |
| 9                | 1                | 0              | -1.869280               | -3.510572 | 0.260954  |
| 10               | 1                | 0              | -4.290359               | -2.994636 | 0.763701  |
| 11               | 6                | 0              | 0.679446                | -2.554659 | -1.246355 |
| 12               | 1                | 0              | 0.666744                | -2.093648 | -2.243553 |
| 13               | 1                | 0              | 1.704878                | -2.814976 | -0.985788 |
| 14               | 1                | 0              | 0.092548                | -3.475242 | -1.291156 |
| 15               | 6                | 0              | 0.800378                | -0.669876 | 0.378048  |
| 16               | 1                | 0              | 0.280944                | 0.474271  | -0.209082 |
| 17               | 1                | 0              | 0.402182                | -0.405509 | 1.361142  |
| 18               | 7                | 0              | 0.101574                | -1.696045 | -0.216473 |
| 19               | 6                | 0              | -0.860713               | 0.995824  | -0.615670 |
| 20               | 6                | 0              | -0.939749               | 2.371787  | -0.209602 |
| 21               | 1                | 0              | -0.690835               | 0.866881  | -1.687833 |
| 22               | 6                | 0              | -1.444162               | 2.750920  | 1.055443  |
| 23               | 7                | 0              | -1.870684               | 3.059100  | 2.101624  |
| 24               | 6                | 0              | -0.389319               | 3.388520  | -1.022452 |
| 25               | 7                | 0              | 0.059233                | 4.224115  | -1.708812 |
| 26               | 1                | 0              | -2.024102               | -2.317452 | 1.550302  |
| 27               | 1                | 0              | -3.850452               | -2.637007 | -0.900294 |
| 28               | 1                | 0              | -5.199780               | -0.772770 | -0.034427 |
| 29               | 1                | 0              | -3.590350               | 1.155658  | -0.229227 |
| 30               | 1                | 0              | -1.769860               | 0.096484  | 1.086135  |
| 31               | 1                | 0              | -1.596930               | -1.656085 | -1.397440 |
| 32               | 6                | 0              | 2.276386                | -0.529640 | 0.302081  |
| 33               | 6                | 0              | 2.991499                | -0.403817 | 1.505485  |
| 34               | 6                | 0              | 2.975064                | -0.444003 | -0.915744 |
| 35               | 6                | 0              | 4.375245                | -0.235278 | 1.494273  |
| 36               | 1                | 0              | 2.459726                | -0.449094 | 2.451325  |
| 37               | 6                | 0              | 4.356393                | -0.265632 | -0.923561 |
| 38               | 1                | 0              | 2.437683                | -0.492934 | -1.856527 |
| 39               | 6                | 0              | 5.060784                | -0.167265 | 0.279850  |
| 40               | 1                | 0              | 4.915160                | -0.151508 | 2.432159  |
| 41               | 1                | 0              | 4.882921                | -0.195863 | -1.870157 |
| 42               | 1                | 0              | 6.137459                | -0.028774 | 0.269371  |

953aa\_model1C\_chexane\_trans\_Ph\_CN2\_b3lyp631dp\_PCMdce\_TS\_CH\_f2.log

Standard orientation:

| Center<br>Number | Atomic<br>Number | Atomic<br>Type | Coordinates (Angstroms) |           |           |
|------------------|------------------|----------------|-------------------------|-----------|-----------|
|                  |                  |                | X                       | Y         | Z         |
| 1                | 6                | 0              | -4.165852               | -0.864892 | 0.312097  |
| 2                | 6                | 0              | -3.267353               | 0.135281  | -0.434552 |
| 3                | 6                | 0              | -1.794744               | -0.035099 | -0.003485 |
| 4                | 6                | 0              | -1.367164               | -1.487132 | -0.332765 |
| 5                | 6                | 0              | -2.202022               | -2.485616 | 0.481636  |
| 6                | 6                | 0              | -3.692802               | -2.317813 | 0.140430  |
| 7                | 1                | 0              | -4.167535               | -0.607293 | 1.379658  |
| 8                | 1                | 0              | -3.350631               | -0.012266 | -1.519788 |
| 9                | 1                | 0              | -1.875392               | -3.508282 | 0.263266  |
| 10               | 1                | 0              | -4.295764               | -2.987367 | 0.763178  |
| 11               | 6                | 0              | 0.675064                | -2.569747 | -1.230944 |
| 12               | 1                | 0              | 0.665060                | -2.121183 | -2.234003 |
| 13               | 1                | 0              | 1.699269                | -2.830829 | -0.966484 |
| 14               | 1                | 0              | 0.084727                | -3.488675 | -1.265466 |
| 15               | 6                | 0              | 0.802802                | -0.675539 | 0.382119  |
| 16               | 1                | 0              | 0.277550                | 0.482066  | -0.212109 |
| 17               | 1                | 0              | 0.402546                | -0.402383 | 1.361808  |
| 18               | 7                | 0              | 0.099573                | -1.696692 | -0.212606 |
| 19               | 6                | 0              | -0.855420               | 0.996007  | -0.615505 |
| 20               | 6                | 0              | -0.938475               | 2.374093  | -0.213354 |
| 21               | 1                | 0              | -0.692446               | 0.866660  | -1.688999 |
| 22               | 6                | 0              | -1.437774               | 2.751115  | 1.054322  |
| 23               | 7                | 0              | -1.860583               | 3.051396  | 2.104241  |
| 24               | 6                | 0              | -0.391855               | 3.388598  | -1.031576 |
| 25               | 7                | 0              | 0.054362                | 4.219120  | -1.725398 |
| 26               | 1                | 0              | -2.029000               | -2.314505 | 1.551748  |
| 27               | 1                | 0              | -3.854125               | -2.630439 | -0.900310 |
| 28               | 1                | 0              | -5.200129               | -0.763432 | -0.034962 |
| 29               | 1                | 0              | -3.585790               | 1.161878  | -0.228246 |
| 30               | 1                | 0              | -1.768525               | 0.100113  | 1.086904  |
| 31               | 1                | 0              | -1.597286               | -1.653732 | -1.395464 |
| 32               | 6                | 0              | 2.276832                | -0.534161 | 0.303470  |
| 33               | 6                | 0              | 2.990994                | -0.382132 | 1.504672  |
| 34               | 6                | 0              | 2.976765                | -0.469495 | -0.915283 |
| 35               | 6                | 0              | 4.373886                | -0.208924 | 1.491277  |
| 36               | 1                | 0              | 2.458580                | -0.410142 | 2.450792  |
| 37               | 6                | 0              | 4.357189                | -0.286371 | -0.925380 |
| 38               | 1                | 0              | 2.440731                | -0.536844 | -1.855666 |
| 39               | 6                | 0              | 5.060201                | -0.162212 | 0.276396  |
| 40               | 1                | 0              | 4.912584                | -0.104364 | 2.427750  |
| 41               | 1                | 0              | 4.884178                | -0.231989 | -1.872714 |
| 42               | 1                | 0              | 6.136288                | -0.019531 | 0.263993  |

953aa\_model1C\_chexane\_trans\_Ph\_CN2\_b3lyp631dp\_PCMdms0\_TS\_CH\_f2.log

Standard orientation:

| Center<br>Number | Atomic<br>Number | Atomic<br>Type | Coordinates (Angstroms) |           |           |
|------------------|------------------|----------------|-------------------------|-----------|-----------|
|                  |                  |                | X                       | Y         | Z         |
| 1                | 6                | 0              | -4.165076               | -0.872973 | 0.312033  |
| 2                | 6                | 0              | -3.269558               | 0.129126  | -0.435725 |
| 3                | 6                | 0              | -1.796162               | -0.038070 | -0.004518 |
| 4                | 6                | 0              | -1.365365               | -1.489460 | -0.335558 |
| 5                | 6                | 0              | -2.197400               | -2.489116 | 0.480224  |
| 6                | 6                | 0              | -3.688764               | -2.324773 | 0.140122  |
| 7                | 1                | 0              | -4.166233               | -0.615323 | 1.379646  |
| 8                | 1                | 0              | -3.352667               | -0.019326 | -1.520603 |
| 9                | 1                | 0              | -1.868671               | -3.510783 | 0.260826  |
| 10               | 1                | 0              | -4.289906               | -2.995388 | 0.763504  |
| 11               | 6                | 0              | 0.679944                | -2.553099 | -1.247864 |
| 12               | 1                | 0              | 0.667127                | -2.090723 | -2.244414 |
| 13               | 1                | 0              | 1.705449                | -2.813449 | -0.987600 |
| 14               | 1                | 0              | 0.093311                | -3.473781 | -1.293868 |
| 15               | 6                | 0              | 0.800146                | -0.669285 | 0.377645  |
| 16               | 1                | 0              | 0.281288                | 0.473538  | -0.208943 |
| 17               | 1                | 0              | 0.402118                | -0.405698 | 1.361023  |



|    |   |   |           |           |           |
|----|---|---|-----------|-----------|-----------|
| 18 | 7 | 0 | 0.101807  | -1.696009 | -0.216779 |
| 19 | 6 | 0 | -0.861253 | 0.995826  | -0.615693 |
| 20 | 6 | 0 | -0.939903 | 2.371559  | -0.209129 |
| 21 | 1 | 0 | -0.690782 | 0.867021  | -1.687745 |
| 22 | 6 | 0 | -1.444962 | 2.750824  | 1.055612  |
| 23 | 7 | 0 | -1.872003 | 3.059727  | 2.101375  |
| 24 | 6 | 0 | -0.388930 | 3.388536  | -1.021299 |
| 25 | 7 | 0 | 0.060010  | 4.224599  | -1.706852 |
| 26 | 1 | 0 | -2.023749 | -2.317636 | 1.550167  |
| 27 | 1 | 0 | -3.849956 | -2.637595 | -0.900467 |
| 28 | 1 | 0 | -5.199777 | -0.773686 | -0.034487 |
| 29 | 1 | 0 | -3.590859 | 1.155029  | -0.229624 |
| 30 | 1 | 0 | -1.770102 | 0.096188  | 1.085991  |
| 31 | 1 | 0 | -1.596804 | -1.656357 | -1.397612 |
| 32 | 6 | 0 | 2.276339  | -0.529132 | 0.301931  |
| 33 | 6 | 0 | 2.991612  | -0.406271 | 1.505532  |
| 34 | 6 | 0 | 2.974836  | -0.441084 | -0.915778 |
| 35 | 6 | 0 | 4.375447  | -0.238278 | 1.494512  |
| 36 | 1 | 0 | 2.459938  | -0.453512 | 2.451335  |
| 37 | 6 | 0 | 4.356271  | -0.263251 | -0.923392 |
| 38 | 1 | 0 | 2.437248  | -0.487831 | -1.856558 |
| 39 | 6 | 0 | 5.060862  | -0.167836 | 0.280140  |
| 40 | 1 | 0 | 4.915527  | -0.156859 | 2.432514  |
| 41 | 1 | 0 | 4.882701  | -0.191694 | -1.869911 |
| 42 | 1 | 0 | 6.137601  | -0.029807 | 0.269835  |

-----

953aa\_model1C\_chexane\_trans\_Ph\_CN2\_b3lyp631dp\_PCMtol\_TS\_CH\_f.log

Standard orientation:

| Center<br>Number | Atomic<br>Number | Atomic<br>Type | Coordinates (Angstroms) |           |           |
|------------------|------------------|----------------|-------------------------|-----------|-----------|
|                  |                  |                | X                       | Y         | Z         |
| 1                | 6                | 0              | -4.161100               | -0.854136 | 0.327080  |
| 2                | 6                | 0              | -3.263213               | 0.141037  | -0.426258 |
| 3                | 6                | 0              | -1.788947               | -0.030981 | -0.006311 |
| 4                | 6                | 0              | -1.366331               | -1.484220 | -0.329567 |
| 5                | 6                | 0              | -2.201028               | -2.479510 | 0.489511  |
| 6                | 6                | 0              | -3.693109               | -2.308651 | 0.155187  |
| 7                | 1                | 0              | -4.156172               | -0.594406 | 1.393996  |
| 8                | 1                | 0              | -3.354794               | -0.008059 | -1.511169 |
| 9                | 1                | 0              | -1.878676               | -3.504889 | 0.275857  |
| 10               | 1                | 0              | -4.294177               | -2.976939 | 0.781183  |
| 11               | 6                | 0              | 0.667332                | -2.614404 | -1.193449 |
| 12               | 1                | 0              | 0.668095                | -2.201114 | -2.212186 |
| 13               | 1                | 0              | 1.686827                | -2.880746 | -0.916115 |
| 14               | 1                | 0              | 0.064265                | -3.525945 | -1.200446 |
| 15               | 6                | 0              | 0.816561                | -0.691735 | 0.382126  |
| 16               | 1                | 0              | 0.262573                | 0.517731  | -0.247520 |
| 17               | 1                | 0              | 0.404710                | -0.383625 | 1.345284  |
| 18               | 7                | 0              | 0.100691                | -1.699329 | -0.209934 |
| 19               | 6                | 0              | -0.848249               | 0.998529  | -0.628253 |
| 20               | 6                | 0              | -0.950412               | 2.381389  | -0.229992 |
| 21               | 1                | 0              | -0.721558               | 0.876407  | -1.708542 |
| 22               | 6                | 0              | -1.421218               | 2.739411  | 1.053882  |
| 23               | 7                | 0              | -1.822063               | 3.002537  | 2.122107  |
| 24               | 6                | 0              | -0.431520               | 3.397264  | -1.064512 |
| 25               | 7                | 0              | -0.005110               | 4.219286  | -1.779930 |
| 26               | 1                | 0              | -2.023060               | -2.304566 | 1.558281  |
| 27               | 1                | 0              | -3.860363               | -2.622750 | -0.884471 |
| 28               | 1                | 0              | -5.197450               | -0.751044 | -0.013143 |
| 29               | 1                | 0              | -3.575138               | 1.169435  | -0.220762 |
| 30               | 1                | 0              | -1.755522               | 0.109236  | 1.083326  |
| 31               | 1                | 0              | -1.596456               | -1.655097 | -1.392389 |
| 32               | 6                | 0              | 2.283019                | -0.542550 | 0.301459  |
| 33               | 6                | 0              | 2.983445                | -0.289816 | 1.495303  |
| 34               | 6                | 0              | 2.998725                | -0.557940 | -0.911209 |
| 35               | 6                | 0              | 4.362972                | -0.098386 | 1.484012  |
| 36               | 1                | 0              | 2.440306                | -0.252150 | 2.435082  |
| 37               | 6                | 0              | 4.375900                | -0.357240 | -0.919310 |
| 38               | 1                | 0              | 2.475954                | -0.695287 | -1.851126 |
| 39               | 6                | 0              | 5.063354                | -0.134508 | 0.277073  |
| 40               | 1                | 0              | 4.888593                | 0.085564  | 2.415651  |
| 41               | 1                | 0              | 4.912944                | -0.363171 | -1.862570 |
| 42               | 1                | 0              | 6.137389                | 0.022646  | 0.265445  |

-----  
953aa\_model1C\_chexane\_trans\_Ph\_CN2\_b3lyp631dp\_TS\_CH.log

Standard orientation:

| Center<br>Number | Atomic<br>Number | Atomic<br>Type | Coordinates (Angstroms) |           |           |
|------------------|------------------|----------------|-------------------------|-----------|-----------|
|                  |                  |                | X                       | Y         | Z         |
| 1                | 6                | 0              | -4.150122               | -0.855685 | 0.349094  |
| 2                | 6                | 0              | -3.257649               | 0.136794  | -0.412952 |
| 3                | 6                | 0              | -1.779270               | -0.031482 | -0.010610 |
| 4                | 6                | 0              | -1.357374               | -1.484575 | -0.327783 |
| 5                | 6                | 0              | -2.189431               | -2.479242 | 0.496352  |
| 6                | 6                | 0              | -3.683859               | -2.309995 | 0.172363  |
| 7                | 1                | 0              | -4.135104               | -0.595851 | 1.415884  |
| 8                | 1                | 0              | -3.361119               | -0.013443 | -1.497099 |
| 9                | 1                | 0              | -1.869026               | -3.506566 | 0.286806  |
| 10               | 1                | 0              | -4.279451               | -2.980619 | 0.801321  |
| 11               | 6                | 0              | 0.665825                | -2.664998 | -1.149528 |
| 12               | 1                | 0              | 0.684580                | -2.288012 | -2.182738 |
| 13               | 1                | 0              | 1.677433                | -2.942289 | -0.853659 |
| 14               | 1                | 0              | 0.044599                | -3.564531 | -1.132831 |
| 15               | 6                | 0              | 0.841873                | -0.714394 | 0.384188  |
| 16               | 1                | 0              | 0.245168                | 0.570416  | -0.301176 |
| 17               | 1                | 0              | 0.413863                | -0.359933 | 1.322071  |
| 18               | 7                | 0              | 0.109980                | -1.705637 | -0.206226 |
| 19               | 6                | 0              | -0.847995               | 1.002204  | -0.649867 |
| 20               | 6                | 0              | -0.980454               | 2.389060  | -0.249490 |
| 21               | 1                | 0              | -0.769908               | 0.891455  | -1.736943 |
| 22               | 6                | 0              | -1.412423               | 2.716186  | 1.055696  |
| 23               | 7                | 0              | -1.783024               | 2.926640  | 2.146289  |
| 24               | 6                | 0              | -0.508538               | 3.414741  | -1.099142 |
| 25               | 7                | 0              | -0.118276               | 4.237180  | -1.833767 |
| 26               | 1                | 0              | -2.005774               | -2.300480 | 1.563632  |
| 27               | 1                | 0              | -3.858308               | -2.623328 | -0.866616 |
| 28               | 1                | 0              | -5.190036               | -0.753041 | 0.019611  |
| 29               | 1                | 0              | -3.564565               | 1.166399  | -0.206845 |
| 30               | 1                | 0              | -1.733795               | 0.115763  | 1.077782  |
| 31               | 1                | 0              | -1.586697               | -1.660407 | -1.390888 |
| 32               | 6                | 0              | 2.297221                | -0.549972 | 0.299059  |
| 33               | 6                | 0              | 2.979025                | -0.169740 | 1.472733  |
| 34               | 6                | 0              | 3.035685                | -0.661668 | -0.897483 |
| 35               | 6                | 0              | 4.352487                | 0.053073  | 1.460962  |
| 36               | 1                | 0              | 2.422094                | -0.055917 | 2.398343  |
| 37               | 6                | 0              | 4.407425                | -0.431886 | -0.905156 |
| 38               | 1                | 0              | 2.532622                | -0.891057 | -1.829751 |
| 39               | 6                | 0              | 5.072904                | -0.081642 | 0.272893  |
| 40               | 1                | 0              | 4.859036                | 0.337651  | 2.377840  |
| 41               | 1                | 0              | 4.958363                | -0.512656 | -1.837075 |
| 42               | 1                | 0              | 6.143298                | 0.098488  | 0.260274  |

-----  
953ba\_model1C\_chexane\_trans\_Ph\_CN2\_b3lyp631dp\_PCMdmso\_TS\_CHfix.log

Standard orientation:

| Center<br>Number | Atomic<br>Number | Atomic<br>Type | Coordinates (Angstroms) |           |           |
|------------------|------------------|----------------|-------------------------|-----------|-----------|
|                  |                  |                | X                       | Y         | Z         |
| 1                | 6                | 0              | 3.003603                | 0.855639  | -1.906680 |
| 2                | 6                | 0              | 2.089239                | 1.632408  | -0.946952 |
| 3                | 6                | 0              | 1.120630                | 0.681473  | -0.204348 |
| 4                | 6                | 0              | 1.958220                | -0.366426 | 0.560521  |
| 5                | 6                | 0              | 2.821208                | -1.186761 | -0.407998 |
| 6                | 6                | 0              | 3.771164                | -0.263707 | -1.188091 |
| 7                | 1                | 0              | 2.391767                | 0.420497  | -2.708182 |
| 8                | 1                | 0              | 2.693741                | 2.179911  | -0.211419 |
| 9                | 1                | 0              | 3.390554                | -1.936510 | 0.152051  |
| 10               | 1                | 0              | 4.351840                | -0.849773 | -1.908539 |
| 11               | 6                | 0              | 1.838477                | -1.453738 | 2.769625  |
| 12               | 1                | 0              | 1.931806                | -0.541425 | 3.376777  |
| 13               | 1                | 0              | 1.299840                | -2.211502 | 3.341053  |
| 14               | 1                | 0              | 2.841250                | -1.835484 | 2.565064  |
| 15               | 6                | 0              | -0.209181               | -0.953191 | 1.600643  |
| 16               | 1                | 0              | -0.308916               | 0.439588  | 1.381585  |

|    |   |   |           |           |           |
|----|---|---|-----------|-----------|-----------|
| 17 | 1 | 0 | -0.586608 | -0.996476 | 2.624835  |
| 18 | 7 | 0 | 1.150186  | -1.211140 | 1.495945  |
| 19 | 6 | 0 | 0.168279  | 1.441565  | 0.706792  |
| 20 | 6 | 0 | -0.924838 | 2.176750  | 0.142532  |
| 21 | 1 | 0 | 0.650722  | 1.946427  | 1.547315  |
| 22 | 6 | 0 | -1.430437 | 1.911762  | -1.153298 |
| 23 | 7 | 0 | -1.836091 | 1.713154  | -2.232924 |
| 24 | 6 | 0 | -1.593577 | 3.161402  | 0.908254  |
| 25 | 7 | 0 | -2.135928 | 3.976214  | 1.548876  |
| 26 | 1 | 0 | 2.172914  | -1.730935 | -1.105400 |
| 27 | 1 | 0 | 4.494055  | 0.180342  | -0.490145 |
| 28 | 1 | 0 | 3.703811  | 1.547930  | -2.387356 |
| 29 | 1 | 0 | 1.504635  | 2.378496  | -1.494663 |
| 30 | 1 | 0 | 0.519881  | 0.165697  | -0.964214 |
| 31 | 1 | 0 | 2.647760  | 0.196746  | 1.208853  |
| 32 | 6 | 0 | -1.184318 | -1.426516 | 0.589801  |
| 33 | 6 | 0 | -2.525020 | -1.012912 | 0.704426  |
| 34 | 6 | 0 | -0.818705 | -2.275700 | -0.466876 |
| 35 | 6 | 0 | -3.471630 | -1.423948 | -0.229990 |
| 36 | 1 | 0 | -2.819696 | -0.369373 | 1.528970  |
| 37 | 6 | 0 | -1.770381 | -2.687315 | -1.398479 |
| 38 | 1 | 0 | 0.202663  | -2.633371 | -0.530617 |
| 39 | 6 | 0 | -3.094996 | -2.256131 | -1.288618 |
| 40 | 1 | 0 | -4.502401 | -1.097465 | -0.133682 |
| 41 | 1 | 0 | -1.479576 | -3.351283 | -2.206729 |
| 42 | 1 | 0 | -3.833637 | -2.577546 | -2.016423 |

---
